# Supplementary material for: Analytical factors to be considered for the application of enriched strontium spikes to monitor biological systems
Source: Royal Society of Chemistry journal article supplement (doi:10.1039/c3ja50212k), 2013-09-24
Supplement: c3ja50212k.xlsx [file c3ja50212k.xlsx]

## Sheet: IPD - otolith example
						constants	IUPAC	M (g/mol)	abundance	sources:					External mass bias correction (SSB NIST SRM 987)												84	86	87	88
							85Rb	84.9118	0.7217	(M. Berglund and M. E. Wieser, Pure Appl. Chem., 2011, 83, 397-410)					f 84/88		f 86/88	f 87/88									0.0056	0.0986	0.07	0.8258	natural Sr	IUPAC representative isotopic composition (M. Berglund and M. E. Wieser, Pure Appl. Chem., 2011, 83, 397-410)
							87Rb	86.9092	0.2783	(J. de Laeter et al., Pure Appl. Chem., 2003, 75, 683-800)					-1.7486		-1.6149	-1.6152									0.764	0.0464	0.0196	0.17	Spike 2 (84-Sr product)	certificate
							84Sr	83.9134	0.0056																		2e-05	0.963	0.0102	0.0268	Spike 1 (86-Sr product)	certificate
							86Sr	85.9093	0.0986																		0	0	0.2783	0	natural Rb	IUPAC representative isotopic composition (M. Berglund and M. E. Wieser, Pure Appl. Chem., 2011, 83, 397-410)
							87Sr	86.9089	0.07
							88Sr	87.9056	0.8258							Baseline																molar ratio
																84/88															Results	xSp1/xSp2
															mean	0.00686802															mean (core region)	2.97932
															SD	3.48274e-05															SD	0.213825
															mean + 2 SD	0.00693767															RSD /%	7.17697
																																Outlier exl. (baseline 84/88 mb corr) - exemplarily shown on 84Sr/88Sr
TRA (time resolved analyses)	Signals raw (V)					Signals blank corrected (V)					Isotope ratios (raw)				Isotope ratios (mass bias corrected)						Isotope abundances					molar fractions				molar ratio		molar ratio
	88	87	86	85	84	88	87	86	85	84	84/88	86/88	87/88	88/88	84/88		86/88	87/88	88/88	sum	84	86	87	88	sum	natural Rb	Spike 1 (86-Sr product)	Spike 2 (84-Sr product)	natural Sr	xSp1/xSp2		xSp1/xSp2
Time (s)
0	-0.00169546	-0.00658276	-0.00114478	-0.00589613	-0.00428295	-6.83831e-06	-3.27467e-05	-1.84826e-05	0.000209634	2.04163e-05	-2.98558	2.70281	4.78872	1	-3.23835		2.80496	4.87774	1	5.44434	-0.594811	0.515206	0.895928	0.183677	1	3.16267	0.535181	-0.781244	0.365882	-0.685037
0.2	-0.00174939	-0.00648904	-0.00115106	-0.00610165	-0.00439148	-6.07773e-05	6.09803e-05	-2.47686e-05	4.10676e-06	-8.81187e-05	1.44986	0.407531	-1.00334	1	1.57261		0.422933	-1.02199	1	1.97356	0.796843	0.2143	-0.517842	0.506699	1	-2.03822	0.131957	1.04009	0.39519	0.126871		0.126871
0.4	-0.00149013	-0.00647812	-0.00126728	-0.00600989	-0.00423927	0.000198487	7.18963e-05	-0.000140986	9.58708e-05	6.40913e-05	0.3229	-0.710303	0.362222	1	0.350238		-0.737148	0.368956	1	0.982046	0.356641	-0.750625	0.375701	1.01828	1	1.05753	-0.921201	0.458266	1.16864	-2.01019		-2.01019
0.6	-0.00159468	-0.00620893	-0.00109388	-0.00602121	-0.0042937	9.39397e-05	0.00034109	3.24134e-05	8.45498e-05	9.66431e-06	0.102878	0.345044	3.63095	1	0.111588		0.358085	3.69845	1	5.16812	0.0215916	0.0692873	0.715627	0.193494	1	2.51064	0.0473954	0.026594	0.227298	1.78219		1.78219
0.8	-0.00170095	-0.00662468	-0.00119184	-0.00624778	-0.00446627	-1.23363e-05	-7.46637e-05	-6.55526e-05	-0.000142019	-0.000162902	13.2051	5.3138	6.05235	1	14.3231		5.51463	6.16487	1	27.0026	0.530434	0.204226	0.228307	0.0370335	1	0.790729	0.189271	0.695045	-0.10438	0.272314		0.272314
1	-0.00180984	-0.00631703	-0.00117903	-0.00604187	-0.00437409	-0.000121225	0.000232984	-5.27396e-05	6.38938e-05	-7.07267e-05	0.583432	0.435055	-1.92191	1	0.632828		0.451497	-1.95764	1	0.126687	4.99522	3.56389	-15.4526	7.89348	1	-58.1228	2.55502	6.4785	8.142	0.394384		0.394384
1.2	-0.00166257	-0.00659258	-0.00123211	-0.00611148	-0.00423941	2.60507e-05	-4.25647e-05	-0.000105817	-5.71824e-06	6.39563e-05	2.45507	-4.06195	-1.63392	1	2.66293		-4.21547	-1.66429	1	-2.21683	-1.20123	1.90157	0.750753	-0.451094	1	2.80506	2.08004	-1.57022	-0.290509	-1.32468		-1.32468
1.4	-0.00178621	-0.00659266	-0.00104712	-0.00617284	-0.00434371	-9.75923e-05	-4.26457e-05	7.91724e-05	-6.70772e-05	-4.03477e-05	0.413431	-0.811256	0.436978	1	0.448434		-0.841917	0.445102	1	1.05162	0.426423	-0.800591	0.423254	0.950915	1	1.24852	-0.967383	0.55033	1.06961	-1.75782		-1.75782
1.6	-0.00187627	-0.00666889	-0.00104018	-0.00599484	-0.00437763	-0.000187656	-0.00011887	8.61094e-05	0.000110917	-7.42647e-05	0.395748	-0.458867	0.633444	1	0.429255		-0.47621	0.645219	1	1.59826	0.268576	-0.297955	0.4037	0.625679	1	1.26489	-0.39769	0.346424	0.699255	-1.14799		-1.14799
1.8	-0.00153064	-0.00649278	-0.00107793	-0.0061926	-0.00430573	0.00015798	5.72423e-05	4.83604e-05	-8.68442e-05	-2.36569e-06	-0.0149746	0.306118	0.362339	1	-0.0162425	1.72764	0.317687	0.369075	1	1.67052	-0.00972301	0.190173	0.220934	0.598616	1	0.60834	0.12416	-0.0180407	0.724577	-6.88223			-0.458115
2	-0.00175821	-0.00661543	-0.00113387	-0.00622578	-0.00421537	-6.95963e-05	-6.54127e-05	-7.58263e-06	-0.000120022	8.79963e-05	-1.26438	0.108952	0.939888	1	-1.37143		0.113069	0.95736	1	0.698998	-1.962	0.161759	1.36962	1.43062	1	4.53209	0.0608551	-2.58464	2.26251	-0.0235449
2.2	-0.00181722	-0.0065896	-0.00121386	-0.00617453	-0.0043714	-0.000128597	-3.95847e-05	-8.75626e-05	-6.87712e-05	-6.80357e-05	0.52906	0.680906	0.307819	1	0.573853		0.70664	0.313542	1	2.59403	0.22122	0.27241	0.12087	0.3855	1	0.305056	0.228068	0.286614	0.400416	0.795732		0.795732
2.4	-0.00155736	-0.00673951	-0.0011983	-0.00604122	-0.00434856	0.000131256	-0.000189493	-7.20086e-05	6.45358e-05	-4.51937e-05	-0.344318	-0.548613	-1.44369	1	-0.37347		-0.569348	-1.47053	1	-1.41335	0.264245	0.402837	1.04046	-0.70754	1	3.93336	0.498133	0.352788	-0.945585	1.41199
2.6	-0.00178052	-0.00650666	-0.00108403	-0.00610382	-0.00416752	-9.19013e-05	4.33563e-05	4.22634e-05	1.93476e-06	0.000135842	-1.47813	-0.459878	-0.47177	1	-1.60328		-0.477259	-0.48054	1	-1.56108	1.02703	0.305724	0.307826	-0.640583	1	1.2657	0.361447	1.35209	-1.06578	0.267325
2.8	-0.00171154	-0.00642178	-0.00110394	-0.00615759	-0.00424564	-2.29223e-05	0.000128238	2.23484e-05	-5.18322e-05	5.77283e-05	-2.51843	-0.974962	-5.59447	1	-2.73166		-1.01181	-5.69847	1	-8.44194	0.323582	0.119855	0.675019	-0.118456	1	2.45001	0.128046	0.425257	-0.235143	0.301103
3	-0.00171672	-0.00656428	-0.00100256	-0.00622229	-0.00424124	-2.81003e-05	-1.42657e-05	0.000123734	-0.000116534	6.21313e-05	-2.21105	-4.40331	0.507672	1	-2.39825		-4.56973	0.517109	1	-5.45087	0.439976	0.838348	-0.0948672	-0.183457	1	-0.320877	0.880549	0.578573	-0.369839	1.52193
3.2	-0.00179836	-0.00651696	-0.00112582	-0.00618714	-0.00424124	-0.000109747	3.30533e-05	4.74371e-07	-8.13782e-05	6.21273e-05	-0.566094	-0.00432239	-0.301176	1	-0.614023		-0.00448576	-0.306775	1	0.0747167	-8.21802	-0.0600369	-4.10584	13.3839	1	-18.586	-1.4313	-10.8921	18.4959	0.131407
3.4	-0.00165831	-0.00655496	-0.00110728	-0.00601434	-0.00425895	3.03097e-05	-4.93773e-06	1.90114e-05	9.14208e-05	4.44143e-05	1.46535	0.627237	-0.162909	1	1.58941		0.650943	-0.165938	1	3.07442	0.51698	0.211729	-0.0539737	0.325265	1	-0.310205	0.161781	0.674841	0.249704	0.239732		0.239732
3.6	-0.00169999	-0.00647015	-0.00114504	-0.00612813	-0.00418694	-1.13683e-05	7.98703e-05	-1.87456e-05	-2.23722e-05	0.000116426	-10.2413	1.64894	-7.02569	1	-11.1084		1.71126	-7.1563	1	-15.5534	0.714208	-0.110024	0.460111	-0.0642945	1	1.65917	-0.132111	0.936784	-0.266417	-0.141026
3.8	-0.00160001	-0.00664342	-0.00121184	-0.00628879	-0.0044138	8.86117e-05	-9.34027e-05	-8.55426e-05	-0.000183029	-0.000110434	-1.24627	-0.965365	-1.05407	1	-1.35178	-1.9389	-1.00185	-1.07366	1	-2.42729	0.556909	0.412744	0.442329	-0.411981	1	1.68805	0.461326	0.7338	-0.66492	0.62868			0.517732
4	-0.00167278	-0.00652876	-0.00110223	-0.00616136	-0.00441027	1.58417e-05	2.12603e-05	2.40644e-05	-5.56042e-05	-0.000106907	-6.74844	1.51905	1.34205	1	-7.3198		1.57646	1.36699	1	-3.37634	2.16797	-0.466915	-0.404874	-0.296179	1	-1.40263	-0.526983	2.84446	-0.927118	-0.185266
4.2	-0.00168276	-0.00653383	-0.00121177	-0.0060292	-0.00411977	5.85969e-06	1.61893e-05	-8.54756e-05	7.65558e-05	0.000183592	31.3314	-14.5871	2.76282	1	33.9841		-15.1384	2.81418	1	22.6599	1.49975	-0.668068	0.124192	0.0441308	1	0.417668	-0.75499	1.96543	-0.326664	-0.384134		-0.384134
4.4	-0.00181191	-0.006584	-0.00114725	-0.00607943	-0.00445619	-0.000123293	-3.39807e-05	-2.09556e-05	2.63258e-05	-0.000152821	1.23949	0.169966	0.275609	1	1.34443		0.176389	0.280732	1	2.80155	0.479888	0.0629613	0.100206	0.356945	1	0.239554	0.00417267	0.625902	0.303257	0.00666664		0.00666664
4.6	-0.00175816	-0.00640288	-0.000885973	-0.00593322	-0.00426121	-6.95383e-05	0.000147138	0.00024032	0.000172538	4.21553e-05	-0.606217	-3.45593	-2.11593	1	-0.657543		-3.58655	-2.15527	1	-5.39936	0.121782	0.664255	0.399171	-0.185207	1	1.46747	0.710726	0.161438	-0.280575	4.40247
4.8	-0.00173823	-0.00674063	-0.0013473	-0.00610184	-0.00432914	-4.96143e-05	-0.000190608	-0.000221009	3.92176e-06	-2.57747e-05	0.519501	4.45453	3.84179	1	0.563485		4.62289	3.91321	1	10.0996	0.0557929	0.457731	0.387462	0.099014	1	1.34756	0.462617	0.0723556	0.089992	6.39366		6.39366
5	-0.00154152	-0.0065039	-0.000956308	-0.00594805	-0.00439782	0.000147096	4.61163e-05	0.000169984	0.000157704	-9.44557e-05	-0.642138	1.1556	0.313512	1	-0.696505		1.19928	0.31934	1	1.82211	-0.382251	0.658179	0.175258	0.548814	1	0.454035	0.63123	-0.50583	0.748229	-1.24791
5.2	-0.00163306	-0.00659124	-0.001135	-0.00616496	-0.00444451	5.55557e-05	-4.12217e-05	-8.71263e-06	-5.91992e-05	-0.000141141	-2.54053	-0.156827	-0.741989	1	-2.75562		-0.162754	-0.755783	1	-2.67416	1.03046	0.0608618	0.282625	-0.37395	1	1.1021	0.0731037	1.35415	-0.733972	0.0539849
5.4	-0.00160396	-0.00667695	-0.000996898	-0.00599848	-0.00418191	8.46587e-05	-0.000126931	0.000129394	0.000107281	0.000121457	1.43467	1.52842	-1.49932	1	1.55614		1.58619	-1.52719	1	2.61513	0.595051	0.606543	-0.583984	0.38239	1	-2.2454	0.563253	0.77676	0.28487	0.725132		0.725132
5.6	-0.00177144	-0.00653786	-0.00143146	-0.00618938	-0.00441649	-8.28273e-05	1.21533e-05	-0.000305168	-8.36192e-05	-0.00011312	1.36573	3.68438	-0.14673	1	1.48136		3.82363	-0.149458	1	6.15553	0.240655	0.62117	-0.0242802	0.162455	1	-0.160203	0.618434	0.314156	0.111982	1.96855		1.96855
5.8	-0.00166707	-0.00641572	-0.000911052	-0.00603011	-0.00425231	2.15487e-05	0.000134292	0.000215241	7.56468e-05	5.10583e-05	2.36944	9.98857	6.23204	1	2.57005	3.00701	10.3661	6.34789	1	20.284	0.126703	0.511047	0.31295	0.0492999	1	1.09153	0.52181	0.165765	0.00864055	3.14789		3.14789	1.9763
6	-0.00144984	-0.00633091	-0.000862152	-0.00602188	-0.00420271	0.00023878	0.000219109	0.00026414	8.38778e-05	0.000100655	0.421541	1.10621	0.917621	1	0.45723		1.14802	0.934679	1	3.53993	0.129164	0.324305	0.264039	0.282492	1	0.851107	0.298208	0.16687	0.298053	1.78707		1.78707
6.2	-0.00169641	-0.00655943	-0.00116558	-0.00620266	-0.00458014	-7.79731e-06	-9.41473e-06	-3.92906e-05	-9.68992e-05	-0.00027677	35.4955	5.039	1.20743	1	38.5008		5.22944	1.22988	1	45.9601	0.8377	0.113782	0.0267597	0.021758	1	0.066603	0.0859821	1.09795	-0.202467	0.0783116		0.0783116
6.4	-0.00183793	-0.00665067	-0.00122072	-0.00613991	-0.00439913	-0.00014931	-0.00010065	-9.44236e-05	-3.41482e-05	-9.57607e-05	0.641353	0.632399	0.674098	1	0.695654		0.6563	0.686629	1	3.03858	0.22894	0.215989	0.22597	0.329101	1	0.70117	0.176012	0.297225	0.331625	0.592184		0.592184
6.6	-0.00174338	-0.00651099	-0.0010383	-0.00606744	-0.00439664	-5.47633e-05	3.90313e-05	8.79964e-05	3.83228e-05	-9.32687e-05	1.70312	-1.60685	-0.712727	1	1.84732		-1.66758	-0.725976	1	0.453765	4.07109	-3.67498	-1.59989	2.20378	1	-6.39818	-4.24763	5.31622	1.71211	-0.798995		-0.798995
6.8	-0.00163998	-0.00648605	-0.00123748	-0.00611532	-0.00421882	4.86347e-05	6.39643e-05	-0.000111183	-9.55724e-06	8.45443e-05	1.73835	-2.28608	1.3152	1	1.88553		-2.37248	1.33965	1	1.8527	1.01772	-1.28055	0.723077	0.539752	1	2.44996	-1.43747	1.329	0.426672	-1.08162		-1.08162
7	-0.00194439	-0.00675719	-0.001013	-0.00612449	-0.00420657	-0.00025577	-0.000207177	0.00011329	-1.87312e-05	9.67913e-05	-0.378431	-0.442938	0.810011	1	-0.410471		-0.459678	0.825069	1	0.95492	-0.429848	-0.481379	0.864019	1.04721	1	2.81391	-0.616233	-0.572919	1.40605	1.0756
7.2	-0.00161334	-0.0069278	-0.00121672	-0.00603551	-0.00425647	7.52817e-05	-0.00037778	-9.04236e-05	7.02498e-05	4.68923e-05	0.622891	-1.20114	-5.01822	1	0.675629		-1.24653	-5.1115	1	-4.68241	-0.144291	0.266216	1.09164	-0.213565	1	3.98227	0.309025	-0.187184	-0.230111	-1.65091		-1.65091
7.4	-0.00149002	-0.00640013	-0.000979731	-0.00610567	-0.00421623	0.000198596	0.000149888	0.000146561	8.67556e-08	8.71353e-05	0.438757	0.737989	0.754741	1	0.475905		0.76588	0.768771	1	3.01056	0.158079	0.254398	0.255358	0.332165	1	0.806367	0.218176	0.204315	0.353092	1.06784		1.06784
7.6	-0.00167814	-0.00666313	-0.000942023	-0.00626475	-0.00423642	1.04787e-05	-0.00011311	0.00018427	-0.00015899	6.69493e-05	6.38909	17.5852	-10.7943	1	6.93003		18.2498	-10.9949	1	15.1849	0.456376	1.20184	-0.724069	0.0658549	1	-2.66794	1.22772	0.597928	-0.0831871	2.05329		2.05329
7.8	-0.00163335	-0.00659221	-0.00117172	-0.00605975	-0.00426098	5.52727e-05	-4.21967e-05	-4.54286e-05	4.60108e-05	4.23843e-05	0.766822	-0.8219	-0.763428	1	0.831745	5.18893	-0.852963	-0.77762	1	0.201162	4.1347	-4.24018	-3.86564	4.97112	1	-15.3569	-5.18235	5.3748	5.08148	-0.964194		-0.964194	0.12033
8	-0.00157141	-0.00659192	-0.00110408	-0.00601132	-0.00419649	0.000117207	-4.18987e-05	2.22124e-05	9.44338e-05	0.000106871	0.911819	0.189515	-0.357477	1	0.989019		0.196677	-0.364123	1	1.82157	0.542948	0.107971	-0.199895	0.548976	1	-0.899374	0.0249771	0.706864	0.518455	0.0353351		0.0353351
8.2	-0.00156893	-0.00637571	-0.00112495	-0.0062776	-0.00440673	0.000119685	0.000174303	1.34537e-06	-0.000171836	-0.000103359	-0.863592	0.011241	1.45635	1	-0.936708		0.0116658	1.48343	1	1.55838	-0.601076	0.00748583	0.9519	0.64169	1	3.2412	-0.0504434	-0.793653	0.942072	0.0635585
8.4	-0.00185754	-0.00673562	-0.001194	-0.0060796	-0.0043302	-0.000168923	-0.000185603	-6.77036e-05	2.61638e-05	-2.68367e-05	0.158869	0.400795	1.09874	1	0.17232		0.415943	1.11916	1	2.70743	0.0636471	0.15363	0.413368	0.369354	1	1.36815	0.111937	0.0801739	0.427131	1.39617		1.39617
8.6	-0.0015593	-0.00671741	-0.00124249	-0.0063695	-0.00432635	0.000129321	-0.000167393	-0.000116195	-0.000263744	-2.29797e-05	-0.177695	-0.8985	-1.2944	1	-0.19274		-0.932458	-1.31846	1	-1.44366	0.133508	0.645898	0.913277	-0.692684	1	3.46774	0.75419	0.18133	-0.900608	4.15921
8.8	-0.00162308	-0.00648389	-0.00109943	-0.0062112	-0.00420776	6.55427e-05	6.61273e-05	2.68614e-05	-0.00010544	9.56053e-05	1.45867	0.40983	1.00892	1	1.58217		0.425319	1.02767	1	4.03517	0.392096	0.105403	0.25468	0.247821	1	0.828246	0.0650702	0.511801	0.192627	0.12714		0.12714
9	-0.00167832	-0.00626925	-0.000943575	-0.0057646	-0.0042978	1.02987e-05	0.000280769	0.000182717	0.000341154	5.56631e-06	0.540487	17.7418	27.2626	1	0.586248		18.4123	27.7694	1	47.768	0.0122728	0.385453	0.581339	0.0209345	1	2.07087	0.398558	0.0159866	0.00912501	24.9308		24.9308
9.2	-0.0017859	-0.00667193	-0.00118701	-0.00621367	-0.00429233	-9.72793e-05	-0.000121914	-6.07136e-05	-0.000107906	1.10343e-05	-0.113429	0.624117	1.25323	1	-0.123033		0.647705	1.27653	1	2.8012	-0.0439214	0.231224	0.455708	0.356989	1	1.52422	0.19815	-0.060707	0.438362	-3.26403
9.4	-0.00167421	-0.00653726	-0.00120736	-0.0060606	-0.0041217	1.44107e-05	1.27603e-05	-8.10666e-05	4.51568e-05	0.000181668	12.6065	-5.62545	0.885472	1	13.6738		-5.83806	0.901933	1	9.7377	1.40422	-0.599532	0.0926228	0.102694	1	0.286815	-0.687448	1.8397	-0.232055	-0.373675		-0.373675
9.6	-0.00176425	-0.00669957	-0.00106669	-0.00608908	-0.00439062	-7.56373e-05	-0.000149554	5.96044e-05	1.66818e-05	-8.72567e-05	1.15362	-0.788029	1.97725	1	1.25129		-0.817812	2.014	1	3.44748	0.362958	-0.23722	0.584195	0.290067	1	2.01042	-0.296107	0.473152	0.263461	-0.625818		-0.625818
9.8	-0.00178137	-0.00643812	-0.00113251	-0.00621872	-0.00430103	-9.27553e-05	0.000111896	-6.22163e-06	-0.000112961	2.33931e-06	-0.0252202	0.0670757	-1.20636	1	-0.0273555	1.6975	0.0696108	-1.22879	1	-0.18653	0.146655	-0.373188	6.5876	-5.36107	1	25.2915	0.271574	0.239961	-6.55018	1.13174			4.24833
10	-0.00158942	-0.00662423	-0.00110538	-0.00617649	-0.00450546	9.91987e-05	-7.42167e-05	2.09164e-05	-7.07362e-05	-0.000202091	-2.03723	0.210853	-0.748162	1	-2.20971		0.218822	-0.76207	1	-1.75296	1.26056	-0.12483	0.434733	-0.570463	1	1.70792	-0.104169	1.65749	-1.02863	-0.0628472
10.2	-0.00163139	-0.00640744	-0.00108462	-0.006195	-0.0042507	5.72297e-05	0.00014258	4.16694e-05	-8.92382e-05	5.26623e-05	0.920192	0.728108	2.49137	1	0.998101		0.755626	2.53768	1	5.29141	0.188627	0.142802	0.479585	0.188986	1	1.65775	0.118594	0.245612	0.174441	0.482852		0.482852
10.4	-0.00184305	-0.00665881	-0.0012157	-0.0059535	-0.00430541	-0.000154437	-0.000108789	-8.94096e-05	0.000152257	-2.04669e-06	0.0132526	0.578938	0.70442	1	0.0143746		0.600819	0.717515	1	2.33271	0.00616219	0.257563	0.307589	0.428686	1	0.968467	0.214904	0.00431265	0.511254	49.8311		49.8311
10.6	-0.00182657	-0.0066818	-0.00110992	-0.00601544	-0.00432538	-0.000137953	-0.000131779	1.63754e-05	9.03238e-05	-2.20127e-05	0.159566	-0.118702	0.955242	1	0.173076		-0.123189	0.972999	1	2.02289	0.0855589	-0.0608974	0.480995	0.494343	1	1.5794	-0.127874	0.107736	0.580595	-1.18693		-1.18693
10.8	-0.0016387	-0.00661431	-0.00125023	-0.00613309	-0.00434159	4.99177e-05	-6.42907e-05	-0.000123938	-2.73272e-05	-3.82187e-05	-0.765634	-2.48284	-1.28793	1	-0.830457		-2.57668	-1.31188	1	-3.71901	0.2233	0.692839	0.352749	-0.268889	1	1.32262	0.747278	0.295269	-0.410646	2.53084
11	-0.00153711	-0.00655787	-0.00106048	-0.00597784	-0.00436456	0.000151511	-7.85473e-06	6.58074e-05	0.000127919	-6.11897e-05	-0.403864	0.434341	-0.0518428	1	-0.438057		0.450757	-0.0528065	1	0.959893	-0.45636	0.469591	-0.0550129	1.04178	1	-0.514377	0.37618	-0.607414	1.37438	-0.619314
11.2	-0.00170274	-0.00654347	-0.000974535	-0.00600684	-0.00437743	-1.41203e-05	6.54927e-06	0.000151757	9.89148e-05	-7.40647e-05	5.24526	-10.7475	-0.463819	1	5.68935		-11.1536	-0.472441	1	-4.93673	-1.15245	2.25932	0.0956991	-0.202563	1	0.364751	2.42017	-1.50841	-0.0133126	-1.60445		-1.60445
11.4	-0.00163708	-0.00651135	-0.0011285	-0.00617533	-0.0041334	5.15357e-05	3.86633e-05	-2.20463e-06	-6.95752e-05	0.00016997	3.29811	-0.0427787	0.750223	1	3.57734		-0.0443955	0.764169	1	5.29712	0.675338	-0.00838106	0.144261	0.188782	1	0.445991	-0.0562463	0.883596	0.0485323	-0.0636561		-0.0636561
11.6	-0.00171317	-0.00659445	-0.00123592	-0.0060757	-0.00446993	-2.45483e-05	-4.44327e-05	-0.000109627	3.00568e-05	-0.000166567	6.78526	4.46575	1.81001	1	7.35974		4.63453	1.84366	1	14.8379	0.496008	0.312343	0.124253	0.0673949	1	0.405301	0.299374	0.649671	-0.061846	0.460808		0.460808
11.8	-0.00170294	-0.00650591	-0.00117266	-0.00625481	-0.00411537	-1.43223e-05	4.41123e-05	-4.63706e-05	-0.000149052	0.000187999	-13.1263	3.23765	-3.07997	1	-14.2377	0.0096085	3.36001	-3.13722	1	-13.0149	1.09395	-0.258167	0.241049	-0.0768351	1	0.871299	-0.298438	1.43466	-0.378698	-0.20802			7.98663
12	-0.00159831	-0.00673884	-0.00101986	-0.00617048	-0.00444825	9.03087e-05	-0.00018882	0.000106429	-6.47232e-05	-0.000144882	-1.60429	1.17851	-2.09083	1	-1.74012		1.22305	-2.12969	1	-1.64677	1.05669	-0.742695	1.29326	-0.60725	1	4.82699	-0.736073	1.39043	-0.997695	-0.529384
12.2	-0.00174533	-0.00663074	-0.00131887	-0.0062278	-0.00430681	-5.67093e-05	-8.07187e-05	-0.000192576	-0.000122045	-3.44569e-06	0.0607605	3.39584	1.42338	1	0.0659049		3.52418	1.44984	1	6.03992	0.0109115	0.583481	0.240042	0.165565	1	0.795139	0.586971	0.0129564	0.178774	45.3036		45.3036
12.4	-0.00183764	-0.00669494	-0.00103628	-0.00591032	-0.0042376	-0.00014902	-0.000144926	9.00124e-05	0.000195444	6.57663e-05	-0.441324	-0.604028	0.972523	1	-0.478689		-0.626856	0.990602	1	0.885056	-0.540857	-0.708267	1.11925	1.12987	1	3.71549	-0.858929	-0.719225	1.54415	1.19424
12.6	-0.00143019	-0.00658863	-0.00117228	-0.00620504	-0.00441659	0.000258424	-3.86107e-05	-4.59846e-05	-9.92792e-05	-0.000113229	-0.438151	-0.177943	-0.149409	1	-0.475248		-0.184668	-0.152186	1	0.187898	-2.52928	-0.982808	-0.809939	5.32203	1	-4.42318	-1.59457	-3.36323	7.1888	0.474119
12.8	-0.00168917	-0.00654182	-0.00114266	-0.00602187	-0.00435672	-5.53311e-07	8.20227e-06	-1.63636e-05	8.38868e-05	-5.33537e-05	96.4262	29.574	-14.824	1	104.59		30.6917	-15.0995	1	121.182	0.863081	0.253269	-0.124602	0.00825203	1	-0.477948	0.232082	1.13137	-0.230444	0.205134		0.205134
13	-0.00158059	-0.00653958	-0.0011436	-0.00617756	-0.00426657	0.000108031	1.04413e-05	-1.73086e-05	-7.18022e-05	3.67933e-05	0.340582	-0.16022	0.0966509	1	0.369418		-0.166275	0.0984476	1	1.30159	0.28382	-0.127748	0.0756364	0.768291	1	0.0377572	-0.238605	0.365173	0.862928	-0.653401		-0.653401
13.2	-0.00165957	-0.0065445	-0.00102267	-0.00599634	-0.00432752	2.90427e-05	5.51227e-06	0.000103626	0.000109421	-2.41557e-05	-0.83173	3.56807	0.189799	1	-0.902149		3.70292	0.193327	1	3.9941	-0.22587	0.927098	0.0484031	0.250369	1	0.0763634	0.94289	-0.298114	0.333954	-3.16284
13.4	-0.00168169	-0.00671674	-0.0011374	-0.00611019	-0.00435124	6.92969e-06	-0.00016672	-1.11056e-05	-4.43124e-06	-4.78737e-05	-6.90849	-1.60262	-24.0588	1	-7.4934		-1.66319	-24.506	1	-32.6626	0.229418	0.0509202	0.750277	-0.0306161	1	2.69826	0.0486752	0.301022	-0.100623	0.1617
13.6	-0.00162995	-0.00647179	-0.00114867	-0.00605797	-0.00431723	5.86697e-05	7.82223e-05	-2.23816e-05	4.77908e-05	-1.38677e-05	-0.236369	-0.381485	1.33327	1	-0.256381		-0.395903	1.35805	1	1.70577	-0.150303	-0.232097	0.796153	0.586247	1	2.69479	-0.309246	-0.202306	0.761597	1.52861
13.8	-0.00181524	-0.00670725	-0.00112792	-0.00618721	-0.00433224	-0.000126618	-0.000157235	-1.62563e-06	-8.14462e-05	-2.88747e-05	0.228045	0.0128388	1.2418	1	0.247353	9.39269	0.013324	1.26489	1	2.52556	0.0979396	0.00527568	0.500833	0.395951	1	1.67803	-0.0471554	0.124857	0.455303	-0.377674		-0.377674	11.1194
14	-0.00169486	-0.00650845	-0.00106357	-0.00604876	-0.00423643	-6.24131e-06	4.15663e-05	6.27224e-05	5.70008e-05	6.69403e-05	-10.7254	-10.0496	-6.65986	1	-11.6334		-10.4294	-6.78367	1	-27.8465	0.41777	0.374531	0.24361	-0.0359112	1	0.865248	0.379781	0.548046	-0.168633	0.692973
14.2	-0.00186995	-0.00654562	-0.00123509	-0.00627446	-0.00436669	-0.000181337	4.39827e-06	-0.000108794	-0.000168697	-6.33197e-05	0.349182	0.599952	-0.0242546	1	0.378745		0.622626	-0.0247055	1	1.97667	0.191608	0.314988	-0.0124986	0.505902	1	-0.210967	0.258537	0.246733	0.553438	1.04784		1.04784
14.4	-0.00165898	-0.00654271	-0.00107664	-0.00603148	-0.00435683	2.96327e-05	7.30527e-06	4.96574e-05	7.42748e-05	-5.34597e-05	-1.80408	1.67576	0.246527	1	-1.95682		1.7391	0.25111	1	1.03339	-1.8936	1.68291	0.242997	0.967692	1	0.576395	1.70075	-2.49052	1.62933	-0.682888
14.6	-0.00179243	-0.00654592	-0.00134607	-0.00609629	-0.0043682	-0.000103814	4.09827e-06	-0.00021978	9.46876e-06	-6.48377e-05	0.624554	2.11705	-0.0394769	1	0.677433		2.19706	-0.0402108	1	3.83428	0.176678	0.573004	-0.0104872	0.260805	1	-0.137304	0.558321	0.229403	0.250477	2.4338		2.4338
14.8	-0.0013732	-0.00658183	-0.000971573	-0.00621382	-0.0040954	0.000315413	-3.18147e-05	0.000154719	-0.000108065	0.000207965	0.659344	0.490529	-0.100867	1	0.715167		0.509068	-0.102742	1	2.12149	0.337105	0.239958	-0.0484291	0.471366	1	-0.330865	0.179465	0.437752	0.474859	0.409969		0.409969
15	-0.00177291	-0.00654876	-0.00112045	-0.00587988	-0.00421172	-8.42973e-05	1.25627e-06	5.84337e-06	0.000225875	9.16453e-05	-1.08717	-0.0693186	-0.0149028	1	-1.17921		-0.0719384	-0.0151798	1	-0.266331	4.42762	0.270109	0.0569961	-3.75472	1	1.22278	0.589755	5.83757	-5.76763	0.101028
15.2	-0.00153616	-0.0063825	-0.00101294	-0.00614095	-0.00412148	0.000152454	0.000167516	0.000113354	-3.51922e-05	0.000181888	1.19307	0.743533	1.0988	1	1.29408		0.771634	1.11923	1	4.18495	0.309224	0.184383	0.267441	0.238952	1	0.876367	0.151413	0.403263	0.201428	0.375471		0.375471
15.4	-0.00158077	-0.0063607	-0.00122309	-0.00618749	-0.004515	0.000107844	0.000189319	-9.68006e-05	-8.17342e-05	-0.000211631	-1.96238	-0.897601	1.7555	1	-2.12853		-0.931525	1.78813	1	-0.271924	7.82766	3.42568	-6.57584	-3.6775	1	-22.8072	3.74668	10.2946	-6.6941	0.363946
15.6	-0.00173377	-0.00631508	-0.000816684	-0.0062149	-0.00411891	-4.51533e-05	0.000234939	0.000309608	-0.000109144	0.000184452	-4.08502	-6.85683	-5.20315	1	-4.43088		-7.11597	-5.29987	1	-15.8467	0.279609	0.44905	0.334446	-0.0631045	1	1.20085	0.465722	0.367193	-0.167121	1.26833
15.8	-0.00167918	-0.00667791	-0.0013235	-0.00612988	-0.00440758	9.44069e-06	-0.000127896	-0.000197204	-2.41212e-05	-0.00010421	-11.0384	-20.8887	-13.5473	1	-11.9729	-3.02364	-21.6782	-13.7991	1	-46.4502	0.257758	0.466697	0.297073	-0.0215284	1	1.05404	0.479725	0.338183	-0.111257	1.41854			1.06677
16	-0.00165308	-0.0063174	-0.00110462	-0.00615791	-0.00421936	3.55347e-05	0.000232616	2.16704e-05	-5.21532e-05	8.40093e-05	2.36415	0.609837	6.54617	1	2.56431		0.632885	6.66786	1	10.8651	0.236014	0.0582496	0.613698	0.0920381	1	2.17022	0.0408479	0.308577	0.0466037	0.132375		0.132375
16.2	-0.00185456	-0.00660497	-0.00128441	-0.00621291	-0.00454302	-0.000165939	-5.49557e-05	-0.000158117	-0.000107152	-0.00023965	1.4442	0.952858	0.33118	1	1.56647		0.988871	0.337336	1	3.89268	0.402415	0.254033	0.0866591	0.256892	1	0.217123	0.21843	0.52528	0.195859	0.415836		0.415836
16.4	-0.00176445	-0.00650897	-0.00107157	-0.00608493	-0.0041246	-7.58343e-05	4.10453e-05	5.47174e-05	2.08238e-05	0.000178763	-2.35729	-0.721538	-0.541249	1	-2.55687		-0.748808	-0.551311	1	-2.85699	0.894953	0.262097	0.192969	-0.350019	1	0.769952	0.284626	1.17635	-0.675255	0.241958
16.6	-0.00172409	-0.00651763	-0.00135239	-0.00617671	-0.00423802	-3.54723e-05	3.23873e-05	-0.000226099	-7.09482e-05	6.53503e-05	-1.84229	6.37395	-0.91303	1	-1.99827		6.61485	-0.930002	1	4.68657	-0.426382	1.41145	-0.19844	0.213375	1	-0.809153	1.45926	-0.560522	0.326418	-2.6034
16.8	-0.00165922	-0.00627283	-0.00103645	-0.00608951	-0.00421935	2.93937e-05	0.000277185	8.98404e-05	1.62488e-05	8.40193e-05	2.85841	3.05645	9.43009	1	3.10042		3.17197	9.6054	1	16.8778	0.183698	0.187937	0.569115	0.0592495	1	2.01726	0.181903	0.240318	0.0163725	0.756925		0.756925
17	-0.00184196	-0.00666074	-0.00103113	-0.00594973	-0.00415422	-0.00015334	-0.000110722	9.51644e-05	0.000156032	0.000149148	-0.972662	-0.620609	0.722065	1	-1.05501		-0.644064	0.735488	1	0.0364109	-28.9752	-17.6888	20.1997	27.4643	1	65.5228	-20.8065	-38.2315	41.8034	0.544224
17.2	-0.00159365	-0.00671025	-0.00127056	-0.00605768	-0.00434212	9.49687e-05	-0.000160229	-0.000144269	4.80758e-05	-3.87517e-05	-0.408047	-1.51912	-1.68717	1	-0.442594		-1.57653	-1.71854	1	-2.73766	0.161669	0.575867	0.627739	-0.365275	1	2.34464	0.639572	0.215311	-0.507409	2.97046
17.4	-0.00167746	-0.00641543	-0.00108464	-0.00602895	-0.00457136	1.11627e-05	0.000134583	4.16484e-05	7.68128e-05	-0.000267991	-24.0077	3.73103	12.0565	1	-26.0403		3.87205	12.2807	1	-8.88764	2.92995	-0.435666	-1.38177	-0.112516	1	-4.98689	-0.544393	3.84169	-0.909438	-0.141706
17.6	-0.00174585	-0.00660647	-0.00114723	-0.00618061	-0.00414638	-5.72283e-05	-5.64547e-05	-2.09416e-05	-7.48512e-05	0.000156984	-2.74312	0.365931	0.986483	1	-2.97537		0.379761	1.00482	1	-0.590789	5.03627	-0.642804	-1.70081	-1.69265	1	-5.70106	-0.639108	6.61685	-3.39112	-0.096588
17.8	-0.00181285	-0.00641775	-0.00115907	-0.0059294	-0.00427666	-0.000124232	0.00013227	-3.27736e-05	0.000176355	2.67053e-05	-0.214963	0.263809	-1.0647	1	-0.233163	-2.80704	0.27378	-1.08449	1	-0.0438762	5.3141	-6.23982	24.7171	-22.7914	1	95.7329	-3.86084	7.16792	-28.9495	-0.538628			0.435045
18	-0.00173954	-0.0063981	-0.00111354	-0.00616244	-0.00449515	-5.09203e-05	0.000151919	1.27504e-05	-5.66792e-05	-0.00019178	3.76627	-0.250399	-2.98347	1	4.08514		-0.259862	-3.03893	1	1.78635	2.28687	-0.145471	-1.7012	0.559801	1	-6.33051	-0.302593	2.99276	0.0716159	-0.101108		-0.101108
18.2	-0.00169721	-0.00665343	-0.00126103	-0.00604055	-0.0043739	-8.59531e-06	-0.000103415	-0.000134738	6.52088e-05	-7.05347e-05	8.20618	15.6757	12.0315	1	8.90096		16.2682	12.2552	1	38.4243	0.231649	0.423382	0.318944	0.0260252	1	1.12022	0.429623	0.303524	-0.0449113	1.41545		1.41545
18.4	-0.00173266	-0.00685455	-0.00114379	-0.00608213	-0.00434394	-4.40463e-05	-0.000304537	-1.74986e-05	2.36298e-05	-4.05727e-05	0.921137	0.397278	6.91401	1	0.999125		0.412293	7.04254	1	9.45396	0.105683	0.0436106	0.74493	0.105776	1	2.64112	0.0285364	0.137604	0.0988355	0.207381		0.207381
18.6	-0.00170066	-0.00651988	-0.00113568	-0.00599215	-0.00428043	-1.20453e-05	3.01393e-05	-9.38563e-06	0.000113609	2.29413e-05	-1.90458	0.779194	-2.50216	1	-2.06584		0.808643	-2.54867	1	-2.80587	0.736256	-0.288197	0.908337	-0.356396	1	3.36242	-0.282264	0.968251	-0.621742	-0.291519
18.8	-0.00172485	-0.00656198	-0.00107412	-0.00612913	-0.00422686	-3.62303e-05	-1.19577e-05	5.21734e-05	-2.33702e-05	7.65013e-05	-2.11153	-1.44005	0.330048	1	-2.2903		-1.49447	0.336183	1	-2.44859	0.935355	0.61034	-0.137297	-0.408398	1	-0.410493	0.65326	1.22991	-0.768939	0.531147
19	-0.00152354	-0.00656698	-0.00098813	-0.00607591	-0.00444482	0.000165082	-1.69667e-05	0.000138163	2.98488e-05	-0.000141455	-0.856877	0.836936	-0.102778	1	-0.929425		0.868568	-0.104688	1	0.834455	-1.11381	1.04088	-0.125457	1.19839	1	-0.816176	0.975388	-1.47052	1.72225	-0.663296
19.2	-0.00178948	-0.00680968	-0.00139622	-0.00623467	-0.004503	-0.000100865	-0.000259664	-0.000269924	-0.000128911	-0.000199633	1.9792	2.67608	2.57436	1	2.14677		2.77722	2.62222	1	8.54621	0.251196	0.324965	0.306828	0.117011	1	1.05177	0.315091	0.328314	0.0638813	0.959726		0.959726
19.4	-0.00160793	-0.00648769	-0.000954279	-0.00597235	-0.00410217	8.06877e-05	6.23233e-05	0.000172013	0.000133407	0.000201194	2.49349	2.13184	0.772401	1	2.70461		2.21241	0.78676	1	6.70378	0.403445	0.330025	0.117361	0.14917	1	0.357574	0.310942	0.527608	0.0619316	0.589343		0.589343
19.6	-0.00177884	-0.00661536	-0.000924125	-0.00614986	-0.00436034	-9.02243e-05	-6.53387e-05	0.000202167	-4.40992e-05	-5.69757e-05	0.631489	-2.24072	0.724181	1	0.684955		-2.3254	0.737643	1	0.0971944	7.04726	-23.9253	7.58936	10.2887	1	24.7199	-26.4559	9.14104	11.4358	-2.89419		-2.89419
19.8	-0.00170537	-0.00670718	-0.00112128	-0.00602698	-0.00439804	-1.67513e-05	-0.000157163	5.01437e-06	7.87818e-05	-9.46747e-05	5.65178	-0.299342	9.38212	1	6.13029	2.03663	-0.310655	9.55652	1	16.3762	0.374342	-0.01897	0.583563	0.0610644	1	2.07031	-0.0406912	0.490166	-0.0256397	-0.0830151		-0.0830151	0.0133703
20	-0.0015164	-0.00652226	-0.0011448	-0.00602361	-0.00417718	0.000172221	2.77533e-05	-1.85026e-05	8.21468e-05	0.000126183	0.732684	-0.107436	0.161149	1	0.794717		-0.111496	0.164145	1	1.84737	0.430189	-0.0603541	0.0888536	0.541311	1	0.148114	-0.145426	0.559083	0.545125	-0.260115		-0.260115
20.2	-0.0016864	-0.00633644	-0.00112345	-0.00594466	-0.00427053	2.21969e-06	0.000213576	2.84237e-06	0.000161101	3.28393e-05	14.7946	1.28053	96.219	1	16.0471		1.32892	98.0077	1	116.384	0.137881	0.0114185	0.842108	0.00859227	1	3.01975	0.00591443	0.180671	-0.0269802	0.032736		0.032736
20.4	-0.0017225	-0.00661691	-0.00126687	-0.00612013	-0.00440371	-3.38813e-05	-6.68967e-05	-0.000140577	-1.43732e-05	-0.000100349	2.96177	4.14909	1.97444	1	3.21253		4.3059	2.01115	1	10.5296	0.305096	0.408934	0.191	0.0949705	1	0.638446	0.403391	0.399185	0.0197363	1.01054		1.01054
20.6	-0.00168869	-0.00661654	-0.00109084	-0.00615246	-0.00409026	-7.43111e-08	-6.65247e-05	3.54514e-05	-4.67012e-05	0.000213111	-2867.83	-477.067	895.219	1	-3110.63		-495.097	911.861	1	-2692.87	1.15514	0.183855	-0.338621	-0.000371351	1	-1.24916	0.15042	1.51428	-0.317062	0.0993346
20.8	-0.00184713	-0.00655011	-0.00115785	-0.0059521	-0.00438579	-0.000158511	-8.97333e-08	-3.15626e-05	0.000153662	-8.24237e-05	0.519986	0.199119	0.000566101	1	0.564011		0.206645	0.000576624	1	1.77123	0.318429	0.116667	0.00032555	0.564579	1	-0.179626	0.0401042	0.412411	0.597474	0.0972433		0.0972433
21	-0.00155642	-0.00648269	-0.00103304	-0.0058928	-0.00425155	0.000132197	6.73283e-05	9.32494e-05	0.000212961	5.18113e-05	0.391926	0.705384	0.509304	1	0.425109		0.732043	0.518771	1	2.67592	0.158864	0.273567	0.193866	0.373703	1	0.572326	0.232961	0.204979	0.402777	1.13651		1.13651
21.2	-0.00150749	-0.00638101	-0.000909049	-0.00612529	-0.00439931	0.000181127	0.000169011	0.000217244	-1.95352e-05	-9.59467e-05	-0.529721	1.1994	0.933111	1	-0.574571		1.24473	0.950457	1	2.62062	-0.21925	0.474976	0.362684	0.381589	1	1.17944	0.455306	-0.290706	0.507153	-1.56621
21.4	-0.00169304	-0.00668388	-0.00147682	-0.00604047	-0.00425476	-4.42131e-06	-0.000133861	-0.00035053	6.52938e-05	4.86033e-05	-10.993	79.2818	30.2763	1	-11.9237		82.2782	30.8391	1	102.194	-0.116677	0.805121	0.301771	0.00978535	1	1.06023	0.841782	-0.152858	0.0159985	-5.50694
21.6	-0.00169761	-0.00673869	-0.0011808	-0.00637276	-0.00428471	-8.99331e-06	-0.000188675	-5.45106e-05	-0.000267002	1.86513e-05	-2.07391	6.06124	20.9795	1	-2.2495		6.29032	21.3695	1	26.4103	-0.0851751	0.238177	0.809134	0.0378641	1	2.89095	0.246487	-0.111939	0.0608958	-2.20198
21.8	-0.00171729	-0.00640931	-0.000958745	-0.00601535	-0.00425594	-2.86763e-05	0.00014071	0.000167547	9.04048e-05	4.74233e-05	-1.65375	-5.8427	-4.90685	1	-1.79376	-310.613	-6.06352	-4.99806	1	-11.8553	0.151304	0.511459	0.421587	-0.0843502	1	1.52152	0.537956	0.199205	-0.160611	2.70052			0.403383
22	-0.00161327	-0.00671643	-0.00110101	-0.00615736	-0.00437688	7.53527e-05	-0.000166414	2.52864e-05	-5.16022e-05	-7.35187e-05	-0.975661	0.335574	-2.20846	1	-1.05827		0.348256	-2.24952	1	-1.95953	0.540062	-0.177725	1.14799	-0.510327	1	4.27118	-0.141059	0.712462	-0.760069	-0.197988
22.2	-0.00167231	-0.00650815	-0.00115946	-0.00617269	-0.00423857	1.63117e-05	4.18653e-05	-3.31716e-05	-6.69282e-05	6.47943e-05	3.97226	-2.03361	2.56658	1	4.30858		-2.11047	2.61429	1	5.8124	0.741273	-0.363098	0.449779	0.172046	1	1.55781	-0.426091	0.9701	0.022461	-0.439224		-0.439224
22.4	-0.00168739	-0.00660521	-0.000958555	-0.00605072	-0.00441627	1.23069e-06	-5.51887e-05	0.000167737	5.50358e-05	-0.000112909	-91.7443	136.296	-44.8438	1	-99.5119		141.447	-45.6774	1	-2.74249	36.2852	-51.5761	16.6555	-0.364632	1	60.6378	-54.9842	47.5571	-8.44728	-1.15617
22.6	-0.00161894	-0.00668725	-0.00132279	-0.00619826	-0.00418448	6.96787e-05	-0.000137231	-0.000196499	-9.24992e-05	0.00011889	1.70627	-2.82007	-1.96948	1	1.85073		-2.92665	-2.00609	1	-2.08201	-0.888912	1.40568	0.963534	-0.480304	1	3.58583	1.55587	-1.16066	-0.393182	-1.34051		-1.34051
22.8	-0.00176316	-0.00646836	-0.0011277	-0.00598308	-0.00431508	-7.45383e-05	8.16593e-05	-1.41163e-06	0.000122675	-1.17157e-05	0.157177	0.0189383	-1.09553	1	0.170484		0.0196541	-1.1159	1	0.0742386	2.29644	0.264742	-15.0313	13.4701	1	-58.1256	-1.47845	2.89029	15.7645	-0.511524		-0.511524
23	-0.00150228	-0.00658989	-0.00107884	-0.00621011	-0.00423491	0.00018634	-3.98767e-05	4.74534e-05	-0.000104347	6.84573e-05	0.367379	0.254661	-0.214	1	0.398483		0.264285	-0.217978	1	1.44479	0.275807	0.182923	-0.150872	0.692142	1	-0.762266	0.0948161	0.355417	0.761904	0.266774		0.266774
23.2	-0.00173772	-0.00659087	-0.00118487	-0.00623446	-0.00420433	-4.91053e-05	-4.08517e-05	-5.85796e-05	-0.000128698	9.90383e-05	-2.01686	1.19294	0.831921	1	-2.18761		1.23802	0.847386	1	0.897798	-2.43664	1.37896	0.94385	1.11384	1	3.0725	1.38528	-3.20375	1.96337	-0.432393
23.4	-0.00181178	-0.00664388	-0.00117469	-0.00595042	-0.00427912	-0.000123166	-9.38607e-05	-4.83986e-05	0.000155337	2.42483e-05	-0.196875	0.392953	0.762065	1	-0.213543		0.407805	0.776231	1	1.97049	-0.10837	0.206956	0.393927	0.507487	1	1.25918	0.156477	-0.146538	0.639628	-1.06782
23.6	-0.00160231	-0.00662252	-0.000988837	-0.00610406	-0.00436766	8.63107e-05	-7.25017e-05	0.000137455	1.69376e-06	-6.42977e-05	-0.744956	1.59256	-0.840009	1	-0.808028		1.65275	-0.855624	1	0.9891	-0.816933	1.67097	-0.865053	1.01102	1	-3.44301	1.64454	-1.07954	1.39316	-1.52337
23.8	-0.00164634	-0.00651994	-0.00125958	-0.00615771	-0.0044049	4.22757e-05	3.00773e-05	-0.000133291	-5.19492e-05	-0.000101539	-2.40182	-3.15289	0.711455	1	-2.60517	-9.96562	-3.27205	0.724681	1	-4.15254	0.627368	0.787963	-0.174515	-0.240816	1	-0.592707	0.828495	0.82472	-0.488281	1.00458			-0.506121
24	-0.0017253	-0.00652017	-0.00114094	-0.00605603	-0.00414124	-3.66793e-05	2.98463e-05	-1.46496e-05	4.97288e-05	0.000162131	-4.42024	0.399398	-0.813708	1	-4.79448		0.414493	-0.828835	1	-4.20882	1.13915	-0.0984818	0.196928	-0.237596	1	0.755333	-0.113717	1.49538	-0.591865	-0.0760457
24.2	-0.00173492	-0.00670695	-0.00131566	-0.00624625	-0.00424231	-4.62993e-05	-0.000156935	-0.000189369	-0.000140493	6.10593e-05	-1.3188	4.0901	3.38957	1	-1.43045		4.24468	3.45258	1	7.26681	-0.196847	0.584119	0.475117	0.137612	1	1.65308	0.598512	-0.259139	0.200564	-2.30962
24.4	-0.0017237	-0.00665261	-0.00128276	-0.00624076	-0.00420937	-3.50813e-05	-0.000102595	-0.000156464	-0.000135	9.39933e-05	-2.6793	4.46003	2.92448	1	-2.90614		4.62859	2.97885	1	5.7013	-0.509734	0.811849	0.522486	0.175399	1	1.81249	0.842242	-0.669579	0.322905	-1.25787
24.6	-0.00151119	-0.00648388	-0.00100468	-0.00609619	-0.00431904	0.000177423	6.61323e-05	0.000121617	9.56776e-06	-1.56727e-05	-0.0883353	0.685467	0.372738	1	-0.0958143		0.711374	0.379668	1	1.99523	-0.0480217	0.356538	0.190288	0.501196	1	0.523491	0.310953	-0.0673401	0.610693	-4.61765
24.8	-0.00173438	-0.00653748	-0.00116422	-0.00602551	-0.0044664	-4.57573e-05	1.25353e-05	-3.79256e-05	8.02458e-05	-0.000163034	3.56301	0.828843	-0.273951	1	3.86467		0.860169	-0.279044	1	5.4458	0.709661	0.157951	-0.0512402	0.183628	1	-0.260685	0.116468	0.928672	0.0274064	0.125413		0.125413
25	-0.00158667	-0.00616846	-0.000930585	-0.00596158	-0.00433698	0.000101944	0.000381553	0.000195707	0.000144184	-3.36117e-05	-0.329708	1.91976	3.74278	1	-0.357623		1.99232	3.81236	1	6.44705	-0.0554708	0.309027	0.591334	0.15511	1	2.07026	0.304688	-0.0740297	0.193181	-4.11575
25.2	-0.00181665	-0.00671583	-0.00121998	-0.00627021	-0.00433365	-0.000128034	-0.000165813	-9.36886e-05	-0.000164451	-3.02827e-05	0.23652	0.731746	1.29506	1	0.256545		0.759402	1.31914	1	3.33509	0.0769231	0.227701	0.395534	0.299842	1	1.32247	0.197266	0.0982132	0.336473	2.00855		2.00855
25.4	-0.00162853	-0.00651502	-0.00101074	-0.0058795	-0.00419274	6.00877e-05	3.49983e-05	0.000115552	0.000226259	0.000110622	1.84101	1.92306	0.582453	1	1.99688		1.99574	0.593281	1	5.58591	0.357486	0.357282	0.10621	0.179022	1	0.308793	0.337273	0.467101	0.109683	0.722055		0.722055
25.6	-0.0017596	-0.00678519	-0.00140754	-0.00634445	-0.00446295	-7.09793e-05	-0.000235177	-0.000281252	-0.000238688	-0.000159588	2.24837	3.96245	3.31331	1	2.43873		4.1122	3.37491	1	10.9258	0.223207	0.376374	0.308892	0.0915262	1	1.06598	0.372815	0.291863	0.038651	1.27736		1.27736
25.8	-0.00165972	-0.00677587	-0.00104065	-0.00616892	-0.00425563	2.88937e-05	-0.000225852	8.56454e-05	-6.31652e-05	4.77363e-05	1.65214	2.96415	-7.81665	1	1.79202	0.0764334	3.07618	-7.96195	1	-2.09376	-0.855885	-1.46922	3.80271	-0.477611	1	13.8715	-1.44093	-1.11802	-0.301441	1.28882		1.28882	1.08444
26	-0.00169999	-0.00644022	-0.00105258	-0.00605993	-0.00425219	-1.13713e-05	0.0001098	7.37084e-05	4.58308e-05	5.11813e-05	-4.50092	-6.48196	-9.6559	1	-4.88199		-6.72694	-9.8354	1	-20.4443	0.238794	0.329037	0.481082	-0.0489133	1	1.728	0.340376	0.313537	-0.134823	1.0856
26.2	-0.00159075	-0.0062367	-0.00110072	-0.00613886	-0.00437239	9.78637e-05	0.000313321	2.55754e-05	-3.31002e-05	-6.90227e-05	-0.705294	0.261337	3.20161	1	-0.765008		0.271214	3.26113	1	3.76733	-0.203064	0.0719909	0.865633	0.26544	1	3.03318	0.0492885	-0.268541	0.375116	-0.183542
26.4	-0.00174096	-0.00665319	-0.00125082	-0.00623238	-0.00415196	-5.23413e-05	-0.000103176	-0.00012453	-0.000126621	0.000151403	-2.89262	2.37918	1.97121	1	-3.13752		2.4691	2.00785	1	2.33944	-1.34114	1.05543	0.858264	0.427453	1	2.95543	1.09436	-1.76164	0.844761	-0.621218
26.6	-0.00173444	-0.00654764	-0.000990702	-0.006092	-0.00442207	-4.58263e-05	2.37627e-06	0.00013559	1.37598e-05	-0.000118702	2.59025	-2.95878	-0.0518538	1	2.80956		-3.0706	-0.0528177	1	0.686134	4.09476	-4.47522	-0.0769787	1.45744	1	-0.678212	-4.98957	5.35372	0.824689	-0.931981		-0.931981
26.8	-0.00147535	-0.00659094	-0.0012222	-0.00597752	-0.0042875	0.000213264	-4.09257e-05	-9.59056e-05	0.000128239	1.58643e-05	0.0743882	-0.449704	-0.191902	1	0.0806864		-0.466701	-0.195469	1	0.418516	0.192791	-1.11513	-0.467053	2.38939	1	-2.36858	-1.46537	0.231175	2.89339	-6.33877		-6.33877
27	-0.00157053	-0.00665179	-0.00124935	-0.00604419	-0.00439191	0.000118092	-0.00010177	-0.000123057	6.15638e-05	-8.85417e-05	-0.749771	-1.04204	-0.861786	1	-0.81325		-1.08143	-0.877806	1	-1.77248	0.45882	0.61012	0.495241	-0.56418	1	1.92041	0.689361	0.606619	-0.830444	1.1364
27.2	-0.00169717	-0.00655475	-0.00101231	-0.00617237	-0.0042567	-8.55331e-06	-4.72873e-06	0.000113986	-6.66122e-05	4.66643e-05	-5.4557	-13.3266	0.552854	1	-5.91761		-13.8302	0.563131	1	-18.1847	0.325417	0.760542	-0.0309673	-0.0549912	1	-0.124928	0.787618	0.427237	-0.180104	1.84351
27.4	-0.0018717	-0.00650277	-0.00100117	-0.00617676	-0.00422826	-0.000183086	4.72493e-05	0.000125117	-7.10022e-05	7.51103e-05	-0.410245	-0.683379	-0.258071	1	-0.444979		-0.709207	-0.262868	1	-0.417054	1.06696	1.70051	0.630298	-2.39777	1	2.91078	2.03139	1.4204	-3.2619	1.43016
27.6	-0.001915	-0.00686448	-0.00118647	-0.00639861	-0.00438848	-0.000226378	-0.000314464	-6.01826e-05	-0.000292852	-8.51167e-05	0.375993	0.26585	1.38911	1	0.407827		0.275897	1.41493	1	3.09865	0.131614	0.0890378	0.456627	0.322721	1	1.53795	0.0480062	0.169672	0.354311	0.282936		0.282936
27.8	-0.00156779	-0.00632375	-0.000889426	-0.00598155	-0.00448742	0.000120828	0.000226268	0.000236866	0.00012421	-0.000184057	-1.5233	1.96037	1.87265	1	-1.65227	-1.43146	2.03446	1.90746	1	3.28965	-0.502263	0.618441	0.579838	0.303984	1	1.98545	0.624504	-0.660976	0.48391	-0.944821			-2.32927
28	-0.00169366	-0.00656659	-0.00100445	-0.00619589	-0.00425961	-5.04631e-06	-1.65747e-05	0.000121841	-9.01282e-05	4.37593e-05	-8.67154	-24.1446	3.28452	1	-9.40572		-25.0572	3.34558	1	-30.1173	0.312303	0.831986	-0.111085	-0.0332035	1	-0.42118	0.859816	0.409869	-0.152488	2.09778
28.2	-0.0018024	-0.00664089	-0.0012377	-0.00623499	-0.00444171	-0.000113777	-9.08717e-05	-0.00011141	-0.000129227	-0.000138344	1.21592	0.97919	0.798681	1	1.31886		1.0162	0.813528	1	4.14859	0.317906	0.24495	0.196097	0.241046	1	0.61738	0.213947	0.414639	0.199592	0.515984		0.515984
28.4	-0.0018032	-0.00670898	-0.00112471	-0.00598461	-0.00420519	-0.000114585	-0.000158966	1.57937e-06	0.000121152	9.81773e-05	-0.856805	-0.0137834	1.38731	1	-0.929347		-0.0143043	1.4131	1	1.46945	-0.632445	-0.00973445	0.961653	0.680526	1	3.2658	-0.0720883	-0.835123	0.99834	0.0863205
28.6	-0.0016164	-0.0065033	-0.00113955	-0.00604062	-0.00447133	7.22207e-05	4.67213e-05	-1.32526e-05	6.51408e-05	-0.000167964	-2.3257	-0.183502	0.646924	1	-2.52261		-0.190437	0.65895	1	-1.05409	2.39315	0.180664	-0.625133	-0.948682	1	-2.02225	0.220701	3.14561	-1.80352	0.0701617
28.8	-0.00178315	-0.00648627	-0.00103525	-0.00617715	-0.00430488	-9.45363e-05	6.37453e-05	9.10404e-05	-7.13912e-05	-1.51769e-06	0.016054	-0.96302	-0.674294	1	0.0174133		-0.999417	-0.686829	1	-0.668832	-0.0260353	1.49427	1.02691	-1.49514	1	4.09604	1.74341	-0.0204685	-1.8629	-85.1754		-85.1754
29	-0.0017191	-0.00651262	-0.0013912	-0.00607092	-0.00423921	-3.04793e-05	3.73933e-05	-0.000264913	3.48358e-05	6.41593e-05	-2.10501	8.69156	-1.22684	1	-2.28323		9.02005	-1.24965	1	6.48717	-0.351962	1.39044	-0.192634	0.154151	1	-0.771591	1.44208	-0.462444	0.235067	-3.1184
29.2	-0.00176736	-0.00671367	-0.00125211	-0.0061804	-0.00436014	-7.87423e-05	-0.000163656	-0.000125816	-7.46432e-05	-5.67757e-05	0.721032	1.59781	2.07837	1	0.782078		1.6582	2.11701	1	5.55729	0.14073	0.298383	0.380942	0.179944	1	1.30252	0.283521	0.182941	0.171041	1.5498		1.5498
29.4	-0.00177813	-0.00640304	-0.000945272	-0.00613445	-0.00402243	-8.95113e-05	0.000146981	0.000181021	-2.86962e-05	0.000280933	-3.13852	-2.02232	-1.64204	1	-3.40425		-2.09875	-1.67257	1	-6.17557	0.551244	0.339848	0.270836	-0.161928	1	0.998898	0.354533	0.724129	-0.356662	0.489599
29.6	-0.00178079	-0.00671681	-0.00126269	-0.00607544	-0.00447905	-9.21753e-05	-0.000166793	-0.000136394	3.03188e-05	-0.000175679	1.90592	1.47972	1.80952	1	2.06728		1.53564	1.84315	1	6.44608	0.320704	0.238229	0.285934	0.155133	1	0.966168	0.217512	0.419071	0.0945284	0.519033		0.519033
29.8	-0.00156319	-0.00662102	-0.00107265	-0.00603422	-0.00434062	0.000125428	-7.10067e-05	5.36444e-05	7.15368e-05	-3.72567e-05	-0.297037	0.427692	-0.566117	1	-0.322186	-1.46817	0.443856	-0.576641	1	0.545029	-0.591135	0.814371	-1.058	1.83476	1	-4.36403	0.641748	-0.791081	2.36383	-0.81123			-20.6476
30	-0.00170169	-0.00646814	-0.0010857	-0.0060716	-0.00441713	-1.30733e-05	8.18773e-05	4.05904e-05	3.41538e-05	-0.000113763	8.7019	-3.10483	-6.26293	1	9.43865		-3.22217	-6.37936	1	0.837124	11.2751	-3.8491	-7.62056	1.19457	1	-27.8919	-4.56056	14.7687	-1.44574	-0.308799		-0.308799
30.2	-0.0015507	-0.00656966	-0.00124362	-0.00618835	-0.00432238	0.000137918	-1.96447e-05	-0.000117324	-8.25882e-05	-1.90177e-05	-0.137892	-0.850679	-0.142438	1	-0.149566		-0.882829	-0.145086	1	-0.177482	0.842714	4.9742	0.817471	-5.63439	1	4.46526	5.85202	1.15602	-7.25084	5.0622
30.4	-0.00173769	-0.00648366	-0.00110574	-0.00623672	-0.0043477	-4.90733e-05	6.63583e-05	2.05494e-05	-0.000130957	-4.43297e-05	0.903336	-0.418748	-1.35223	1	0.979817		-0.434575	-1.37736	1	0.167878	5.83648	-2.58863	-8.20455	5.9567	1	-31.3331	-3.64468	7.59719	5.76757	-0.47974		-0.47974
30.6	-0.00166056	-0.00673525	-0.00121779	-0.00606069	-0.00440115	2.80597e-05	-0.000185229	-9.14996e-05	4.50718e-05	-9.77857e-05	-3.48492	-3.26089	-6.60124	1	-3.77997		-3.38414	-6.72395	1	-12.8881	0.293292	0.262579	0.52172	-0.0775912	1	1.88335	0.272753	0.385218	-0.182112	0.708048
30.8	-0.00176169	-0.00643499	-0.00105553	-0.00596005	-0.00417696	-7.30733e-05	0.000115026	7.07624e-05	0.000145711	0.000126406	-1.72986	-0.968375	-1.57412	1	-1.87632		-1.00497	-1.60338	1	-3.48467	0.538448	0.288398	0.460125	-0.286971	1	1.71851	0.31691	0.708458	-0.503635	0.447324
31	-0.00161334	-0.00647851	-0.00115618	-0.00631216	-0.00438161	7.52777e-05	7.15093e-05	-2.98926e-05	-0.000206405	-7.82407e-05	-1.03936	-0.397098	0.94994	1	-1.12736		-0.412106	0.967599	1	0.428134	-2.63319	-0.962564	2.26004	2.33572	1	7.50836	-1.199	-3.47281	3.58226	0.345253
31.2	-0.00179874	-0.00645828	-0.00123317	-0.00597891	-0.00429169	-0.00011012	9.17403e-05	-0.000106879	0.000126844	1.16773e-05	-0.106041	0.970562	-0.833091	1	-0.115019		1.00724	-0.848578	1	1.04365	-0.110209	0.96512	-0.813089	0.958179	1	-3.236	0.8905	-0.1528	1.16286	-5.82789
31.4	-0.00189134	-0.0066959	-0.00108278	-0.00603607	-0.00428395	-0.000202717	-0.000145884	4.35114e-05	6.96848e-05	1.94143e-05	-0.0957704	-0.214641	0.719641	1	-0.103879		-0.222753	0.733019	1	1.40639	-0.0738622	-0.158387	0.521207	0.711042	1	1.66532	-0.250668	-0.103198	0.890413	2.42899
31.6	-0.00168283	-0.00642439	-0.00102177	-0.00609653	-0.00424458	5.79069e-06	0.000125626	0.000104522	9.23376e-06	5.87833e-05	10.1514	18.0501	21.6945	1	11.0108		18.7323	22.0978	1	52.8409	0.208377	0.354503	0.418195	0.0189247	1	1.48158	0.359571	0.273065	-0.0449658	1.3168		1.3168
31.8	-0.00119309	-0.00627842	-0.00116697	-0.00629618	-0.00441626	0.000495525	0.000271593	-4.06726e-05	-0.000190419	-0.000112898	-0.227835	-0.0820799	0.548092	1	-0.247124	1.40301	-0.0851821	0.558281	1	1.22597	-0.201574	-0.0694811	0.455377	0.815678	1	1.39764	-0.166477	-0.271525	1.04904	0.61312			0.176086
32	0.0109544	-0.0055789	0.000358049	-0.00610674	-0.00406536	0.0126431	0.000971122	0.00148434	-9.84244e-07	0.000238006	0.018825	0.117404	0.0768107	1	0.0204189		0.121841	0.0782385	1	1.2205	0.01673	0.0998287	0.0641038	0.819338	1	-0.0195394	0.00168575	0.0146478	0.989104	0.115086		0.115086
32.2	0.0183653	-0.00494938	0.00129988	-0.00607011	-0.00428759	0.020054	0.00160064	0.00242617	3.56538e-05	1.57783e-05	0.000786793	0.120982	0.0798164	1	0.000853407		0.125555	0.0813002	1	1.20771	0.000706633	0.103961	0.0673177	0.828015	1	-0.0103489	0.00548504	-0.00643313	1.00383	-0.852623
32.4	0.0153803	-0.00517535	0.000641299	-0.00617897	-0.00427591	0.0170689	0.00137467	0.00176759	-7.32072e-05	2.74603e-05	0.00160879	0.103556	0.0805365	1	0.001745		0.10747	0.0820337	1	1.19125	0.00146485	0.0902164	0.0688636	0.839455	1	-0.00784624	-0.0102826	-0.00554424	1.01801	1.85465
32.6	0.024416	-0.00437908	0.00201872	-0.00608479	-0.004044	0.0261047	0.00217094	0.00314501	2.09688e-05	0.000259368	0.00993571	0.120477	0.083163	1	0.0107769		0.12503	0.0847089	1	1.22052	0.00882981	0.102441	0.0694042	0.819325	1	-0.000382465	0.00469011	0.00429243	0.991124	1.09265		1.09265
32.8	0.0474664	-0.0021166	0.00454384	-0.00601983	-0.00409485	0.049155	0.00443342	0.00567013	8.59318e-05	0.000208515	0.004242	0.115352	0.0901926	1	0.00460115		0.119712	0.0918693	1	1.21618	0.00378327	0.0984324	0.0755391	0.822245	1	0.0210204	0.000331479	-0.00234984	0.996168	-0.141064
33	0.0751488	-0.000159744	0.00785002	-0.00604416	-0.00392992	0.0768374	0.00639027	0.00897631	6.15948e-05	0.000373446	0.00486021	0.116822	0.0831662	1	0.00527171		0.121237	0.0847122	1	1.21122	0.00435239	0.100095	0.0699395	0.825613	1	-0.000176326	0.0016254	-0.00163346	1.00006	-0.995063
33.2	0.112636	0.003075	0.0124502	-0.00599828	-0.00337573	0.114325	0.00962502	0.0135765	0.000107479	0.000927639	0.00811409	0.118754	0.0841903	1	0.00880107		0.123242	0.0857554	1	1.2178	0.00722703	0.101201	0.0704184	0.821154	1	0.00278594	0.00322842	0.00217483	0.993821	1.48445		1.48445
33.4	0.156698	0.00675271	0.0173747	-0.00597823	-0.00341498	0.158387	0.0133027	0.018501	0.00012753	0.000888382	0.00560895	0.116809	0.083989	1	0.00608384		0.121224	0.0855503	1	1.21286	0.00501611	0.099949	0.0705361	0.824499	1	0.00229157	0.00158789	-0.000753498	0.998528	-2.10735
33.6	0.209931	0.0112201	0.0236819	-0.00618727	-0.00302211	0.21162	0.0177702	0.0248082	-8.15092e-05	0.00128126	0.00605453	0.11723	0.083972	1	0.00656714		0.12166	0.085533	1	1.21376	0.00541057	0.100234	0.0704694	0.823886	1	0.00221853	0.00194722	-0.000230887	0.997666	-8.43363
33.8	0.261949	0.0156159	0.0294254	-0.00611258	-0.00269897	0.263638	0.0221659	0.0305517	-6.82424e-06	0.0016044	0.00608562	0.115885	0.0840771	1	0.00660086	0.007172	0.120265	0.08564	1	1.21251	0.00544398	0.0991869	0.0706306	0.824738	1	0.00257167	0.000748835	-0.000194924	0.99873	-3.84167			0.897393
34	0.333941	0.0216077	0.0378941	-0.00599391	-0.00207995	0.33563	0.0281577	0.0390204	0.000111852	0.00222342	0.00662461	0.11626	0.0838951	1	0.00718549		0.120654	0.0854547	1	1.21329	0.00592229	0.0994436	0.0704319	0.824202	1	0.00200023	0.00106582	0.000436919	0.997941	2.43939		2.43939
34.2	0.385346	0.0256093	0.0436665	-0.00601403	-0.00200364	0.387034	0.0321593	0.0447928	9.17328e-05	0.00229973	0.00594192	0.115733	0.0830915	1	0.00644499		0.120107	0.0846361	1	1.21119	0.00532121	0.0991649	0.0698786	0.825635	1	-0.000396998	0.000618962	-0.000363861	0.999855	-1.70109
34.4	0.419422	0.0284446	0.0476838	-0.00593885	-0.0014707	0.42111	0.0349946	0.0488101	0.000166905	0.00283266	0.00672665	0.115908	0.0831008	1	0.00729617		0.120289	0.0846456	1	1.21223	0.00601879	0.0992294	0.0698263	0.824926	1	-0.000389427	0.000749357	0.00055692	0.998802	1.34554		1.34554
34.6	0.468482	0.0326285	0.0531183	-0.0059743	-0.00127333	0.470171	0.0391785	0.0542446	0.000131456	0.00303003	0.00644454	0.115372	0.0833283	1	0.00699017		0.119732	0.0848774	1	1.2116	0.00576937	0.0988218	0.0700539	0.825355	1	0.000317196	0.000280301	0.000226041	0.999405	1.24005		1.24005
34.8	0.509288	0.0361851	0.0579273	-0.00608961	-0.000975005	0.510976	0.0427351	0.0590536	1.61488e-05	0.00332836	0.00651373	0.11557	0.0836342	1	0.00706522		0.119938	0.0851889	1	1.21219	0.00582846	0.098943	0.0702768	0.824952	1	0.00123414	0.000454546	0.000307123	0.998895	1.48001		1.48001
35	0.65346	0.0480652	0.0753426	-0.00597954	-0.000306958	0.655148	0.0546153	0.0764689	0.000126216	0.00399641	0.00610001	0.11672	0.0833632	1	0.00661647		0.121131	0.0849129	1	1.21266	0.00545616	0.0998889	0.070022	0.824633	1	0.000395243	0.00149289	-0.000177872	0.998575	-8.39305
35.2	0.727529	0.0542687	0.0830928	-0.00577532	0.00029102	0.729218	0.0608187	0.0842191	0.000330439	0.00459439	0.00630043	0.115492	0.0834027	1	0.00683386		0.119857	0.0849531	1	1.21164	0.00564015	0.0989212	0.0701139	0.825325	1	0.000541787	0.000392236	5.6946e-05	0.9994	6.88785
35.4	0.747585	0.0556031	0.0852719	-0.00597587	0.000438039	0.749274	0.0621531	0.0863982	0.000129892	0.00474141	0.006328	0.115309	0.0829512	1	0.00686377		0.119667	0.0844932	1	1.21102	0.00566774	0.098815	0.06977	0.825747	1	-0.000818408	0.000228134	8.93109e-05	0.99991	2.55439
35.6	0.751828	0.0560085	0.0856486	-0.00598102	0.00052357	0.753517	0.0625585	0.0867749	0.000124743	0.00482694	0.00640588	0.11516	0.0830221	1	0.00694823		0.119512	0.0845654	1	1.21103	0.00573748	0.0986867	0.0698296	0.825746	1	-0.000601957	9.21407e-05	0.000180714	0.999895	0.509871		0.509871
35.8	0.82653	0.0624069	0.0946466	-0.00586401	0.000811581	0.828219	0.0689569	0.0957729	0.000241752	0.00511495	0.00617584	0.115637	0.0832594	1	0.00669872	0.00689431	0.120008	0.0848071	1	1.21151	0.00552922	0.099056	0.070001	0.825414	1	0.000107759	0.000525567	-8.9241e-05	0.999534	-5.8893			1.40297
36	0.862518	0.0652806	0.098656	-0.00582335	0.000978664	0.864206	0.0718306	0.0997823	0.00028241	0.00528203	0.006112	0.115461	0.0831174	1	0.00662948		0.119825	0.0846626	1	1.21112	0.00547385	0.0989376	0.0699045	0.825684	1	-0.000315263	0.000370621	-0.000164253	0.999881	-2.25641
36.2	0.935778	0.0711948	0.107173	-0.00598821	0.00157467	0.937466	0.0777448	0.108299	0.000117552	0.00587803	0.00627013	0.115524	0.0829308	1	0.00680099		0.11989	0.0844724	1	1.21116	0.00561525	0.0989873	0.0697449	0.825653	1	-0.000884235	0.000421246	2.13964e-05	0.999803	19.6877
36.4	0.968308	0.0745526	0.110617	-0.00580335	0.00182548	0.969997	0.0811026	0.111743	0.000302411	0.00612885	0.00631842	0.1152	0.0836112	1	0.00685337		0.119554	0.0851655	1	1.21157	0.00565659	0.0986764	0.0702934	0.825374	1	0.0011789	0.000130468	7.80062e-05	0.999463	1.67253
36.6	0.963935	0.0738976	0.110111	-0.00587381	0.00191228	0.965624	0.0804476	0.111237	0.00023195	0.00621565	0.00643693	0.115197	0.0833116	1	0.00698191		0.119551	0.0848603	1	1.21139	0.00576354	0.0986886	0.0700518	0.825496	1	0.0002712	0.000124251	0.000217108	0.999583	0.572298		0.572298
36.8	0.947459	0.0723729	0.108305	-0.00590559	0.00169592	0.949147	0.078923	0.109432	0.000200173	0.00599929	0.00632072	0.115295	0.0831514	1	0.00685586		0.119652	0.0846972	1	1.21121	0.00566036	0.0987877	0.069928	0.825624	1	-0.000212632	0.000215218	8.07395e-05	0.999763	2.66559
37	0.957701	0.0730783	0.109349	-0.0059276	0.00173238	0.959389	0.0796283	0.110475	0.000178157	0.00603575	0.00629124	0.115151	0.082999	1	0.00682389		0.119503	0.0845419	1	1.21087	0.00563553	0.0986922	0.0698192	0.825853	1	-0.000669343	8.81853e-05	4.6121e-05	1.00005	1.91204
37.2	0.985524	0.0756927	0.112818	-0.00568277	0.00200289	0.987212	0.0822427	0.113944	0.000422993	0.00630626	0.00638794	0.11542	0.0833081	1	0.00692878		0.119782	0.0848567	1	1.21157	0.00571886	0.0988656	0.0700388	0.825377	1	0.000255976	0.000325023	0.000159636	0.999444	2.03602
37.4	0.98543	0.0753723	0.112436	-0.00592351	0.00186079	0.987119	0.0819223	0.113563	0.000182249	0.00616416	0.00624459	0.115045	0.0829913	1	0.0067733		0.119393	0.0845341	1	1.2107	0.00559453	0.0986146	0.0698225	0.825968	1	-0.000688866	-5.47913e-06	-8.67153e-06	1.00021	0.631853
37.6	1.03313	0.0799249	0.118439	-0.0057718	0.00226503	1.03482	0.0864749	0.119565	0.000333954	0.0065684	0.00634741	0.115542	0.0835655	1	0.00688481		0.119909	0.085119	1	1.21191	0.00568095	0.098942	0.0702352	0.825142	1	0.00103116	0.000435209	0.000112056	0.999166	3.88384
37.8	1.08408	0.0835309	0.124267	-0.00570884	0.00252679	1.08577	0.0900809	0.125393	0.000396921	0.00683015	0.00629059	0.115488	0.0829648	1	0.00682319	0.00683556	0.119852	0.084507	1	1.21118	0.00563349	0.0989548	0.0697723	0.825639	1	-0.000781024	0.000388372	4.54133e-05	0.999784	8.55196			0.572298
38	1.10735	0.0858117	0.126684	-0.00575493	0.00262991	1.10904	0.0923617	0.12781	0.000350829	0.00693328	0.00625163	0.115245	0.0832811	1	0.00678093		0.1196	0.0848293	1	1.21121	0.00559847	0.0987443	0.0700368	0.82562	1	0.000182014	0.000172687	-3.71563e-07	0.999777	-464.76
38.2	1.10835	0.0856991	0.126809	-0.00586516	0.00261853	1.11004	0.0922491	0.127935	0.000240596	0.0069219	0.00623575	0.115253	0.0831047	1	0.0067637		0.119609	0.0846496	1	1.21102	0.00558512	0.0987669	0.0698993	0.825749	1	-0.000351161	0.000180746	-1.90181e-05	0.999936	-9.5039
38.4	1.12007	0.086677	0.128243	-0.00564806	0.00286179	1.12176	0.093227	0.129369	0.000457702	0.00716516	0.00638742	0.115327	0.0831078	1	0.00692822		0.119686	0.0846528	1	1.21127	0.00571981	0.0988105	0.0698878	0.825582	1	-0.000346568	0.000242135	0.000159049	0.999695	1.52239
38.6	1.09883	0.0846565	0.125469	-0.0057742	0.00243832	1.10052	0.0912065	0.126596	0.000331564	0.00674169	0.00612594	0.115033	0.0828762	1	0.00664459		0.119381	0.0844168	1	1.21044	0.00548939	0.0986257	0.0697405	0.826144	1	-0.00103428	-1.20804e-05	-0.000148057	1.00045	0.0815928
38.8	1.12475	0.087041	0.128852	-0.00594221	0.00284373	1.12644	0.093591	0.129978	0.000163549	0.0071471	0.00634486	0.115388	0.0830857	1	0.00688205		0.119749	0.0846302	1	1.21126	0.00568172	0.0988633	0.0698695	0.825586	1	-0.000414171	0.000297992	0.000109094	0.999708	2.73153
39	1.18145	0.0917561	0.135333	-0.00586888	0.00315497	1.18314	0.0983061	0.136459	0.000236882	0.00745834	0.00630388	0.115337	0.0830894	1	0.0068376		0.119696	0.084634	1	1.21117	0.00564546	0.0988269	0.0698781	0.82565	1	-0.000400713	0.000253483	6.09805e-05	0.999797	4.15678
39.2	1.21852	0.0950226	0.139461	-0.00589005	0.00334504	1.22021	0.101573	0.140587	0.000215712	0.00764841	0.0062681	0.115216	0.0832418	1	0.00679879		0.11957	0.0847893	1	1.21116	0.00561347	0.0987239	0.0700068	0.825656	1	6.36808e-05	0.000146481	1.89632e-05	0.999817	7.72445
39.4	1.23024	0.0959033	0.140983	-0.0059313	0.00333892	1.23193	0.102453	0.142109	0.000174462	0.00764228	0.00620351	0.115355	0.083165	1	0.00672873		0.119715	0.084711	1	1.21115	0.00555564	0.0988437	0.0699424	0.825658	1	-0.000170684	0.000273043	-5.68391e-05	0.999831	-4.80379
39.6	1.20636	0.0937433	0.13832	-0.00597322	0.00327078	1.20805	0.100293	0.139446	0.00013254	0.00757414	0.00626973	0.115431	0.0830209	1	0.00680056		0.119793	0.0845642	1	1.21116	0.00561493	0.0989081	0.069821	0.825656	1	-0.000609503	0.000338312	2.0917e-05	0.99981	16.174
39.8	1.28458	0.100436	0.147262	-0.00580531	0.00368252	1.28627	0.106986	0.148388	0.000300447	0.00798589	0.00620857	0.115363	0.0831756	1	0.00673422	0.00678994	0.119723	0.0847218	1	1.21118	0.00556006	0.0988486	0.0699499	0.825641	1	-0.000138934	0.000280103	-5.08946e-05	0.999809	-5.5036			#DIV/0!
40	1.28019	0.100205	0.146839	-0.00576187	0.00401918	1.28188	0.106755	0.147965	0.000343886	0.00832254	0.00649246	0.115428	0.0832804	1	0.00704215		0.119791	0.0848286	1	1.21166	0.00581198	0.0988649	0.0700101	0.825313	1	0.000170082	0.000328952	0.000282276	0.999341	1.16536		1.16536
40.2	1.31291	0.102832	0.150515	-0.00586631	0.00403679	1.31459	0.109382	0.151641	0.000239453	0.00834015	0.00634428	0.115352	0.0832059	1	0.00688142		0.119712	0.0847527	1	1.21135	0.0056808	0.0988254	0.0699657	0.825528	1	-5.00378e-05	0.000265754	0.000108397	0.99964	2.45167
40.4	1.3263	0.103632	0.152019	-0.00569928	0.00405492	1.32799	0.110182	0.153145	0.000406483	0.00835829	0.00629393	0.115321	0.0829688	1	0.00682681		0.11968	0.0845111	1	1.21102	0.00563725	0.0988257	0.0697852	0.825752	1	-0.000764887	0.000239752	4.93093e-05	0.999924	4.86221
40.6	1.32516	0.104149	0.151851	-0.00588724	0.0040358	1.32685	0.110699	0.152977	0.000218516	0.00833917	0.00628495	0.115294	0.0834302	1	0.00681707		0.119651	0.0849811	1	1.21145	0.0056272	0.0987668	0.0701483	0.825458	1	0.000630243	0.000215362	3.87501e-05	0.99957	5.55772
40.8	1.28136	0.0999112	0.146435	-0.00565817	0.00374081	1.28304	0.106461	0.147562	0.000447589	0.00804417	0.0062696	0.115009	0.0829755	1	0.00680042		0.119356	0.0845179	1	1.21067	0.00561705	0.0985862	0.0698106	0.825986	1	-0.000736373	-3.8086e-05	2.06873e-05	1.00022	-1.84103
41	1.24981	0.0976251	0.143116	-0.00583594	0.00360598	1.2515	0.104175	0.144242	0.00026982	0.00790935	0.0063199	0.115255	0.0832402	1	0.00685498		0.119611	0.0847876	1	1.21125	0.0056594	0.09875	0.0699999	0.825591	1	5.65988e-05	0.000180133	7.97698e-05	0.999724	2.25816
41.2	1.25276	0.0975708	0.143539	-0.00588703	0.0037048	1.25445	0.104121	0.144665	0.000218729	0.00800817	0.0063838	0.115322	0.0830011	1	0.00692429		0.11968	0.084544	1	1.21115	0.00571712	0.0988154	0.0698048	0.825663	1	-0.00066906	0.000237295	0.000154806	0.999794	1.53285
41.4	1.26419	0.0988614	0.144967	-0.00572326	0.00355402	1.26587	0.105411	0.146093	0.000382503	0.00785738	0.00620708	0.115409	0.0832716	1	0.0067326		0.119771	0.0848196	1	1.21132	0.00555806	0.0988759	0.0700223	0.825544	1	0.000149967	0.000320737	-5.2633e-05	0.99969	-6.09384
41.6	1.26825	0.0989712	0.145102	-0.00581483	0.00390815	1.26993	0.105521	0.146229	0.000290934	0.00821152	0.0064661	0.115147	0.0830919	1	0.00701356		0.119499	0.0846366	1	1.21115	0.00579083	0.0986654	0.0698812	0.825662	1	-0.000391758	7.84566e-05	0.000251394	0.999779	0.312087		0.312087
41.8	1.25873	0.0982028	0.144296	-0.00575876	0.00367272	1.26042	0.104753	0.145423	0.000346994	0.00797609	0.00632814	0.115377	0.0831097	1	0.00686391	0.00687572	0.119737	0.0846546	1	1.21126	0.00566677	0.0988539	0.06989	0.825589	1	-0.00034111	0.000288278	8.94631e-05	0.999717	3.22231			0.738722
42	1.31689	0.103166	0.151025	-0.00575455	0.00406354	1.31858	0.109716	0.152151	0.000351213	0.0083669	0.00634539	0.11539	0.0832079	1	0.00688262		0.119751	0.0847547	1	1.21139	0.0056816	0.0988547	0.0699649	0.825499	1	-4.49792e-05	0.00029983	0.000109703	0.999603	2.73312
42.2	1.30785	0.102353	0.149692	-0.00591483	0.00397243	1.30954	0.108903	0.150818	0.000190931	0.0082758	0.0063196	0.115169	0.0831613	1	0.00685466		0.119521	0.0847072	1	1.21108	0.00565994	0.0986897	0.0699433	0.825707	1	-0.000179702	0.000102869	7.94202e-05	0.999868	1.29526
42.4	1.34689	0.105645	0.154504	-0.00588236	0.00429072	1.34858	0.112195	0.155631	0.000223395	0.00859409	0.00637272	0.115404	0.0831951	1	0.00691227		0.119765	0.0847417	1	1.21142	0.00570592	0.0988637	0.0699524	0.825478	1	-8.44728e-05	0.000310907	0.000141781	0.999571	2.19287
42.6	1.36634	0.107335	0.156889	-0.00572021	0.00418128	1.36802	0.113885	0.158015	0.000385552	0.00848464	0.00620211	0.115506	0.0832476	1	0.00672722		0.119872	0.0847952	1	1.21139	0.00555329	0.0989535	0.069998	0.825495	1	7.51556e-05	0.000407841	-5.84407e-05	0.99963	-6.97872
42.8	1.39204	0.109302	0.159574	-0.00579785	0.00459605	1.39373	0.115852	0.1607	0.000307908	0.00889941	0.0063853	0.115302	0.0831237	1	0.00692592		0.11966	0.0846689	1	1.21125	0.00571797	0.0987899	0.0699019	0.82559	1	-0.000297936	0.00021966	0.000156556	0.999707	1.40308
43	1.39016	0.109121	0.159148	-0.00589304	0.00454789	1.39185	0.115672	0.160274	0.000212717	0.00885126	0.00635937	0.115152	0.0831066	1	0.00689779		0.119504	0.0846515	1	1.21105	0.00569569	0.098678	0.069899	0.825727	1	-0.000345448	8.69013e-05	0.000126103	0.999883	0.689128
43.2	1.38508	0.108671	0.158639	-0.00577436	0.00448168	1.38677	0.115221	0.159766	0.000331402	0.00878505	0.0063349	0.115207	0.0830858	1	0.00687125		0.119561	0.0846304	1	1.21106	0.00567374	0.0987242	0.0698811	0.825721	1	-0.00040902	0.000136629	9.7391e-05	0.99988	1.4029
43.4	1.34435	0.105145	0.153713	-0.00568081	0.00433647	1.34604	0.111695	0.154839	0.000424949	0.00863984	0.00641872	0.115033	0.0829803	1	0.00696217		0.119381	0.0845229	1	1.21087	0.00574974	0.0985914	0.0698036	0.825855	1	-0.00072541	-2.11175e-05	0.000195798	1.00003	-0.107853		-0.107853
43.6	1.31764	0.103198	0.151034	-0.0059813	0.00402128	1.31933	0.109748	0.15216	0.000124463	0.00832465	0.00630977	0.115332	0.0831851	1	0.00684399		0.119691	0.0847315	1	1.21127	0.00565028	0.0988144	0.0699528	0.825582	1	-0.000111583	0.000248631	6.78911e-05	0.999715	3.6622
43.8	1.30393	0.102139	0.149369	-0.00570748	0.00416849	1.30562	0.108689	0.150495	0.000398281	0.00847185	0.00648876	0.115267	0.0832471	1	0.00703814	0.0068916	0.119624	0.0847946	1	1.21146	0.00580965	0.0987436	0.0699939	0.825453	1	7.3489e-05	0.000185239	0.000277953	0.999516	0.666438		0.666438	0.279292
44	1.3143	0.102804	0.150572	-0.00585103	0.00381082	1.31599	0.109354	0.151698	0.000254725	0.00811419	0.00616585	0.115273	0.0830965	1	0.00668788		0.11963	0.0846412	1	1.21096	0.0055228	0.0987893	0.069896	0.825792	1	-0.000374998	0.000200972	-0.000101084	1	-1.98816
44.2	1.30072	0.101888	0.149067	-0.00565641	0.00392583	1.30241	0.108438	0.150194	0.000449346	0.0082292	0.00631842	0.11532	0.083259	1	0.00685338		0.119678	0.0848067	1	1.21134	0.00565769	0.0987981	0.0700108	0.825533	1	0.000111673	0.000237467	7.80469e-05	0.999653	3.04262
44.4	1.28526	0.100613	0.147187	-0.00578012	0.00386016	1.28695	0.107163	0.148313	0.000325642	0.00816353	0.0063433	0.115244	0.0832687	1	0.00688036		0.119599	0.0848166	1	1.2113	0.00568016	0.0987365	0.0700213	0.825562	1	0.000142394	0.000168943	0.000107238	0.999684	1.5754
44.6	1.30459	0.101942	0.149636	-0.00575862	0.00376754	1.30628	0.108492	0.150763	0.000347139	0.0080709	0.00617853	0.115414	0.0830542	1	0.00670164		0.119776	0.0845982	1	1.21108	0.00553363	0.0989001	0.0698538	0.825712	1	-0.000506468	0.000325935	-8.61593e-05	0.999901	-3.78294
44.8	1.37036	0.107822	0.157402	-0.00560388	0.00451123	1.37205	0.114372	0.158528	0.000501878	0.0088146	0.0064244	0.115541	0.0833587	1	0.00696833		0.119908	0.0849083	1	1.21178	0.00575047	0.0989515	0.0700688	0.825229	1	0.000404911	0.000431759	0.00020241	0.999253	2.13309		2.13309
45	1.32325	0.103515	0.151356	-0.00562374	0.00407577	1.32493	0.110065	0.152482	0.000482022	0.00837913	0.00632419	0.115086	0.083072	1	0.00685963		0.119436	0.0846163	1	1.21091	0.00566484	0.0986331	0.0698782	0.825824	1	-0.000447455	2.9169e-05	8.47953e-05	1.00001	0.343994
45.2	1.35395	0.106416	0.155268	-0.00541965	0.00430916	1.35564	0.112966	0.156394	0.000686106	0.00861253	0.00635312	0.115366	0.0833302	1	0.00689101		0.119726	0.0848793	1	1.2115	0.00568802	0.0988248	0.0700616	0.825426	1	0.000325126	0.000277554	0.000118765	0.999513	2.33701
45.4	1.32212	0.103789	0.151228	-0.00529993	0.00412631	1.32381	0.110339	0.152354	0.000805829	0.00842968	0.00636774	0.115088	0.0833497	1	0.00690686		0.119437	0.0848991	1	1.21124	0.00570229	0.0986073	0.0700925	0.825598	1	0.000390738	2.9023e-05	0.000135894	0.999726	0.213571
45.6	1.29726	0.101503	0.14863	-0.0050841	0.00390255	1.29895	0.108053	0.149756	0.00102166	0.00820592	0.00631734	0.11529	0.0831849	1	0.0068522		0.119648	0.0847313	1	1.21123	0.00565722	0.0987818	0.0699547	0.825606	1	-0.000111203	0.000211422	7.67768e-05	0.999743	2.75372
45.8	1.30317	0.102315	0.149223	-0.00501474	0.00410173	1.30486	0.108865	0.150349	0.00109102	0.0084051	0.00644139	0.115222	0.0834308	1	0.00698675	0.0068588	0.119577	0.0849818	1	1.21155	0.00576681	0.098698	0.0701433	0.825392	1	0.000630718	0.000146796	0.000222324	0.999455	0.660281		0.660281	1.39669
46	1.24419	0.0970944	0.142377	-0.00505186	0.00356312	1.24588	0.103644	0.143503	0.0010539	0.00786649	0.00631398	0.115182	0.0831895	1	0.00684856		0.119535	0.084736	1	1.21112	0.00565473	0.098698	0.069965	0.825682	1	-9.46112e-05	0.000114756	7.28186e-05	0.999839	1.57592
46.2	1.23116	0.0963536	0.141069	-0.00501017	0.00355152	1.23285	0.102904	0.142196	0.00109559	0.00785489	0.00637132	0.115339	0.083468	1	0.00691075		0.119698	0.0850196	1	1.21163	0.00570368	0.0987911	0.0701697	0.825336	1	0.000741432	0.000253052	0.0001401	0.999401	1.80622
46.4	1.2499	0.0979214	0.143166	-0.00486253	0.00358038	1.25159	0.104471	0.144292	0.00124323	0.00788375	0.00629897	0.115287	0.0834708	1	0.00683228		0.119644	0.0850225	1	1.2115	0.00563953	0.0987569	0.0701796	0.825424	1	0.000752822	0.000208775	5.52002e-05	0.999527	3.78215
46.6	1.26686	0.0994121	0.145153	-0.0048402	0.00372355	1.26855	0.105962	0.146279	0.00126556	0.00802691	0.00632764	0.115313	0.0835304	1	0.00686338		0.119671	0.0850832	1	1.21162	0.00566464	0.0987694	0.0702228	0.825343	1	0.000931485	0.000230865	8.88473e-05	0.999421	2.59844
46.8	1.32601	0.104306	0.152192	-0.00489253	0.00409702	1.32769	0.110856	0.153319	0.00121323	0.00840038	0.00632704	0.115477	0.0834951	1	0.00686273		0.119842	0.0850473	1	1.21175	0.00566348	0.0988996	0.0701854	0.825252	1	0.000820748	0.000377972	8.81646e-05	0.999305	4.28711
47	1.31464	0.103177	0.150902	-0.00504287	0.00408112	1.31633	0.109727	0.152028	0.00106289	0.00838449	0.00636959	0.115494	0.0833585	1	0.00690887		0.119859	0.0849081	1	1.21168	0.00570192	0.0989199	0.0700749	0.825303	1	0.000406752	0.000391338	0.000138099	0.999357	2.83374
47.2	1.35774	0.106666	0.155773	-0.00487707	0.00434289	1.35943	0.113216	0.156899	0.00122869	0.00864625	0.00636022	0.115416	0.0832822	1	0.00689871		0.119778	0.0848304	1	1.21151	0.00569433	0.0988667	0.0700205	0.825418	1	0.000178465	0.000321899	0.000127111	0.999501	2.53243
47.4	1.32609	0.104158	0.151669	-0.00480853	0.00419017	1.32778	0.110708	0.152795	0.00129723	0.00849354	0.00639681	0.115076	0.0833784	1	0.0069384		0.119425	0.0849284	1	1.21129	0.0057281	0.0985932	0.0701139	0.825565	1	0.000477235	1.75031e-05	0.000170015	0.99968	0.10295		0.10295
47.6	1.35436	0.106493	0.155254	-0.00486729	0.00426197	1.35605	0.113043	0.15638	0.00123847	0.00856534	0.00631641	0.115321	0.083362	1	0.00685119		0.119679	0.0849117	1	1.21144	0.0056554	0.0987907	0.0700914	0.825462	1	0.000423083	0.000238609	7.56723e-05	0.999568	3.15319
47.8	1.26585	0.0990983	0.144529	-0.00504853	0.00360425	1.26753	0.105648	0.145655	0.00105723	0.00790761	0.00623858	0.114912	0.0833495	1	0.00676677	0.00686816	0.119255	0.0848989	1	1.21092	0.00558812	0.098483	0.070111	0.825818	1	0.000397372	-0.000123671	-1.57593e-05	1.00003	7.8475			0.10295
48	1.28024	0.100406	0.146669	-0.00493128	0.00385382	1.28193	0.106956	0.147795	0.00117448	0.00815719	0.00636322	0.115291	0.0834339	1	0.00690196		0.119648	0.0849849	1	1.21154	0.00569687	0.0987577	0.0701464	0.825399	1	0.000639928	0.000210671	0.000130598	0.999481	1.61312
48.2	1.31197	0.103082	0.150392	-0.00514677	0.00420713	1.31365	0.109632	0.151518	0.000958988	0.0085105	0.0064785	0.115341	0.083456	1	0.007027		0.1197	0.0850074	1	1.21173	0.00579912	0.0987843	0.0701535	0.825263	1	0.000702989	0.000251568	0.000265854	0.999287	0.946262		0.946262
48.4	1.40439	0.11066	0.161104	-0.00498495	0.00459799	1.40607	0.11721	0.16223	0.00112081	0.00890136	0.00633065	0.115378	0.0833597	1	0.00686663		0.119739	0.0849094	1	1.21151	0.00566781	0.0988338	0.0700853	0.825413	1	0.000414388	0.000289185	9.23884e-05	0.999503	3.1301
48.6	1.39009	0.109548	0.159157	-0.0047639	0.00441901	1.39178	0.116098	0.160283	0.00134186	0.00872238	0.00626707	0.115164	0.0834172	1	0.00679767		0.119517	0.0849679	1	1.21128	0.00561196	0.0986695	0.0701471	0.825571	1	0.000594985	0.00010035	1.77343e-05	0.999716	5.65854
48.8	1.33337	0.104542	0.152321	-0.00488435	0.00402343	1.33506	0.111092	0.153448	0.0012214	0.0083268	0.006237	0.114937	0.0832109	1	0.00676506		0.119281	0.0847577	1	1.2108	0.00558725	0.0985136	0.0700012	0.825898	1	-2.2162e-05	-0.000101694	-1.76059e-05	1.00013	5.77613
49	1.27862	0.10024	0.146298	-0.00488479	0.00383151	1.28031	0.10679	0.147424	0.00122097	0.00813488	0.00635382	0.115147	0.0834091	1	0.00689177		0.119499	0.0849596	1	1.21135	0.00568933	0.0986494	0.0701363	0.825525	1	0.000568987	8.24306e-05	0.000119557	0.99964	0.689468
49.2	1.23646	0.0966714	0.141176	-0.00527152	0.0034984	1.23815	0.103221	0.142302	0.000834237	0.00780176	0.00630114	0.114931	0.0833674	1	0.00683463		0.119275	0.0849172	1	1.21103	0.00564367	0.0984908	0.07012	0.825746	1	0.000449727	-0.000108512	5.77032e-05	0.999926	-1.88052
49.4	1.21731	0.0951692	0.139352	-0.0049337	0.00335575	1.219	0.101719	0.140478	0.00117206	0.00765912	0.00628312	0.115241	0.0834449	1	0.00681508		0.119596	0.0849961	1	1.21141	0.00562576	0.0987249	0.0701631	0.825486	1	0.000676253	0.000168114	3.65901e-05	0.999607	4.59453
49.6	1.24101	0.097021	0.14207	-0.00514636	0.00354549	1.2427	0.103571	0.143197	0.000959399	0.00784885	0.00631598	0.115231	0.0833437	1	0.00685073		0.119586	0.0848931	1	1.21133	0.00565555	0.0987227	0.0700826	0.825539	1	0.00037014	0.00015819	7.51649e-05	0.999664	2.10457
49.8	1.22205	0.0955052	0.140015	-0.00515743	0.00353358	1.22374	0.102055	0.141142	0.000948329	0.00783695	0.00640408	0.115336	0.0833961	1	0.00694629	0.00686968	0.119695	0.0849463	1	1.21159	0.00573321	0.098792	0.0701116	0.825363	1	0.000523568	0.000249489	0.00017856	0.999426	1.39723		1.39723	1.17175
50	1.22977	0.0959482	0.140697	-0.00506971	0.00331147	1.23146	0.102498	0.141823	0.00103605	0.00761483	0.00618358	0.115167	0.0832331	1	0.00670711		0.119519	0.0847803	1	1.21101	0.00553846	0.0986942	0.0700081	0.825759	1	4.01773e-05	0.000105422	-8.02844e-05	0.999964	-1.31311
50.2	1.24739	0.0976314	0.142896	-0.00517245	0.00366108	1.24908	0.104181	0.144022	0.000933314	0.00796445	0.00637626	0.115303	0.0834067	1	0.00691611		0.11966	0.0849572	1	1.21153	0.00570856	0.0987677	0.0701237	0.8254	1	0.000557165	0.000220483	0.000145909	0.999479	1.5111
50.4	1.28501	0.100648	0.147239	-0.00515004	0.0038432	1.2867	0.107198	0.148365	0.000955718	0.00814657	0.00633135	0.115306	0.0833124	1	0.0068674		0.119664	0.0848612	1	1.21139	0.00566901	0.0987824	0.0700526	0.825496	1	0.000273279	0.000225299	9.32122e-05	0.999605	2.41706
50.6	1.29541	0.101515	0.148462	-0.00510258	0.00389717	1.2971	0.108065	0.149589	0.00100318	0.00820054	0.0063222	0.115325	0.0833127	1	0.00685747		0.119684	0.0848614	1	1.2114	0.00566077	0.0987977	0.0700522	0.825489	1	0.000273807	0.000242389	8.24731e-05	0.999599	2.93901
50.8	1.26516	0.099007	0.144815	-0.00511838	0.00373493	1.26685	0.105557	0.145941	0.000987378	0.00803829	0.00634509	0.1152	0.0833222	1	0.0068823		0.119554	0.0848712	1	1.21131	0.00568171	0.098698	0.0700658	0.825554	1	0.000305348	0.000129706	0.000109325	0.999676	1.18643
51	1.24064	0.0969403	0.141966	-0.00511475	0.00369394	1.24233	0.10349	0.143093	0.000991014	0.00799731	0.00643735	0.115181	0.0833034	1	0.00698237		0.119534	0.084852	1	1.21137	0.00576403	0.098677	0.0700464	0.825513	1	0.000246966	0.000110045	0.000217604	0.999604	0.505711		0.505711
51.2	1.23538	0.0965489	0.141503	-0.00522363	0.00367001	1.23707	0.103099	0.142629	0.000882127	0.00797338	0.00644538	0.115296	0.0833412	1	0.00699108		0.119654	0.0848905	1	1.21154	0.00577043	0.0987619	0.0700686	0.825399	1	0.000358142	0.000212399	0.00022702	0.999461	0.935598		0.935598
51.4	1.25249	0.0980118	0.143284	-0.00516514	0.00368795	1.25418	0.104562	0.14441	0.000940622	0.00799131	0.00637173	0.115143	0.0833705	1	0.00691119		0.119494	0.0849203	1	1.21133	0.00570548	0.0986476	0.0701052	0.825542	1	0.000451971	7.79522e-05	0.000140583	0.999656	0.554492
51.6	1.26959	0.0993371	0.145517	-0.00517185	0.0037062	1.27128	0.105887	0.146644	0.000933906	0.00800956	0.00630039	0.115351	0.0832917	1	0.00683381		0.119711	0.08484	1	1.21138	0.00564133	0.0988214	0.0700356	0.825502	1	0.00021006	0.000266207	5.68803e-05	0.999618	4.68013
51.8	1.26544	0.0991547	0.144604	-0.00522917	0.00369202	1.26713	0.105705	0.14573	0.000876589	0.00799539	0.00630983	0.115008	0.0834204	1	0.00684406	0.00687929	0.119355	0.0849712	1	1.21117	0.00565078	0.098545	0.0701563	0.825648	1	0.000607774	-4.02429e-05	6.79118e-05	0.999803	-0.592576			0.720655
52	1.24102	0.0966628	0.142	-0.00504209	0.00377819	1.24271	0.103213	0.143126	0.00106367	0.00808156	0.0065032	0.115173	0.0830549	1	0.00705379		0.119526	0.0845988	1	1.21118	0.00582391	0.0986856	0.0698484	0.825642	1	-0.000505158	0.00010077	0.000294943	0.999745	0.34166		0.34166
52.2	1.2649	0.0991207	0.145109	-0.00517338	0.00347633	1.26659	0.105671	0.146235	0.000932374	0.0077797	0.00614223	0.115456	0.0834292	1	0.00666226		0.119819	0.0849801	1	1.21146	0.00549936	0.0989047	0.0701467	0.825449	1	0.00062608	0.000364582	-0.000128735	0.99959	-2.83203
52.4	1.24903	0.0974902	0.142868	-0.0052355	0.00363448	1.25072	0.10404	0.143994	0.000870257	0.00793785	0.00634661	0.115129	0.0831841	1	0.00688395		0.11948	0.0847304	1	1.21109	0.00568407	0.0986545	0.0699619	0.8257	1	-0.00011036	6.62015e-05	0.000111118	0.999853	0.595776
52.6	1.24173	0.0969525	0.142102	-0.00522832	0.00340794	1.24342	0.103503	0.143229	0.000877443	0.00771131	0.00620171	0.11519	0.0832405	1	0.00672678		0.119543	0.0847879	1	1.21106	0.00555447	0.0987098	0.0700115	0.825724	1	6.17362e-05	0.000125433	-5.89851e-05	0.999916	-2.12652
52.8	1.23544	0.0966523	0.141549	-0.00529065	0.00357856	1.23713	0.103202	0.142675	0.000815112	0.00788193	0.00637115	0.115328	0.0834209	1	0.00691056		0.119686	0.0849716	1	1.21157	0.00570381	0.0987863	0.0701336	0.825376	1	0.000599466	0.000242967	0.000139906	0.99945	1.73665
53	1.21781	0.094989	0.139115	-0.00535977	0.00333476	1.2195	0.101539	0.140242	0.000745984	0.00763812	0.00626333	0.114999	0.0832628	1	0.00679361		0.119346	0.0848106	1	1.21095	0.00561015	0.0985554	0.0700365	0.825798	1	0.00013271	-4.66248e-05	1.33157e-05	0.999996	-3.50148
53.2	1.22484	0.0954217	0.14029	-0.00540214	0.00348392	1.22653	0.101972	0.141417	0.000703623	0.00778728	0.00634903	0.115298	0.0831383	1	0.00688658		0.119656	0.0846838	1	1.21123	0.00568562	0.0987889	0.0699158	0.82561	1	-0.000252949	0.000217425	0.00011398	0.999739	1.90757
53.4	1.19396	0.0930564	0.136419	-0.00521086	0.00350721	1.19565	0.0996064	0.137545	0.000894897	0.00781058	0.00653249	0.115038	0.0833072	1	0.00708556		0.119386	0.0848559	1	1.21133	0.00584942	0.0985578	0.070052	0.825541	1	0.000260131	-2.07092e-05	0.00032926	0.999619	-0.0628962		-0.0628962
53.6	1.21244	0.0948143	0.139056	-0.00499116	0.00331673	1.21412	0.101364	0.140182	0.0011146	0.0076201	0.00627621	0.11546	0.0834876	1	0.00680758		0.119823	0.0850396	1	1.21167	0.00561834	0.098891	0.0701837	0.825307	1	0.000799507	0.000363792	2.85086e-05	0.999385	12.7608
53.8	1.22745	0.0957722	0.140427	-0.00545657	0.0033663	1.22914	0.102322	0.141554	0.000649188	0.00766967	0.00623987	0.115165	0.0832471	1	0.00676817	0.00685789	0.119517	0.0847946	1	1.21108	0.00558854	0.0986866	0.0700157	0.825709	1	8.14718e-05	0.00010196	-1.41922e-05	0.99989	-7.18424			0.139382
54	1.23666	0.0965852	0.141523	-0.00537871	0.00338798	1.23835	0.103135	0.142649	0.000727053	0.00769135	0.00621097	0.115193	0.0832845	1	0.00673682		0.119547	0.0848327	1	1.21112	0.00556249	0.0987081	0.070045	0.825684	1	0.00019423	0.00012828	-4.8115e-05	0.999866	-2.6661
54.2	1.21647	0.0949247	0.13944	-0.00526757	0.0034749	1.21816	0.101475	0.140566	0.000838194	0.00777827	0.00638528	0.115393	0.0833019	1	0.00692589		0.119754	0.0848504	1	1.21153	0.00571665	0.0988452	0.0700357	0.825402	1	0.000238012	0.000300619	0.000156509	0.999477	1.92077
54.4	1.1805	0.0915197	0.135077	-0.00521281	0.00313742	1.18219	0.0980697	0.136204	0.000892954	0.00744078	0.00629407	0.115213	0.082956	1	0.00682696		0.119567	0.0844981	1	1.21089	0.00563796	0.0987432	0.0697817	0.825837	1	-0.00080085	0.00014328	4.94556e-05	1.00003	2.89715
54.6	1.18663	0.0922232	0.13571	-0.00539528	0.00325608	1.18832	0.0987732	0.136836	0.000710475	0.00755945	0.00636145	0.115151	0.0831199	1	0.00690005		0.119503	0.0846651	1	1.21107	0.00569749	0.0986756	0.0699095	0.825717	1	-0.000305059	8.55205e-05	0.000128547	0.999871	0.665287
54.8	1.19763	0.0937074	0.137277	-0.00526106	0.00335268	1.19932	0.100257	0.138403	0.000844703	0.00765605	0.00638367	0.115402	0.0835954	1	0.00692415		0.119763	0.0851494	1	1.21184	0.00571376	0.0988278	0.0702647	0.825194	1	0.00112429	0.000308542	0.000154584	0.999224	1.99595
55	1.13244	0.0878348	0.129553	-0.00557198	0.00283392	1.13413	0.0943848	0.130679	0.000533778	0.00713728	0.00629317	0.115224	0.083222	1	0.00682598		0.119579	0.0847691	1	1.21117	0.00563584	0.0987298	0.0699892	0.825645	1	2.99369e-06	0.00015319	4.83863e-05	0.999798	3.16597
55.2	1.21462	0.0950138	0.139467	-0.00542523	0.00338314	1.2163	0.101564	0.140593	0.000680532	0.00768651	0.00631957	0.115591	0.0835021	1	0.00685461		0.119959	0.0850543	1	1.21187	0.00565624	0.098987	0.0701845	0.825172	1	0.000838893	0.000479141	7.94022e-05	0.999208	6.03435
55.4	1.19618	0.0931661	0.137285	-0.00534487	0.00333755	1.19787	0.0997161	0.138412	0.000760885	0.00764092	0.00637877	0.115548	0.0832447	1	0.00691883		0.119915	0.0847922	1	1.21163	0.00571037	0.0989706	0.0699821	0.825337	1	6.1485e-05	0.000439671	0.000148887	0.999394	2.95306
55.6	1.2142	0.0949066	0.139062	-0.00527196	0.00333348	1.21588	0.101457	0.140188	0.000833795	0.00763684	0.00628089	0.115298	0.0834426	1	0.00681267		0.119655	0.0849938	1	1.21146	0.00562351	0.0987692	0.0701581	0.825449	1	0.000667882	0.000219017	3.39858e-05	0.999561	6.44437
55.8	1.22719	0.095796	0.140623	-0.00545043	0.00334024	1.22887	0.102346	0.141749	0.000655331	0.00764361	0.00622001	0.115349	0.0832844	1	0.00674663	0.00684726	0.119708	0.0848326	1	1.21129	0.0055698	0.0988274	0.070035	0.825568	1	0.000189777	0.00026689	-3.74685e-05	0.999718	-7.12304			#DIV/0!
56	1.19128	0.0928652	0.136095	-0.00525733	0.00329152	1.19296	0.0994152	0.137221	0.00084843	0.00759489	0.0063664	0.115026	0.0833347	1	0.00690542		0.119373	0.0848838	1	1.21116	0.00570148	0.0985607	0.0700846	0.825653	1	0.000346898	-2.63937e-05	0.000134327	0.999796	-0.196489
56.2	1.21894	0.0950437	0.139716	-0.00548502	0.00367624	1.22063	0.101594	0.140843	0.000620735	0.00797961	0.0065373	0.115385	0.0832307	1	0.00709078		0.119746	0.0847779	1	1.21161	0.00585234	0.0988319	0.069971	0.825345	1	1.99064e-05	0.000289129	0.000334891	0.99937	0.863352		0.863352
56.4	1.20215	0.0939401	0.137637	-0.00533373	0.00318561	1.20384	0.10049	0.138763	0.000772029	0.00748898	0.00622089	0.115267	0.0834745	1	0.00674759		0.119623	0.0850262	1	1.2114	0.00557009	0.098748	0.0701886	0.825493	1	0.00076615	0.000193372	-3.64411e-05	0.99963	-5.30644
56.6	1.25841	0.0981317	0.144308	-0.00544013	0.0036931	1.2601	0.104682	0.145434	0.000665625	0.00799646	0.00634589	0.115414	0.083074	1	0.00688317		0.119776	0.0846184	1	1.21128	0.00568257	0.0988843	0.0698587	0.825574	1	-0.000450052	0.000321245	0.000110307	0.999694	2.91228
56.8	1.2497	0.0977495	0.14304	-0.00518459	0.00369676	1.25139	0.104299	0.144167	0.000921168	0.00800013	0.00639301	0.115205	0.0833471	1	0.00693427		0.11956	0.0848965	1	1.21139	0.00572423	0.0986962	0.0700818	0.825498	1	0.000379236	0.000133277	0.000165561	0.999596	0.805003
57	1.26553	0.0988839	0.14521	-0.00528734	0.00368474	1.26721	0.105434	0.146336	0.000818423	0.00798811	0.00630368	0.115479	0.0832014	1	0.00683738		0.119843	0.0847481	1	1.21143	0.00564406	0.098927	0.0699571	0.825472	1	-6.6039e-05	0.000379866	6.07615e-05	0.999578	6.25175
57.2	1.22464	0.0954927	0.140126	-0.0054392	0.00341014	1.22633	0.102043	0.141252	0.00066656	0.00771351	0.00628989	0.115183	0.0832096	1	0.00682243		0.119536	0.0847564	1	1.21111	0.00563318	0.0986992	0.0699821	0.825686	1	-3.34957e-05	0.000116331	4.45389e-05	0.999848	2.61189
57.4	1.24074	0.0969071	0.142143	-0.00545197	0.00357494	1.24243	0.103457	0.143269	0.000653786	0.0078783	0.00634105	0.115313	0.08327	1	0.00687791		0.119672	0.084818	1	1.21137	0.00567781	0.0987906	0.0700184	0.825513	1	0.000144768	0.000231358	0.000104596	0.999624	2.21193
57.6	1.2073	0.0942324	0.138353	-0.00542796	0.00339938	1.20898	0.100782	0.139479	0.000677799	0.00770275	0.00637126	0.115369	0.0833612	1	0.00691068		0.119729	0.0849109	1	1.21155	0.005704	0.0988231	0.0700845	0.825388	1	0.000418262	0.000279873	0.000140046	0.999464	1.99843
57.8	1.23765	0.0966928	0.141825	-0.00532473	0.0035875	1.23934	0.103243	0.142951	0.000781026	0.00789086	0.00636698	0.115344	0.0833045	1	0.00690604	0.00689157	0.119704	0.0848531	1	1.21146	0.00570058	0.0988091	0.0700419	0.825448	1	0.000247711	0.000257942	0.000135029	0.999538	1.91027			0.863352
58	1.17924	0.0917936	0.134972	-0.00535042	0.003228	1.18093	0.0983436	0.136098	0.000755338	0.00753136	0.00637749	0.115247	0.0832764	1	0.00691744		0.119602	0.0848245	1	1.21134	0.00571055	0.0987353	0.0700251	0.825529	1	0.000165036	0.000170623	0.000147359	0.999636	1.15787
58.2	1.22778	0.0960021	0.140708	-0.0051709	0.00336545	1.22947	0.102552	0.141835	0.000934854	0.00766882	0.00623749	0.115362	0.0834115	1	0.00676559		0.119722	0.0849621	1	1.21145	0.0055847	0.0988255	0.0701325	0.825457	1	0.000573045	0.000278072	-1.69477e-05	0.999579	-16.4077
58.4	1.24932	0.0978868	0.143273	-0.00530818	0.00377796	1.25101	0.104437	0.1444	0.000797577	0.00808133	0.00645984	0.115427	0.0834819	1	0.00700676		0.119789	0.0850338	1	1.21183	0.00578197	0.0988497	0.0701698	0.825199	1	0.000779367	0.000328326	0.000243959	0.999211	1.34583		1.34583
58.6	1.31017	0.102902	0.149962	-0.00527217	0.00398985	1.31185	0.109452	0.151088	0.000833587	0.00829321	0.00632175	0.115171	0.0834333	1	0.00685698		0.119524	0.0849842	1	1.21137	0.00566054	0.098669	0.0701557	0.825515	1	0.00064199	0.000105199	8.19216e-05	0.999634	1.28415
58.8	1.28163	0.100332	0.146359	-0.00537124	0.00385311	1.28332	0.106882	0.147486	0.000734519	0.00815648	0.00635576	0.114925	0.0832856	1	0.00689388		0.119269	0.0848338	1	1.211	0.00569273	0.098488	0.0700529	0.825766	1	0.000201453	-0.000115858	0.000121832	0.999938	-0.950961
59	1.24953	0.0973794	0.142968	-0.00540172	0.00356014	1.25122	0.103929	0.144094	0.000704034	0.0078635	0.00628466	0.115163	0.0830623	1	0.00681675		0.119515	0.0846064	1	1.21094	0.00562931	0.0986963	0.0698684	0.825806	1	-0.000478085	9.8543e-05	3.83919e-05	0.999996	2.56676
59.2	1.26361	0.0989973	0.144861	-0.00521242	0.00358341	1.26529	0.105547	0.145987	0.000893343	0.00788678	0.00623316	0.115378	0.0834172	1	0.00676089		0.119739	0.0849679	1	1.21147	0.00558074	0.0988379	0.0701364	0.825445	1	0.000590166	0.000292605	-2.20248e-05	0.999565	-13.2853
59.4	1.28729	0.100755	0.147552	-0.00538112	0.00395022	1.28898	0.107305	0.148679	0.000724636	0.00825359	0.00640321	0.115346	0.0832485	1	0.00694534		0.119706	0.084796	1	1.21145	0.0057331	0.0988121	0.0699956	0.825459	1	7.74858e-05	0.000258582	0.000177559	0.999542	1.45632		1.45632
59.6	1.26302	0.0988308	0.144641	-0.00522895	0.00349114	1.26471	0.105381	0.145768	0.000876806	0.00779451	0.00616308	0.115258	0.0833242	1	0.00668488		0.119614	0.0848731	1	1.21117	0.00551935	0.0987588	0.0700752	0.825647	1	0.000313529	0.000187395	-0.000104322	0.99983	-1.7963
59.8	1.28363	0.100372	0.146912	-0.00521117	0.00387746	1.28532	0.106922	0.148038	0.000894594	0.00818083	0.00636483	0.115177	0.083187	1	0.00690371	0.00685522	0.11953	0.0847334	1	1.21117	0.00570005	0.0986896	0.0699602	0.82565	1	-0.000103099	0.000108418	0.000132507	0.999788	0.81821			1.40107
60	1.28391	0.100489	0.147172	-0.00524312	0.0038295	1.28559	0.107039	0.148298	0.000862635	0.00813286	0.00632615	0.115354	0.0832603	1	0.00686176		0.119713	0.0848081	1	1.21138	0.0056644	0.0988237	0.0700093	0.825503	1	0.000114748	0.000267721	8.71177e-05	0.999613	3.0731
60.2	1.29006	0.100982	0.147849	-0.0050617	0.00389873	1.29175	0.107532	0.148975	0.00104406	0.0082021	0.00634959	0.115328	0.0832451	1	0.00688718		0.119687	0.0847926	1	1.21137	0.00568547	0.0988031	0.0699975	0.825514	1	6.89867e-05	0.000244082	0.00011463	0.999622	2.1293
60.4	1.29915	0.101933	0.149044	-0.00510114	0.00382661	1.30084	0.108483	0.15017	0.00100461	0.00812998	0.0062498	0.115441	0.0833948	1	0.00677894		0.119804	0.0849451	1	1.21153	0.00559537	0.0988869	0.070114	0.825404	1	0.000520437	0.000348245	-2.47962e-06	0.999509	-140.443
60.6	1.3029	0.101888	0.149177	-0.00522888	0.00403553	1.30459	0.108438	0.150303	0.000876878	0.0083389	0.00639198	0.115211	0.0831206	1	0.00693315		0.119565	0.0846658	1	1.21116	0.00572437	0.0987195	0.0699045	0.825652	1	-0.000305139	0.000138436	0.000164383	0.999782	0.842157
60.8	1.28692	0.100753	0.147436	-0.00523644	0.00390118	1.28861	0.107303	0.148562	0.000869321	0.00820454	0.00636698	0.115289	0.0832704	1	0.00690605		0.119646	0.0848184	1	1.21137	0.00570102	0.0987694	0.0700185	0.825511	1	0.000146101	0.000208817	0.000135033	0.999615	1.54641
61	1.30314	0.102171	0.149466	-0.00527637	0.00398649	1.30483	0.108721	0.150592	0.000829391	0.00828986	0.00635321	0.115411	0.0833221	1	0.00689111		0.119773	0.084871	1	1.21154	0.00568792	0.0988608	0.0700524	0.825399	1	0.000299238	0.000318386	0.000118881	0.999479	2.6782
61.2	1.35423	0.106449	0.155219	-0.00527639	0.00433228	1.35592	0.112999	0.156346	0.000829364	0.00863564	0.00636886	0.115306	0.0833377	1	0.00690809		0.119664	0.0848869	1	1.21146	0.00570229	0.0987769	0.07007	0.825451	1	0.000348898	0.000224024	0.000137235	0.999542	1.63242
61.4	1.29857	0.101887	0.148562	-0.00519398	0.00386461	1.30026	0.108437	0.149689	0.000911776	0.00816798	0.0062818	0.115122	0.0833964	1	0.00681366		0.119473	0.0849467	1	1.21123	0.00562539	0.0986376	0.0701324	0.825605	1	0.000532661	6.2477e-05	3.50276e-05	0.999754	1.78365
61.6	1.27079	0.0994822	0.145337	-0.00534005	0.00370746	1.27248	0.106032	0.146464	0.000765709	0.00801083	0.00629544	0.115101	0.0833272	1	0.00682845		0.119451	0.0848762	1	1.21116	0.00563796	0.0986256	0.0700787	0.825658	1	0.000323864	4.30177e-05	5.10347e-05	0.999816	0.842912
61.8	1.24627	0.0977378	0.142588	-0.00520257	0.00343178	1.24796	0.104288	0.143714	0.00090319	0.00773515	0.00619824	0.11516	0.0835668	1	0.00672302	0.00685314	0.119512	0.0851202	1	1.21136	0.00555	0.0986597	0.0702686	0.825522	1	0.00104827	9.85538e-05	-6.30491e-05	0.999673	-1.56313			#DIV/0!
62	1.27867	0.100566	0.145896	-0.00505994	0.00390973	1.28036	0.107116	0.147022	0.00104581	0.0082131	0.00641466	0.114828	0.0836604	1	0.00695776		0.119168	0.0852156	1	1.21134	0.00574385	0.0983771	0.0703481	0.825531	1	0.00133502	-0.000203909	0.000190918	0.999641	-1.06805		-1.06805
62.2	1.26744	0.099043	0.144379	-0.00516963	0.00375361	1.26913	0.105593	0.145505	0.000936128	0.00805698	0.00634843	0.11465	0.0832012	1	0.00688593		0.118983	0.0847479	1	1.21062	0.00568795	0.098283	0.0700039	0.826025	1	-4.6414e-05	-0.000361397	0.000113213	1.00026	-3.19218
62.4	1.26198	0.0986437	0.14446	-0.00514705	0.00364607	1.26366	0.105194	0.145587	0.000958709	0.00794944	0.00629078	0.11521	0.0832449	1	0.0068234		0.119564	0.0847924	1	1.21118	0.00563368	0.0987172	0.0700081	0.825641	1	7.26736e-05	0.000140607	4.55868e-05	0.999794	3.08438
62.6	1.24042	0.097109	0.14198	-0.00515086	0.00361356	1.24211	0.103659	0.143106	0.000954896	0.00791692	0.00637376	0.115212	0.0834539	1	0.0069134		0.119567	0.0850052	1	1.21149	0.00570655	0.0986942	0.0701661	0.825433	1	0.000702046	0.000139878	0.000142963	0.999522	0.978422
62.8	1.22422	0.095551	0.140205	-0.00548172	0.00327819	1.22591	0.102101	0.141331	0.000624041	0.00758155	0.00618445	0.115287	0.0832862	1	0.00670806		0.119645	0.0848345	1	1.21119	0.00553842	0.0987829	0.0700424	0.825636	1	0.000197702	0.000213119	-7.92271e-05	0.999811	-2.68997
63	1.21265	0.0945909	0.138758	-0.00525011	0.00343271	1.21434	0.101141	0.139884	0.000855644	0.00773608	0.00637061	0.115193	0.083289	1	0.00690999		0.119547	0.0848373	1	1.21129	0.00570463	0.0986937	0.0700385	0.825563	1	0.000204416	0.000123316	0.000139288	0.999681	0.885333
63.2	1.23556	0.096484	0.141738	-0.00532987	0.00337724	1.23724	0.103034	0.142865	0.000775886	0.0076806	0.00620783	0.11547	0.083277	1	0.00673342		0.119834	0.0848251	1	1.21139	0.00555841	0.0989227	0.0700228	0.825496	1	0.000164589	0.000375417	-5.17402e-05	0.999631	-7.25581
63.4	1.21561	0.0950619	0.139384	-0.00530076	0.00352199	1.2173	0.101612	0.14051	0.000805003	0.00782535	0.00642844	0.115428	0.0834731	1	0.00697271		0.11979	0.0850248	1	1.21179	0.00575407	0.0988541	0.0701648	0.825227	1	0.000753381	0.000330374	0.000207128	0.999253	1.59503		1.59503
63.6	1.20448	0.0939685	0.137777	-0.00541363	0.00337414	1.20617	0.100519	0.138903	0.000692127	0.0076775	0.00636521	0.115161	0.0833372	1	0.00690412		0.119513	0.0848864	1	1.2113	0.00569974	0.0986651	0.0700785	0.825557	1	0.000351186	9.45117e-05	0.000132936	0.999675	0.710956
63.8	1.19562	0.0931645	0.136923	-0.00530529	0.00335761	1.19731	0.0997145	0.138049	0.000800464	0.00766098	0.00639848	0.115299	0.083282	1	0.00694021	0.0068749	0.119657	0.0848302	1	1.21143	0.00572895	0.0987734	0.070025	0.825473	1	0.000180224	0.000216702	0.000171999	0.999561	1.2599		1.2599	0.595628
64	1.22561	0.0959036	0.140596	-0.00514607	0.00311305	1.2273	0.102454	0.141722	0.000959684	0.00741642	0.00604286	0.115474	0.0834788	1	0.00655448		0.119839	0.0850306	1	1.21142	0.00541056	0.0989239	0.0701906	0.825475	1	0.000777637	0.000384542	-0.000245358	0.999644	-1.56727
64.2	1.23597	0.0965731	0.141639	-0.00520663	0.00361879	1.23766	0.103123	0.142765	0.000899133	0.00792216	0.00640094	0.115351	0.0833214	1	0.00694288		0.119711	0.0848703	1	1.21152	0.0057307	0.0988103	0.0700525	0.825407	1	0.000297626	0.000263313	0.000174882	0.999479	1.50566		1.50566
64.4	1.23798	0.0968958	0.14165	-0.00534908	0.00359425	1.23967	0.103446	0.142776	0.00075668	0.00789762	0.00637074	0.115172	0.0834462	1	0.00691012		0.119525	0.0849974	1	1.21143	0.00570409	0.0986644	0.0701627	0.825469	1	0.000680024	0.000104509	0.000139414	0.999567	0.74963
64.6	1.28385	0.100756	0.147003	-0.00502352	0.00386416	1.28553	0.107306	0.148129	0.00108224	0.00816752	0.0063534	0.115228	0.0834717	1	0.00689132		0.119583	0.0850234	1	1.2115	0.00568826	0.0987066	0.0701805	0.825425	1	0.000756103	0.00015451	0.000119073	0.999516	1.29761
64.8	1.2675	0.0992669	0.144506	-0.00505582	0.00357892	1.26919	0.105817	0.145632	0.00104994	0.00788229	0.00621051	0.114745	0.0833738	1	0.00673632		0.119081	0.0849237	1	1.21074	0.0055638	0.0983541	0.0701419	0.82594	1	0.0004759	-0.000272261	-4.87559e-05	1.00019	5.58416
65	1.26048	0.0986517	0.144406	-0.00539846	0.00404585	1.26217	0.105202	0.145533	0.0007073	0.00834922	0.00661497	0.115304	0.0833499	1	0.00717503		0.119661	0.0848993	1	1.21174	0.00592128	0.0987521	0.0700642	0.825262	1	0.000380502	0.000213718	0.00042599	0.999254	0.501698		0.501698
65.2	1.22364	0.0954292	0.140053	-0.00492865	0.00335594	1.22533	0.101979	0.14118	0.00117711	0.0076593	0.0062508	0.115218	0.0832259	1	0.00678003		0.119572	0.084773	1	1.21113	0.00559813	0.0987282	0.0699953	0.825678	1	1.58334e-05	0.000148782	-1.34455e-06	0.999848	-110.656
65.4	1.24276	0.0972836	0.142204	-0.00525202	0.00366712	1.24444	0.103834	0.14333	0.000853737	0.00797049	0.00640485	0.115176	0.0834377	1	0.00694712		0.119529	0.0849888	1	1.21146	0.00573448	0.0986648	0.0701537	0.825447	1	0.000653462	0.000106549	0.00017945	0.999532	0.593756		0.593756
65.6	1.20318	0.0935231	0.137405	-0.00533524	0.00310683	1.20487	0.100073	0.138531	0.00077052	0.0074102	0.0061502	0.114976	0.0830571	1	0.00667091		0.119321	0.0846011	1	1.21059	0.00551044	0.0985643	0.069884	0.826041	1	-0.000486229	-6.39964e-05	-0.000119555	1.00032	0.535287
65.8	1.1982	0.0934412	0.137048	-0.00516384	0.00327015	1.19988	0.0999912	0.138174	0.000941919	0.00757351	0.00631187	0.115156	0.083334	1	0.00684626	0.00684545	0.119509	0.0848832	1	1.21124	0.00565229	0.0986665	0.0700797	0.825602	1	0.00034276	9.201e-05	7.03244e-05	0.999742	1.30836			0.867038
66	1.20067	0.0935804	0.137196	-0.00533178	0.0033148	1.20236	0.10013	0.138322	0.000773975	0.00761816	0.006336	0.115042	0.0832782	1	0.00687244		0.11939	0.0848263	1	1.21109	0.0056746	0.0985807	0.0700414	0.825703	1	0.000176584	-1.07195e-05	9.86495e-05	0.999863	-0.108662
66.2	1.21822	0.0953099	0.13956	-0.00515009	0.00349961	1.21991	0.10186	0.140686	0.000955669	0.00780297	0.00639634	0.115325	0.0834977	1	0.00693789		0.119684	0.0850499	1	1.21167	0.00572589	0.0987756	0.0701922	0.825306	1	0.000831158	0.000239798	0.000169462	0.999359	1.41506		1.41506
66.4	1.18274	0.0922642	0.135493	-0.0053867	0.00302022	1.18443	0.0988142	0.13662	0.000719062	0.00732358	0.00618323	0.115347	0.0834278	1	0.00670673		0.119706	0.0849787	1	1.21139	0.00553639	0.098817	0.0701496	0.825497	1	0.000623886	0.000266017	-8.06388e-05	0.999641	-3.29888
66.6	1.17492	0.0918157	0.134595	-0.00525525	0.00310766	1.17661	0.0983657	0.135721	0.000850508	0.00741103	0.00629864	0.115349	0.0836011	1	0.00683192		0.119709	0.0851552	1	1.2117	0.00563831	0.0987945	0.0702777	0.825289	1	0.00114478	0.000264703	5.48126e-05	0.999362	4.82923
66.8	1.1762	0.0913592	0.134667	-0.00535468	0.00318277	1.17789	0.0979092	0.135794	0.000751083	0.00748614	0.00635557	0.115286	0.0831228	1	0.00689367		0.119643	0.084668	1	1.2112	0.00569158	0.0987802	0.069904	0.825624	1	-0.0002997	0.000206278	0.000121654	0.999755	1.69561
67	1.18413	0.0922211	0.135764	-0.00522057	0.00332402	1.18582	0.0987711	0.13689	0.00088519	0.00762739	0.00643215	0.115439	0.0832933	1	0.00697673		0.119802	0.0848417	1	1.21162	0.00575818	0.0988775	0.0700233	0.825341	1	0.000210007	0.000340497	0.000211508	0.99939	1.60985		1.60985
67.2	1.21726	0.0949028	0.139673	-0.00531873	0.00343336	1.21895	0.101453	0.140799	0.000787025	0.00773673	0.00634706	0.115509	0.0832299	1	0.00688444		0.119874	0.0847772	1	1.21154	0.0056824	0.0989441	0.0699749	0.825399	1	1.85858e-05	0.000405467	0.000111676	0.999478	3.63074
67.4	1.20918	0.0944128	0.138565	-0.00524218	0.0033337	1.21086	0.100963	0.139691	0.00086358	0.00763707	0.00630713	0.115365	0.0833808	1	0.00684112		0.119725	0.0849308	1	1.2115	0.00564683	0.0988239	0.0701041	0.825425	1	0.000478941	0.000278178	6.47853e-05	0.999524	4.29384
67.6	1.22399	0.0955901	0.140022	-0.00502585	0.00368267	1.22568	0.10214	0.141148	0.00107991	0.00798604	0.00651562	0.115159	0.0833337	1	0.00706727		0.119512	0.0848828	1	1.21146	0.00583367	0.0986508	0.0700665	0.825449	1	0.000337392	8.81135e-05	0.000309452	0.999509	0.28474		0.28474
67.8	1.11595	0.0864795	0.127127	-0.0053076	0.00271816	1.11764	0.0930295	0.128253	0.000798155	0.00702153	0.00628246	0.114754	0.0832375	1	0.00681437	0.00688266	0.119091	0.0847848	1	1.21069	0.0056285	0.0983661	0.0700301	0.825975	1	6.18747e-05	-0.000266413	3.57481e-05	1.00021	-7.4525			1.10322
68	1.11269	0.0862567	0.127364	-0.00518539	0.00254104	1.11438	0.0928067	0.12849	0.000920368	0.00684441	0.00614188	0.115301	0.0832808	1	0.00666188		0.119659	0.0848289	1	1.21115	0.00550046	0.098798	0.07004	0.825662	1	0.000181718	0.000227049	-0.000129209	0.999852	-1.75723
68.2	1.09729	0.0850038	0.125456	-0.00537142	0.00277111	1.09898	0.0915538	0.126582	0.000734339	0.00707448	0.00643733	0.115182	0.0833082	1	0.00698235		0.119535	0.0848569	1	1.21137	0.00576399	0.098677	0.0700501	0.825509	1	0.000261609	0.000110569	0.000217587	0.999599	0.508157		0.508157
68.4	1.1215	0.0872033	0.128529	-0.00533658	0.00292265	1.12319	0.0937533	0.129656	0.000769178	0.00722601	0.00643348	0.115435	0.0834707	1	0.00697817		0.119798	0.0850224	1	1.2118	0.00575853	0.0988598	0.0701621	0.82522	1	0.000745797	0.000337078	0.000213039	0.999242	1.58223		1.58223
68.6	1.16754	0.0909333	0.13372	-0.00528947	0.00302109	1.16922	0.0974833	0.134847	0.000816291	0.00732445	0.00626437	0.11533	0.0833743	1	0.00679474		0.119689	0.0849242	1	1.21141	0.00560896	0.0988015	0.0701037	0.825486	1	0.000461076	0.000248626	1.45947e-05	0.999608	17.0354
68.8	1.19801	0.093562	0.137155	-0.00526798	0.00330676	1.1997	0.100112	0.138281	0.000837779	0.00761013	0.00634335	0.115263	0.0834474	1	0.00688041		0.119619	0.0849987	1	1.2115	0.00567926	0.0987365	0.07016	0.825424	1	0.000681919	0.00018604	0.000107277	0.999517	1.7342
69	1.18719	0.0924828	0.135879	-0.00518961	0.00330495	1.18888	0.0990328	0.137005	0.000916145	0.00760831	0.00639959	0.115239	0.0832996	1	0.00694141		0.119594	0.0848481	1	1.21138	0.00573015	0.0987254	0.0700423	0.825502	1	0.000234741	0.000163042	0.000173293	0.999598	0.940847		0.940847
69.2	1.1719	0.091098	0.134293	-0.0051693	0.00334561	1.17358	0.097648	0.135419	0.000936458	0.00764898	0.00651762	0.115389	0.0832049	1	0.00706944		0.11975	0.0847516	1	1.21157	0.00583493	0.0988387	0.0699519	0.825375	1	-5.75815e-05	0.000293102	0.000311815	0.999411	0.939988		0.939988
69.4	1.17601	0.0917021	0.134493	-0.00540171	0.003074	1.17769	0.0982522	0.135619	0.000704052	0.00737736	0.00626424	0.115156	0.0834275	1	0.00679461		0.119509	0.0849784	1	1.21128	0.00560943	0.098663	0.0701558	0.825572	1	0.000626336	9.3617e-05	1.44156e-05	0.999718	6.49414
69.6	1.19349	0.0927537	0.13661	-0.00535877	0.00320137	1.19518	0.0993037	0.137737	0.000746986	0.00750474	0.00627918	0.115244	0.083087	1	0.00681081		0.119599	0.0846316	1	1.21104	0.00562393	0.0987573	0.0698833	0.825735	1	-0.000405232	0.000171089	3.1978e-05	0.99991	5.3502
69.8	1.1672	0.091028	0.133479	-0.00521245	0.00308943	1.16889	0.097578	0.134605	0.000893311	0.0073928	0.00632464	0.115157	0.0834793	1	0.00686012	0.00687739	0.119509	0.0850312	1	1.2114	0.00566296	0.0986535	0.0701925	0.825491	1	0.000781469	9.18078e-05	8.53045e-05	0.999605	1.07624			0.992807
70	1.19541	0.0930943	0.136665	-0.00523356	0.00331697	1.19709	0.0996443	0.137791	0.000872194	0.00762034	0.0063657	0.115105	0.0832385	1	0.00690465		0.119455	0.0847858	1	1.21115	0.00570093	0.0986298	0.0700047	0.825665	1	5.428e-05	4.42743e-05	0.000133515	0.999807	0.331606
70.2	1.17312	0.0915558	0.134338	-0.00504962	0.00311556	1.17481	0.0981059	0.135464	0.00105614	0.00741893	0.00631499	0.115307	0.0835077	1	0.00684965		0.119665	0.0850601	1	1.21157	0.00565351	0.0987681	0.0702062	0.825372	1	0.000863571	0.000226352	7.4e-05	0.999459	3.05882
70.4	1.23997	0.0968437	0.141949	-0.0051762	0.00362056	1.24166	0.103394	0.143075	0.00092956	0.00792393	0.00638174	0.115229	0.0832707	1	0.00692205		0.119584	0.0848187	1	1.21132	0.00571444	0.0987218	0.0700214	0.825542	1	0.000148191	0.000154815	0.000152345	0.999652	1.01622
70.6	1.19953	0.0936807	0.137316	-0.00530686	0.00335272	1.20122	0.100231	0.138442	0.000798896	0.00765609	0.00637361	0.115251	0.083441	1	0.00691324		0.119607	0.0849922	1	1.21151	0.00570629	0.0987255	0.0701538	0.825414	1	0.000662321	0.000174802	0.000142792	0.999498	1.22417
70.8	1.24521	0.0971728	0.142341	-0.00549599	0.00350198	1.2469	0.103723	0.143468	0.000609773	0.00780535	0.0062598	0.115059	0.0831846	1	0.00678979		0.119408	0.084731	1	1.21093	0.0056071	0.0986086	0.0699719	0.825812	1	-0.000105163	7.20877e-06	9.19324e-06	1.00001	0.784138
71	1.20703	0.0942209	0.138342	-0.00502715	0.00319527	1.20872	0.100771	0.139468	0.00107861	0.00749864	0.00620378	0.115385	0.08337	1	0.00672903		0.119746	0.0849198	1	1.21139	0.00555478	0.0988497	0.0701009	0.825495	1	0.000447932	0.000299697	-5.65024e-05	0.999632	-5.30414
71.2	1.23994	0.097005	0.142072	-0.00520464	0.00364652	1.24163	0.103555	0.143198	0.000901121	0.00794988	0.00640278	0.115331	0.0834025	1	0.00694487		0.119689	0.0849529	1	1.21159	0.00573205	0.0987873	0.070117	0.825364	1	0.000543203	0.00024462	0.000177029	0.999427	1.38181		1.38181
71.4	1.13952	0.0885116	0.129987	-0.00537884	0.00269218	1.1412	0.0950616	0.131113	0.000726922	0.00699555	0.00612997	0.11489	0.0832994	1	0.00664896		0.119233	0.0848479	1	1.21073	0.0054917	0.0984799	0.07008	0.825948	1	0.000248775	-0.00013967	-0.000143318	1.00021	0.974549
71.6	1.18031	0.0917005	0.135201	-0.00533473	0.00309833	1.182	0.0982505	0.136327	0.000771026	0.0074017	0.00626201	0.115336	0.0831222	1	0.00679219		0.119695	0.0846674	1	1.21115	0.00560803	0.0988272	0.0699064	0.825658	1	-0.000300831	0.000253997	1.18332e-05	0.999818	21.4647
71.8	1.1368	0.0881718	0.129933	-0.0050984	0.00298041	1.13848	0.0947218	0.131059	0.00100736	0.00728377	0.00639778	0.115117	0.0831999	1	0.00693945	0.00684339	0.119468	0.0847466	1	1.21115	0.00572962	0.0986396	0.0699718	0.825659	1	-6.32372e-05	5.41418e-05	0.000171179	0.999792	0.316287		0.316287	0.84905
72	1.13809	0.0883617	0.130314	-0.00533736	0.00294167	1.13978	0.0949117	0.13144	0.000768401	0.00724503	0.00635652	0.115321	0.083272	1	0.0068947		0.119679	0.08482	1	1.21139	0.00569154	0.0987946	0.0700185	0.825495	1	0.00015024	0.000237304	0.000122759	0.999598	1.9331
72.2	1.14759	0.0895691	0.131718	-0.00543588	0.0031668	1.14928	0.0961191	0.132844	0.000669876	0.00747017	0.00649988	0.115589	0.0836343	1	0.00705019		0.119958	0.085189	1	1.2122	0.00581605	0.0989588	0.0702765	0.824949	1	0.00123416	0.000471828	0.000290878	0.998894	1.62208		1.62208
72.4	1.19406	0.0933652	0.136746	-0.00533549	0.00325826	1.19575	0.0999152	0.137873	0.000770267	0.00756162	0.00632377	0.115303	0.0835589	1	0.00685917		0.11966	0.0851122	1	1.21163	0.0056611	0.0987597	0.0702459	0.825333	1	0.0010179	0.000222142	8.42951e-05	0.99941	2.63529
72.6	1.13125	0.0878418	0.129184	-0.00539352	0.00270707	1.13294	0.0943918	0.130311	0.000712241	0.00701044	0.00618784	0.11502	0.083316	1	0.00671174		0.119367	0.0848648	1	1.21094	0.00554257	0.0985738	0.0700815	0.825802	1	0.000294438	-2.55606e-05	-7.53139e-05	1.00002	0.339387
72.8	1.13739	0.0884645	0.130337	-0.00517392	0.00295742	1.13908	0.0950145	0.131463	0.000931836	0.00726079	0.00637424	0.115411	0.0834131	1	0.00691392		0.119773	0.0849637	1	1.21165	0.00570619	0.0988514	0.0701223	0.82532	1	0.000573758	0.000317665	0.00014354	0.999379	2.21307
73	1.14587	0.0890128	0.130995	-0.00530956	0.00293833	1.14756	0.0955628	0.132121	0.000796199	0.00724169	0.00631053	0.115133	0.083275	1	0.00684481		0.119484	0.084823	1	1.21115	0.00565149	0.0986532	0.070035	0.82566	1	0.000165027	7.0887e-05	6.87506e-05	0.999814	1.03107
73.2	1.18794	0.0926812	0.136487	-0.00534514	0.00326383	1.18963	0.0992312	0.137613	0.000760614	0.0075672	0.00636096	0.115677	0.0834134	1	0.00689951		0.120049	0.084964	1	1.21191	0.00569307	0.0990577	0.0701074	0.825142	1	0.00056813	0.000555222	0.000127977	0.999159	4.33844
73.4	1.14972	0.0891675	0.130898	-0.00534983	0.00291054	1.15141	0.0957175	0.132024	0.000755926	0.00721391	0.0062653	0.114663	0.0831309	1	0.00679575		0.118997	0.0846763	1	1.21047	0.00561415	0.0983065	0.0699533	0.826126	1	-0.000257586	-0.000346747	1.55759e-05	1.0004	-22.2618
73.6	1.12044	0.0871912	0.128507	-0.00528123	0.00279746	1.12213	0.0937413	0.129634	0.00082453	0.00710082	0.006328	0.115525	0.0835388	1	0.00686376		0.119891	0.0850917	1	1.21185	0.00566388	0.0989325	0.0702166	0.825187	1	0.000951359	0.00042031	8.92816e-05	0.999226	4.70769
73.8	1.13805	0.0884012	0.130384	-0.00544697	0.00324107	1.13974	0.0949512	0.13151	0.000658791	0.00754444	0.00661946	0.115386	0.0833098	1	0.0071799	0.00690134	0.119747	0.0848585	1	1.21179	0.00592505	0.0988189	0.0700276	0.825228	1	0.000257147	0.000287443	0.000431249	0.99921	0.666535		0.666535	1.14431
74	1.17121	0.0912129	0.134274	-0.00517975	0.00331193	1.1729	0.0977629	0.135401	0.000926005	0.00761529	0.00649272	0.115441	0.0833517	1	0.00704243		0.119804	0.0849011	1	1.21175	0.0058118	0.0988691	0.070065	0.825254	1	0.000384929	0.000340556	0.000282565	0.99927	1.20523		1.20523
74.2	1.17905	0.0919702	0.134819	-0.00527353	0.00307026	1.18074	0.0985202	0.135945	0.000832232	0.00737363	0.0062449	0.115135	0.0834391	1	0.00677363		0.119487	0.0849902	1	1.21125	0.00559226	0.0986474	0.0701673	0.825593	1	0.000662253	7.53271e-05	-8.29084e-06	0.999749	-9.08559
74.4	1.20855	0.094295	0.138531	-0.00528279	0.00326459	1.21024	0.100845	0.139657	0.000822972	0.00756795	0.00625327	0.115396	0.0833264	1	0.0067827		0.119757	0.0848754	1	1.21142	0.00559899	0.0988573	0.070063	0.825481	1	0.000314992	0.000307784	1.58044e-06	0.999603	194.746
74.6	1.26747	0.0991144	0.145132	-0.00510984	0.00393842	1.26915	0.105664	0.146258	0.00099592	0.00824179	0.00649393	0.115241	0.0832558	1	0.00704374		0.119596	0.0848035	1	1.21144	0.00581433	0.098722	0.070002	0.825462	1	0.000100512	0.000161457	0.000284008	0.999527	0.568495		0.568495
74.8	1.22815	0.0959042	0.140557	-0.00509616	0.00326658	1.22983	0.102454	0.141683	0.0010096	0.00756994	0.00615525	0.115205	0.0833073	1	0.00667639		0.119559	0.0848559	1	1.21109	0.00551271	0.0987201	0.0700657	0.825702	1	0.00026407	0.00014041	-0.000113526	0.9999	-1.23681
75	1.14669	0.0889061	0.130868	-0.00532378	0.00290746	1.14838	0.0954561	0.131995	0.000781976	0.00721082	0.00627913	0.11494	0.0831225	1	0.00681076		0.119284	0.0846677	1	1.21076	0.00562518	0.0985198	0.0699293	0.825926	1	-0.000290279	-0.000100122	3.1869e-05	1.00015	-3.14168
75.2	1.13962	0.0886015	0.130756	-0.00534163	0.00309191	1.14131	0.0951515	0.131883	0.000764133	0.00739528	0.00647966	0.115554	0.0833707	1	0.00702826		0.119921	0.0849205	1	1.21187	0.00579952	0.0989556	0.0700739	0.825171	1	0.000439748	0.000441467	0.00026723	0.999169	1.65201		1.65201
75.4	1.19748	0.0936113	0.137207	-0.0051262	0.00345807	1.19917	0.100161	0.138333	0.000979564	0.00776143	0.00647235	0.115357	0.0835257	1	0.00702033		0.119717	0.0850785	1	1.21182	0.00579323	0.0987916	0.0702074	0.825208	1	0.000913209	0.00026629	0.000258627	0.999221	1.02963		1.02963
75.6	1.14213	0.0887887	0.130696	-0.00536116	0.00309012	1.14382	0.0953387	0.131822	0.000744597	0.00739348	0.00646386	0.115247	0.0833513	1	0.00701112		0.119603	0.0849007	1	1.21151	0.00578707	0.0987219	0.0700782	0.825413	1	0.000389301	0.000168406	0.000248705	0.999475	0.67713		0.67713
75.8	1.20801	0.0943406	0.138732	-0.00524848	0.00343491	1.2097	0.100891	0.139859	0.000857279	0.00773827	0.00639684	0.115614	0.0834012	1	0.00693844	0.00691278	0.119984	0.0849516	1	1.21187	0.00572538	0.0990068	0.0700994	0.825168	1	0.000532182	0.000497788	0.000170075	0.999184	2.92688		2.92688	1.34323
76	1.20099	0.0935772	0.137794	-0.00531146	0.00347944	1.20268	0.100127	0.138921	0.000794298	0.0077828	0.00647121	0.115509	0.0832534	1	0.0070191		0.119875	0.084801	1	1.21169	0.0057928	0.0989316	0.0699854	0.82529	1	8.66884e-05	0.000401872	0.00025735	0.999317	1.56158		1.56158
76.2	1.20338	0.0940215	0.137566	-0.00502332	0.00344928	1.20507	0.100572	0.138692	0.00108244	0.00775265	0.00643337	0.115091	0.0834572	1	0.00697806		0.119441	0.0850086	1	1.21143	0.00576019	0.098595	0.0701723	0.825472	1	0.000713952	2.97864e-05	0.000212913	0.999559	0.1399		0.1399
76.4	1.14276	0.088403	0.130449	-0.0052237	0.00292624	1.14444	0.094953	0.131576	0.000882063	0.0072296	0.00631713	0.114969	0.0829686	1	0.00685197		0.119314	0.084511	1	1.21068	0.00565962	0.0985516	0.0698047	0.825984	1	-0.000757034	-7.53767e-05	7.65002e-05	1.00021	-0.985313
76.6	1.15407	0.0898264	0.132476	-0.00543563	0.00300465	1.15576	0.0963764	0.133602	0.000670134	0.00730802	0.00632311	0.115597	0.0833877	1	0.00685846		0.119966	0.0849378	1	1.21176	0.0056599	0.099001	0.0700945	0.825245	1	0.000493233	0.000484591	8.35663e-05	0.999295	5.79888
76.8	1.16844	0.0910834	0.133939	-0.00531081	0.00286651	1.17013	0.0976335	0.135065	0.000794953	0.00716988	0.00612744	0.115428	0.0834384	1	0.00664622		0.119791	0.0849895	1	1.21143	0.00548628	0.098884	0.0701566	0.825473	1	0.000655201	0.000340474	-0.000146095	0.999623	-2.33049
77	1.19658	0.0935374	0.13734	-0.00517692	0.00353715	1.19827	0.100087	0.138466	0.000928842	0.00784051	0.00654321	0.115555	0.0835268	1	0.0070972		0.119923	0.0850795	1	1.2121	0.00585529	0.098938	0.0701919	0.825015	1	0.000909695	0.000440578	0.000341731	0.998965	1.28925		1.28925
77.2	1.18464	0.0923987	0.13578	-0.00536394	0.003147	1.18633	0.0989487	0.136906	0.000741815	0.00745036	0.00628019	0.115403	0.0834075	1	0.0068119		0.119765	0.084958	1	1.21153	0.00562254	0.0988536	0.0701243	0.8254	1	0.000559189	0.000313164	3.31719e-05	0.999498	9.44065
77.4	1.24324	0.0970957	0.142344	-0.00524054	0.00349682	1.24492	0.103646	0.14347	0.000865224	0.00780019	0.00626559	0.115244	0.0832547	1	0.00679607		0.119599	0.0848023	1	1.2112	0.00561103	0.0987448	0.0700153	0.825629	1	0.000101741	0.000171706	1.60215e-05	0.999784	10.7172
77.6	1.19768	0.0931947	0.137341	-0.00513617	0.0034686	1.19937	0.0997448	0.138467	0.00096959	0.00777196	0.00648003	0.11545	0.0831642	1	0.00702866		0.119813	0.0847102	1	1.21155	0.00580137	0.0988925	0.0699187	0.825387	1	-0.000181374	0.000348748	0.000267712	0.999434	1.3027		1.3027
77.8	1.22577	0.0957561	0.140521	-0.0052506	0.00344167	1.22746	0.102306	0.141647	0.000855156	0.00774504	0.0063098	0.115399	0.0833477	1	0.00684403	0.00689317	0.11976	0.0848971	1	1.2115	0.00564921	0.0988525	0.070076	0.825422	1	0.00037806	0.000308249	6.79327e-05	0.999519	4.53756			1.07336
78	1.21824	0.0953304	0.139632	-0.00532102	0.00348212	1.21993	0.10188	0.140758	0.00078474	0.00778548	0.00638192	0.115382	0.0835135	1	0.00692225		0.119743	0.085066	1	1.21173	0.00571269	0.09882	0.070202	0.825265	1	0.000877629	0.000291561	0.00015254	0.999312	1.91138
78.2	1.26706	0.0990453	0.144971	-0.00539589	0.003787	1.26875	0.105595	0.146097	0.000709866	0.00809037	0.00637663	0.11515	0.0832276	1	0.00691651		0.119502	0.0847748	1	1.21119	0.00571049	0.0986648	0.0699928	0.825632	1	2.01369e-05	8.44681e-05	0.000146352	0.999764	0.577156
78.4	1.19114	0.0927517	0.136166	-0.00511482	0.00318701	1.19283	0.0993017	0.137292	0.000990942	0.00749038	0.00627953	0.115099	0.0832491	1	0.00681118		0.119449	0.0847967	1	1.21106	0.00562417	0.0986317	0.0700188	0.825725	1	8.84405e-05	4.14768e-05	3.23533e-05	0.999902	1.28199
78.6	1.20385	0.09375	0.138267	-0.00522788	0.00346227	1.20554	0.1003	0.139393	0.000877876	0.00776564	0.00644165	0.115628	0.0831996	1	0.00698703		0.119998	0.0847462	1	1.21173	0.00576616	0.0990301	0.0699381	0.825266	1	-7.81355e-05	0.000508518	0.00022267	0.999291	2.28373		2.28373
78.8	1.22525	0.0957592	0.140418	-0.00519448	0.00357206	1.22694	0.102309	0.141544	0.000911275	0.00787542	0.00641874	0.115363	0.0833855	1	0.00696218		0.119723	0.0849356	1	1.21162	0.00574617	0.0988126	0.0701007	0.82534	1	0.000490544	0.000273387	0.000195757	0.999394	1.39656		1.39656
79	1.23252	0.0964427	0.141338	-0.00530748	0.00358141	1.2342	0.102993	0.142464	0.000798282	0.00788477	0.00638855	0.11543	0.0834486	1	0.00692944		0.119792	0.0849999	1	1.21172	0.00571867	0.0988612	0.070148	0.825272	1	0.000680233	0.000333492	0.000160326	0.999317	2.08009
79.2	1.21333	0.0946966	0.138528	-0.00534831	0.00331459	1.21502	0.101247	0.139654	0.000757448	0.00761796	0.00626983	0.11494	0.0833292	1	0.00680067		0.119284	0.0848783	1	1.21096	0.00561591	0.0985035	0.0700916	0.825789	1	0.000334777	-9.97343e-05	2.09386e-05	0.999986	-4.76317
79.4	1.18136	0.0919026	0.135709	-0.00533262	0.00335162	1.18305	0.0984526	0.136835	0.000773135	0.00765499	0.00647056	0.115663	0.0832194	1	0.00701839		0.120034	0.0847664	1	1.21182	0.00579162	0.0990529	0.0699497	0.825206	1	-1.96874e-05	0.000538874	0.000256586	0.99921	2.10017		2.10017
79.6	1.19583	0.0935648	0.137537	-0.00539841	0.00335837	1.19752	0.100115	0.138663	0.000707345	0.00766173	0.006398	0.115792	0.0836017	1	0.00693969		0.120168	0.0851559	1	1.21226	0.00572457	0.0991271	0.0702453	0.824903	1	0.00113284	0.000656085	0.000171406	0.998857	3.82766		3.82766
79.8	1.18897	0.0924811	0.13653	-0.00521415	0.00332725	1.19066	0.0990311	0.137656	0.000891613	0.00763062	0.00640873	0.115614	0.0831734	1	0.00695133	0.00692387	0.119983	0.0847195	1	1.21165	0.00573706	0.0990243	0.0699206	0.825318	1	-0.000156245	0.000497005	0.000184059	0.999362	2.70024		2.70024	2.46167
80	1.14315	0.0891004	0.131145	-0.00546497	0.00308461	1.14484	0.0956504	0.132272	0.000640787	0.00738798	0.00645328	0.115537	0.0835491	1	0.00699965		0.119904	0.0851023	1	1.21201	0.00577526	0.09893	0.0702161	0.825079	1	0.000979467	0.000427166	0.000236248	0.999064	1.80813		1.80813
80.2	1.13831	0.0885377	0.131014	-0.00536097	0.00308159	1.14	0.0950878	0.13214	0.000744792	0.00738496	0.00647805	0.115913	0.0834106	1	0.00702652		0.120293	0.0849611	1	1.21228	0.00579611	0.099229	0.0700837	0.824891	1	0.000550877	0.000761189	0.000265322	0.99882	2.86892		2.86892
80.4	1.15523	0.0897465	0.132962	-0.0052449	0.00321325	1.15692	0.0962965	0.134088	0.000860856	0.00751662	0.00649712	0.115901	0.0832355	1	0.0070472		0.120281	0.0847828	1	1.21211	0.00581398	0.099233	0.0699463	0.825007	1	2.20956e-05	0.0007504	0.000287718	0.998956	2.60811		2.60811
80.6	1.20782	0.0941464	0.139388	-0.00536441	0.00351045	1.20951	0.100696	0.140514	0.000741349	0.00781381	0.0064603	0.116174	0.0832537	1	0.00700726		0.120565	0.0848013	1	1.21237	0.00577979	0.0994452	0.0699466	0.824828	1	7.10076e-05	0.000994865	0.000244528	0.998741	4.06851		4.06851
80.8	1.16702	0.0905902	0.134259	-0.00526683	0.00333874	1.16871	0.0971402	0.135385	0.000838926	0.00764211	0.00653892	0.115841	0.0831174	1	0.00709254		0.120219	0.0846625	1	1.21197	0.00585205	0.099193	0.069855	0.8251	1	-0.000333849	0.000695752	0.000336781	0.99906	2.06589		2.06589
81	1.17048	0.0913419	0.135429	-0.00522219	0.0032796	1.17217	0.097892	0.136555	0.000883572	0.00758297	0.00646916	0.116497	0.0835133	1	0.00701687		0.1209	0.0850657	1	1.21298	0.0057848	0.0996719	0.0701294	0.824414	1	0.000845777	0.00128233	0.00025485	0.998227	5.0317		5.0317
81.2	1.15548	0.0898635	0.133022	-0.00531102	0.00342587	1.15717	0.0964135	0.134148	0.000794736	0.00772923	0.00667945	0.115928	0.0833187	1	0.00724497		0.12031	0.0848676	1	1.21242	0.00597562	0.0992308	0.0699984	0.824795	1	0.000268921	0.000768546	0.000501485	0.998655	1.53254		1.53254
81.4	1.14513	0.0891001	0.132279	-0.00545535	0.00304943	1.14682	0.0956501	0.133405	0.000650408	0.00735279	0.00641148	0.116326	0.0834049	1	0.00695431		0.120723	0.0849554	1	1.21263	0.00573489	0.0995543	0.0700586	0.824652	1	0.00052455	0.00113192	0.000187264	0.998535	6.04453		6.04453
81.6	1.26889	0.0996706	0.147229	-0.00508928	0.00419907	1.27058	0.106221	0.148355	0.00101648	0.00850244	0.0066918	0.116762	0.0836003	1	0.00725836		0.121175	0.0851544	1	1.21359	0.00598091	0.0998485	0.0701675	0.824003	1	0.00109648	0.00151027	0.00051562	0.997669	2.92903		2.92903
81.8	1.2652	0.0992258	0.146421	-0.00518992	0.00415148	1.26689	0.105776	0.147547	0.000915842	0.00845485	0.0066737	0.116464	0.0834924	1	0.00723873	0.00708864	0.120866	0.0850445	1	1.21315	0.00596689	0.0996296	0.0701023	0.824301	1	0.000779386	0.00124573	0.00049454	0.998043	2.51897		2.51897	3.14763
82	1.19043	0.0925898	0.137147	-0.00529851	0.00352669	1.19212	0.0991398	0.138273	0.000807252	0.00783006	0.00656817	0.115989	0.0831626	1	0.00712427		0.120373	0.0847086	1	1.21221	0.00587711	0.0993006	0.0698797	0.824943	1	-0.0002016	0.000826503	0.000371061	0.998859	2.22741		2.22741
82.2	1.16837	0.0911168	0.135631	-0.00548074	0.00346195	1.17006	0.0976668	0.136758	0.000625018	0.00776532	0.00663668	0.116881	0.0834716	1	0.00719858		0.121298	0.0850233	1	1.21352	0.00593198	0.0999557	0.0700633	0.824049	1	0.000706371	0.00161799	0.000451097	0.997734	3.58679		3.58679
82.4	1.22512	0.0958629	0.14216	-0.00518779	0.00390366	1.2268	0.102413	0.143286	0.000917974	0.00820702	0.00668976	0.116796	0.0834794	1	0.00725615		0.12121	0.0850313	1	1.2135	0.00597953	0.099885	0.0700712	0.824064	1	0.00073115	0.00154081	0.000513276	0.997742	3.00191		3.00191
82.6	1.24086	0.0969376	0.144373	-0.00549538	0.00405982	1.24255	0.103488	0.145499	0.000610382	0.00836318	0.00673069	0.117098	0.0832868	1	0.00730054		0.121523	0.084835	1	1.21366	0.00601532	0.10013	0.0699002	0.823955	1	0.000141583	0.0018079	0.000561215	0.997591	3.2214		3.2214
82.8	1.2665	0.0990832	0.147432	-0.00520913	0.00425191	1.26819	0.105633	0.148558	0.000896632	0.00855527	0.00674605	0.117142	0.0832944	1	0.0073172		0.121569	0.0848428	1	1.21373	0.00602869	0.100162	0.0699026	0.823907	1	0.000163218	0.00184681	0.000579185	0.997529	3.18863		3.18863
83	1.1972	0.0931712	0.138936	-0.00537491	0.0037602	1.19889	0.0997212	0.140063	0.000730851	0.00806357	0.00672585	0.116827	0.0831778	1	0.00729529		0.121242	0.084724	1	1.21326	0.00601296	0.0999308	0.0698316	0.824225	1	-0.000180249	0.0015674	0.000555679	0.997927	2.82069		2.82069
83.2	1.23991	0.0971428	0.144702	-0.00529911	0.00421702	1.2416	0.103693	0.145828	0.000806647	0.00852039	0.00686243	0.117452	0.0835156	1	0.00744344		0.121891	0.0850681	1	1.2144	0.00612931	0.100371	0.0700493	0.82345	1	0.000819262	0.00211805	0.000715192	0.996939	2.96151		2.96151
83.4	1.20687	0.0939411	0.140776	-0.00514948	0.003907	1.20856	0.100491	0.141902	0.000956283	0.00821036	0.00679351	0.117415	0.0831495	1	0.00736869		0.121852	0.0846952	1	1.21392	0.00607018	0.100379	0.0697703	0.82378	1	-0.000281654	0.00208792	0.000634745	0.997356	3.28938		3.28938
83.6	1.21306	0.0950227	0.14151	-0.00544269	0.00414631	1.21475	0.101573	0.142636	0.000663064	0.00844968	0.00695589	0.11742	0.083616	1	0.00754481		0.121857	0.0851703	1	1.21457	0.0062119	0.10033	0.0701237	0.823335	1	0.00112057	0.0020862	0.000824488	0.996777	2.5303		2.5303
83.8	1.16257	0.0902651	0.135987	-0.00533705	0.0038547	1.16426	0.0968151	0.137113	0.000768713	0.00815806	0.00700711	0.117769	0.0831562	1	0.00760037	0.00734493	0.12222	0.084702	1	1.21452	0.00625791	0.100632	0.0697411	0.823369	1	-0.000274785	0.0023953	0.000884554	0.996797	2.70792		2.70792	2.95359
84	1.17958	0.0921152	0.138362	-0.00533286	0.00391017	1.18127	0.0986652	0.139488	0.000772901	0.00821354	0.00695313	0.118083	0.0835246	1	0.00754182		0.122546	0.0850772	1	1.21517	0.00620642	0.100847	0.0700129	0.822933	1	0.000827954	0.00267569	0.000820988	0.996273	3.25912		3.25912
84.2	1.17729	0.0918577	0.138214	-0.00539375	0.00390773	1.17898	0.0984077	0.139341	0.000712007	0.0082111	0.00696456	0.118187	0.0834683	1	0.00755422		0.122654	0.08502	1	1.21523	0.0062163	0.100931	0.0699621	0.822891	1	0.000655663	0.00276763	0.000834338	0.996216	3.31716		3.31716
84.4	1.19337	0.0933776	0.140419	-0.00539612	0.00428602	1.19506	0.0999277	0.141545	0.000709635	0.00858938	0.00718743	0.118442	0.0836176	1	0.00779596		0.122919	0.085172	1	1.21589	0.00641175	0.101094	0.0700493	0.822445	1	0.00109349	0.00298577	0.00109456	0.995615	2.72782		2.72782
84.6	1.1874	0.092379	0.13928	-0.00527475	0.00409339	1.18909	0.098929	0.140406	0.000831012	0.00839675	0.00706152	0.118079	0.0831976	1	0.00765939		0.122541	0.0847442	1	1.21495	0.00630431	0.100862	0.0697515	0.823082	1	-0.000159067	0.00266876	0.000947984	0.996427	2.8152		2.8152
84.8	1.13114	0.0880114	0.132961	-0.00526845	0.00376166	1.13282	0.0945614	0.134087	0.000837309	0.00806503	0.0071194	0.118366	0.0834741	1	0.00772217		0.122839	0.0850258	1	1.21559	0.00635263	0.101053	0.0699463	0.822648	1	0.000665022	0.00292066	0.00101524	0.995879	2.87681		2.87681
85	1.11164	0.0860437	0.130773	-0.00545066	0.00362191	1.11333	0.0925937	0.1319	0.000655096	0.00792528	0.00711854	0.118473	0.0831683	1	0.00772124		0.122951	0.0847144	1	1.21539	0.00635291	0.101162	0.0697016	0.822783	1	-0.000258303	0.00301701	0.00101442	0.99604	2.97411		2.97411
85.2	1.12255	0.0875287	0.132754	-0.00534279	0.00372613	1.12424	0.0940787	0.13388	0.000762967	0.0080295	0.00714214	0.119085	0.0836819	1	0.00774684		0.123586	0.0852375	1	1.21657	0.00636777	0.101585	0.0700638	0.821983	1	0.00127111	0.00355707	0.00104114	0.995048	3.41652		3.41652
85.4	1.12981	0.0878485	0.133384	-0.00532796	0.00410461	1.1315	0.0943985	0.13451	0.000777797	0.00840798	0.00743083	0.118878	0.0834278	1	0.00805996		0.123371	0.0849787	1	1.21641	0.00662603	0.101422	0.0698603	0.822092	1	0.000505909	0.00336412	0.00137868	0.995116	2.44011		2.44011
85.6	1.1434	0.0888603	0.134826	-0.00544831	0.00420939	1.14509	0.0954103	0.135952	0.000657445	0.00851276	0.00743416	0.118726	0.0833215	1	0.00806357		0.123213	0.0848704	1	1.21615	0.00663043	0.101315	0.0697863	0.822269	1	0.000189794	0.00322996	0.00138284	0.995334	2.33575		2.33575
85.8	1.14737	0.0893537	0.135166	-0.0054267	0.00380792	1.14906	0.0959037	0.136292	0.000679059	0.00811128	0.00705907	0.118612	0.0834629	1	0.00765673	0.00775219	0.123095	0.0850144	1	1.21577	0.00629786	0.101249	0.0699266	0.822527	1	0.000626186	0.00314152	0.000944577	0.99574	3.32585		3.32585	2.94884
86	1.10828	0.0859463	0.131005	-0.00523467	0.00367956	1.10997	0.0924963	0.132131	0.000871092	0.00798293	0.00719204	0.119041	0.0833325	1	0.00780095		0.12354	0.0848816	1	1.21622	0.00641409	0.101577	0.0697912	0.822218	1	0.000219893	0.00351695	0.00109975	0.995322	3.19794		3.19794
86.2	1.09985	0.0853186	0.130302	-0.00550766	0.0036818	1.10154	0.0918686	0.131428	0.0005981	0.00798517	0.00724909	0.119313	0.0834001	1	0.00786283		0.123822	0.0849504	1	1.21664	0.00646277	0.101774	0.0698241	0.821939	1	0.000415084	0.00375585	0.00116611	0.994962	3.22085		3.22085
86.4	1.10153	0.0858046	0.130774	-0.00534534	0.00383205	1.10322	0.0923546	0.1319	0.00076042	0.00813541	0.00737423	0.119559	0.0837135	1	0.00799858		0.124078	0.0852697	1	1.21735	0.0065705	0.101925	0.0700456	0.821459	1	0.0013485	0.00396823	0.00131164	0.994345	3.02539		3.02539
86.6	1.10415	0.0860325	0.130752	-0.00561836	0.00362567	1.10584	0.0925825	0.131878	0.000487401	0.00792904	0.00717017	0.119257	0.0837216	1	0.00777723		0.123764	0.0852779	1	1.21682	0.00639144	0.101711	0.0700827	0.821815	1	0.00138522	0.00370784	0.0010737	0.994833	3.45333		3.45333
86.8	1.11172	0.0860175	0.131798	-0.0054047	0.00390276	1.1134	0.0925675	0.132924	0.000701057	0.00820613	0.00737031	0.119385	0.0831392	1	0.00799432		0.123897	0.0846847	1	1.21658	0.00657116	0.101841	0.0696091	0.821979	1	-0.000373965	0.00381637	0.00130785	0.99498	2.91805		2.91805
87	1.06518	0.0823899	0.126039	-0.0054326	0.00347632	1.06687	0.0889399	0.127165	0.000673164	0.00777968	0.00729205	0.119195	0.0833652	1	0.00790944		0.1237	0.0849149	1	1.21652	0.00650167	0.101683	0.0698012	0.822014	1	0.000312253	0.00364984	0.00121641	0.995047	3.00051		3.00051
87.2	1.08589	0.0842511	0.128608	-0.00553283	0.00366292	1.08758	0.0908011	0.129734	0.000572927	0.00796629	0.00732479	0.119287	0.0834893	1	0.00794495		0.123795	0.0850413	1	1.21678	0.00652948	0.10174	0.0698903	0.82184	1	0.000682454	0.00373	0.00125443	0.994826	2.97347		2.97347
87.4	1.13455	0.0885292	0.134814	-0.0050986	0.00376337	1.13623	0.0950792	0.135941	0.00100716	0.00806674	0.00709954	0.119641	0.0836792	1	0.00770062		0.124163	0.0852347	1	1.2171	0.00632703	0.102016	0.0700311	0.821626	1	0.00124909	0.00405103	0.000991014	0.99461	4.08776		4.08776
87.6	1.17258	0.0916046	0.138868	-0.00525471	0.00427107	1.17427	0.0981547	0.139994	0.00085105	0.00857444	0.00730193	0.119218	0.0835878	1	0.00792016		0.123724	0.0851417	1	1.21679	0.00650908	0.101681	0.0699726	0.821837	1	0.000981205	0.00366949	0.0012277	0.99483	2.98892		2.98892
87.8	1.19623	0.0933125	0.141806	-0.00553689	0.00438324	1.19792	0.0998625	0.142932	0.000568871	0.00868661	0.00725139	0.119317	0.083363	1	0.00786533	0.00787744	0.123826	0.0849127	1	1.2166	0.00646499	0.10178	0.0697949	0.82196	1	0.000303622	0.00375922	0.00116883	0.994987	3.21623		3.21623	3.20825
88	1.2528	0.0980572	0.148097	-0.00535199	0.00475178	1.25449	0.104607	0.149223	0.000753766	0.00905515	0.00721818	0.118951	0.0833861	1	0.00782931		0.123447	0.0849362	1	1.21621	0.00643746	0.101501	0.0698367	0.822225	1	0.000383112	0.00343647	0.00113031	0.995327	3.04028		3.04028
88.2	1.16105	0.0901404	0.136931	-0.00539742	0.00412455	1.16274	0.0966904	0.138057	0.000708343	0.00842791	0.00724831	0.118734	0.0831573	1	0.00786199		0.123221	0.0847031	1	1.21579	0.00646659	0.101351	0.0696694	0.822513	1	-0.000300844	0.00324355	0.0011659	0.995674	2.78201		2.78201
88.4	1.17005	0.0913607	0.138497	-0.00532292	0.00422582	1.17174	0.0979107	0.139623	0.000782843	0.00852918	0.0072791	0.119159	0.0835604	1	0.00789539		0.123663	0.0851137	1	1.21667	0.00648934	0.10164	0.0699562	0.821914	1	0.00090068	0.00361815	0.00120112	0.99493	3.01232		3.01232
88.6	1.19443	0.0934867	0.141616	-0.00519049	0.00429256	1.19612	0.100037	0.142742	0.000915268	0.00859593	0.00718651	0.119338	0.0836343	1	0.00779496		0.123848	0.085189	1	1.21683	0.00640594	0.101779	0.0700089	0.821806	1	0.0011202	0.00377915	0.0010928	0.994816	3.45824		3.45824
88.8	1.19761	0.0932785	0.141437	-0.00552813	0.00423956	1.1993	0.0998285	0.142563	0.000577634	0.00854293	0.00712328	0.118873	0.0832392	1	0.00772638		0.123365	0.0847866	1	1.21588	0.00635456	0.101462	0.0697328	0.822451	1	-5.50498e-05	0.00337058	0.00101963	0.995625	3.30569		3.30569
89	1.18458	0.0923945	0.139881	-0.00548604	0.00437476	1.18626	0.0989445	0.141007	0.000619723	0.00867813	0.00731551	0.118867	0.0834085	1	0.00793488		0.123359	0.084959	1	1.21625	0.00652403	0.101426	0.0698531	0.822197	1	0.000450541	0.00335822	0.00124403	0.995272	2.69946		2.69946
89.2	1.17859	0.0920716	0.139059	-0.0054079	0.00428067	1.18028	0.0986217	0.140185	0.000697855	0.00858404	0.00727287	0.118772	0.0835577	1	0.00788863		0.123261	0.085111	1	1.21626	0.00648597	0.101345	0.0699776	0.822192	1	0.000902909	0.00327586	0.00119417	0.995279	2.74322		2.74322
89.4	1.15275	0.0897263	0.136233	-0.00543731	0.00375191	1.15444	0.0962763	0.137359	0.000668444	0.00805528	0.00697765	0.118984	0.0833965	1	0.00756841		0.12348	0.0849468	1	1.216	0.00622404	0.101547	0.0698578	0.822371	1	0.000418707	0.00347367	0.000849262	0.99556	4.09021		4.09021
89.6	1.15699	0.0902102	0.136494	-0.00522344	0.00406921	1.15868	0.0967602	0.137621	0.000882321	0.00837258	0.00722598	0.118774	0.0835092	1	0.00783777		0.123263	0.0850616	1	1.21616	0.00644467	0.101354	0.0699426	0.822259	1	0.000757852	0.00327896	0.00113944	0.995371	2.8777		2.8777
89.8	1.18411	0.0923544	0.140073	-0.00532627	0.00431603	1.18579	0.0989044	0.1412	0.000779491	0.0086194	0.00726888	0.119076	0.0834077	1	0.0078843	0.0078222	0.123576	0.0849583	1	1.21642	0.00648157	0.10159	0.0698429	0.822085	1	0.000443873	0.00354535	0.0011894	0.995142	2.98078		2.98078	3.09899
90	1.11812	0.0868772	0.131597	-0.00547652	0.00371884	1.11981	0.0934272	0.132723	0.00062924	0.0080222	0.00716388	0.118523	0.0834311	1	0.00777041		0.123002	0.084982	1	1.21575	0.00639143	0.101174	0.0699006	0.822534	1	0.000530605	0.00305851	0.00106715	0.995727	2.86606		2.86606
90.2	1.14127	0.0886536	0.134542	-0.0053666	0.00376708	1.14296	0.0952036	0.135668	0.000739163	0.00807045	0.00706099	0.118698	0.0832955	1	0.00765881		0.123185	0.0848439	1	1.21569	0.00629999	0.101329	0.0697909	0.82258	1	0.000119994	0.00321829	0.000946903	0.995801	3.39875		3.39875
90.4	1.17324	0.0914332	0.138412	-0.00540005	0.0040192	1.17493	0.0979832	0.139539	0.000705705	0.00832256	0.00708348	0.118764	0.0833953	1	0.00768321		0.123252	0.0849455	1	1.21588	0.00631904	0.101369	0.0698633	0.822449	1	0.000418265	0.00327522	0.000973063	0.995635	3.36588		3.36588
90.6	1.16544	0.0906296	0.136931	-0.00555899	0.00398304	1.16713	0.0971796	0.138057	0.000546773	0.00828641	0.0070998	0.118288	0.0832635	1	0.0077009		0.122758	0.0848114	1	1.21527	0.00633678	0.101013	0.0697881	0.822862	1	3.35108e-05	0.00285274	0.000992554	0.996145	2.87415		2.87415
90.8	1.14392	0.0888678	0.134154	-0.00545349	0.00381208	1.14561	0.0954178	0.13528	0.000652269	0.00811545	0.00708394	0.118085	0.0832898	1	0.00768371		0.122548	0.0848381	1	1.21507	0.00632368	0.100857	0.0698216	0.822998	1	0.000118132	0.00267372	0.000974128	0.996319	2.74473		2.74473
91	1.14435	0.0891742	0.134915	-0.00537023	0.00390244	1.14604	0.0957242	0.136041	0.000735527	0.0082058	0.00716016	0.118706	0.0835263	1	0.00776638		0.123192	0.085079	1	1.21604	0.00638662	0.101306	0.0699641	0.822343	1	0.000812556	0.00322089	0.00106258	0.99549	3.03119		3.03119
91.2	1.13605	0.0883343	0.133512	-0.00533934	0.00361065	1.13774	0.0948844	0.134638	0.000766423	0.00791401	0.00695591	0.118338	0.0833973	1	0.00754483		0.122811	0.0849476	1	1.2153	0.00620819	0.101054	0.0698983	0.82284	1	0.000437947	0.00290208	0.000824193	0.996152	3.52112		3.52112
91.4	1.15891	0.0903633	0.136393	-0.00548358	0.00405954	1.1606	0.0969133	0.137519	0.000622176	0.0083629	0.00720567	0.11849	0.0835028	1	0.00781574		0.122968	0.085055	1	1.21584	0.00642827	0.101138	0.0699559	0.822478	1	0.000746289	0.00302754	0.00111594	0.995649	2.713		2.713
91.6	1.18735	0.0927662	0.139162	-0.00534921	0.00399551	1.18904	0.0993162	0.140289	0.000756549	0.00829888	0.00697946	0.117984	0.0835262	1	0.00757038		0.122444	0.0850789	1	1.21509	0.00623029	0.100769	0.0700184	0.822982	1	0.000834872	0.00258714	0.000851832	0.996329	3.03715		3.03715
91.8	1.21452	0.0947685	0.142182	-0.0054411	0.00432141	1.21621	0.101319	0.143309	0.000664659	0.00862478	0.00709154	0.117833	0.0833069	1	0.00769194	0.00768863	0.122286	0.0848556	1	1.21483	0.00633169	0.100661	0.0698495	0.823158	1	0.000175943	0.00244885	0.000983156	0.996519	2.4908		2.4908	3.00428
92	1.22915	0.0961475	0.144264	-0.00523426	0.00412278	1.23084	0.102697	0.14539	0.000871503	0.00842614	0.00684587	0.118123	0.0834371	1	0.00742548		0.122588	0.0849882	1	1.215	0.0061115	0.100895	0.0699491	0.823044	1	0.000565943	0.00271497	0.000695581	0.996432	3.90317		3.90317
92.2	1.1945	0.0933524	0.139752	-0.0053647	0.00392373	1.19619	0.0999024	0.140878	0.000741055	0.00822709	0.00687773	0.117772	0.083517	1	0.00746004		0.122223	0.0850695	1	1.21475	0.0061412	0.100615	0.0700303	0.823213	1	0.00081484	0.00240181	0.000732953	0.996638	3.27689		3.27689
92.4	1.22943	0.096108	0.143746	-0.00539736	0.00424684	1.23112	0.102658	0.144873	0.000708402	0.0085502	0.00694505	0.117675	0.0833858	1	0.00753306		0.122123	0.0849359	1	1.21459	0.00620213	0.100546	0.0699296	0.823322	1	0.000420624	0.00231418	0.00081184	0.996757	2.85054		2.85054
92.6	1.21566	0.0948604	0.141778	-0.00546276	0.00414897	1.21734	0.10141	0.142904	0.000642996	0.00845234	0.00694326	0.11739	0.0833046	1	0.00753111		0.121827	0.0848532	1	1.21421	0.00620247	0.100334	0.0698834	0.82358	1	0.000183482	0.0020607	0.000809938	0.997078	2.54427		2.54427
92.8	1.20175	0.0934762	0.139846	-0.00531107	0.00400119	1.20344	0.100026	0.140972	0.000794691	0.00830456	0.00690067	0.117141	0.0831167	1	0.00748492		0.121568	0.0846618	1	1.21371	0.00616695	0.100162	0.0697543	0.823917	1	-0.000375831	0.00184087	0.000760333	0.997503	2.42113		2.42113
93	1.06357	0.0821265	0.123764	-0.00531981	0.0028556	1.06526	0.0886766	0.124891	0.000785945	0.00715897	0.00672041	0.11724	0.0832442	1	0.0072894		0.121671	0.0847917	1	1.21375	0.00600567	0.100244	0.0698592	0.823892	1	9.90228e-06	0.00193485	0.000549163	0.997513	3.52327		3.52327
93.2	1.11106	0.0863041	0.129698	-0.0052793	0.00332054	1.11275	0.0928541	0.130824	0.000826463	0.0076239	0.0068514	0.117568	0.0834456	1	0.00743148		0.122012	0.0849968	1	1.21444	0.00611927	0.100467	0.0699885	0.823425	1	0.000605564	0.00222197	0.00070228	0.996907	3.16394		3.16394
93.4	1.13533	0.0880721	0.132704	-0.00530724	0.00349593	1.13702	0.0946221	0.13383	0.000798521	0.00779929	0.0068594	0.117702	0.0832192	1	0.00744015		0.122151	0.0847662	1	1.21436	0.00612683	0.100589	0.0698033	0.823481	1	-8.02941e-05	0.00234112	0.000711716	0.996969	3.2894		3.2894
93.6	1.15166	0.089469	0.133579	-0.00542589	0.00349699	1.15335	0.0960191	0.134705	0.000679872	0.00780036	0.00676323	0.116795	0.0832524	1	0.00733584		0.121209	0.0848	1	1.21335	0.00604596	0.0998967	0.0698895	0.824168	1	4.49701e-05	0.00153779	0.000599438	0.99785	2.56538		2.56538
93.8	1.15302	0.0897602	0.134011	-0.00540117	0.00361676	1.15471	0.0963103	0.135137	0.000704594	0.00792013	0.00685898	0.117031	0.0834065	1	0.0074397	0.00743712	0.121454	0.084957	1	1.21385	0.00612901	0.100057	0.0699896	0.823825	1	0.000501508	0.00174426	0.000711393	0.997405	2.45189		2.45189	2.99899
94	1.09084	0.0843561	0.126593	-0.00541747	0.00286018	1.09253	0.0909061	0.127719	0.000688292	0.00716355	0.00655684	0.116902	0.0832069	1	0.00711198		0.121321	0.0847537	1	1.21319	0.00586223	0.100002	0.0698604	0.824276	1	-9.06788e-05	0.00164021	0.000357653	0.998027	4.58603		4.58603
94.2	1.14502	0.0891057	0.13298	-0.00556294	0.00348956	1.14671	0.0956557	0.134106	0.000542817	0.00779293	0.00679589	0.116948	0.0834173	1	0.00737126		0.121368	0.084968	1	1.21371	0.00607334	0.099998	0.070007	0.823922	1	0.000537732	0.00167283	0.000637548	0.99754	2.62384		2.62384
94.4	1.15588	0.0900035	0.133917	-0.00539427	0.00339785	1.15757	0.0965535	0.135043	0.000711492	0.00770122	0.00665293	0.116661	0.0834107	1	0.0072162		0.12107	0.0849613	1	1.21325	0.00594784	0.09979	0.070028	0.824234	1	0.000528147	0.00142189	0.000470197	0.997961	3.02403		3.02403
94.6	1.16608	0.0909664	0.134954	-0.00534139	0.00347059	1.16777	0.0975165	0.13608	0.000764373	0.00777396	0.00665711	0.11653	0.0835067	1	0.00722073		0.120934	0.085059	1	1.21321	0.00595174	0.0996809	0.0701105	0.824257	1	0.000820938	0.00130521	0.000475082	0.997991	2.74735		2.74735
94.8	1.16945	0.090915	0.134942	-0.00559068	0.00316497	1.17114	0.097465	0.136068	0.000515077	0.00746834	0.006377	0.116185	0.0832226	1	0.00691692		0.120576	0.0847697	1	1.21226	0.00570579	0.0994636	0.0699269	0.824904	1	-2.12568e-05	0.00100722	0.000146858	0.998852	6.85845
95	1.19711	0.0931947	0.138192	-0.00534671	0.00356653	1.1988	0.0997447	0.139319	0.000759047	0.0078699	0.00656481	0.116215	0.0832038	1	0.00712062		0.120607	0.0847505	1	1.21248	0.00587278	0.0994717	0.0698986	0.824757	1	-8.29274e-05	0.00102801	0.000367076	0.998628	2.80054		2.80054
95.2	1.20842	0.0939613	0.139529	-0.00563993	0.00360395	1.21011	0.100511	0.140655	0.000465824	0.00790731	0.00653438	0.116234	0.0830598	1	0.00708762		0.120627	0.0846038	1	1.21232	0.00584634	0.0995008	0.0697868	0.824866	1	-0.000517521	0.00104566	0.000331442	0.998767	3.15487		3.15487
95.4	1.21891	0.095224	0.140575	-0.00537746	0.00371403	1.2206	0.101774	0.141701	0.000728295	0.0080174	0.00656843	0.116092	0.0833805	1	0.00712454		0.12048	0.0849305	1	1.21253	0.00587575	0.0993617	0.0700438	0.824719	1	0.000453601	0.000918028	0.000371275	0.998584	2.47264		2.47264
95.6	1.19901	0.0935047	0.138283	-0.00545224	0.00358085	1.2007	0.100055	0.139409	0.00065352	0.00788422	0.00656633	0.116106	0.08333	1	0.00712227		0.120494	0.0848791	1	1.2125	0.00587406	0.0993771	0.0700036	0.824745	1	0.000300969	0.000930836	0.000368835	0.998617	2.52372		2.52372
95.8	1.20024	0.0934706	0.1382	-0.00518406	0.00320932	1.20193	0.100021	0.139326	0.000921696	0.00751269	0.00625051	0.115919	0.0832166	1	0.00677971	0.00710719	0.1203	0.0847635	1	1.21184	0.00559455	0.0992701	0.069946	0.825189	1	-3.01519e-05	0.000774182	-1.55516e-06	0.999236	-497.814			2.99163
96	1.17968	0.0919866	0.135757	-0.00539144	0.0032636	1.18137	0.0985366	0.136883	0.000714315	0.00756696	0.00640527	0.115868	0.0834091	1	0.00694757		0.120248	0.0849596	1	1.21215	0.00573159	0.0992015	0.0700897	0.824977	1	0.000549084	0.000724108	0.000179965	0.998943	4.02361		4.02361
96.2	1.18133	0.0918758	0.135711	-0.00550053	0.00351121	1.18302	0.0984258	0.136838	0.000605233	0.00781458	0.00660564	0.115669	0.083199	1	0.00716491		0.12004	0.0847457	1	1.21195	0.00591188	0.0990471	0.069925	0.825116	1	-8.42187e-05	0.000539571	0.000415033	0.999069	1.30007		1.30007
96.4	1.19901	0.0933643	0.137849	-0.00545883	0.00352997	1.2007	0.0999143	0.138975	0.00064693	0.00783334	0.00652398	0.115745	0.0832134	1	0.00707633		0.120119	0.0847603	1	1.21196	0.00583877	0.099112	0.0699368	0.825112	1	-4.11394e-05	0.000610249	0.000319241	0.999082	1.91156		1.91156
96.6	1.19019	0.0926745	0.136596	-0.00527378	0.0034246	1.19188	0.0992245	0.137722	0.000831983	0.00772796	0.00648386	0.115551	0.0832507	1	0.00703282		0.119918	0.0847983	1	1.21175	0.00580386	0.0989627	0.0699801	0.825253	1	7.73035e-05	0.000438481	0.000272186	0.999268	1.61096		1.61096
96.8	1.15447	0.0893395	0.132172	-0.00555275	0.00293083	1.15616	0.0958895	0.133298	0.000553012	0.0072342	0.0062571	0.115294	0.0829381	1	0.00678686		0.119652	0.0844799	1	1.21092	0.00560472	0.0988107	0.0697651	0.825819	1	-0.000856108	0.000216999	6.06322e-06	1.00002	35.7894
97	1.17089	0.0910627	0.134277	-0.00546323	0.00328775	1.17258	0.0976127	0.135403	0.000642534	0.00759112	0.00647388	0.115475	0.0832464	1	0.007022		0.119839	0.084794	1	1.21166	0.00579537	0.0989056	0.0699819	0.825317	1	6.6616e-05	0.000371364	0.000260482	0.99935	1.42568		1.42568
97.2	1.16145	0.0903878	0.13319	-0.00539474	0.00314062	1.16314	0.0969378	0.134316	0.000711017	0.00744399	0.00639992	0.115478	0.0833417	1	0.00694178		0.119842	0.084891	1	1.21168	0.00572907	0.0989062	0.0700609	0.825304	1	0.000355983	0.000376074	0.000173692	0.999351	2.16518		2.16518
97.4	1.1665	0.0909651	0.133462	-0.00539123	0.00308782	1.16819	0.0975151	0.134588	0.000714531	0.00739118	0.00632706	0.115211	0.0834757	1	0.00686274		0.119565	0.0850275	1	1.21146	0.00566488	0.0986956	0.0701862	0.825453	1	0.000769124	0.00014036	8.81555e-05	0.999557	1.59219
97.6	1.18714	0.0926541	0.136358	-0.00528269	0.00336071	1.18883	0.0992041	0.137485	0.000823066	0.00766408	0.00644673	0.115647	0.0834468	1	0.00699255		0.120018	0.084998	1	1.21201	0.00576939	0.0990238	0.0701299	0.825077	1	0.000667703	0.000525309	0.000228587	0.99906	2.29806		2.29806
97.8	1.14864	0.0889086	0.131304	-0.0055898	0.00287921	1.15033	0.0954587	0.13243	0.000515954	0.00718257	0.00624393	0.115124	0.0829837	1	0.00677257	0.00696001	0.119475	0.0845264	1	1.21077	0.00559359	0.0986763	0.0698119	0.825918	1	-0.000713675	6.50806e-05	-9.43925e-06	1.00014	-6.89468			2.10502
98	1.17111	0.0913955	0.134517	-0.00540432	0.0032723	1.1728	0.0979455	0.135643	0.000701437	0.00757566	0.00645947	0.115658	0.0835144	1	0.00700637		0.120029	0.0850668	1	1.2121	0.00578034	0.0990255	0.0701812	0.825013	1	0.00087123	0.000534648	0.00024352	0.998979	2.19549		2.19549
98.2	1.16135	0.0902648	0.133089	-0.00540935	0.00312261	1.16303	0.0968149	0.134216	0.000696414	0.00742597	0.006385	0.115401	0.0832434	1	0.00692559		0.119763	0.0847909	1	1.21148	0.00571664	0.0988567	0.0699895	0.825437	1	6.11648e-05	0.000308385	0.000156194	0.999518	1.97437
98.4	1.16034	0.0901739	0.13285	-0.00522294	0.00306657	1.16203	0.0967239	0.133976	0.000882818	0.00736994	0.00634228	0.115295	0.0832368	1	0.00687925		0.119652	0.0847841	1	1.21132	0.00567916	0.0987786	0.0699934	0.825549	1	4.47489e-05	0.000214386	0.000106043	0.999667	2.02169
98.6	1.14548	0.0889012	0.130969	-0.00551434	0.00300809	1.14717	0.0954512	0.132095	0.000591415	0.00731145	0.00637348	0.115149	0.083206	1	0.00691309		0.119501	0.0847527	1	1.21117	0.0057078	0.0986662	0.0699761	0.82565	1	-4.52266e-05	8.37413e-05	0.000142659	0.999786	0.587002
98.8	1.18747	0.0928659	0.136182	-0.00537929	0.00321993	1.18916	0.0994159	0.137308	0.00072647	0.00752329	0.00632657	0.115467	0.083602	1	0.00686221		0.119831	0.0851561	1	1.21185	0.0056626	0.0988826	0.0702695	0.825185	1	0.00114362	0.000368495	8.76018e-05	0.999226	4.20647
99	1.18669	0.0923352	0.13594	-0.00542283	0.00311919	1.18838	0.0988853	0.137066	0.000682926	0.00742256	0.00624596	0.115339	0.0832103	1	0.00677477		0.119698	0.0847572	1	1.21123	0.0055933	0.0988236	0.0699761	0.825607	1	-3.43013e-05	0.0002572	-7.01129e-06	0.999759	-36.6837
99.2	1.17324	0.0913686	0.134452	-0.00544623	0.00331008	1.17493	0.0979186	0.135578	0.000659532	0.00761345	0.00647994	0.115393	0.0833403	1	0.00702857		0.119754	0.0848895	1	1.21167	0.00580072	0.0988335	0.0700598	0.825306	1	0.00035206	0.000297519	0.000267573	0.999337	1.11192		1.11192
99.4	1.158	0.089705	0.132479	-0.00561621	0.00293879	1.15969	0.096255	0.133605	0.000489547	0.00724215	0.00624489	0.115207	0.0830004	1	0.00677361		0.119562	0.0845433	1	1.21088	0.00559396	0.0987395	0.0698198	0.825847	1	-0.000665511	0.000139796	-8.29779e-06	1.00005	-16.8474
99.6	1.15177	0.0897613	0.13192	-0.0053456	0.00333616	1.15346	0.0963113	0.133046	0.000760163	0.00763953	0.00662315	0.115345	0.0834979	1	0.00718391		0.119705	0.0850501	1	1.21194	0.00592761	0.0987712	0.0701769	0.825124	1	0.000826197	0.000250613	0.000435523	0.999084	0.575431		0.575431
99.8	1.17375	0.0912424	0.134459	-0.00548921	0.00306498	1.17543	0.0977924	0.135585	0.000616548	0.00736835	0.00626861	0.115349	0.0831968	1	0.00679935	0.00691467	0.119709	0.0847434	1	1.21125	0.00561349	0.0988305	0.0699635	0.825593	1	-7.57474e-05	0.000265382	1.95868e-05	0.999736	13.549			1.29428
100	1.11964	0.0866647	0.128212	-0.0052169	0.00284156	1.12133	0.0932147	0.129338	0.000888862	0.00714493	0.00637185	0.115344	0.0831289	1	0.00691132		0.119703	0.0846742	1	1.21129	0.00570576	0.0988228	0.0699043	0.825567	1	-0.00028305	0.000257213	0.000140762	0.999681	1.82729
100.2	1.15854	0.0901715	0.132694	-0.00547406	0.00307644	1.16023	0.0967215	0.133821	0.000631698	0.00737981	0.00636067	0.11534	0.0833644	1	0.0068992		0.119699	0.0849141	1	1.21151	0.0056947	0.0988016	0.0700893	0.825414	1	0.000428805	0.000254497	0.000127616	0.999499	1.99423
100.4	1.17945	0.0917676	0.135292	-0.00518814	0.00306831	1.18114	0.0983176	0.136418	0.000917622	0.00737167	0.00624117	0.115497	0.0832399	1	0.00676958		0.119862	0.0847872	1	1.21142	0.00558814	0.0989436	0.06999	0.825478	1	5.1047e-05	0.000398374	-1.26017e-05	0.9996	-31.6126
100.6	1.15063	0.0892447	0.131779	-0.00532756	0.00314193	1.15232	0.0957947	0.132905	0.000778199	0.00744529	0.00646113	0.115337	0.0831321	1	0.00700817		0.119696	0.0846775	1	1.21138	0.00578527	0.0988097	0.0699016	0.825503	1	-0.000275068	0.000248745	0.000245553	0.999582	1.013		1.013
100.8	1.17561	0.0913817	0.134431	-0.00544699	0.00320461	1.1773	0.0979318	0.135557	0.000658764	0.00750797	0.00637727	0.115142	0.0831832	1	0.0069172		0.119494	0.0847295	1	1.21114	0.00571131	0.0986623	0.0699584	0.825668	1	-0.000114081	7.7387e-05	0.000147104	0.999807	0.526071
101	1.1572	0.0899623	0.132432	-0.00546716	0.00314053	1.15888	0.0965123	0.133558	0.0006386	0.0074439	0.00642333	0.115247	0.0832803	1	0.00696716		0.119603	0.0848285	1	1.2114	0.00575134	0.098731	0.0700252	0.825492	1	0.000175843	0.000169317	0.00020116	0.999581	0.841706		0.841706
101.2	1.15528	0.0899359	0.132151	-0.0054367	0.00286441	1.15697	0.0964859	0.133277	0.000669063	0.00716778	0.00619531	0.115195	0.0833954	1	0.00671984		0.119549	0.0849457	1	1.21121	0.00554802	0.0987017	0.0701327	0.825618	1	0.000529824	0.000130492	-6.64953e-05	0.999789	-1.96242
101.4	1.17101	0.0910752	0.134303	-0.00548753	0.00307945	1.1727	0.0976253	0.135429	0.000618224	0.00738281	0.00629558	0.115485	0.0832484	1	0.0068286		0.11985	0.084796	1	1.21147	0.0056366	0.0989289	0.069994	0.82544	1	7.61764e-05	0.000386024	5.126e-05	0.999542	7.5307
101.6	1.16526	0.0906575	0.13335	-0.00542039	0.00306799	1.16694	0.0972075	0.134476	0.000685365	0.00737136	0.0063168	0.115238	0.0833009	1	0.00685162		0.119593	0.0848494	1	1.21129	0.00565645	0.0987315	0.0700486	0.825563	1	0.000240556	0.000164326	7.61315e-05	0.999693	2.15845
101.8	1.14215	0.0885082	0.130756	-0.00558446	0.00298094	1.14384	0.0950582	0.131883	0.000521297	0.00728431	0.0063683	0.115298	0.0831045	1	0.00690748	0.00687802	0.119656	0.0846494	1	1.21121	0.00570294	0.0987901	0.0698882	0.825619	1	-0.000355428	0.000216916	0.000136601	0.999745	1.58796			0.927353
102	1.09987	0.0849426	0.125844	-0.00554262	0.00269217	1.10155	0.0914927	0.12697	0.000563143	0.00699553	0.00635061	0.115265	0.0830578	1	0.00688828		0.119621	0.0846018	1	1.21111	0.00568757	0.0987697	0.0698547	0.825688	1	-0.000495396	0.000187582	0.000115831	0.999834	1.61944
102.2	1.14157	0.0888926	0.13124	-0.00544763	0.00311101	1.14326	0.0954426	0.132366	0.000658132	0.00741438	0.00648529	0.11578	0.0834828	1	0.00703437		0.120156	0.0850347	1	1.21222	0.00580286	0.0991199	0.0701476	0.82493	1	0.000772236	0.00064253	0.0002738	0.998869	2.34672		2.34672
102.4	1.17527	0.0912432	0.134593	-0.00557092	0.0032148	1.17695	0.0977932	0.135719	0.000534843	0.00751816	0.00638782	0.115314	0.0830901	1	0.00692864		0.119672	0.0846347	1	1.21124	0.00572031	0.0988017	0.0698747	0.825603	1	-0.000399789	0.000230244	0.000159509	0.999722	1.44345
102.6	1.20602	0.0940027	0.138035	-0.00535041	0.00355059	1.20771	0.100553	0.139161	0.000755352	0.00785396	0.00650316	0.115227	0.0832588	1	0.00705376		0.119582	0.0848065	1	1.21144	0.00582261	0.0987105	0.0700046	0.825462	1	0.000109612	0.000149106	0.000294849	0.999526	0.505703		0.505703
102.8	1.16045	0.0903022	0.132691	-0.00528554	0.00281131	1.16214	0.0968522	0.133817	0.000820221	0.00711468	0.00612203	0.115147	0.0833393	1	0.00664036		0.119499	0.0848886	1	1.21103	0.00548324	0.0986758	0.0700963	0.825745	1	0.000363137	8.99664e-05	-0.000152546	0.999962	-0.589767
103	1.15082	0.0893288	0.131547	-0.00544368	0.00309244	1.15251	0.0958788	0.132673	0.000662075	0.0073958	0.00641712	0.115116	0.0831913	1	0.00696043		0.119467	0.0847378	1	1.21117	0.00574689	0.0986381	0.0699638	0.825651	1	-8.96948e-05	5.29577e-05	0.000193889	0.999778	0.273134		0.273134
103.2	1.17706	0.0917866	0.134871	-0.00526844	0.00325718	1.17875	0.0983367	0.135998	0.000837318	0.00756055	0.00641404	0.115375	0.0834246	1	0.00695709		0.119735	0.0849754	1	1.21167	0.00574175	0.0988184	0.0701309	0.825309	1	0.000608464	0.000283451	0.000190238	0.999357	1.48998		1.48998
103.4	1.16195	0.0903647	0.132817	-0.00549549	0.00322426	1.16364	0.0969148	0.133943	0.000610269	0.00752762	0.00646904	0.115107	0.083286	1	0.00701675		0.119458	0.0848343	1	1.21131	0.0057927	0.0986187	0.0700352	0.825553	1	0.000195712	4.32399e-05	0.000254807	0.999647	0.169696		0.169696
103.6	1.14832	0.0892746	0.131179	-0.00535818	0.00287472	1.15001	0.0958246	0.132305	0.000747578	0.00717809	0.00624176	0.115047	0.083325	1	0.00677022		0.119395	0.084874	1	1.21104	0.00559042	0.098589	0.0700836	0.825737	1	0.000319843	-3.32101e-06	-1.20011e-05	0.999926	0.276724
103.8	1.15662	0.0897951	0.132504	-0.00551689	0.003014	1.15831	0.0963451	0.13363	0.000588872	0.00731736	0.00631728	0.115366	0.0831774	1	0.00685214	0.0069102	0.119727	0.0847237	1	1.2113	0.00565684	0.0988413	0.0699443	0.825558	1	-0.000135855	0.000279436	7.67177e-05	0.999682	3.64239			0.957047
104	1.12722	0.0874856	0.128911	-0.00532616	0.00287911	1.1289	0.0940356	0.130037	0.000779595	0.00718248	0.00636235	0.115189	0.0832982	1	0.00690102		0.119542	0.0848467	1	1.21129	0.00569725	0.0986902	0.0700465	0.825566	1	0.000232617	0.00011958	0.000129583	0.999686	0.922806
104.2	1.08737	0.0841502	0.124047	-0.00532849	0.00255116	1.08906	0.0907002	0.125173	0.000777268	0.00685453	0.006294	0.114937	0.0832832	1	0.00682688		0.119281	0.0848314	1	1.21094	0.00563768	0.0985028	0.0700542	0.825805	1	0.000195128	-0.000103326	4.93207e-05	1	-2.09499
104.4	1.09128	0.0846699	0.125438	-0.00549027	0.00278121	1.09297	0.0912199	0.126565	0.000615491	0.00708458	0.00648194	0.115799	0.0834604	1	0.00703074		0.120175	0.0850119	1	1.21222	0.0057999	0.0991366	0.0701293	0.824934	1	0.000704308	0.000659412	0.000269876	0.998875	2.44339		2.44339
104.6	1.12333	0.0871504	0.129117	-0.00551835	0.00285752	1.12502	0.0937004	0.130243	0.000587413	0.00716089	0.00636514	0.11577	0.0832879	1	0.00690404		0.120145	0.0848362	1	1.21189	0.00569694	0.099139	0.0700035	0.825161	1	0.000186669	0.00063748	0.0001329	0.999178	4.79668
104.8	1.11905	0.0865611	0.128164	-0.00557765	0.00265995	1.12074	0.0931111	0.12929	0.000528104	0.00696331	0.00621316	0.115362	0.0830804	1	0.0067392		0.119722	0.0846248	1	1.21109	0.00556459	0.0988552	0.0698751	0.825705	1	-0.0004269	0.000278958	-4.55106e-05	0.999885	-6.12953
105	1.13366	0.0883521	0.129788	-0.00539512	0.00270976	1.13535	0.0949021	0.130914	0.000710642	0.00701313	0.00617706	0.115307	0.0835883	1	0.00670005		0.119665	0.0851422	1	1.21151	0.00553034	0.0987738	0.0702779	0.825418	1	0.00111	0.000231026	-8.78733e-05	0.999548	-2.62908
105.2	1.1472	0.0891756	0.131271	-0.00548117	0.00292138	1.14889	0.0957257	0.132397	0.000624584	0.00722475	0.00628848	0.11524	0.0833204	1	0.00682089		0.119595	0.0848693	1	1.21129	0.00563112	0.0987341	0.0700655	0.825569	1	0.000299921	0.000167297	4.28804e-05	0.999706	3.90148
105.4	1.15623	0.0896889	0.132392	-0.00541136	0.00311477	1.15792	0.096239	0.133518	0.000694395	0.00741813	0.00640646	0.115309	0.083114	1	0.00694886		0.119667	0.084659	1	1.21127	0.00573681	0.0987943	0.0698925	0.825576	1	-0.000328022	0.00022536	0.000181383	0.999685	1.24245		1.24245
105.6	1.1873	0.0925895	0.135674	-0.00536417	0.00333596	1.18899	0.0991396	0.1368	0.000741593	0.00763932	0.00642505	0.115056	0.0833813	1	0.00696903		0.119405	0.0849314	1	1.2113	0.00575333	0.0985751	0.0701156	0.825556	1	0.000485949	-1.0768e-06	0.000203163	0.999663	-0.00530018		-0.00530018
105.8	1.16151	0.0902507	0.133092	-0.005509	0.00299676	1.1632	0.0968007	0.134218	0.000596759	0.00730012	0.00627592	0.115388	0.0832196	1	0.00680727	0.0068648	0.119749	0.0847666	1	1.21132	0.0056197	0.0988578	0.0699786	0.825544	1	-8.07892e-06	0.000299632	2.81701e-05	0.999674	10.6366			1.22685
106	1.15339	0.0894727	0.132121	-0.00554711	0.00299094	1.15507	0.0960227	0.133247	0.000558654	0.0072943	0.00631501	0.115358	0.0831312	1	0.00684968		0.119718	0.0846766	1	1.21124	0.00565507	0.0988389	0.0699088	0.825597	1	-0.000275223	0.000272111	7.40545e-05	0.99973	3.67446
106.2	1.21179	0.0949	0.138741	-0.00534501	0.00326642	1.21348	0.10145	0.139867	0.000760746	0.00756979	0.00623809	0.115262	0.0836027	1	0.00676624		0.119618	0.0851569	1	1.21154	0.00558483	0.0987319	0.0702881	0.825395	1	0.00115336	0.000188245	-1.6253e-05	0.999507	-11.5821
106.4	1.15349	0.0895626	0.131676	-0.00544427	0.00308884	1.15518	0.0961127	0.132802	0.000661493	0.00739221	0.00639918	0.114962	0.0832014	1	0.00694097		0.119307	0.0847481	1	1.211	0.00573162	0.0985197	0.0699821	0.825767	1	-5.48221e-05	-8.42433e-05	0.000172815	0.999927	-0.487476		-0.487476
106.6	1.1262	0.0873164	0.128924	-0.00541905	0.00306886	1.12789	0.0938664	0.13005	0.000686711	0.00737223	0.00653631	0.115304	0.0832231	1	0.00708971		0.119662	0.0847702	1	1.21152	0.0058519	0.0987701	0.06997	0.825408	1	-8.01166e-07	0.000216885	0.000333741	0.99945	0.64986		0.64986
106.8	1.09927	0.0850376	0.125718	-0.00554262	0.00258797	1.10096	0.0915876	0.126845	0.000563134	0.00689134	0.00625939	0.115213	0.0831888	1	0.00678934		0.119567	0.0847353	1	1.21109	0.00560597	0.0987267	0.069966	0.825701	1	-9.63039e-05	0.000143993	8.73224e-06	0.999874	16.4898
107	1.1726	0.0912175	0.134574	-0.00540591	0.00321414	1.17429	0.0977675	0.1357	0.000699851	0.00751751	0.00640176	0.115559	0.0832568	1	0.00694376		0.119927	0.0848045	1	1.21168	0.00573071	0.0989761	0.0699894	0.825304	1	9.716e-05	0.000448809	0.000175858	0.999348	2.55211		2.55211
107.2	1.15385	0.0896086	0.132164	-0.00544042	0.00307799	1.15553	0.0961587	0.133291	0.000665337	0.00738135	0.00638783	0.11535	0.0832157	1	0.00692865		0.119709	0.0847627	1	1.2114	0.00571954	0.0988189	0.0699708	0.825491	1	-2.11613e-05	0.000262197	0.000159507	0.999584	1.6438
107.4	1.14362	0.0885223	0.130778	-0.00555429	0.00301198	1.14531	0.0950723	0.131905	0.000551467	0.00731534	0.00638723	0.11517	0.0830103	1	0.00692801		0.119523	0.0845535	1	1.211	0.00572088	0.0986971	0.069821	0.825761	1	-0.000637347	0.000101706	0.00015883	0.999917	0.640345
107.6	1.13016	0.087768	0.129272	-0.00534328	0.00302967	1.13184	0.094318	0.130398	0.000762475	0.00733304	0.00647884	0.115208	0.0833312	1	0.00702737		0.119563	0.0848803	1	1.21147	0.0058007	0.0986921	0.0700639	0.825443	1	0.000329449	0.000133137	0.000266287	0.999509	0.499974		0.499974
107.8	1.16087	0.0901628	0.132923	-0.00542102	0.00305939	1.16256	0.0967128	0.134049	0.000684742	0.00736276	0.00633324	0.115305	0.0831898	1	0.00686945	0.00691332	0.119663	0.0847362	1	1.21127	0.00567129	0.0987916	0.0699566	0.825581	1	-9.73843e-05	0.000224281	9.54448e-05	0.999707	2.34985			0.803618
108	1.18217	0.0920794	0.135514	-0.00534068	0.00323605	1.18386	0.0986294	0.13664	0.000765078	0.00753941	0.00636852	0.11542	0.083312	1	0.00690772		0.119782	0.0848608	1	1.21155	0.00570155	0.0988666	0.0700431	0.825389	1	0.000268415	0.000325261	0.000136848	0.999463	2.3768
108.2	1.21176	0.0944019	0.13869	-0.00546637	0.00351872	1.21345	0.100952	0.139817	0.000639386	0.00782209	0.00644615	0.115222	0.0831941	1	0.00699192		0.119577	0.0847407	1	1.21131	0.0057722	0.0987172	0.0699579	0.825553	1	-8.44433e-05	0.000146706	0.000227962	0.999649	0.643557		0.643557
108.4	1.17497	0.0914741	0.134393	-0.00537006	0.00310148	1.17665	0.0980241	0.135519	0.000735703	0.00740485	0.00629314	0.115174	0.0833074	1	0.00682595		0.119526	0.0848561	1	1.21121	0.00563565	0.0986836	0.070059	0.825622	1	0.00026244	0.000107997	4.83424e-05	0.999771	2.23401
108.6	1.19618	0.093317	0.136802	-0.00532535	0.00316339	1.19787	0.099867	0.137928	0.000780408	0.00746676	0.00623338	0.115145	0.0833706	1	0.00676113		0.119496	0.0849205	1	1.21118	0.00558227	0.0986614	0.0701139	0.825642	1	0.000455378	8.41392e-05	-2.18195e-05	0.999811	-3.85615
108.8	1.17443	0.0913261	0.13435	-0.00547479	0.00335259	1.17612	0.0978761	0.135476	0.000630971	0.00765596	0.00650952	0.115189	0.0832197	1	0.00706065		0.119543	0.0847668	1	1.21137	0.00582865	0.0986838	0.069976	0.825512	1	-7.49418e-06	0.000114936	0.00030232	0.999585	0.38018		0.38018
109	1.20026	0.0934677	0.137624	-0.00540239	0.00309517	1.20195	0.100018	0.13875	0.000703365	0.00739854	0.00615544	0.115437	0.0832128	1	0.00667659		0.1198	0.0847597	1	1.21124	0.00551221	0.0989073	0.0699778	0.825603	1	-2.74762e-05	0.000347792	-0.000113254	0.999773	-3.0709
109.2	1.19966	0.0934452	0.137413	-0.00525419	0.00341568	1.20135	0.0999952	0.138539	0.000851565	0.00771905	0.00642533	0.11532	0.0832359	1	0.00696933		0.119678	0.0847832	1	1.21143	0.00575297	0.0987908	0.069986	0.82547	1	3.98261e-05	0.00023432	0.000203513	0.999551	1.15138		1.15138
109.4	1.19631	0.0933005	0.137084	-0.00533758	0.00317328	1.198	0.0998506	0.138211	0.000768175	0.00747664	0.00624096	0.115368	0.083348	1	0.00676935		0.119729	0.0848974	1	1.2114	0.00558806	0.0988353	0.0700823	0.825494	1	0.000381124	0.000283527	-1.28702e-05	0.999623	-22.0298
109.6	1.18722	0.0927194	0.135968	-0.00535951	0.00326534	1.18891	0.0992694	0.137095	0.00074625	0.00756871	0.00636609	0.115311	0.0834962	1	0.00690508		0.119669	0.0850483	1	1.21162	0.00569904	0.0987679	0.0701937	0.825339	1	0.000827387	0.000228617	0.000133967	0.999407	1.70651
109.8	1.18021	0.0917644	0.135024	-0.00552017	0.00323444	1.1819	0.0983144	0.13615	0.000585588	0.00753781	0.0063777	0.115196	0.0831833	1	0.00691767	0.00687854	0.11955	0.0847296	1	1.2112	0.00571143	0.0987039	0.0699553	0.825629	1	-0.000115062	0.000125465	0.000147615	0.999759	0.84995			0.725038
110	1.20834	0.0946127	0.138669	-0.00523748	0.00335045	1.21003	0.101163	0.139795	0.000868282	0.00765381	0.00632531	0.11553	0.0836035	1	0.00686084		0.119896	0.0851577	1	1.21191	0.00566116	0.0989314	0.070267	0.82514	1	0.00114667	0.000424978	8.61263e-05	0.99917	4.93435
110.2	1.21774	0.0949544	0.139501	-0.00545459	0.00346355	1.21943	0.101504	0.140627	0.000651167	0.00776692	0.00636931	0.115322	0.0832392	1	0.00690856		0.11968	0.0847866	1	1.21138	0.00570307	0.0987971	0.069992	0.825508	1	5.0897e-05	0.000238002	0.000137766	0.99961	1.72758
110.4	1.20614	0.0941791	0.138452	-0.00546077	0.00313677	1.20783	0.100729	0.139579	0.000644992	0.00744014	0.00615994	0.115562	0.083397	1	0.00668147		0.119929	0.0849473	1	1.21156	0.00551478	0.0989878	0.0701141	0.825383	1	0.000525933	0.000458763	-0.000107917	0.999503	-4.25109
110.6	1.24218	0.0967784	0.141991	-0.00536856	0.00374718	1.24387	0.103328	0.143117	0.000737198	0.00805055	0.00647219	0.115058	0.0830702	1	0.00702016		0.119407	0.0846145	1	1.21104	0.0057968	0.0985984	0.0698692	0.825736	1	-0.000455238	-6.78509e-07	0.000258551	0.999869	-0.00262427		-0.00262427
110.8	1.18684	0.0922618	0.13567	-0.00539223	0.00320892	1.18853	0.0988118	0.136796	0.000713533	0.00751228	0.00632065	0.115097	0.0831379	1	0.00685579		0.119447	0.0846834	1	1.21099	0.00566133	0.0986361	0.0699293	0.825773	1	-0.000248608	3.87111e-05	8.06416e-05	0.99995	0.480039
111	1.19115	0.093026	0.136492	-0.00528425	0.00317132	1.19284	0.099576	0.137618	0.000821513	0.00747469	0.00626631	0.11537	0.0834783	1	0.00679685		0.119731	0.0850301	1	1.21156	0.00561001	0.0988238	0.0701825	0.825384	1	0.000774024	0.000284454	1.68786e-05	0.999483	16.8529
111.2	1.23129	0.0961367	0.141161	-0.00559596	0.00363482	1.23298	0.102687	0.142287	0.000509797	0.00793819	0.00643823	0.115402	0.0832836	1	0.00698333		0.119763	0.0848318	1	1.21158	0.00576383	0.0988489	0.0700176	0.82537	1	0.000181383	0.000306864	0.000218648	0.999424	1.40346		1.40346
111.4	1.21385	0.0947081	0.138868	-0.00518189	0.00339498	1.21554	0.101258	0.139994	0.000923873	0.00769835	0.00633328	0.11517	0.083303	1	0.00686949		0.119523	0.0848515	1	1.21124	0.00567143	0.098678	0.0700532	0.825597	1	0.000248172	0.000103905	9.54596e-05	0.999732	1.08847
111.6	1.20036	0.0933925	0.137012	-0.0054597	0.00340089	1.20205	0.0999425	0.138139	0.000646062	0.00770425	0.00640925	0.114919	0.0831432	1	0.00695189		0.119262	0.0846888	1	1.2109	0.00574108	0.0984904	0.0699386	0.82583	1	-0.000229767	-0.000122965	0.000184649	1	-0.665938		-0.665938
111.8	1.21153	0.0944613	0.138811	-0.00542647	0.00344488	1.21322	0.101011	0.139937	0.000679294	0.00774825	0.0063865	0.115343	0.0832588	1	0.00692722	0.00688556	0.119703	0.0848065	1	1.21144	0.00571819	0.0988106	0.0700049	0.825466	1	0.000109105	0.000256582	0.00015795	0.999555	1.62445			0.244966
112	1.21223	0.0944669	0.13849	-0.00526574	0.00360135	1.21392	0.101017	0.139617	0.000840014	0.00790471	0.00651173	0.115013	0.0832156	1	0.00706305		0.11936	0.0847625	1	1.21119	0.00583152	0.0985482	0.0699831	0.825637	1	-1.56989e-05	-4.20362e-05	0.000304931	0.999741	-0.137855		-0.137855
112.2	1.22307	0.0955257	0.139998	-0.0052299	0.00333961	1.22476	0.102076	0.141124	0.000875862	0.00764297	0.00624037	0.115226	0.0833432	1	0.00676871		0.119581	0.0848925	1	1.21124	0.00558824	0.0987256	0.0700872	0.825599	1	0.000370209	0.000156192	-1.35956e-05	0.999754	-11.4884
112.4	1.21303	0.0945423	0.138576	-0.00555313	0.00335955	1.21472	0.101092	0.139702	0.000552628	0.00766292	0.00630839	0.115008	0.0832229	1	0.0068425		0.119355	0.08477	1	1.21097	0.00565044	0.0985614	0.0700019	0.825786	1	1.09227e-05	-4.03255e-05	6.62341e-05	0.999971	-0.608834
112.6	1.20454	0.0939079	0.138194	-0.00538093	0.00347203	1.20623	0.100458	0.13932	0.00072483	0.0077754	0.00644604	0.115501	0.0832826	1	0.00699179		0.119866	0.0848308	1	1.21169	0.00577029	0.0989247	0.0700104	0.825295	1	0.000175742	0.000395026	0.000227804	0.999328	1.73406		1.73406
112.8	1.20404	0.093821	0.137823	-0.00522071	0.00343713	1.20573	0.100371	0.138949	0.000885045	0.0077405	0.00641977	0.115241	0.0832451	1	0.0069633		0.119596	0.0847926	1	1.21135	0.00574837	0.0987296	0.0699983	0.825524	1	6.97179e-05	0.000164087	0.000196987	0.99962	0.832987		0.832987
113	1.22592	0.0959104	0.140262	-0.00548805	0.00347278	1.22761	0.10246	0.141388	0.000617713	0.00777615	0.00633437	0.115173	0.0834631	1	0.00687067		0.119526	0.0850147	1	1.21141	0.00567163	0.0986667	0.0701782	0.825483	1	0.000731885	0.000106289	9.67284e-05	0.999593	1.09884
113.2	1.22397	0.0953973	0.140116	-0.00539116	0.00334498	1.22566	0.101947	0.141242	0.000714594	0.00764834	0.00624019	0.115238	0.0831776	1	0.00676852		0.119593	0.0847238	1	1.21109	0.0055888	0.0987487	0.0699569	0.825706	1	-0.000130567	0.000167051	-1.3804e-05	0.999883	-12.1016
113.4	1.15988	0.0900363	0.132227	-0.00532608	0.0030684	1.16157	0.0965863	0.133353	0.000779676	0.00737176	0.00634637	0.114804	0.0831515	1	0.00688369		0.119143	0.0846972	1	1.21072	0.0056856	0.0984066	0.0699558	0.825952	1	-0.000200704	-0.000223433	0.000110813	1.00017	-2.01631
113.6	1.18041	0.0920813	0.135088	-0.00532245	0.00318236	1.1821	0.0986313	0.136214	0.000783308	0.00748573	0.00633256	0.115231	0.0834371	1	0.0068687		0.119586	0.0849882	1	1.21144	0.00566986	0.0987134	0.0701545	0.825462	1	0.000651971	0.000157634	9.46082e-05	0.999566	1.66618
113.8	1.18568	0.0924853	0.135705	-0.00550915	0.00313257	1.18737	0.0990353	0.136831	0.00059661	0.00743594	0.00626252	0.115239	0.0834071	1	0.00679273	0.00688137	0.119594	0.0849576	1	1.21134	0.0056076	0.0987283	0.070135	0.825529	1	0.000562511	0.00016705	1.24066e-05	0.999664	13.4647			0.809732
114	1.18484	0.091744	0.135321	-0.00520687	0.00336727	1.18652	0.098294	0.136447	0.00089889	0.00767064	0.0064648	0.114997	0.082842	1	0.00701214		0.119344	0.084382	1	1.21074	0.00579163	0.098571	0.0696947	0.825943	1	-0.00114366	-5.47861e-05	0.000249923	1.00012	-0.219212		-0.219212
114.2	1.14658	0.0889859	0.130908	-0.00549617	0.00295261	1.14827	0.0955359	0.132034	0.000609591	0.00725598	0.00631907	0.114985	0.0832001	1	0.00685407		0.119331	0.0847468	1	1.21093	0.00566016	0.098545	0.0699847	0.82581	1	-5.76245e-05	-6.07349e-05	7.87655e-05	0.999998	-0.771085
114.4	1.18415	0.0921995	0.135641	-0.00537067	0.00310639	1.18584	0.0987495	0.136767	0.000735089	0.00740975	0.00624851	0.115333	0.0832737	1	0.00677754		0.119692	0.0848217	1	1.21129	0.0055953	0.0988136	0.0700259	0.825565	1	0.000157303	0.0002519	-4.0142e-06	0.999708	-62.7521
114.6	1.20789	0.0940549	0.138353	-0.00538279	0.00334259	1.20957	0.100605	0.139479	0.000722974	0.00764596	0.0063212	0.115313	0.0831738	1	0.00685638		0.119671	0.08472	1	1.21125	0.0056606	0.0987996	0.0699444	0.825595	1	-0.000145424	0.000231222	8.13045e-05	0.999728	2.8439
114.8	1.20027	0.0935097	0.137513	-0.00549592	0.00330375	1.20196	0.10006	0.13864	0.000609835	0.00760712	0.00632891	0.115344	0.0832469	1	0.00686475		0.119704	0.0847944	1	1.21136	0.00566696	0.0988174	0.0699992	0.825516	1	7.43175e-05	0.00025928	9.03559e-05	0.99963	2.86954
115	1.20736	0.0942429	0.138084	-0.00509696	0.00337608	1.20904	0.100793	0.13921	0.0010088	0.00767945	0.00635167	0.115141	0.0833657	1	0.00688943		0.119492	0.0849155	1	1.2113	0.00568765	0.0986483	0.0701029	0.825561	1	0.000438195	7.69052e-05	0.000117037	0.999684	0.657103
115.2	1.1871	0.092439	0.135519	-0.00541798	0.00348887	1.18879	0.098989	0.136645	0.000687777	0.00779224	0.00655477	0.114945	0.0832688	1	0.00710974		0.119289	0.0848167	1	1.21122	0.00586992	0.098487	0.0700261	0.825617	1	0.000145911	-0.000104622	0.000355435	0.999709	-0.29435		-0.29435
115.4	1.19451	0.0931425	0.136942	-0.00542817	0.00309632	1.1962	0.0996925	0.138068	0.000677591	0.00739969	0.00618599	0.115422	0.0833409	1	0.00670973		0.119785	0.0848902	1	1.21138	0.0055389	0.0988824	0.070077	0.825502	1	0.000359538	0.000333477	-7.73762e-05	0.999644	-4.30981
115.6	1.19233	0.0927965	0.136409	-0.00522379	0.00322016	1.19402	0.0993465	0.137536	0.000881968	0.00752352	0.00630099	0.115187	0.0832032	1	0.00683447		0.11954	0.0847499	1	1.21112	0.00564307	0.0987018	0.0699762	0.825679	1	-5.31556e-05	0.000119542	5.75668e-05	0.999838	2.07658
115.8	1.19675	0.0934605	0.137381	-0.00524702	0.00321683	1.19844	0.100011	0.138507	0.000858738	0.0075202	0.00627498	0.115573	0.0834505	1	0.00680625	0.00687145	0.119941	0.0850018	1	1.21175	0.00561688	0.0989817	0.070148	0.825253	1	0.00068461	0.000464959	2.70907e-05	0.999317	17.1631			-0.256781
116	1.2434	0.097244	0.142533	-0.0052309	0.00356754	1.24508	0.103794	0.143659	0.000874863	0.00787091	0.00632158	0.115381	0.083363	1	0.0068568		0.119742	0.0849127	1	1.21151	0.00565971	0.0988367	0.0700883	0.825415	1	0.000424462	0.000292195	8.17544e-05	0.999508	3.57405
116.2	1.23179	0.0961924	0.141394	-0.00534958	0.00367776	1.23348	0.102742	0.14252	0.000756183	0.00798113	0.00647041	0.115543	0.0832947	1	0.00701823		0.11991	0.0848431	1	1.21177	0.00579171	0.0989545	0.0700158	0.825238	1	0.000210684	0.000432265	0.000256396	0.999253	1.68593		1.68593
116.4	1.15827	0.0898875	0.132163	-0.00533268	0.00328093	1.15996	0.0964375	0.133289	0.000773077	0.0075843	0.0065384	0.114908	0.0831385	1	0.00709197		0.119251	0.084684	1	1.21103	0.00585617	0.0984709	0.0699274	0.825746	1	-0.000246644	-0.000136908	0.000336258	0.999869	-0.407151		-0.407151
116.6	1.16589	0.0906755	0.133431	-0.00512183	0.00301541	1.16758	0.0972255	0.134557	0.000983932	0.00731877	0.00626834	0.115245	0.0832711	1	0.00679905		0.119601	0.0848191	1	1.21122	0.0056134	0.098744	0.0700279	0.825615	1	0.000151333	0.000172577	1.92434e-05	0.999766	8.9681
116.8	1.15802	0.0902697	0.132427	-0.00539863	0.00317002	1.15971	0.0968198	0.133553	0.000707128	0.00747339	0.00644419	0.115161	0.0834862	1	0.00698979		0.119513	0.0850382	1	1.21154	0.00576934	0.0986457	0.0701901	0.825395	1	0.000799589	9.19232e-05	0.0002256	0.99946	0.407461		0.407461
117	1.16413	0.0906094	0.133281	-0.00535273	0.00310468	1.16582	0.0971594	0.134408	0.000753026	0.00740804	0.00635437	0.11529	0.0833401	1	0.00689237		0.119648	0.0848893	1	1.21143	0.00568945	0.0987657	0.0700737	0.825471	1	0.000356667	0.000210236	0.000120225	0.99957	1.74869
117.2	1.18261	0.0921681	0.135694	-0.00532145	0.00318087	1.1843	0.0987181	0.13682	0.000784307	0.00748423	0.00631955	0.115528	0.0833559	1	0.0068546		0.119895	0.0849054	1	1.21165	0.00565722	0.0989512	0.0700739	0.825318	1	0.000398998	0.00042376	7.93906e-05	0.999386	5.33766
117.4	1.12371	0.0869196	0.128115	-0.00540815	0.00271083	1.1254	0.0934696	0.129242	0.000697611	0.00701419	0.00623261	0.11484	0.0830544	1	0.00676029		0.119181	0.0845983	1	1.21054	0.00558453	0.0984526	0.0698848	0.826078	1	-0.00049285	-0.000187498	-2.27919e-05	1.00035	8.22651
117.6	1.14599	0.0889672	0.131546	-0.00550281	0.00287061	1.14768	0.0955172	0.132672	0.000602947	0.00717398	0.00625086	0.1156	0.0832264	1	0.00678009		0.119969	0.0847736	1	1.21152	0.00559634	0.0990234	0.0699727	0.825407	1	7.67821e-06	0.000490025	-1.20581e-06	0.999509	-406.388
117.8	1.19969	0.0936992	0.137303	-0.00525516	0.00334012	1.20138	0.100249	0.138429	0.000850603	0.00764348	0.00636226	0.115225	0.0834451	1	0.00690092	0.00689441	0.11958	0.0849963	1	1.21148	0.00569628	0.0987062	0.0701592	0.825438	1	0.000675557	0.000152075	0.000129462	0.99953	1.17467			0.562078
118	1.13607	0.0881081	0.129933	-0.00560467	0.00290906	1.13775	0.0946581	0.131059	0.000501088	0.00721243	0.00633918	0.115191	0.0831974	1	0.00687589		0.119545	0.084744	1	1.21116	0.00567709	0.0987022	0.069969	0.825652	1	-7.15158e-05	0.000122119	0.0001024	0.999795	1.19257
118.2	1.15096	0.0894262	0.131453	-0.00531522	0.00304671	1.15265	0.0959762	0.132579	0.000790535	0.00735008	0.0063767	0.115022	0.083266	1	0.00691659		0.119369	0.0848139	1	1.2111	0.005711	0.0985626	0.0700305	0.825696	1	0.00013937	-3.00519e-05	0.000146423	0.999845	-0.20524
118.4	1.13746	0.0882264	0.129799	-0.005335	0.00303287	1.13915	0.0947765	0.130925	0.000770759	0.00733624	0.00644012	0.114933	0.0831996	1	0.00698538		0.119277	0.0847462	1	1.21101	0.00576823	0.0984938	0.0699799	0.825758	1	-6.04216e-05	-0.000111481	0.000220879	0.999907	-0.504714		-0.504714
118.6	1.14337	0.088852	0.130887	-0.00539836	0.00299468	1.14505	0.095402	0.132014	0.000707403	0.00729805	0.00637354	0.11529	0.0833165	1	0.00691316		0.119648	0.0848654	1	1.21143	0.00570663	0.098766	0.0700541	0.825473	1	0.000285216	0.000209694	0.000142721	0.999568	1.46925
118.8	1.15212	0.089386	0.132026	-0.00545344	0.00293127	1.15381	0.0959361	0.133153	0.000652319	0.00723463	0.00627023	0.115403	0.0831474	1	0.0068011		0.119765	0.0846931	1	1.21126	0.0056149	0.0988761	0.0699216	0.825587	1	-0.000226403	0.000313582	2.14949e-05	0.999728	14.5886
119	1.20149	0.093931	0.137509	-0.00533162	0.00327048	1.20318	0.100481	0.138635	0.000774138	0.00757385	0.00629484	0.115224	0.0835126	1	0.00682779		0.119579	0.0850651	1	1.21147	0.00563595	0.0987053	0.0702163	0.825442	1	0.000880944	0.000152769	5.03385e-05	0.999552	3.03483
119.2	1.13599	0.0879691	0.129546	-0.00550707	0.00282482	1.13768	0.0945191	0.130672	0.000598692	0.00712819	0.00626555	0.114858	0.0830806	1	0.00679602		0.119199	0.084625	1	1.21062	0.00561367	0.0984614	0.0699022	0.826023	1	-0.000414717	-0.00017252	1.59038e-05	1.00027	-10.8477
119.4	1.14755	0.0892662	0.131531	-0.0054167	0.0030156	1.14923	0.0958162	0.132658	0.00068906	0.00731897	0.00636856	0.115431	0.0833739	1	0.00690776		0.119794	0.0849238	1	1.21163	0.00570123	0.0988705	0.0700908	0.825337	1	0.000455003	0.000335681	0.000136882	0.999401	2.45233
119.6	1.17757	0.0917354	0.134902	-0.00534528	0.00325752	1.17925	0.0982855	0.136028	0.000760474	0.00756089	0.00641158	0.115351	0.0833454	1	0.00695442		0.11971	0.0848948	1	1.21156	0.00574006	0.0988068	0.0700706	0.825382	1	0.000370065	0.000262316	0.000187363	0.999447	1.40004		1.40004
119.8	1.18983	0.0927052	0.136072	-0.00548173	0.00335014	1.19152	0.0992552	0.137198	0.000624024	0.0076535	0.00642329	0.115145	0.083301	1	0.00696712	0.00689452	0.119497	0.0848496	1	1.21131	0.00575171	0.0986509	0.0700476	0.82555	1	0.000241083	7.87249e-05	0.000201109	0.999653	0.391453		0.391453	0.428927
120	1.14887	0.0891006	0.130964	-0.00536481	0.00277781	1.15055	0.0956506	0.13209	0.000740951	0.00708118	0.00615458	0.114806	0.0831343	1	0.00667566		0.119145	0.0846798	1	1.2105	0.00551479	0.098426	0.0699544	0.826105	1	-0.000248531	-0.00021604	-0.000114454	1.0004	1.88757
120.2	1.0924	0.0844881	0.124793	-0.00532087	0.00248869	1.09409	0.0910381	0.12592	0.000784893	0.00679206	0.00620796	0.115091	0.0832091	1	0.00673356		0.119441	0.0847559	1	1.21093	0.00556065	0.0986354	0.0699924	0.825812	1	-3.09101e-05	3.68986e-05	-5.16753e-05	1.00002	-0.714048
120.4	1.09996	0.0854399	0.126352	-0.0053895	0.00272294	1.10165	0.09199	0.127479	0.000716257	0.00702631	0.006378	0.115716	0.0835022	1	0.00691799		0.12009	0.0850544	1	1.21206	0.00570762	0.0990788	0.0701733	0.82504	1	0.000834669	0.000589392	0.00014796	0.99903	3.98346
120.6	1.14222	0.0887135	0.131037	-0.00544447	0.00295669	1.14391	0.0952635	0.132164	0.000661289	0.00726005	0.00634671	0.115537	0.0832791	1	0.00688406		0.119904	0.0848272	1	1.21161	0.00568172	0.0989618	0.0700117	0.825345	1	0.00016624	0.000430546	0.000111267	0.999412	3.86949
120.8	1.14528	0.0892867	0.13086	-0.00527293	0.00305608	1.14697	0.0958367	0.131987	0.000832833	0.00735944	0.00641643	0.115074	0.0835565	1	0.00695968		0.119423	0.0851098	1	1.21149	0.00574471	0.0985754	0.070252	0.825428	1	0.00101473	1.54398e-05	0.000193011	0.999509	0.0799946		0.0799946
121	1.15056	0.0890779	0.131536	-0.00536168	0.00305158	1.15225	0.0956279	0.132662	0.000744077	0.00735494	0.0063831	0.115133	0.0829921	1	0.00692353		0.119484	0.0845349	1	1.21094	0.00571747	0.0986706	0.0698092	0.825803	1	-0.000691442	6.90099e-05	0.000153976	0.999969	0.448185
121.2	1.16329	0.0904704	0.133045	-0.00534925	0.003061	1.16498	0.0970204	0.134171	0.000756513	0.00736437	0.00632145	0.11517	0.0832806	1	0.00685666		0.119523	0.0848288	1	1.21121	0.005661	0.0986808	0.0700365	0.825622	1	0.000180864	0.000104198	8.15765e-05	0.999764	1.2773
121.4	1.17365	0.0912826	0.133987	-0.00543817	0.00319721	1.17534	0.0978326	0.135113	0.00066759	0.00750058	0.00638165	0.114957	0.083238	1	0.00692195		0.119302	0.0847854	1	1.21101	0.00571585	0.0985142	0.0700122	0.825758	1	5.63411e-05	-8.82856e-05	0.000152227	0.99992	-0.579959
121.6	1.18598	0.0926079	0.136032	-0.00530741	0.0034215	1.18767	0.0991579	0.137158	0.000798354	0.00772486	0.00650422	0.115485	0.0834895	1	0.0070549		0.11985	0.0850415	1	1.21195	0.00582113	0.0988905	0.0701694	0.825119	1	0.000799622	0.000379334	0.000296011	0.999102	1.28149		1.28149
121.8	1.23599	0.0964591	0.141667	-0.0052221	0.0035492	1.23768	0.103009	0.142794	0.000883663	0.00785257	0.00634459	0.115372	0.0832276	1	0.00688176	0.00688097	0.119732	0.0847747	1	1.21139	0.00568088	0.098839	0.0699814	0.825499	1	1.49486e-05	0.000283554	0.000108762	0.999604	2.6071			0.680741
122	1.16641	0.0906961	0.133381	-0.00527989	0.00298912	1.1681	0.0972461	0.134507	0.000825872	0.00729249	0.00624305	0.11515	0.0832517	1	0.00677162		0.119502	0.0847993	1	1.21107	0.00559142	0.0986748	0.0700199	0.825714	1	9.553e-05	8.8926e-05	-1.04632e-05	0.999895	-8.49894
122.2	1.16128	0.0902921	0.132927	-0.00545653	0.00310631	1.16297	0.0968421	0.134054	0.000649233	0.00740967	0.00637136	0.115269	0.0832716	1	0.00691079		0.119625	0.0848196	1	1.21136	0.00570501	0.0987531	0.0700204	0.825521	1	0.00015012	0.000190372	0.000140165	0.999628	1.35819
122.4	1.11843	0.0868593	0.128229	-0.00542336	0.00275969	1.12011	0.0934093	0.129355	0.000682402	0.00706306	0.00630566	0.115484	0.0833926	1	0.00683953		0.119849	0.0849428	1	1.21163	0.00564489	0.0989152	0.0701062	0.825334	1	0.000511473	0.000384742	6.30778e-05	0.99941	6.09948
122.6	1.18244	0.0919517	0.135532	-0.00532802	0.00329914	1.18413	0.0985017	0.136658	0.000777743	0.00760251	0.00642034	0.115408	0.083185	1	0.00696392		0.11977	0.0847313	1	1.21147	0.00574834	0.0988639	0.0699412	0.825447	1	-0.000116283	0.000313522	0.000197668	0.999521	1.58611		1.58611
122.8	1.19918	0.0936643	0.137403	-0.00523066	0.0031971	1.20087	0.100214	0.138529	0.000875103	0.00750047	0.00624586	0.115358	0.0834513	1	0.00677466		0.119717	0.0850027	1	1.21149	0.00559199	0.0988179	0.0701635	0.825427	1	0.000693431	0.000273698	-7.12524e-06	0.99954	-38.4125
123	1.23422	0.0961302	0.141107	-0.00552505	0.00360886	1.23591	0.10268	0.142234	0.000580714	0.00791223	0.00640194	0.115084	0.0830805	1	0.00694396		0.119434	0.084625	1	1.211	0.00573406	0.0986237	0.0698801	0.825762	1	-0.000423337	2.46126e-05	0.000176076	0.999917	0.139784		0.139784
123.2	1.18729	0.0923868	0.135965	-0.00537266	0.00324208	1.18898	0.0989369	0.137091	0.000733097	0.00754544	0.00634616	0.115301	0.0832116	1	0.00688346		0.119659	0.0847585	1	1.2113	0.0056827	0.0987857	0.0699731	0.825559	1	-3.14302e-05	0.000220488	0.000110597	0.999678	1.99362
123.4	1.17631	0.0916843	0.134671	-0.0051123	0.00325182	1.178	0.0982344	0.135797	0.000993463	0.00755519	0.00641356	0.115277	0.0833906	1	0.00695657		0.119634	0.0849408	1	1.21153	0.00574196	0.0987463	0.0701103	0.825401	1	0.00050845	0.000196892	0.000189677	0.999472	1.03804		1.03804
123.6	1.16775	0.0910063	0.133641	-0.00503066	0.00318185	1.16944	0.0975564	0.134767	0.0010751	0.00748521	0.00640067	0.115241	0.0834213	1	0.00694258		0.119596	0.084972	1	1.21151	0.00573052	0.0987164	0.0701372	0.825416	1	0.00060224	0.000164319	0.000174544	0.999494	0.941419		0.941419
123.8	1.23071	0.0960731	0.141094	-0.00536044	0.00352299	1.2324	0.102623	0.14222	0.000745324	0.00782636	0.0063505	0.115401	0.083271	1	0.00688817	0.00688753	0.119763	0.084819	1	1.21147	0.0056858	0.0988574	0.0700133	0.825444	1	0.000145311	0.000309392	0.000115703	0.999534	2.67403			0.926336
124	1.17916	0.0915582	0.134654	-0.00532013	0.00309975	1.18085	0.0981082	0.13578	0.000785625	0.00740312	0.00626933	0.114985	0.0830829	1	0.00680012		0.119331	0.0846274	1	1.21076	0.00561642	0.0985591	0.0698962	0.825928	1	-0.000410863	-5.91755e-05	2.03655e-05	1.00015	-2.90567
124.2	1.15417	0.0897864	0.131938	-0.00528234	0.00303633	1.15586	0.0963364	0.133064	0.000823415	0.0073397	0.00634998	0.115121	0.083346	1	0.0068876		0.119472	0.0848954	1	1.21126	0.00568634	0.0986351	0.0700887	0.82559	1	0.000379059	5.96115e-05	0.000115057	0.99972	0.518107
124.4	1.13428	0.0881245	0.129732	-0.00557594	0.00277511	1.13597	0.0946745	0.130858	0.000529821	0.00707848	0.00623123	0.115195	0.0833426	1	0.0067588		0.119549	0.0848919	1	1.2112	0.00558026	0.0987029	0.0700891	0.825628	1	0.000369543	0.00012928	-2.43229e-05	0.999792	-5.31516
124.6	1.15535	0.0898277	0.132117	-0.00533803	0.00299898	1.15704	0.0963777	0.133244	0.000767724	0.00730234	0.00631121	0.115159	0.0832966	1	0.00684556		0.119511	0.084845	1	1.2112	0.00565187	0.0986715	0.0700503	0.825626	1	0.00022965	9.42147e-05	6.9561e-05	0.999772	1.35442
124.8	1.17738	0.0917823	0.134944	-0.00513684	0.00306732	1.17907	0.0983323	0.13607	0.000968922	0.00737069	0.00625129	0.115405	0.0833984	1	0.00678056		0.119767	0.0849487	1	1.2115	0.00559685	0.0988584	0.0701189	0.825426	1	0.000532123	0.000315793	-7.42358e-07	0.999537	-425.392
125	1.14651	0.0889279	0.130997	-0.00546175	0.00304094	1.1482	0.0954779	0.132124	0.000644007	0.0073443	0.00639635	0.11507	0.0831542	1	0.0069379		0.119419	0.0847	1	1.21106	0.00572879	0.0986073	0.0699389	0.825725	1	-0.000200145	1.23528e-05	0.000169504	0.999874	0.0728762		0.0728762
125.2	1.22276	0.0955512	0.14055	-0.00550416	0.00351396	1.22445	0.102101	0.141676	0.000601602	0.00781733	0.00638435	0.115706	0.0833852	1	0.00692488		0.120079	0.0849353	1	1.21194	0.00571388	0.0990801	0.0700822	0.825124	1	0.000481712	0.000580039	0.000155421	0.99913	3.73206
125.4	1.23403	0.0961705	0.141264	-0.00521464	0.00343588	1.23571	0.10272	0.14239	0.00089112	0.00773925	0.00626297	0.115229	0.0831264	1	0.00679323		0.119584	0.0846717	1	1.21105	0.00560937	0.0987444	0.069916	0.82573	1	-0.000285508	0.00015872	1.29422e-05	0.999908	12.2638
125.6	1.20661	0.0943155	0.138192	-0.00523638	0.00337782	1.20829	0.100866	0.139318	0.00086938	0.00768118	0.00635704	0.115301	0.0834776	1	0.00689527		0.119659	0.0850294	1	1.21158	0.00569112	0.0987625	0.0701804	0.825366	1	0.000771774	0.000219969	0.000123349	0.999442	1.7833
125.8	1.22039	0.0953894	0.139789	-0.00543642	0.00343984	1.22208	0.101939	0.140915	0.000669343	0.00774321	0.00633609	0.115307	0.0834147	1	0.00687254	0.00684965	0.119665	0.0849653	1	1.2115	0.00567273	0.0987743	0.0701321	0.825421	1	0.000581952	0.000226097	9.87639e-05	0.999513	2.28927			0.0728762
126	1.25031	0.0980451	0.14322	-0.00544593	0.00379011	1.25199	0.104595	0.144347	0.000659826	0.00809347	0.00646446	0.115293	0.0835428	1	0.00701178		0.119651	0.0850958	1	1.21176	0.00578645	0.0987415	0.0702251	0.825247	1	0.000966542	0.000209404	0.000249375	0.999272	0.839717		0.839717
126.2	1.23797	0.0967219	0.141938	-0.00526659	0.00344942	1.23966	0.103272	0.143064	0.000839165	0.00775278	0.00625398	0.115406	0.083307	1	0.00678348		0.119768	0.0848556	1	1.21141	0.00559967	0.0988669	0.0700471	0.825486	1	0.000255878	0.00031706	2.42024e-06	0.999609	131.004
126.4	1.21577	0.094921	0.139355	-0.00530753	0.00339005	1.21746	0.101471	0.140482	0.000798228	0.00769342	0.00631923	0.115389	0.0833463	1	0.00685425		0.11975	0.0848957	1	1.2115	0.00565765	0.0988444	0.0700749	0.825423	1	0.0003738	0.000299349	7.89897e-05	0.999518	3.78973
126.6	1.19703	0.0931078	0.136696	-0.00548804	0.00335196	1.19872	0.0996578	0.137822	0.000617718	0.00765533	0.00638626	0.114975	0.0831369	1	0.00692696		0.11932	0.0846824	1	1.21093	0.00572036	0.0985361	0.0699317	0.825812	1	-0.000249821	-7.23762e-05	0.000157661	0.999984	-0.459064
126.8	1.26911	0.0996778	0.145704	-0.00553556	0.00396011	1.2708	0.106228	0.14683	0.000570203	0.00826347	0.00650258	0.115541	0.0835914	1	0.00705312		0.119908	0.0851453	1	1.21211	0.00581889	0.0989255	0.0702457	0.82501	1	0.00110581	0.00042939	0.000294058	0.998969	1.46022		1.46022
127	1.25973	0.0983362	0.144409	-0.0055739	0.00374432	1.26142	0.104886	0.145535	0.000531858	0.00804769	0.00637987	0.115374	0.0831494	1	0.00692002		0.119734	0.0846951	1	1.21135	0.00571266	0.0988438	0.069918	0.825525	1	-0.000221941	0.000284123	0.00015018	0.999627	1.89188
127.2	1.25701	0.0982992	0.143958	-0.00531288	0.00381879	1.2587	0.104849	0.145085	0.000792879	0.00812216	0.00645282	0.115266	0.0832997	1	0.00699915		0.119622	0.0848482	1	1.21147	0.00577741	0.0987413	0.0700375	0.825444	1	0.000233396	0.00018506	0.000235763	0.999514	0.784943		0.784943
127.4	1.24935	0.0975553	0.143056	-0.00542679	0.00356669	1.25104	0.104105	0.144182	0.000678964	0.00787005	0.0062908	0.11525	0.0832149	1	0.00682341		0.119605	0.0847619	1	1.21119	0.00563364	0.0987502	0.0699823	0.825634	1	-1.89844e-05	0.000175924	4.56131e-05	0.999784	3.85688
127.6	1.2594	0.0984767	0.144567	-0.00542752	0.00367013	1.26109	0.105027	0.145693	0.000678237	0.0079735	0.00632271	0.11553	0.0832826	1	0.00685802		0.119896	0.0848308	1	1.21159	0.00566037	0.0989582	0.0700164	0.825365	1	0.00017758	0.000425	8.30984e-05	0.999442	5.11442
127.8	1.28902	0.101167	0.147821	-0.0053481	0.00393638	1.2907	0.107717	0.148947	0.000757661	0.00823975	0.00638392	0.1154	0.0834561	1	0.00692441	0.00691546	0.119762	0.0850075	1	1.21169	0.00571466	0.0988381	0.070156	0.825291	1	0.000703808	0.000307182	0.000154891	0.999342	1.98322			1.02829
128	1.23717	0.0967007	0.141535	-0.00548006	0.003577	1.23886	0.103251	0.142661	0.000625695	0.00788036	0.00636098	0.115155	0.0833433	1	0.00689953		0.119508	0.0848926	1	1.2113	0.00569597	0.0986606	0.0700839	0.82556	1	0.00036967	8.96216e-05	0.000127967	0.99968	0.700351
128.2	1.23768	0.0963771	0.141557	-0.00530427	0.0033325	1.23937	0.102927	0.142684	0.000801493	0.00763587	0.0061611	0.115126	0.0830481	1	0.00668274		0.119477	0.084592	1	1.21075	0.00551949	0.0986803	0.0698673	0.825933	1	-0.000517357	6.99837e-05	-0.000106704	1.00018	-0.655866
128.4	1.22529	0.0955385	0.140193	-0.00539463	0.00354348	1.22698	0.102088	0.14132	0.000711126	0.00784685	0.00639525	0.115177	0.083203	1	0.0069367		0.11953	0.0847497	1	1.21122	0.00572706	0.0986856	0.0699707	0.825617	1	-5.55198e-05	0.000107473	0.00016821	0.99974	0.638922
128.6	1.19524	0.0930853	0.136697	-0.00543808	0.00328111	1.19692	0.0996353	0.137823	0.000667681	0.00758448	0.00633664	0.115148	0.0832429	1	0.00687314		0.1195	0.0847903	1	1.21116	0.00567482	0.0986652	0.0700073	0.825653	1	6.70087e-05	8.36004e-05	9.94117e-05	0.999798	0.840952
128.8	1.27111	0.0996853	0.14586	-0.00538504	0.00378065	1.2728	0.106235	0.146987	0.00072072	0.00808402	0.00635135	0.115483	0.0834656	1	0.00688909		0.119847	0.0850172	1	1.21175	0.00568523	0.098904	0.0701605	0.82525	1	0.000731073	0.000381952	0.000116689	0.999298	3.27324
129	1.26856	0.0990458	0.145139	-0.00539941	0.00369695	1.27025	0.105596	0.146265	0.000706351	0.00800031	0.00629822	0.115146	0.08313	1	0.00683146		0.119498	0.0846754	1	1.21101	0.00564115	0.098677	0.0699215	0.82576	1	-0.000273207	8.36954e-05	5.43126e-05	0.999938	1.54099
129.2	1.25138	0.0978199	0.143525	-0.00518917	0.00372936	1.25307	0.10437	0.144651	0.000916592	0.00803273	0.00641042	0.115437	0.0832912	1	0.00695316		0.1198	0.0848395	1	1.21159	0.00573886	0.0988781	0.0700231	0.82536	1	0.000204013	0.000339422	0.000186014	0.999418	1.82471		1.82471
129.4	1.28073	0.10024	0.146777	-0.00552962	0.00373065	1.28242	0.10679	0.147903	0.000576138	0.00803401	0.00626473	0.115331	0.0832723	1	0.00679513		0.11969	0.0848203	1	1.21131	0.00560976	0.0988108	0.0700239	0.825556	1	0.000152824	0.000249676	1.50188e-05	0.999693	16.6242
129.6	1.27278	0.0995508	0.145737	-0.00539275	0.00377391	1.27447	0.106101	0.146863	0.000713013	0.00807727	0.00633774	0.115234	0.0832508	1	0.00687433		0.11959	0.0847984	1	1.21126	0.00567534	0.0987314	0.0700083	0.825585	1	8.88964e-05	0.000160899	0.000100712	0.999714	1.59761
129.8	1.26111	0.0983538	0.144303	-0.00539278	0.00369213	1.2628	0.104904	0.14543	0.000712978	0.0079955	0.00633154	0.115164	0.0830722	1	0.00686761	0.00686029	0.119517	0.0846164	1	1.211	0.00567102	0.0986925	0.0698732	0.825763	1	-0.000449176	9.83852e-05	9.34423e-05	0.999933	1.0529			1.82471
130	1.26616	0.0992492	0.145133	-0.00551727	0.00385352	1.26785	0.105799	0.14626	0.000588492	0.00815688	0.00643365	0.115361	0.083448	1	0.00697836		0.119721	0.0849992	1	1.2117	0.00575916	0.098804	0.0701488	0.825288	1	0.000679107	0.000270413	0.000213242	0.999327	1.2681		1.2681
130.2	1.29167	0.101172	0.147847	-0.00530901	0.00389464	1.29336	0.107722	0.148973	0.000796746	0.00819801	0.00633852	0.115183	0.0832885	1	0.00687517		0.119536	0.0848368	1	1.21125	0.0056761	0.0986883	0.0700408	0.825595	1	0.000204009	0.000114765	0.000101613	0.999727	1.12944
130.4	1.28879	0.100618	0.147278	-0.00522969	0.00390571	1.29048	0.107168	0.148404	0.00087607	0.00820907	0.00636124	0.114999	0.0830449	1	0.00689982		0.119345	0.0845887	1	1.21083	0.0056984	0.0985646	0.0698599	0.825877	1	-0.000528028	-4.99601e-05	0.000128297	1.00007	-0.389409
130.6	1.22953	0.0959758	0.140387	-0.00538681	0.00329142	1.23122	0.102526	0.141513	0.000718949	0.00759479	0.0061685	0.114937	0.0832716	1	0.00669076		0.119281	0.0848196	1	1.21079	0.00552594	0.0985149	0.070053	0.825906	1	0.000162851	-9.92493e-05	-9.80522e-05	1.00015	1.01221
130.8	1.20816	0.0942193	0.138506	-0.00527689	0.00317293	1.20985	0.100769	0.139632	0.000828871	0.00747629	0.00617954	0.115413	0.0832911	1	0.00670274		0.119775	0.0848394	1	1.21132	0.00553343	0.09888	0.070039	0.825548	1	0.00020919	0.00032541	-8.49537e-05	0.999701	-3.83044
131	1.22164	0.0953982	0.139817	-0.00543621	0.00330425	1.22332	0.101948	0.140943	0.00066955	0.00760762	0.00621881	0.115213	0.083337	1	0.00674532		0.119568	0.0848862	1	1.2112	0.00556913	0.0987186	0.0700844	0.825628	1	0.000352337	0.000146019	-3.89084e-05	0.999795	-3.7529
131.2	1.20884	0.0943855	0.138319	-0.00542723	0.00360046	1.21053	0.100936	0.139445	0.000678531	0.00790382	0.00652923	0.115193	0.0833813	1	0.00708203		0.119547	0.0849314	1	1.21156	0.00584538	0.098672	0.0701008	0.825382	1	0.000480108	0.000118195	0.0003254	0.999423	0.36323		0.36323
131.4	1.23242	0.095974	0.141252	-0.00544288	0.00333229	1.23411	0.102524	0.142379	0.000662875	0.00763566	0.0061872	0.11537	0.0830756	1	0.00671104		0.11973	0.0846199	1	1.21106	0.00554145	0.0988639	0.0698725	0.825722	1	-0.000441013	0.000286732	-7.59932e-05	0.999912	-3.77312
131.6	1.20979	0.094314	0.138391	-0.00547959	0.00346149	1.21148	0.100864	0.139517	0.000626169	0.00776485	0.00640939	0.115163	0.0832568	1	0.00695204		0.119515	0.0848045	1	1.21127	0.00573946	0.0986693	0.0700128	0.825579	1	0.000107181	9.46764e-05	0.000184802	0.999691	0.512313		0.512313
131.8	1.3064	0.102473	0.149912	-0.00548906	0.00402704	1.30809	0.109023	0.151038	0.000616702	0.00833041	0.00636839	0.115465	0.0833453	1	0.00690757	0.00685448	0.119829	0.0848947	1	1.21163	0.00570105	0.0988988	0.0700665	0.825334	1	0.000367862	0.000365614	0.000136687	0.999395	2.67482			0.714549
132	1.27872	0.100287	0.146317	-0.00504114	0.00379087	1.28041	0.106837	0.147444	0.00106462	0.00809424	0.00632162	0.115154	0.0834399	1	0.00685684		0.119506	0.084991	1	1.21135	0.00566048	0.0986549	0.070162	0.825523	1	0.000662527	8.94579e-05	8.17672e-05	0.999644	1.09406
132.2	1.24683	0.0971775	0.142363	-0.00543719	0.00366079	1.24852	0.103727	0.14349	0.00066857	0.00796416	0.00637886	0.114927	0.0830801	1	0.00691893		0.119271	0.0846245	1	1.21081	0.00571428	0.0985048	0.0698906	0.82589	1	-0.000420198	-0.000114434	0.000148974	1.00008	-0.768143
132.4	1.21923	0.0954042	0.139605	-0.00520687	0.0034997	1.22092	0.101954	0.140731	0.000898885	0.00780307	0.00639116	0.115267	0.0835064	1	0.00693227		0.119623	0.0850587	1	1.21161	0.00572152	0.0987304	0.0702028	0.825345	1	0.000858936	0.000187942	0.000163376	0.99941	1.15037
132.6	1.2442	0.09691	0.142252	-0.00556621	0.00354004	1.24588	0.10346	0.143378	0.00053955	0.00784341	0.00629545	0.115081	0.0830414	1	0.00682846		0.119431	0.0845851	1	1.21084	0.00563942	0.0986342	0.0698563	0.82587	1	-0.00053922	2.5484e-05	5.10587e-05	1.00007	0.499112
132.8	1.24575	0.097448	0.143001	-0.00523284	0.00355906	1.24743	0.103998	0.144127	0.000872917	0.00786243	0.00630288	0.115539	0.0833695	1	0.00683652		0.119906	0.0849193	1	1.21166	0.00564226	0.0989598	0.070085	0.825313	1	0.000440363	0.000433865	5.98257e-05	0.999384	7.25214
133	1.23566	0.0964378	0.141535	-0.00550133	0.00356572	1.23735	0.102988	0.142661	0.000604433	0.00786909	0.00635963	0.115296	0.0832326	1	0.00689807		0.119653	0.0847799	1	1.21133	0.00569462	0.0987782	0.069989	0.825538	1	3.17819e-05	0.000214752	0.000126412	0.99965	1.69883
133.2	1.28669	0.10088	0.147364	-0.00539219	0.00376479	1.28838	0.107431	0.14849	0.000713569	0.00806815	0.00626226	0.115254	0.0833843	1	0.00679245		0.119609	0.0849344	1	1.21134	0.00560741	0.0987417	0.0701163	0.825535	1	0.00049337	0.000180377	1.21057e-05	0.99967	14.9002
133.4	1.28682	0.100703	0.147338	-0.00536021	0.00388186	1.28851	0.107253	0.148464	0.00074555	0.00818523	0.00635249	0.115222	0.083238	1	0.00689033		0.119576	0.0847854	1	1.21125	0.0056886	0.0987214	0.0699981	0.825592	1	5.0132e-05	0.000149127	0.000118027	0.999719	1.2635
133.6	1.24849	0.0976471	0.143134	-0.00531805	0.00368163	1.25018	0.104197	0.144261	0.000787707	0.007985	0.0063871	0.115392	0.0833459	1	0.00692786		0.119753	0.0848953	1	1.21158	0.00571806	0.0988409	0.0700701	0.825371	1	0.000371107	0.000300068	0.000158635	0.999438	1.89156
133.8	1.28163	0.100281	0.146809	-0.0053834	0.00375073	1.28332	0.106831	0.147935	0.000722355	0.00805409	0.00627599	0.115276	0.0832457	1	0.00680735	0.00686891	0.119632	0.0847932	1	1.21123	0.00562019	0.0987691	0.0700057	0.825605	1	7.34959e-05	0.000199628	2.82358e-05	0.999752	7.07003			#DIV/0!
134	1.23092	0.0960575	0.140588	-0.00537789	0.00367129	1.2326	0.102608	0.141714	0.000727871	0.00797466	0.00646976	0.114971	0.0832445	1	0.00701753		0.119316	0.084792	1	1.21113	0.00579422	0.0985169	0.0700109	0.825678	1	7.36176e-05	-7.83171e-05	0.000255664	0.999802	-0.306329		-0.306329
134.2	1.21052	0.0941474	0.138443	-0.00532362	0.00338015	1.21221	0.100697	0.139569	0.000782138	0.00768352	0.00633844	0.115136	0.0830693	1	0.00687509		0.119488	0.0846135	1	1.21098	0.00567731	0.0986705	0.0698722	0.82578	1	-0.000457261	7.31342e-05	0.000101538	0.999953	0.720262
134.4	1.24198	0.097054	0.142373	-0.00537385	0.00373632	1.24367	0.103604	0.1435	0.000731913	0.00803969	0.00646451	0.115384	0.0833053	1	0.00701183		0.119745	0.0848539	1	1.21161	0.00578719	0.0988314	0.070034	0.825347	1	0.000246919	0.000290559	0.000249471	0.999391	1.1647		1.1647
134.6	1.24046	0.096944	0.142084	-0.00530676	0.0034467	1.24215	0.103494	0.14321	0.000798995	0.00775007	0.00623926	0.115292	0.0833187	1	0.00676751		0.11965	0.0848676	1	1.21128	0.00558705	0.0987792	0.0700641	0.82557	1	0.000294691	0.000215759	-1.4882e-05	0.999717	-14.498
134.8	1.25322	0.0980795	0.143328	-0.00537138	0.00393615	1.25491	0.10463	0.144454	0.000734375	0.00823952	0.00656581	0.115111	0.0833759	1	0.00712171		0.119461	0.0849259	1	1.21151	0.00587838	0.0986055	0.0700992	0.825417	1	0.000465155	4.33308e-05	0.000368334	0.999459	0.11764		0.11764
135	1.23251	0.0962648	0.141157	-0.00549334	0.00346045	1.2342	0.102815	0.142284	0.000612415	0.00776381	0.00629058	0.115285	0.0833051	1	0.00682318		0.119642	0.0848537	1	1.21132	0.00563285	0.0987698	0.0700507	0.825547	1	0.000252536	0.000207225	4.53627e-05	0.999677	4.56817
135.2	1.23856	0.0967672	0.141645	-0.00542494	0.00353351	1.24025	0.103317	0.142772	0.000680821	0.00783687	0.00631881	0.115116	0.0833038	1	0.00685379		0.119466	0.0848524	1	1.21117	0.00565881	0.0986369	0.0700581	0.825646	1	0.00025246	5.5426e-05	7.84672e-05	0.999796	0.706359
135.4	1.23987	0.0968585	0.142033	-0.00535432	0.00350324	1.24156	0.103408	0.143159	0.000751444	0.0078066	0.00628773	0.115306	0.0832891	1	0.00682009		0.119663	0.0848374	1	1.21132	0.00563029	0.0987876	0.0700371	0.825545	1	0.000203774	0.000226029	4.20206e-05	0.999675	5.379
135.6	1.26163	0.0986106	0.144532	-0.00519392	0.00372559	1.26332	0.105161	0.145658	0.00091184	0.00802896	0.00635546	0.115298	0.0832417	1	0.00689355		0.119656	0.0847892	1	1.21134	0.00569085	0.09878	0.0699962	0.825533	1	5.93924e-05	0.000217513	0.000121512	0.999644	1.79006
135.8	1.2158	0.0947613	0.139251	-0.0056274	0.00327628	1.21749	0.101311	0.140377	0.000478363	0.00757965	0.00622562	0.1153	0.0832131	1	0.00675272	0.0068937	0.119658	0.08476	1	1.21117	0.00557536	0.0987952	0.0699819	0.825648	1	-2.45189e-05	0.000223182	-3.08936e-05	0.999815	-7.22423			0.325337
136	1.23832	0.096792	0.142106	-0.005431	0.00362718	1.24	0.103342	0.143232	0.000674759	0.00793054	0.00639558	0.115509	0.08334	1	0.00693706		0.119875	0.0848893	1	1.2117	0.00572506	0.098931	0.0700579	0.825286	1	0.000350049	0.000404162	0.000168591	0.99933	2.39729
136.2	1.22918	0.0959107	0.140509	-0.00540829	0.00355744	1.23087	0.102461	0.141636	0.000697471	0.00786081	0.00638639	0.11507	0.0832426	1	0.0069271		0.119419	0.08479	1	1.21114	0.00571951	0.0986005	0.0700087	0.825671	1	6.71718e-05	1.22456e-05	0.000157804	0.999811	0.0775998
136.4	1.22428	0.0957713	0.140288	-0.00539076	0.00325643	1.22597	0.102321	0.141414	0.000715002	0.0075598	0.0061664	0.115349	0.0834618	1	0.00668849		0.119709	0.0850134	1	1.21141	0.00552124	0.0988175	0.0701772	0.825484	1	0.000727077	0.00026861	-0.000100382	0.999629	-2.67588
136.6	1.23005	0.0960227	0.140797	-0.00534018	0.00364692	1.23174	0.102573	0.141924	0.000765574	0.00795029	0.00645453	0.115222	0.0832747	1	0.007001		0.119577	0.0848228	1	1.2114	0.00577926	0.0987097	0.0700204	0.825491	1	0.000158954	0.000146292	0.00023777	0.999572	0.615269		0.615269
136.8	1.2607	0.098471	0.144204	-0.00560162	0.00368666	1.26239	0.105021	0.14533	0.000504141	0.00799003	0.00632931	0.115123	0.0831925	1	0.00686518		0.119474	0.084739	1	1.21108	0.00566865	0.098651	0.0699699	0.82571	1	-8.44244e-05	6.18428e-05	9.08046e-05	0.999871	0.681054
137	1.26763	0.0992804	0.144951	-0.00530279	0.00385781	1.26932	0.10583	0.146077	0.000802966	0.00816118	0.00642956	0.115083	0.0833756	1	0.00697392		0.119433	0.0849255	1	1.21133	0.00575723	0.0985961	0.0701092	0.825537	1	0.000467778	2.29102e-05	0.00020845	0.999638	0.109907		0.109907
137.2	1.25927	0.0985372	0.144437	-0.00536499	0.00370127	1.26096	0.105087	0.145563	0.000740766	0.00800463	0.00634804	0.115438	0.083339	1	0.0068855		0.119801	0.0848882	1	1.21157	0.0056831	0.0988806	0.0700643	0.825372	1	0.000349736	0.000342513	0.000112815	0.999447	3.03606
137.4	1.17894	0.09139	0.134508	-0.00555418	0.00315717	1.18063	0.09794	0.135635	0.000551579	0.00746053	0.00631911	0.114883	0.0829557	1	0.00685412		0.119225	0.0844979	1	1.21058	0.00566186	0.0984863	0.0697996	0.826052	1	-0.000793907	-0.000151972	7.88219e-05	1.00029	-1.92804
137.6	1.14186	0.0885272	0.130834	-0.00537448	0.00292362	1.14354	0.0950772	0.13196	0.000731281	0.00722699	0.00631982	0.115396	0.0831426	1	0.00685489		0.119757	0.0846882	1	1.2113	0.00565912	0.0988665	0.0699151	0.825559	1	-0.000241802	0.000305416	7.97009e-05	0.999682	3.83203
137.8	1.12258	0.087206	0.128471	-0.00533438	0.00290783	1.12427	0.093756	0.129597	0.000771378	0.00721119	0.00641409	0.115272	0.0833925	1	0.00695714	0.00689444	0.119629	0.0849427	1	1.21153	0.00574245	0.098742	0.070112	0.825404	1	0.000514258	0.000192068	0.000190299	0.999475	1.0093		1.0093	0.578158
138	1.15474	0.0900386	0.132522	-0.00551173	0.00295517	1.15643	0.0965887	0.133648	0.00059403	0.00725854	0.00627666	0.115569	0.083523	1	0.00680808		0.119937	0.0850756	1	1.21182	0.00561806	0.0989727	0.0702048	0.825205	1	0.000903495	0.000461564	2.90644e-05	0.999258	15.8807
138.2	1.19334	0.0930442	0.136975	-0.00537302	0.00332722	1.19503	0.0995943	0.138101	0.000732744	0.00763059	0.00638529	0.115564	0.0833406	1	0.0069259		0.119931	0.0848899	1	1.21175	0.00571563	0.0989738	0.0700558	0.825255	1	0.000350707	0.000452988	0.000156524	0.999293	2.89405
138.4	1.23202	0.0960776	0.141478	-0.00535625	0.00334731	1.23371	0.102628	0.142605	0.000749507	0.00765068	0.00620138	0.11559	0.0831864	1	0.00672642		0.119959	0.0847328	1	1.21142	0.00555252	0.0990236	0.0699451	0.825479	1	-0.000112071	0.00048293	-5.92871e-05	0.999608	-8.14562
138.6	1.2596	0.0987058	0.14453	-0.00533377	0.00371939	1.26129	0.105256	0.145656	0.000771993	0.00802276	0.00636075	0.115482	0.0834509	1	0.00689929		0.119847	0.0850022	1	1.21175	0.00569367	0.0989039	0.0701484	0.825254	1	0.000686224	0.000381114	0.000127719	0.9993	2.984
138.8	1.20663	0.0937682	0.137781	-0.00541079	0.00340464	1.20832	0.100318	0.138907	0.000694972	0.007708	0.00637913	0.114959	0.0830232	1	0.00691922		0.119304	0.0845666	1	1.21079	0.00571464	0.098534	0.0698442	0.825907	1	-0.000592997	-8.62091e-05	0.000149303	1.0001	-0.577409
139	1.25251	0.0981546	0.143393	-0.00533177	0.00367184	1.2542	0.104705	0.14452	0.000773989	0.0079752	0.00635882	0.115229	0.0834835	1	0.00689719		0.119584	0.0850354	1	1.21152	0.00569302	0.098706	0.0701892	0.825412	1	0.000791432	0.000155349	0.000125427	0.999499	1.23856
139.2	1.1769	0.0914786	0.134596	-0.00535796	0.00323196	1.17859	0.0980287	0.135722	0.000747804	0.00753532	0.00639351	0.115157	0.0831746	1	0.00693482		0.119509	0.0847207	1	1.21116	0.00572575	0.0986727	0.0699498	0.825652	1	-0.000140801	8.9677e-05	0.000166174	0.999783	0.539658
139.4	1.1991	0.093604	0.137447	-0.00531201	0.00318129	1.20079	0.100154	0.138573	0.000793747	0.00748466	0.0062331	0.115401	0.0834066	1	0.00676082		0.119763	0.0849571	1	1.21148	0.00558063	0.0988567	0.0701267	0.825436	1	0.000557482	0.000313277	-2.20925e-05	0.999554	-14.1802
139.6	1.21637	0.0949648	0.139365	-0.00520494	0.00329281	1.21806	0.101515	0.140491	0.000900814	0.00759618	0.00623629	0.11534	0.0833414	1	0.00676429		0.119699	0.0848907	1	1.21135	0.00558407	0.0988144	0.0700792	0.825522	1	0.000361999	0.00025844	-1.83558e-05	0.999659	-14.0795
139.8	1.2301	0.0960765	0.141153	-0.00542504	0.00343544	1.23179	0.102627	0.142279	0.000680717	0.00773881	0.00628258	0.115506	0.0833151	1	0.0068145	0.00684505	0.119872	0.0848639	1	1.21155	0.00562461	0.0989409	0.0700457	0.825389	1	0.000277303	0.000405311	3.60074e-05	0.999482	11.2563			#DIV/0!
140	1.22155	0.0953838	0.139931	-0.00531588	0.00354459	1.22324	0.101934	0.141057	0.00078988	0.00784796	0.0064157	0.115314	0.0833309	1	0.00695889		0.119673	0.08488	1	1.21151	0.00574398	0.0987795	0.0700612	0.825415	1	0.000327144	0.000229703	0.000192205	0.999487	1.1951		1.1951
140.2	1.16963	0.0910619	0.133425	-0.00548441	0.00313744	1.17132	0.0976119	0.134552	0.000621354	0.00744081	0.00635248	0.114872	0.0833348	1	0.00689032		0.119213	0.0848839	1	1.21099	0.00568983	0.0984429	0.0700948	0.825772	1	0.000351585	-0.000163491	0.000117973	0.999948	-1.38583
140.4	1.25646	0.0982911	0.144412	-0.00518761	0.00348918	1.25815	0.104841	0.145539	0.000918151	0.00779255	0.00619368	0.115677	0.0833298	1	0.00671807		0.120049	0.0848789	1	1.21165	0.00554458	0.0990794	0.0700525	0.825323	1	0.000319267	0.000560601	-6.82942e-05	0.999419	-8.20862
140.6	1.23751	0.096911	0.141962	-0.00536485	0.00364942	1.2392	0.103461	0.143088	0.000740907	0.00795279	0.00641768	0.115468	0.0834902	1	0.00696104		0.119832	0.0850423	1	1.21184	0.00574421	0.0988847	0.0701764	0.825195	1	0.000804285	0.00036668	0.000194502	0.999215	1.88522		1.88522
140.8	1.23639	0.0963525	0.141328	-0.00531351	0.00339261	1.23807	0.102902	0.142454	0.000792252	0.00769598	0.00621609	0.115061	0.083115	1	0.00674238		0.11941	0.0846601	1	1.21081	0.00556847	0.0986196	0.0699201	0.825892	1	-0.000314741	1.01309e-05	-4.21416e-05	1.00012	-0.240402
141	1.23333	0.0963596	0.141562	-0.00529656	0.00350229	1.23501	0.10291	0.142688	0.000809195	0.00780566	0.00632029	0.115536	0.0833266	1	0.0068554		0.119902	0.0848756	1	1.21163	0.00565799	0.0989591	0.0700506	0.825332	1	0.000310561	0.000430137	8.0262e-05	0.999403	5.35916
141.2	1.23048	0.0961786	0.140981	-0.00543867	0.00352342	1.23217	0.102729	0.142108	0.000667089	0.00782679	0.00635205	0.115331	0.0833723	1	0.00688985		0.11969	0.0849222	1	1.2115	0.00568703	0.098795	0.0700966	0.825421	1	0.000453086	0.000247023	0.000117499	0.999509	2.10234
141.4	1.19388	0.093077	0.13656	-0.00532611	0.00313206	1.19557	0.099627	0.137686	0.000779649	0.00743543	0.00621915	0.115163	0.0833301	1	0.00674569		0.119516	0.0848792	1	1.21114	0.0055697	0.0986805	0.070082	0.825668	1	0.000332753	0.000101388	-3.85214e-05	0.999845	-2.63199
141.6	1.23587	0.0966506	0.141678	-0.00541718	0.0035685	1.23755	0.103201	0.142804	0.000688581	0.00787186	0.00636082	0.115392	0.0833907	1	0.00689936		0.119753	0.0849409	1	1.21159	0.00569445	0.0988396	0.0701068	0.825359	1	0.000507007	0.000301032	0.000127796	0.99943	2.35557
141.8	1.20262	0.0940653	0.137482	-0.00514818	0.00330774	1.20431	0.100615	0.138608	0.00095758	0.0076111	0.00631988	0.115093	0.0835459	1	0.00685495	0.0068516	0.119443	0.085099	1	1.2114	0.00565872	0.0985993	0.0702487	0.825493	1	0.000984371	3.51952e-05	7.97047e-05	0.999611	0.44157			1.54016
142	1.24364	0.0970465	0.14247	-0.0052095	0.00346815	1.24532	0.103596	0.143596	0.000896261	0.00777152	0.00624056	0.115308	0.0831884	1	0.00676892		0.119666	0.0847348	1	1.21117	0.00558875	0.0988022	0.0699611	0.825648	1	-9.96398e-05	0.000229932	-1.33507e-05	0.999811	-17.2224
142.2	1.26605	0.0993934	0.145051	-0.00530856	0.00384	1.26773	0.105943	0.146177	0.000797198	0.00814337	0.00642356	0.115306	0.0835691	1	0.00696741		0.119663	0.0851226	1	1.21175	0.00574986	0.0987523	0.0702475	0.82525	1	0.00104657	0.000221608	0.000201383	0.999286	1.10043		1.10043
142.4	1.24443	0.097347	0.142324	-0.00530474	0.00344598	1.24612	0.103897	0.143451	0.000801015	0.00774934	0.0062188	0.115118	0.0833767	1	0.00674532		0.119469	0.0849266	1	1.21114	0.00556939	0.0986417	0.0701212	0.825668	1	0.00047469	6.09642e-05	-3.89357e-05	0.999846	-1.56577
142.6	1.18384	0.0922226	0.13522	-0.00544459	0.00320813	1.18553	0.0987726	0.136347	0.000661168	0.0075115	0.006336	0.115009	0.0833154	1	0.00687244		0.119356	0.0848642	1	1.21109	0.00567458	0.0985524	0.0700724	0.825701	1	0.000289669	-3.99246e-05	9.86393e-05	0.999861	-0.404754
142.8	1.16704	0.0909219	0.133549	-0.00537405	0.00319502	1.16873	0.0974719	0.134676	0.000731714	0.00749839	0.00641584	0.115232	0.0833999	1	0.00695904		0.119588	0.0849502	1	1.2115	0.00574417	0.0987106	0.0701201	0.825425	1	0.00053756	0.000156632	0.000192355	0.999501	0.814287		0.814287
143	1.20204	0.0937643	0.137932	-0.00528794	0.00320351	1.20373	0.100314	0.139058	0.000817818	0.00750688	0.00623633	0.115522	0.0833361	1	0.00676433		0.119888	0.0848853	1	1.21154	0.00558326	0.0989554	0.0700641	0.825397	1	0.000341182	0.000420901	-1.82705e-05	0.999502	-23.0372
143.2	1.23256	0.0960908	0.140891	-0.00548241	0.00356688	1.23425	0.102641	0.142017	0.000623347	0.00787024	0.00637654	0.115063	0.0831605	1	0.00691641		0.119412	0.0847065	1	1.21104	0.00571116	0.0986034	0.0699455	0.82574	1	-0.000180465	7.02693e-06	0.00014625	0.999897	0.0480473
143.4	1.22044	0.0953405	0.14001	-0.0053198	0.00338972	1.22213	0.10189	0.141136	0.000785955	0.00769308	0.00629482	0.115484	0.0833713	1	0.00682777		0.119848	0.0849211	1	1.2116	0.00563535	0.0989175	0.0700902	0.825357	1	0.000447198	0.000384576	5.03556e-05	0.999441	7.63721
143.6	1.16299	0.0903334	0.13262	-0.00552457	0.0029991	1.16468	0.0968834	0.133746	0.000581189	0.00730246	0.00626992	0.114835	0.0831845	1	0.00680077		0.119175	0.0847308	1	1.21071	0.00561719	0.098434	0.0699846	0.825964	1	-0.000100058	-0.000193893	2.10354e-05	1.0002	-9.21749
143.8	1.214	0.0946681	0.139168	-0.00541761	0.00343143	1.21569	0.101218	0.140294	0.000688152	0.0077348	0.00636249	0.115403	0.08326	1	0.00690117	0.00685236	0.119765	0.0848077	1	1.21147	0.00569651	0.0988588	0.0700038	0.825441	1	0.000111694	0.000310834	0.000129769	0.999528	2.3953			0.957359
144	1.19844	0.0932598	0.137199	-0.00538096	0.00322574	1.20012	0.0998098	0.138325	0.000724794	0.00752911	0.00627361	0.115259	0.0831662	1	0.00680476		0.119615	0.0847123	1	1.21113	0.00561851	0.0987633	0.0699447	0.825674	1	-0.000166041	0.000185157	2.54312e-05	0.999836	7.28069
144.2	1.16345	0.0906586	0.132944	-0.00519447	0.00295433	1.16514	0.0972086	0.13407	0.000911285	0.00725769	0.00622903	0.115068	0.0834308	1	0.00675642		0.119417	0.0849818	1	1.21116	0.00557849	0.0985975	0.0701659	0.825658	1	0.000639358	1.57456e-05	-2.69329e-05	0.999833	-0.584625
144.4	1.15034	0.0890793	0.131478	-0.00548127	0.00295709	1.15202	0.0956293	0.132605	0.000624485	0.00726045	0.00630234	0.115106	0.0830098	1	0.00683593		0.119456	0.0845529	1	1.21084	0.00564559	0.0986551	0.0698297	0.82587	1	-0.000635653	4.71392e-05	5.91528e-05	1.00007	0.796905
144.6	1.1753	0.0914119	0.134602	-0.00533552	0.00322217	1.17698	0.0979619	0.135728	0.00077024	0.00752554	0.00639392	0.115318	0.0832312	1	0.00693526		0.119677	0.0847785	1	1.21139	0.00572504	0.098793	0.0699844	0.825498	1	2.63855e-05	0.000234134	0.00016665	0.999592	1.40495
144.8	1.22534	0.0954093	0.140442	-0.00533752	0.00346698	1.22702	0.101959	0.141568	0.000768239	0.00777035	0.00633268	0.115375	0.0830948	1	0.00686883		0.119736	0.0846395	1	1.21124	0.00567089	0.0988536	0.0698781	0.825597	1	-0.000386168	0.000286798	9.47926e-05	0.999726	3.02553
145	1.22515	0.0956906	0.140383	-0.00539202	0.00349941	1.22684	0.102241	0.141509	0.000713737	0.00780277	0.00636007	0.115345	0.0833368	1	0.00689855		0.119704	0.084886	1	1.21149	0.00569428	0.0988073	0.0700675	0.825431	1	0.000345244	0.000258433	0.000126923	0.999519	2.03614
145.2	1.19555	0.0931672	0.136853	-0.00532315	0.00331257	1.19723	0.0997172	0.137979	0.000782607	0.00761594	0.00636128	0.115248	0.0832897	1	0.00689986		0.119604	0.084838	1	1.21134	0.00569605	0.0987369	0.0700364	0.825531	1	0.000205514	0.000172645	0.000128336	0.999642	1.34526
145.4	1.18014	0.0920524	0.134943	-0.00542046	0.00315576	1.18183	0.0986024	0.136069	0.000685297	0.00745912	0.00631152	0.115135	0.0834322	1	0.00684589		0.119486	0.0849831	1	1.21132	0.00565162	0.0986415	0.0701578	0.825549	1	0.000639912	7.25986e-05	6.99103e-05	0.999679	1.03845
145.6	1.22898	0.0961544	0.141138	-0.00527237	0.00352117	1.23067	0.102704	0.142265	0.000833388	0.00782453	0.00635796	0.1156	0.0834543	1	0.00689626		0.119969	0.0850057	1	1.21187	0.00569059	0.0989946	0.0701442	0.825171	1	0.00069358	0.000486015	0.000124454	0.999196	3.90517
145.8	1.2578	0.0987715	0.144208	-0.00529959	0.00384207	1.25949	0.105322	0.145334	0.000806173	0.00814544	0.00646725	0.115391	0.0836223	1	0.0070148	0.00687566	0.119753	0.0851768	1	1.21194	0.00578806	0.0988103	0.0702812	0.82512	1	0.00120406	0.000296808	0.000252623	0.999115	1.1749		1.1749	1.1749
146	1.24759	0.0972236	0.142641	-0.00532984	0.00360018	1.24927	0.103774	0.143767	0.000775918	0.00790355	0.00632651	0.11508	0.0830671	1	0.00686214		0.11943	0.0846112	1	1.2109	0.00566696	0.0986287	0.0698745	0.82583	1	-0.000462379	2.37583e-05	8.75214e-05	1.00002	0.271457
146.2	1.1383	0.0883608	0.129963	-0.00550114	0.00301112	1.13998	0.0949108	0.131089	0.000604614	0.00731449	0.00641631	0.114992	0.0832563	1	0.00695955		0.119338	0.0848039	1	1.2111	0.00574646	0.0985368	0.0700222	0.825695	1	0.000109797	-5.8028e-05	0.000192915	0.999835	-0.300796		-0.300796
146.4	1.15155	0.0893566	0.131551	-0.0053812	0.00305135	1.15324	0.0959066	0.132677	0.000724564	0.00735471	0.00637745	0.115047	0.0831629	1	0.0069174		0.119396	0.0847089	1	1.21102	0.00571203	0.0985907	0.0699483	0.825749	1	-0.000172868	-7.31053e-06	0.000147315	0.999908	-0.0496252
146.6	1.1462	0.0889265	0.131206	-0.00537461	0.00268594	1.14789	0.0954766	0.132333	0.000731154	0.00698931	0.00608883	0.115283	0.0831757	1	0.00660434		0.11964	0.0847219	1	1.21097	0.00545377	0.0987974	0.0699622	0.825787	1	-0.000134293	0.000212514	-0.00019152	1.00002	-1.10962
146.8	1.16183	0.090758	0.133136	-0.00519477	0.00308695	1.16352	0.097308	0.134262	0.000910991	0.00739031	0.0063517	0.115393	0.0836327	1	0.00688947		0.119755	0.0851874	1	1.21183	0.00568518	0.0988211	0.0702964	0.825197	1	0.00123788	0.000302196	0.000117077	0.999236	2.58117
147	1.16264	0.0903518	0.133152	-0.00546263	0.00284293	1.16433	0.0969019	0.134278	0.000643131	0.00714629	0.0061377	0.115327	0.0832257	1	0.00665735		0.119686	0.0847728	1	1.21112	0.00549688	0.0988226	0.0699956	0.825685	1	1.46855e-05	0.000249883	-0.000134105	0.99988	-1.86333
147.2	1.175	0.091615	0.134569	-0.00526008	0.0032696	1.17668	0.098165	0.135695	0.000845675	0.00757297	0.00643585	0.11532	0.0834251	1	0.00698074		0.119678	0.0849759	1	1.21163	0.00576143	0.0987742	0.0701333	0.825331	1	0.000611035	0.000233959	0.000215827	0.99938	1.08401		1.08401
147.4	1.16578	0.09043	0.133276	-0.00544606	0.00296689	1.16747	0.09698	0.134402	0.000659699	0.00727026	0.00622737	0.115122	0.0830687	1	0.00675461		0.119473	0.0846129	1	1.21084	0.00557845	0.0986698	0.0698794	0.825872	1	-0.000456592	6.45311e-05	-2.88813e-05	1.00009	-2.23436
147.6	1.19793	0.0932476	0.137387	-0.00524197	0.0034263	1.19962	0.0997976	0.138513	0.000863792	0.00772967	0.00644343	0.115465	0.0831911	1	0.00698897		0.119828	0.0847376	1	1.21155	0.0057686	0.0989046	0.0699412	0.825386	1	-9.97225e-05	0.000362836	0.000224769	0.99944	1.61426		1.61426
147.8	1.23997	0.0968238	0.142205	-0.00535509	0.00337437	1.24166	0.103374	0.143332	0.000750672	0.00767774	0.00618346	0.115436	0.0832547	1	0.00670699	0.00683216	0.119799	0.0848024	1	1.21131	0.00553698	0.0989002	0.070009	0.825554	1	9.87775e-05	0.000345557	-8.03513e-05	0.999707	-4.30058			0.799158
148	1.23291	0.0961126	0.140669	-0.00529205	0.00361249	1.2346	0.102663	0.141795	0.000813712	0.00791586	0.00641169	0.114851	0.0831548	1	0.00695454		0.119192	0.0847006	1	1.21085	0.00574354	0.0984367	0.0699515	0.825868	1	-0.000193131	-0.000183689	0.000187512	1.00005	-0.97961		-0.97961
148.2	1.14338	0.0890596	0.130583	-0.005344	0.00302689	1.14507	0.0956096	0.131709	0.000761757	0.00733026	0.00640159	0.115023	0.0834969	1	0.00694359		0.11937	0.0850491	1	1.21136	0.00573205	0.0985419	0.0702094	0.825517	1	0.000836425	-3.00324e-05	0.00017561	0.999622	-0.171018		-0.171018
148.4	1.10932	0.0859523	0.127139	-0.00547109	0.00260449	1.11101	0.0925023	0.128265	0.000634666	0.00690786	0.00621762	0.115449	0.0832595	1	0.00674404		0.119812	0.0848072	1	1.21136	0.00556731	0.098907	0.0700097	0.825516	1	0.000112027	0.000356254	-4.02462e-05	0.999653	-8.85187
148.6	1.15626	0.0900843	0.132786	-0.00536833	0.00300701	1.15795	0.0966343	0.133912	0.000737433	0.00731037	0.00631322	0.115646	0.0834531	1	0.00684773		0.120017	0.0850044	1	1.21187	0.00565055	0.0990344	0.0701432	0.825172	1	0.000689642	0.000528812	7.19619e-05	0.999207	7.34849
148.8	1.15885	0.0900208	0.132383	-0.00538912	0.00308689	1.16053	0.0965709	0.133509	0.000716641	0.00739025	0.00636797	0.115041	0.0832124	1	0.00690712		0.119389	0.0847593	1	1.21106	0.00570339	0.0985824	0.069988	0.825726	1	-2.29942e-05	-1.28552e-05	0.000136183	0.999883	-0.0943967
149	1.12562	0.0870392	0.128644	-0.00547704	0.00289478	1.12731	0.0935892	0.12977	0.000628717	0.00719814	0.00638526	0.115115	0.0830202	1	0.00692587		0.119466	0.0845636	1	1.21096	0.00571935	0.0986542	0.0698321	0.825794	1	-0.000605995	5.29602e-05	0.000156512	0.999959	0.338378
149.2	1.11508	0.0868422	0.127942	-0.00534628	0.00275742	1.11677	0.0933922	0.129069	0.00075948	0.00706078	0.00632252	0.115573	0.0836273	1	0.00685782		0.119941	0.0851819	1	1.21198	0.00565836	0.0989631	0.0702832	0.825095	1	0.00121748	0.000463772	8.2862e-05	0.999115	5.59692
149.4	1.15786	0.0899875	0.132758	-0.00527651	0.00297342	1.15955	0.0965376	0.133884	0.00082925	0.00727678	0.0062755	0.115462	0.0832541	1	0.00680682		0.119826	0.0848017	1	1.21143	0.00561881	0.0989124	0.0700011	0.825468	1	9.4195e-05	0.000366078	2.76905e-05	0.99958	13.2203
149.6	1.17165	0.0913547	0.134198	-0.00525602	0.00321243	1.17334	0.0979047	0.135324	0.00084974	0.0075158	0.00640546	0.115332	0.0834409	1	0.00694778		0.119691	0.084992	1	1.21163	0.00573424	0.0987853	0.0701468	0.825334	1	0.000658973	0.000246185	0.000180168	0.99939	1.36642		1.36642
149.8	1.17797	0.0916713	0.134726	-0.00520718	0.00304265	1.17966	0.0982213	0.135853	0.000898582	0.00734602	0.00622722	0.115162	0.0832621	1	0.00675445	0.00686898	0.119515	0.0848099	1	1.21108	0.00557721	0.0986845	0.0700284	0.82571	1	0.000127201	0.00010008	-2.9049e-05	0.999894	-3.44522			0.0719302
150	1.1423	0.0884685	0.130516	-0.00533803	0.00276953	1.14399	0.0950185	0.131642	0.000767733	0.0070729	0.00618268	0.115073	0.0830591	1	0.00670614		0.119422	0.0846032	1	1.21073	0.00553891	0.0986363	0.0698777	0.825947	1	-0.00048319	2.17061e-05	-8.13794e-05	1.00019	-0.266727
150.2	1.16005	0.090318	0.132982	-0.00523992	0.00290913	1.16174	0.096868	0.134108	0.000865838	0.00721249	0.00620837	0.115438	0.0833821	1	0.00673401		0.119801	0.0849321	1	1.21147	0.00555856	0.0988889	0.0701068	0.825446	1	0.000482939	0.000346504	-5.1105e-05	0.99957	-6.78024
150.4	1.12299	0.0871175	0.128332	-0.00531648	0.00277233	1.12468	0.0936675	0.129458	0.000789284	0.0070757	0.00629132	0.115107	0.0832839	1	0.00682397		0.119458	0.0848322	1	1.21111	0.00563446	0.0986346	0.0700447	0.825686	1	0.000193177	4.89179e-05	4.61965e-05	0.999851	1.05891
150.6	1.08123	0.0835504	0.123693	-0.0053479	0.00265698	1.08292	0.0901004	0.124819	0.000757859	0.00696034	0.00642736	0.115261	0.0832011	1	0.00697154		0.119617	0.0847478	1	1.21134	0.00575524	0.0987483	0.0699622	0.825534	1	-6.39438e-05	0.00018195	0.000205908	0.99963	0.883648		0.883648
150.8	1.12655	0.0873738	0.129087	-0.00548179	0.00295336	1.12824	0.0939238	0.130213	0.000623965	0.00725673	0.0064319	0.115413	0.0832481	1	0.00697646		0.119775	0.0847957	1	1.21155	0.00575831	0.0988611	0.0699896	0.825391	1	7.41832e-05	0.000317214	0.000211225	0.999451	1.50178		1.50178
151	1.13874	0.0885846	0.130644	-0.00535238	0.00297601	1.14043	0.0951346	0.13177	0.000753383	0.00727938	0.00638299	0.115544	0.0834197	1	0.00692341		0.119911	0.0849704	1	1.2118	0.00571331	0.0989524	0.0701189	0.825215	1	0.000590051	0.000435717	0.000153821	0.999246	2.83262
151.2	1.16692	0.0908266	0.133377	-0.00527938	0.0030328	1.16861	0.0973766	0.134503	0.000826378	0.00733616	0.00627769	0.115097	0.0833269	1	0.00680919		0.119447	0.084876	1	1.21113	0.00562217	0.0986243	0.0700798	0.825674	1	0.000323664	4.02658e-05	3.01944e-05	0.999839	1.33355
151.4	1.1503	0.0892132	0.131406	-0.00555424	0.00290005	1.15199	0.0957633	0.132532	0.000551516	0.00720342	0.00625301	0.115046	0.0831284	1	0.00678243		0.119394	0.0846738	1	1.21085	0.00560138	0.0986037	0.0699292	0.825866	1	-0.000274498	-4.3075e-06	1.21768e-06	1.00008	-3.53748
151.6	1.18372	0.0925332	0.135723	-0.00512598	0.00334003	1.18541	0.0990832	0.136849	0.000979781	0.0076434	0.00644791	0.115445	0.0835857	1	0.00699382		0.119808	0.0851396	1	1.21194	0.00577076	0.0988562	0.0702506	0.825122	1	0.00109261	0.000344952	0.00022994	0.999121	1.50018		1.50018
151.8	1.17085	0.0911462	0.133859	-0.00529561	0.00303441	1.17253	0.0976963	0.134985	0.000810153	0.00733777	0.00625804	0.115123	0.0833206	1	0.00678788	0.00685089	0.119474	0.0848695	1	1.21113	0.00560458	0.0986463	0.0700746	0.825675	1	0.000304173	6.36045e-05	7.13747e-06	0.999845	8.91134			1.2952
152	1.16192	0.0906091	0.133191	-0.00536438	0.00315427	1.16361	0.0971591	0.134317	0.000741381	0.00745764	0.00640905	0.115431	0.083498	1	0.00695167		0.119794	0.0850502	1	1.2118	0.00573667	0.0988565	0.0701852	0.825222	1	0.000828823	0.000334156	0.000184373	0.999251	1.81239		1.81239
152.2	1.15553	0.0895919	0.131957	-0.0053771	0.00306221	1.15722	0.0961419	0.133083	0.000728661	0.00736558	0.00636487	0.115002	0.0830798	1	0.00690375		0.119349	0.0846242	1	1.21088	0.00570145	0.0985638	0.0698867	0.825848	1	-0.000422817	-4.7327e-05	0.000132554	1.00003	-0.357041
152.4	1.13987	0.0885112	0.130565	-0.00519937	0.00291013	1.14156	0.0950612	0.131691	0.000906388	0.0072135	0.006319	0.115361	0.0832733	1	0.006854		0.119721	0.0848213	1	1.2114	0.00565793	0.0988288	0.0700194	0.825494	1	0.000153799	0.00027428	7.87237e-05	0.999604	3.48409
152.6	1.12147	0.0868907	0.128404	-0.00520296	0.00259065	1.12315	0.0934407	0.129531	0.000902801	0.00689402	0.00613809	0.115328	0.0831949	1	0.00665777		0.119686	0.0847414	1	1.21109	0.00549736	0.0988256	0.0699715	0.825706	1	-7.84195e-05	0.000250465	-0.000133659	0.999905	-1.87391
152.8	1.17207	0.0917537	0.134405	-0.00531961	0.00331931	1.17376	0.0983038	0.135531	0.000786145	0.00762268	0.00649424	0.115468	0.0837512	1	0.00704408		0.119832	0.0853081	1	1.21218	0.00581107	0.098856	0.0703755	0.824957	1	0.00159038	0.000363848	0.00028425	0.998909	1.28003		1.28003
153	1.2778	0.099818	0.145861	-0.0054131	0.00385978	1.27949	0.106368	0.146988	0.000692656	0.00816314	0.00638	0.11488	0.0831331	1	0.00692016		0.119222	0.0846786	1	1.21082	0.00571527	0.0984635	0.0699349	0.825886	1	-0.000258687	-0.000157005	0.000150302	1.00008	-1.04459
153.2	1.02415	0.0786487	0.115883	-0.00538299	0.00207247	1.02584	0.0851987	0.117009	0.000722771	0.00637583	0.00621522	0.114061	0.0830525	1	0.00674144		0.118372	0.0845964	1	1.20971	0.00557277	0.0978518	0.0699311	0.826644	1	-0.000478719	-0.000883381	-4.33881e-05	1.00106	20.36
153.4	0.88992	0.0674777	0.101702	-0.00553782	0.00121182	0.891608	0.0740277	0.102828	0.00056794	0.00551518	0.00618566	0.115329	0.0830271	1	0.00670937		0.119688	0.0845706	1	1.21097	0.0055405	0.0988364	0.0698372	0.825786	1	-0.000586405	0.000250156	-7.78171e-05	0.999991	-3.21466
153.6	0.80386	0.0607694	0.0922308	-0.00545431	0.000784343	0.805548	0.0673195	0.0933571	0.000651446	0.00508771	0.00631583	0.115893	0.0835697	1	0.00685056		0.120273	0.0851232	1	1.21225	0.00565113	0.0992147	0.0702194	0.824915	1	0.00103534	0.000748554	7.50561e-05	0.998888	9.97327
153.8	0.963562	0.0741538	0.111378	-0.0054992	0.0019842	0.965251	0.0807039	0.112505	0.000606556	0.00628756	0.00651392	0.116555	0.0836092	1	0.00706542	0.00686982	0.12096	0.0851635	1	1.21319	0.00582384	0.0997041	0.070198	0.824274	1	0.00113274	0.0013318	0.000307279	0.998046	4.33417		4.33417	2.47553
154	1.0778	0.0835296	0.123789	-0.00543546	0.0024731	1.07949	0.0900796	0.124915	0.000670296	0.00677647	0.00627747	0.115717	0.0834465	1	0.00680896		0.12009	0.0849977	1	1.2119	0.00561843	0.0990929	0.0701361	0.825153	1	0.00066865	0.000593293	3.00376e-05	0.999191	19.7517
154.2	1.06864	0.0825004	0.122042	-0.0053508	0.00249169	1.07032	0.0890504	0.123168	0.000754963	0.00679506	0.0063486	0.115076	0.0831995	1	0.00688611		0.119425	0.0847462	1	1.21106	0.00568603	0.0986121	0.069977	0.825725	1	-6.229e-05	1.8836e-05	0.000113445	0.999885	0.166037
154.4	1.07625	0.0832966	0.123302	-0.00522667	0.00255555	1.07794	0.0898466	0.124428	0.000879091	0.00685892	0.00636298	0.115432	0.0833502	1	0.00690171		0.119794	0.0848997	1	1.2116	0.00569638	0.0988732	0.0700726	0.825358	1	0.00038355	0.000336089	0.000130341	0.999427	2.57854
154.6	1.1206	0.0871825	0.128686	-0.00541328	0.00261222	1.12229	0.0937326	0.129812	0.000692475	0.00691559	0.00616203	0.115667	0.083519	1	0.00668374		0.120039	0.0850716	1	1.21179	0.00551558	0.0990586	0.070203	0.825223	1	0.000891404	0.000552502	-0.000105423	0.999305	-5.24084
154.8	1.14084	0.0886091	0.130695	-0.00535824	0.00308786	1.14253	0.0951592	0.131821	0.000747515	0.00739123	0.0064692	0.115377	0.0832884	1	0.00701692		0.119738	0.0848367	1	1.21159	0.00579149	0.0988267	0.0700209	0.825361	1	0.000196036	0.000283917	0.000254983	0.999407	1.11347		1.11347
155	1.13797	0.0883786	0.130186	-0.00534608	0.00299309	1.13966	0.0949286	0.131313	0.000759679	0.00729646	0.00640229	0.11522	0.0832953	1	0.00694435		0.119575	0.0848437	1	1.21136	0.00573267	0.0987112	0.0700399	0.825516	1	0.000222193	0.000146389	0.000176468	0.999615	0.829549		0.829549
155.2	1.08229	0.0836714	0.12373	-0.00541032	0.00229219	1.08398	0.0902214	0.124856	0.000695443	0.00659556	0.00608459	0.115183	0.0832318	1	0.00659974		0.119537	0.084779	1	1.21092	0.00545021	0.098716	0.0700123	0.825821	1	3.79642e-05	0.000123529	-0.000196524	1.00006	-0.628573
155.4	1.14088	0.088667	0.130968	-0.0052634	0.00313283	1.14257	0.0952171	0.132094	0.000842359	0.0074362	0.00650831	0.115612	0.0833359	1	0.00705934		0.119981	0.0848851	1	1.21193	0.00582489	0.0990003	0.0700415	0.825133	1	0.000332555	0.0004918	0.000300841	0.999115	1.63475		1.63475
155.6	1.09828	0.0849441	0.125318	-0.00511658	0.002552	1.09997	0.0914941	0.126445	0.000989176	0.00685537	0.00623231	0.114953	0.0831786	1	0.00675997		0.119297	0.0847248	1	1.21078	0.00558315	0.0985291	0.0699753	0.825912	1	-0.000120079	-8.72604e-05	-2.31126e-05	1.00014	3.77544
155.8	1.09963	0.0852266	0.125747	-0.00545486	0.00279484	1.10132	0.0917766	0.126873	0.000650896	0.00709821	0.00644521	0.115201	0.0833336	1	0.00699089	0.00686517	0.119555	0.0848828	1	1.21143	0.00577078	0.0986896	0.0700683	0.825471	1	0.000337663	0.000128053	0.000226824	0.999551	0.564546		0.564546	1.03558
156	1.14945	0.0894694	0.131403	-0.00521699	0.00304817	1.15114	0.0960194	0.13253	0.000888772	0.00735154	0.00638629	0.115129	0.0834122	1	0.00692699		0.11948	0.0849628	1	1.21137	0.00571831	0.098632	0.0701378	0.825512	1	0.000578149	6.49158e-05	0.000157664	0.999617	0.411734
156.2	1.1231	0.0871709	0.128069	-0.00529853	0.0028903	1.12479	0.0937209	0.129195	0.000807226	0.00719367	0.00639559	0.114862	0.0833233	1	0.00693708		0.119203	0.0848723	1	1.21101	0.00572833	0.0984327	0.0700837	0.825755	1	0.000316257	-0.000173374	0.000168583	0.999917	-1.02842
156.4	1.12442	0.0872315	0.128775	-0.00529888	0.00270324	1.12611	0.0937815	0.129901	0.000806878	0.00700661	0.00622198	0.115354	0.0832795	1	0.00674877		0.119714	0.0848276	1	1.21129	0.00557156	0.0988317	0.0700308	0.825566	1	0.000174796	0.000271421	-3.51501e-05	0.999715	-7.72175
156.6	1.12763	0.0874042	0.128843	-0.00522107	0.00279359	1.12931	0.0939542	0.12997	0.000884688	0.00709696	0.0062843	0.115087	0.0831958	1	0.00681637		0.119437	0.0847423	1	1.211	0.00562873	0.0986271	0.0699774	0.825767	1	-7.2653e-05	3.1304e-05	3.79639e-05	0.999951	0.824573
156.8	1.10449	0.0858313	0.126565	-0.00537939	0.00268542	1.10618	0.0923813	0.127691	0.000726366	0.00698879	0.00631794	0.115434	0.0835138	1	0.00685285		0.119797	0.0850663	1	1.21172	0.00565549	0.0988657	0.0702031	0.825276	1	0.000878433	0.000340001	7.7478e-05	0.999338	4.38836
157	1.15333	0.0896057	0.132062	-0.00522591	0.00311562	1.15502	0.0961557	0.133188	0.000879854	0.00741899	0.00642323	0.115312	0.08325	1	0.00696706		0.11967	0.0847976	1	1.21144	0.00575108	0.0987841	0.0699976	0.825467	1	8.25863e-05	0.00022771	0.000201054	0.999548	1.13259		1.13259
157.2	1.11608	0.0865183	0.127423	-0.00533714	0.00274455	1.11777	0.0930683	0.128549	0.000768614	0.00704792	0.00630536	0.115006	0.0832627	1	0.0068392		0.119352	0.0848105	1	1.211	0.00564756	0.0985566	0.0700333	0.825763	1	0.000131274	-4.22751e-05	6.26646e-05	0.999943	-0.674624
157.4	1.12159	0.0872292	0.128632	-0.00512649	0.00280445	1.12328	0.0937792	0.129759	0.00097927	0.00710781	0.00632773	0.115518	0.0834869	1	0.00686347		0.119884	0.0850389	1	1.21179	0.00566393	0.0989313	0.0701765	0.825228	1	0.000795013	0.00041393	8.8976e-05	0.999276	4.65215
157.6	1.12669	0.0874777	0.129132	-0.00532853	0.00299028	1.12838	0.0940277	0.130258	0.000777228	0.00729364	0.00646384	0.115439	0.0833302	1	0.00701111		0.119802	0.0848793	1	1.21169	0.00578621	0.0988713	0.0700502	0.825292	1	0.000320707	0.000339015	0.000248689	0.999323	1.36321		1.36321
157.8	1.11631	0.0866934	0.127846	-0.00529944	0.00278137	1.118	0.0932434	0.128972	0.000806322	0.00708474	0.006337	0.11536	0.0834023	1	0.00687352	0.00688364	0.11972	0.0849527	1	1.21155	0.00567335	0.0988161	0.0701192	0.825391	1	0.000543152	0.000273297	9.98408e-05	0.999476	2.73733			1.2479
158	1.14119	0.0886506	0.130419	-0.00516041	0.00299244	1.14288	0.0952006	0.131545	0.000945348	0.00729581	0.00638368	0.115099	0.0832986	1	0.00692416		0.119449	0.0848471	1	1.21122	0.00571668	0.0986191	0.0700509	0.825613	1	0.000235682	3.88892e-05	0.000154618	0.999741	0.251518
158.2	1.13616	0.0884666	0.130367	-0.00511597	0.00301626	1.13784	0.0950166	0.131493	0.000989786	0.00731963	0.0064329	0.115563	0.0835058	1	0.00697754		0.119931	0.0850582	1	1.21197	0.0057572	0.0989557	0.0701819	0.825105	1	0.000848553	0.000451285	0.000212348	0.9991	2.12522		2.12522
158.4	1.10506	0.0853935	0.12625	-0.00536336	0.00251801	1.10675	0.0919435	0.127376	0.000742397	0.00682137	0.00616341	0.11509	0.0830749	1	0.00668523		0.11944	0.0846193	1	1.21074	0.00552159	0.0986499	0.0698903	0.825938	1	-0.00043544	3.75803e-05	-0.000104006	1.00019	-0.36133
158.6	1.06922	0.0824718	0.122229	-0.00538827	0.00239651	1.07091	0.0890218	0.123355	0.00071749	0.00669988	0.00625624	0.115187	0.0831271	1	0.00678592		0.119541	0.0846724	1	1.211	0.00560357	0.0987125	0.0699195	0.825764	1	-0.000282032	0.000121448	5.02606e-06	0.999952	24.1636
158.8	1.06967	0.0828201	0.122434	-0.00524558	0.00240841	1.07136	0.0893701	0.123561	0.000860183	0.00671178	0.00626473	0.115331	0.0834175	1	0.00679514		0.11969	0.0849682	1	1.21145	0.00560908	0.0987984	0.0701375	0.825455	1	0.000591574	0.000249185	1.50253e-05	0.999571	16.5843
159	1.14142	0.0885862	0.131076	-0.00531307	0.00288962	1.14311	0.0951362	0.132202	0.000792685	0.00719299	0.00629248	0.115651	0.0832259	1	0.00682523		0.120022	0.084773	1	1.21162	0.00563314	0.0990591	0.0699666	0.825341	1	3.80307e-06	0.000534165	4.76419e-05	0.999417	11.2121
159.2	1.14811	0.0893726	0.131181	-0.00513359	0.00289939	1.14979	0.0959226	0.132307	0.000972174	0.00720276	0.00626439	0.11507	0.0834259	1	0.00679476		0.119419	0.0849767	1	1.21119	0.00560998	0.0985967	0.0701596	0.825634	1	0.000623542	1.68815e-05	1.45702e-05	0.999795	1.15863
159.4	1.09924	0.0851456	0.125745	-0.00534228	0.00295457	1.10093	0.0916956	0.126872	0.000763478	0.00725794	0.00659254	0.11524	0.0832891	1	0.0071507		0.119596	0.0848374	1	1.21158	0.00590194	0.0987102	0.0700219	0.825366	1	0.00019901	0.000157897	0.000399704	0.999387	0.395034		0.395034
159.6	1.09461	0.0850966	0.124989	-0.00539991	0.00265934	1.0963	0.0916467	0.126115	0.00070585	0.00696271	0.00635108	0.115036	0.0835961	1	0.0068888		0.119384	0.0851501	1	1.21142	0.00568653	0.0985487	0.0702893	0.825475	1	0.00113664	-1.6229e-05	0.000116314	0.999584	-0.139528
159.8	1.12914	0.087584	0.129466	-0.00553418	0.0027045	1.13083	0.094134	0.130593	0.000571577	0.00700787	0.00619709	0.115484	0.0832431	1	0.00672177	0.00685492	0.119848	0.0847905	1	1.21136	0.00554894	0.0989369	0.0699961	0.825518	1	6.20337e-05	0.000387852	-6.43468e-05	0.999659	-6.02753			1.26013
160	1.09798	0.0849702	0.125454	-0.00532235	0.00253216	1.09967	0.0915203	0.12658	0.000783407	0.00683553	0.00621598	0.115107	0.0832251	1	0.00674225		0.119458	0.0847722	1	1.21097	0.00556764	0.0986461	0.0700034	0.825783	1	1.68882e-05	5.12954e-05	-4.22606e-05	0.999986	-1.21379
160.2	1.09029	0.0844556	0.124727	-0.00511107	0.00274957	1.09198	0.0910056	0.125853	0.000994691	0.00705293	0.00645885	0.115252	0.08334	1	0.00700569		0.119608	0.0848892	1	1.2115	0.00578264	0.0987268	0.0700694	0.825421	1	0.000355161	0.000172648	0.000242826	0.999486	0.710998		0.710998
160.4	1.10421	0.0856381	0.126621	-0.0052421	0.00266984	1.1059	0.0921881	0.127747	0.000863657	0.00697321	0.00630545	0.115514	0.0833601	1	0.0068393		0.11988	0.0849098	1	1.21163	0.00564472	0.098941	0.070079	0.825335	1	0.000412576	0.000411359	6.28399e-05	0.999411	6.54615
160.6	1.17754	0.0921147	0.134856	-0.00526077	0.00339703	1.17923	0.0986647	0.135982	0.000844988	0.00770039	0.00653	0.115314	0.0836686	1	0.00708287		0.119672	0.0852239	1	1.21198	0.00584405	0.0987413	0.070318	0.825097	1	0.0013443	0.000225869	0.000326223	0.999074	0.692374		0.692374
160.8	1.13847	0.0884488	0.129864	-0.00523658	0.00287723	1.14016	0.0949989	0.13099	0.000869177	0.0071806	0.00629789	0.114888	0.0833207	1	0.0068311		0.11923	0.0848696	1	1.21093	0.0056412	0.0984614	0.0700862	0.825811	1	0.000309635	-0.000147311	5.38771e-05	1.00001	-2.73421
161	1.12676	0.0876036	0.128868	-0.00530583	0.00285392	1.12844	0.0941536	0.129994	0.000799926	0.00715729	0.00634261	0.115198	0.0834366	1	0.00687961		0.119552	0.0849877	1	1.21142	0.00567897	0.0986873	0.0701555	0.825478	1	0.000650973	0.000128085	0.000106406	0.999584	1.20374
161.2	1.1174	0.0865177	0.127809	-0.00525663	0.00291549	1.11909	0.0930678	0.128935	0.000849125	0.00721886	0.00645064	0.115214	0.0831637	1	0.00699679		0.119568	0.0847096	1	1.21127	0.00577638	0.0987129	0.0699343	0.825576	1	-0.000176363	0.000139125	0.000233234	0.999677	0.596506		0.596506
161.4	1.12152	0.0871941	0.128405	-0.00525063	0.00277642	1.1232	0.0937441	0.129531	0.000855133	0.00707978	0.0063032	0.115323	0.0834613	1	0.00683686		0.119681	0.0850128	1	1.21153	0.00564316	0.0987851	0.0701697	0.825402	1	0.000723142	0.00024076	6.01671e-05	0.999498	4.00152
161.6	1.15777	0.0902123	0.132316	-0.00517012	0.00287879	1.15946	0.0967623	0.133442	0.00093564	0.00718215	0.00619442	0.11509	0.083455	1	0.00671887		0.11944	0.0850064	1	1.21117	0.00554744	0.0986159	0.0701856	0.825651	1	0.000712486	3.69052e-05	-6.75646e-05	0.999832	-0.546221
161.8	1.14114	0.0886045	0.130653	-0.00531613	0.0031237	1.14282	0.0951545	0.13178	0.000789632	0.00742706	0.00649887	0.115311	0.0832627	1	0.0070491	0.00689824	0.119669	0.0848105	1	1.21153	0.00581835	0.0987749	0.0700029	0.825404	1	0.000119317	0.000223647	0.000289806	0.999453	0.771715		0.771715	0.692898
162	1.13782	0.0881693	0.130078	-0.00539619	0.00296531	1.13951	0.0947193	0.131205	0.000709572	0.00726867	0.0063788	0.115142	0.0831231	1	0.00691886		0.119493	0.0846683	1	1.21108	0.00571296	0.0986668	0.0699114	0.825709	1	-0.000295555	7.68972e-05	0.000148908	0.999856	0.516406
162.2	1.08898	0.0843241	0.124508	-0.00524379	0.00272524	1.09066	0.0908741	0.125635	0.000861972	0.00702861	0.00644434	0.115191	0.0833199	1	0.00698995		0.119545	0.0848688	1	1.2114	0.00577012	0.0986827	0.0700583	0.825489	1	0.000296475	0.000118763	0.000225804	0.999573	0.525957		0.525957
162.4	1.09956	0.0852498	0.126123	-0.00537218	0.0027161	1.10125	0.0917998	0.127249	0.000733579	0.00701947	0.00637407	0.11555	0.0833595	1	0.00691374		0.119917	0.0849091	1	1.21174	0.00570563	0.0989626	0.070072	0.82526	1	0.000408163	0.000441077	0.000143363	0.999302	3.07664
162.6	1.16069	0.0900338	0.133064	-0.005453	0.00294479	1.16238	0.0965838	0.13419	0.000652757	0.00724816	0.00623564	0.115445	0.0830917	1	0.00676358		0.119808	0.0846363	1	1.21121	0.00558416	0.0989161	0.0698776	0.825622	1	-0.000395191	0.000351944	-1.91063e-05	0.999777	-18.4203
162.8	1.14848	0.089149	0.131172	-0.00511725	0.00294574	1.15017	0.095699	0.132298	0.000988513	0.0072491	0.00630263	0.115025	0.0832042	1	0.00683625		0.119372	0.0847509	1	1.21096	0.00564532	0.0985766	0.0699866	0.825792	1	-4.60967e-05	-2.49893e-05	5.94744e-05	0.999978	-0.420169
163	1.11479	0.0866436	0.127682	-0.00547011	0.0028465	1.11647	0.0931936	0.128808	0.00063565	0.00714986	0.00640396	0.115371	0.0834713	1	0.00694616		0.119731	0.085023	1	1.2117	0.00573257	0.0988124	0.0701684	0.825287	1	0.000749995	0.000280288	0.000178407	0.999333	1.57106		1.57106
163.2	1.14215	0.0887836	0.131059	-0.00518222	0.00280153	1.14384	0.0953336	0.132185	0.000923544	0.00710489	0.00621142	0.115563	0.0833451	1	0.00673732		0.11993	0.0848944	1	1.21156	0.00556085	0.0989881	0.0700702	0.825381	1	0.000367866	0.000457751	-4.7494e-05	0.999487	-9.63807
163.4	1.14232	0.0887879	0.130443	-0.0054521	0.00291281	1.14401	0.0953379	0.13157	0.000653655	0.00721617	0.00630779	0.115007	0.0833365	1	0.00684184		0.119354	0.0848857	1	1.21108	0.00564936	0.0985515	0.0700909	0.825708	1	0.000354353	-4.08738e-05	6.5513e-05	0.999877	-0.623904
163.6	1.15086	0.0893898	0.131943	-0.00524962	0.00303119	1.15255	0.0959398	0.133069	0.00085614	0.00733455	0.00636377	0.115457	0.0832415	1	0.00690257		0.11982	0.084789	1	1.21151	0.00569748	0.0989014	0.0699861	0.825415	1	5.45966e-05	0.000358302	0.000131285	0.999495	2.72919
163.8	1.15636	0.0902827	0.132472	-0.00541229	0.00300672	1.15805	0.0968327	0.133598	0.000693473	0.00731009	0.00631243	0.115365	0.0836173	1	0.00684687	0.00686971	0.119725	0.0851717	1	1.21174	0.00565043	0.0988042	0.0702885	0.825257	1	0.00119298	0.00027843	7.09941e-05	0.999319	3.92188			1.04851
164	1.1549	0.0898375	0.132053	-0.00524015	0.00288061	1.15659	0.0963876	0.133179	0.000865608	0.00718398	0.00621136	0.115148	0.0833379	1	0.00673725		0.1195	0.0848871	1	1.21112	0.0055628	0.0986688	0.0700895	0.825679	1	0.000356793	8.79895e-05	-4.76674e-05	0.99986	-1.84591
164.2	1.14202	0.0885617	0.130654	-0.005335	0.00304041	1.1437	0.0951117	0.13178	0.000770755	0.00734377	0.00642105	0.115222	0.0831611	1	0.00696469		0.119577	0.0847071	1	1.21125	0.00575001	0.0987221	0.0699337	0.825594	1	-0.000183626	0.000147372	0.000198499	0.999705	0.742435		0.742435
164.4	1.15557	0.0900861	0.132473	-0.00516229	0.00300297	1.15726	0.0966361	0.133599	0.000943472	0.00730634	0.00631349	0.115445	0.0835044	1	0.00684803		0.119808	0.0850567	1	1.21171	0.00565153	0.0988747	0.0701955	0.825278	1	0.000850049	0.000349129	7.22587e-05	0.999342	4.83166
164.6	1.14108	0.0887372	0.130453	-0.00534583	0.00289855	1.14277	0.0952872	0.131579	0.000759932	0.00720192	0.00630214	0.11514	0.0833824	1	0.00683571		0.119492	0.0849324	1	1.21126	0.00564347	0.0986509	0.0701191	0.825587	1	0.000489533	7.794e-05	5.88997e-05	0.999727	1.32327
164.8	1.15509	0.0899048	0.132408	-0.00520705	0.00291689	1.15678	0.0964548	0.133535	0.000898705	0.00722025	0.00624169	0.115437	0.0833823	1	0.00677015		0.1198	0.0849324	1	1.2115	0.00558823	0.0988851	0.070105	0.825422	1	0.000482989	0.000344471	-1.19948e-05	0.999533	-28.7183
165	1.14184	0.0887845	0.130852	-0.00560673	0.00319462	1.14353	0.0953345	0.131979	0.000499033	0.00749799	0.0065569	0.115414	0.0833689	1	0.00711204		0.119776	0.0849187	1	1.21181	0.00586896	0.0988407	0.0700761	0.825214	1	0.000436329	0.000313935	0.000357848	0.999207	0.877287		0.877287
165.2	1.14969	0.0895205	0.131663	-0.00535718	0.0028831	1.15138	0.0960705	0.132789	0.000748581	0.00718647	0.0062416	0.11533	0.0834393	1	0.00677005		0.119689	0.0849904	1	1.21145	0.00558839	0.0987983	0.070156	0.825457	1	0.000657904	0.000249604	-1.21223e-05	0.999579	-20.5905
165.4	1.14361	0.0886537	0.130891	-0.00537071	0.00310705	1.1453	0.0952038	0.132017	0.000735053	0.00741042	0.00647028	0.115269	0.0831255	1	0.00701809		0.119625	0.0846708	1	1.21131	0.00579378	0.0987566	0.0698999	0.82555	1	-0.000293502	0.000187314	0.000256287	0.999638	0.730878		0.730878
165.6	1.16427	0.0904666	0.133139	-0.00530838	0.00313045	1.16596	0.0970166	0.134265	0.000797383	0.00743382	0.00637569	0.115154	0.0832073	1	0.00691549		0.119506	0.0847541	1	1.21118	0.00570974	0.0986693	0.0699767	0.825644	1	-4.1359e-05	8.76285e-05	0.000145256	0.999779	0.603267
165.8	1.16985	0.0909137	0.133829	-0.00517398	0.00301047	1.17154	0.0974637	0.134955	0.000931774	0.00731384	0.00624292	0.115194	0.0831928	1	0.00677148	0.0068743	0.119548	0.0847393	1	1.21106	0.00559137	0.0987137	0.0699712	0.825724	1	-8.35985e-05	0.000128283	-1.06021e-05	0.999906	-12.0998			0.783533
166	1.16321	0.0907237	0.133259	-0.00553343	0.00309235	1.1649	0.0972738	0.134386	0.000572326	0.00739572	0.00634878	0.115362	0.0835038	1	0.00688631		0.119722	0.0850561	1	1.21166	0.00568334	0.098808	0.0701977	0.825311	1	0.000849411	0.000274496	0.00011366	0.999375	2.41507
166.2	1.14591	0.0890086	0.1311	-0.00552937	0.00284435	1.1476	0.0955586	0.132226	0.000576392	0.00714772	0.0062284	0.11522	0.0832681	1	0.00675573		0.119574	0.084816	1	1.21115	0.00557796	0.0987282	0.0700296	0.825664	1	0.000143775	0.000151251	-2.76503e-05	0.999836	-5.47014
166.4	1.161	0.0904217	0.133026	-0.00530526	0.00319536	1.16269	0.0969717	0.134152	0.0008005	0.00749873	0.00644948	0.115381	0.0834031	1	0.00699553		0.119742	0.0849535	1	1.21169	0.00577336	0.0988221	0.0701116	0.825293	1	0.000542773	0.000288118	0.000231825	0.999329	1.24282		1.24282
166.6	1.16743	0.0910591	0.133706	-0.00510705	0.00306843	1.16912	0.0976091	0.134832	0.000998707	0.00737179	0.00630542	0.115328	0.0834893	1	0.00683927		0.119686	0.0850414	1	1.21157	0.00564498	0.0987863	0.0701912	0.825377	1	0.000807656	0.000244989	6.27673e-05	0.999467	3.90313
166.8	1.15241	0.0895709	0.132019	-0.00540699	0.00300618	1.1541	0.0961209	0.133145	0.000698772	0.00730955	0.00633353	0.115367	0.0832863	1	0.00686977		0.119727	0.0848345	1	1.21143	0.00567078	0.0988313	0.0700283	0.82547	1	0.000192614	0.000279453	9.57836e-05	0.999571	2.91755
167	1.17229	0.0912267	0.133894	-0.00543635	0.00317498	1.17398	0.0977767	0.13502	0.000669411	0.00747835	0.0063701	0.115011	0.0832867	1	0.00690942		0.119358	0.0848349	1	1.2111	0.00570507	0.0985528	0.0700477	0.825694	1	0.000202214	-3.97631e-05	0.000138667	0.999845	-0.286753
167.2	1.18122	0.0920401	0.135177	-0.00538044	0.00325257	1.18291	0.0985901	0.136303	0.000725323	0.00755594	0.00638757	0.115226	0.0833452	1	0.00692837		0.119581	0.0848946	1	1.2114	0.00571929	0.098713	0.0700795	0.825488	1	0.000373247	0.000152158	0.000159181	0.999585	0.955882
167.4	1.20073	0.0937788	0.137164	-0.00536851	0.00334488	1.20242	0.100329	0.13829	0.000737252	0.00764824	0.0063607	0.115009	0.0834389	1	0.00689923		0.119356	0.08499	1	1.21125	0.00569598	0.09854	0.0701675	0.825596	1	0.00066254	-4.06217e-05	0.000127621	0.999729	-0.318299
167.6	1.16457	0.0906196	0.133147	-0.00548247	0.00299867	1.16626	0.0971696	0.134273	0.000623292	0.00730204	0.00626109	0.115132	0.0833175	1	0.00679119		0.119483	0.0848664	1	1.21114	0.00560727	0.0986534	0.0700714	0.825668	1	0.000294714	7.18042e-05	1.07157e-05	0.999835	6.70083
167.8	1.15056	0.0893141	0.131808	-0.00535232	0.00298588	1.15225	0.0958641	0.132934	0.000753441	0.00728925	0.00632609	0.115369	0.0831972	1	0.00686169	0.00687365	0.119729	0.0847438	1	1.21133	0.00566457	0.0988407	0.069959	0.825536	1	-7.64601e-05	0.000281285	8.70502e-05	0.999653	3.2313			1.24282
168	1.17926	0.0918729	0.134896	-0.00535863	0.00323293	1.18095	0.0984229	0.136023	0.000747131	0.00753629	0.00638157	0.115181	0.0833424	1	0.00692187		0.119534	0.0848916	1	1.21135	0.00571419	0.0986787	0.0700803	0.825527	1	0.000365839	0.000111794	0.000152139	0.999634	0.734816
168.2	1.21349	0.0947739	0.138903	-0.00528709	0.00346613	1.21518	0.101324	0.140029	0.000818667	0.0077695	0.00639368	0.115233	0.0833816	1	0.00693501		0.119588	0.0849316	1	1.21145	0.00572453	0.0987145	0.0701071	0.825454	1	0.000482716	0.000157853	0.00016635	0.999541	0.948918
168.4	1.19134	0.0928398	0.1363	-0.00537059	0.00319357	1.19303	0.0993898	0.137426	0.000735165	0.00749694	0.00628396	0.115191	0.0833089	1	0.006816		0.119545	0.0848576	1	1.21122	0.00562739	0.0986978	0.0700597	0.825615	1	0.000266639	0.000123826	3.75742e-05	0.999764	3.2955
168.6	1.15535	0.0897565	0.132201	-0.00530849	0.00309632	1.15703	0.0963065	0.133327	0.000797265	0.00739968	0.00639539	0.115232	0.0832357	1	0.00693686		0.119587	0.084783	1	1.21131	0.00572676	0.0987255	0.069993	0.825555	1	4.20814e-05	0.000156661	0.000168377	0.999663	0.93042
168.8	1.14398	0.0887926	0.131014	-0.00541794	0.00282062	1.14566	0.0953426	0.13214	0.000687818	0.00712399	0.00621822	0.115339	0.0832204	1	0.00674468		0.119699	0.0847674	1	1.21121	0.00556855	0.0988256	0.0699857	0.82562	1	-3.34029e-06	0.00025846	-3.95774e-05	0.999782	-6.53049
169	1.17462	0.0913871	0.134507	-0.00512021	0.00315984	1.1763	0.0979371	0.135633	0.000985549	0.0074632	0.00634462	0.115304	0.0832583	1	0.00688179		0.119662	0.084806	1	1.21135	0.00568109	0.098784	0.0700095	0.825525	1	0.00010946	0.000222904	0.000108788	0.999638	2.04898
169.2	1.14223	0.0885193	0.130304	-0.00538148	0.00283586	1.14392	0.0950693	0.13143	0.000724279	0.00713923	0.00624103	0.114895	0.0831085	1	0.00676943		0.119237	0.0846534	1	1.21066	0.00559152	0.0984895	0.0699234	0.825996	1	-0.000330759	-0.000139097	-1.28892e-05	1.00024	10.7918
169.4	1.14611	0.088846	0.131116	-0.00534716	0.00288178	1.1478	0.095396	0.132242	0.000758595	0.00718514	0.00625994	0.115214	0.0831123	1	0.00678994		0.119569	0.0846573	1	1.21102	0.00560682	0.0987342	0.069906	0.825753	1	-0.000327607	0.000145385	9.38395e-06	0.999936	15.4929
169.6	1.13397	0.0881625	0.129968	-0.0053481	0.00283498	1.13566	0.0947125	0.131095	0.000757655	0.00713835	0.00628566	0.115435	0.0833989	1	0.00681784		0.119798	0.0849493	1	1.21157	0.0056273	0.0988787	0.0701153	0.825379	1	0.000532165	0.000341666	3.96012e-05	0.999471	8.62766
169.8	1.17674	0.091799	0.134953	-0.0052875	0.00322595	1.17842	0.098349	0.136079	0.000818256	0.00752931	0.00638931	0.115476	0.0834581	1	0.00693026	0.00685437	0.11984	0.0850096	1	1.21178	0.00571908	0.098896	0.0701526	0.825232	1	0.00070771	0.000374631	0.000161221	0.999267	2.32371			#DIV/0!
170	1.16379	0.0907401	0.133215	-0.00527736	0.0030005	1.16548	0.0972901	0.134341	0.000828397	0.00730386	0.00626681	0.115266	0.0834762	1	0.00679739		0.119623	0.085028	1	1.21145	0.00561096	0.0987436	0.0701871	0.825458	1	0.000770443	0.000191602	1.74491e-05	0.999577	10.9806
170.2	1.13155	0.0879446	0.129291	-0.00535552	0.00294618	1.13324	0.0944946	0.130417	0.000750234	0.00724954	0.00639721	0.115084	0.0833848	1	0.00693883		0.119433	0.0849349	1	1.21131	0.00572838	0.0985986	0.0701184	0.825555	1	0.000496267	2.44172e-05	0.00017048	0.999667	0.143226		0.143226
170.4	1.16031	0.0902243	0.132668	-0.00534482	0.00307623	1.162	0.0967743	0.133795	0.00076094	0.0073796	0.00635075	0.115141	0.0832823	1	0.00688844		0.119493	0.0848305	1	1.21121	0.00568723	0.0986558	0.0700377	0.825619	1	0.000186107	7.74312e-05	0.000115969	0.999755	0.667688
170.6	1.15405	0.08963	0.132196	-0.00536687	0.00296003	1.15574	0.09618	0.133322	0.000738892	0.00726339	0.00628464	0.115357	0.0832196	1	0.00681673		0.119717	0.0847666	1	1.2113	0.00562761	0.0988332	0.0699799	0.825559	1	-7.44682e-06	0.000271834	3.83962e-05	0.999692	7.0797
170.8	1.17458	0.0913734	0.134656	-0.00536915	0.00299297	1.17627	0.0979234	0.135783	0.000736606	0.00729634	0.00620292	0.115435	0.0832488	1	0.0067281		0.119797	0.0847964	1	1.21132	0.00555434	0.098898	0.0700032	0.825544	1	8.05574e-05	0.000343822	-5.75064e-05	0.999691	-5.97884
171	1.20402	0.0937106	0.137679	-0.00524628	0.00348867	1.20571	0.100261	0.138805	0.000859478	0.00779204	0.00646263	0.115124	0.083155	1	0.00700979		0.119475	0.0847008	1	1.21119	0.00578754	0.0986427	0.0699322	0.825638	1	-0.000200451	5.79877e-05	0.000247304	0.99975	0.23448		0.23448
171.2	1.17952	0.092001	0.135224	-0.00531773	0.00327362	1.1812	0.098551	0.136351	0.000788024	0.00757699	0.00641463	0.115434	0.0834327	1	0.00695773		0.119796	0.0849837	1	1.21174	0.00574194	0.0988632	0.0701337	0.825261	1	0.000631504	0.000336123	0.000190932	0.999297	1.76043		1.76043
171.4	1.17672	0.0917383	0.134714	-0.00528103	0.00319239	1.17841	0.0982883	0.13584	0.000824733	0.00749575	0.00636091	0.115274	0.0834076	1	0.00689946		0.119631	0.0849581	1	1.21149	0.00569502	0.098747	0.0701271	0.825431	1	0.000561009	0.000195612	0.000127887	0.99952	1.52957
171.6	1.20131	0.0936843	0.137435	-0.00527921	0.00329036	1.20299	0.100234	0.138561	0.000826549	0.00759372	0.00631235	0.11518	0.0833207	1	0.00684679		0.119533	0.0848696	1	1.21125	0.00565266	0.098686	0.0700678	0.825594	1	0.000301952	0.000113338	7.08953e-05	0.999732	1.59866
171.8	1.19861	0.0932272	0.136936	-0.00557767	0.00315547	1.2003	0.0997772	0.138062	0.000528091	0.00745883	0.00621413	0.115023	0.0831267	1	0.00674025	0.00686235	0.11937	0.084672	1	1.21078	0.00556685	0.0985893	0.0699317	0.825912	1	-0.000278261	-2.38997e-05	-4.4452e-05	1.00015	0.537652			0.712712
172	1.17559	0.091418	0.134572	-0.00532555	0.00307227	1.17728	0.0979681	0.135699	0.000780213	0.00737564	0.00626497	0.115264	0.0832154	1	0.0067954		0.119621	0.0847623	1	1.21118	0.00561057	0.0987639	0.0699834	0.825642	1	-1.73799e-05	0.000189939	1.52937e-05	0.9998	12.4194
172.2	1.1722	0.0911883	0.134228	-0.0052958	0.00297859	1.17389	0.0977383	0.135354	0.000809958	0.00728196	0.00620329	0.115304	0.0832604	1	0.00672849		0.119662	0.0848081	1	1.2112	0.00555523	0.0987964	0.07002	0.825628	1	0.000118755	0.000227589	-5.71117e-05	0.999796	-3.98497
172.4	1.16237	0.0903161	0.13271	-0.00539672	0.00308505	1.16406	0.0968661	0.133836	0.000709043	0.00738841	0.0063471	0.114974	0.083214	1	0.00688448		0.119319	0.0847609	1	1.21096	0.00568513	0.0985321	0.0699945	0.825788	1	-1.60865e-05	-7.22757e-05	0.00011168	0.999965	-0.647169
172.6	1.15218	0.0895602	0.13159	-0.00520183	0.00301883	1.15386	0.0961103	0.132716	0.000903926	0.0073222	0.00634581	0.115019	0.0832942	1	0.00688308		0.119366	0.0848426	1	1.21109	0.00568336	0.0985607	0.0700547	0.825701	1	0.000225341	-3.1628e-05	0.000110151	0.999859	-0.287132
172.8	1.141	0.0888002	0.130302	-0.00522459	0.00290852	1.14269	0.0953503	0.131428	0.000881165	0.00721188	0.00631132	0.115017	0.0834437	1	0.00684567		0.119363	0.0849949	1	1.2112	0.00565196	0.0985494	0.0701739	0.825625	1	0.000677845	-3.27604e-05	6.96602e-05	0.999774	-0.470288
173	1.12274	0.0871512	0.128618	-0.00541202	0.0027455	1.12442	0.0937013	0.129744	0.000693735	0.00704886	0.00626886	0.115387	0.0833326	1	0.00679962		0.119748	0.0848818	1	1.21143	0.00561289	0.0988486	0.0700674	0.825471	1	0.000333584	0.00029943	1.98834e-05	0.999588	15.0593
173.2	1.14411	0.0889529	0.131227	-0.00540647	0.00308684	1.1458	0.0955029	0.132353	0.000699287	0.00739021	0.00644981	0.115512	0.0833503	1	0.00699588		0.119877	0.0848997	1	1.21177	0.00577326	0.0989272	0.0700624	0.825237	1	0.00037974	0.000404583	0.000232216	0.999258	1.74228		1.74228
173.4	1.16949	0.0910079	0.134006	-0.00545614	0.00309223	1.17117	0.0975579	0.135132	0.000649622	0.0073956	0.00631469	0.115382	0.0832992	1	0.00684932		0.119743	0.0848477	1	1.21144	0.00565387	0.0988433	0.0700388	0.825464	1	0.000231835	0.000293277	7.36642e-05	0.999569	3.98127
173.6	1.13747	0.088263	0.130302	-0.00518078	0.00295842	1.13916	0.094813	0.131428	0.000924981	0.00726178	0.00637467	0.115372	0.0832304	1	0.00691438		0.119733	0.0847776	1	1.21142	0.00570764	0.0988363	0.0699817	0.825474	1	2.28782e-05	0.000282831	0.000144063	0.999567	1.96324
173.8	1.16806	0.0908188	0.133978	-0.0055283	0.00323925	1.16975	0.0973688	0.135104	0.000577458	0.00754262	0.00644805	0.115498	0.0832389	1	0.00699398	0.00686903	0.119863	0.0847863	1	1.21164	0.00577231	0.0989262	0.0699763	0.825325	1	4.38795e-05	0.000392651	0.000230181	0.999365	1.70583		1.70583	1.72405
174	1.16991	0.091023	0.133834	-0.0052514	0.00310684	1.1716	0.097573	0.134961	0.000854356	0.00741021	0.00632489	0.115194	0.0832821	1	0.00686038		0.119547	0.0848303	1	1.21124	0.00566394	0.0986986	0.070036	0.825601	1	0.000184734	0.000125087	8.56138e-05	0.999738	1.46106
174.2	1.16029	0.0901079	0.132552	-0.00547426	0.00301787	1.16198	0.0966579	0.133679	0.000631494	0.00732124	0.00630066	0.115044	0.0831838	1	0.00683411		0.119392	0.0847302	1	1.21096	0.00564356	0.0985931	0.0699696	0.825794	1	-0.000108023	-7.9668e-06	5.71624e-05	0.999981	-0.139371
174.4	1.1511	0.0893982	0.131497	-0.00537454	0.00293739	1.15279	0.0959482	0.132624	0.000731217	0.00724075	0.00628107	0.115046	0.0832313	1	0.00681286		0.119394	0.0847785	1	1.21099	0.00562588	0.0985925	0.0700079	0.825774	1	3.59053e-05	-5.51809e-06	3.41593e-05	0.999961	-0.16154
174.6	1.15308	0.0895673	0.131983	-0.00537645	0.00315566	1.15477	0.0961173	0.13311	0.000729306	0.00745902	0.00645933	0.11527	0.0832352	1	0.00700621		0.119626	0.0847825	1	1.21141	0.00578349	0.0987492	0.0699863	0.825481	1	3.81288e-05	0.000188472	0.000243413	0.999557	0.774289		0.774289
174.8	1.15603	0.0899325	0.132334	-0.00536253	0.00290326	1.15772	0.0964825	0.13346	0.000743232	0.00720663	0.00622487	0.115279	0.0833386	1	0.0067519		0.119636	0.0848879	1	1.21128	0.0055742	0.0987684	0.0700814	0.825576	1	0.000355445	0.000204128	-3.17804e-05	0.999729	-6.42309
175	1.19474	0.0933248	0.136956	-0.00535373	0.00337147	1.19643	0.0998748	0.138082	0.000752027	0.00767484	0.0064148	0.115412	0.0834775	1	0.00695791		0.119774	0.0850293	1	1.21176	0.00574198	0.098843	0.07017	0.825245	1	0.000767349	0.000317047	0.000191118	0.999278	1.65891		1.65891
175.2	1.20064	0.0936877	0.137278	-0.00543644	0.00328018	1.20233	0.100238	0.138404	0.000669321	0.00758354	0.00630736	0.115113	0.0833695	1	0.00684138		0.119464	0.0849193	1	1.21122	0.00564832	0.0986304	0.0701103	0.825611	1	0.000451081	5.34072e-05	6.50309e-05	0.999756	0.821258
175.4	1.19649	0.0931672	0.136716	-0.0054411	0.00339531	1.19818	0.0997173	0.137842	0.000664663	0.00769867	0.00642533	0.115043	0.0832242	1	0.00696933		0.119391	0.0847713	1	1.21113	0.00575439	0.0985781	0.0699934	0.825674	1	1.13822e-05	-1.26498e-05	0.000203508	0.999806	-0.0621588		-0.0621588
175.6	1.19757	0.0936344	0.137068	-0.00555734	0.00321406	1.19926	0.100184	0.138194	0.000548417	0.00751742	0.0062684	0.115233	0.0835387	1	0.00679911		0.119589	0.0850917	1	1.21148	0.00561224	0.0987128	0.0702378	0.825437	1	0.000960152	0.000162147	1.93066e-05	0.999551	8.39854
175.8	1.22939	0.0958177	0.140628	-0.00538512	0.00358139	1.23108	0.102368	0.141754	0.000720639	0.00788476	0.00640476	0.115146	0.0831529	1	0.00694702	0.00687802	0.119498	0.0846986	1	1.21114	0.00573592	0.0986657	0.0699328	0.825666	1	-0.000206346	8.02869e-05	0.00017938	0.999798	0.447581		0.447581	0.704654
176	1.15595	0.0898335	0.132019	-0.00535883	0.00304418	1.15764	0.0963836	0.133145	0.000746928	0.00734754	0.00634699	0.115014	0.0832585	1	0.00688436		0.119361	0.0848063	1	1.21105	0.00568462	0.0985596	0.070027	0.825729	1	0.000117627	-3.62381e-05	0.00011155	0.999892	-0.324861
176.2	1.16135	0.0902074	0.133054	-0.00545485	0.00289971	1.16304	0.0967574	0.13418	0.000650909	0.00720308	0.00619333	0.11537	0.0831937	1	0.00671769		0.119731	0.0847403	1	1.21119	0.00554636	0.0988538	0.0699645	0.825635	1	-8.41164e-05	0.000286821	-6.87855e-05	0.999805	-4.16979
176.4	1.11633	0.0866613	0.127731	-0.00532385	0.00290196	1.11802	0.0932114	0.128858	0.000781907	0.00720533	0.00644474	0.115256	0.0833721	1	0.00699039		0.119612	0.0849219	1	1.21152	0.00576991	0.0987282	0.0700951	0.825407	1	0.000452366	0.000176369	0.000226267	0.999471	0.779471		0.779471
176.6	1.11417	0.086532	0.127691	-0.00533644	0.0027529	1.11586	0.0930821	0.128817	0.000769323	0.00705627	0.00632361	0.115442	0.0834172	1	0.006859		0.119805	0.0849679	1	1.21163	0.00566096	0.0988791	0.0701268	0.825333	1	0.000586473	0.000346625	8.41313e-05	0.999406	4.12004
176.8	1.08991	0.0842871	0.124512	-0.00549464	0.00270331	1.0916	0.0908371	0.125639	0.000611123	0.00700667	0.00641871	0.115096	0.0832145	1	0.00696215		0.119446	0.0847614	1	1.21117	0.00574829	0.0986202	0.0699831	0.825648	1	-1.9089e-05	3.46046e-05	0.000195743	0.999775	0.176785		0.176785
177	1.10896	0.0858354	0.127221	-0.00542494	0.00253988	1.11065	0.0923854	0.128347	0.000680821	0.00684324	0.00616149	0.115561	0.0831816	1	0.00668316		0.119928	0.0847279	1	1.21134	0.00551716	0.0990049	0.0699456	0.825532	1	-0.000124844	0.000457994	-0.00010611	0.999683	-4.31621
177.2	1.14132	0.0888349	0.130921	-0.00545842	0.00304359	1.14301	0.0953849	0.132047	0.000647336	0.00734695	0.00642771	0.115525	0.0834504	1	0.00697191		0.119892	0.0850017	1	1.21187	0.00575304	0.0989314	0.0701412	0.825174	1	0.000682361	0.000417495	0.000206274	0.999186	2.02399		2.02399
177.4	1.16254	0.0903413	0.132932	-0.00531119	0.00321039	1.16423	0.0968913	0.134058	0.000794574	0.00751375	0.00645383	0.115147	0.0832234	1	0.00700025		0.119499	0.0847705	1	1.21127	0.00577926	0.098656	0.0699848	0.82558	1	5.76112e-06	7.93238e-05	0.000236965	0.999682	0.334749		0.334749
177.6	1.15763	0.0901968	0.132316	-0.00537886	0.00285421	1.15932	0.0967468	0.133442	0.000726899	0.00715758	0.00617397	0.115104	0.0834517	1	0.00669669		0.119454	0.085003	1	1.21115	0.00552918	0.0986285	0.0701835	0.825659	1	0.000702575	4.97351e-05	-9.1568e-05	0.999846	-0.543149
177.8	1.17202	0.0918853	0.134217	-0.00545265	0.00309599	1.1737	0.0984353	0.135343	0.000653108	0.00739935	0.00630427	0.115313	0.0838672	1	0.00683803	0.00686036	0.119671	0.0854263	1	1.21194	0.00564224	0.0987437	0.0704875	0.825127	1	0.00194897	0.00023183	6.1402e-05	0.999164	3.77561			0.828748
178	1.18501	0.0921891	0.13557	-0.0054995	0.00337758	1.1867	0.0987391	0.136696	0.000606263	0.00768094	0.00647252	0.11519	0.0832048	1	0.00702052		0.119543	0.0847516	1	1.21132	0.00579578	0.098689	0.0699666	0.825549	1	-5.17944e-05	0.000116915	0.000258908	0.999639	0.451571		0.451571
178.2	1.20651	0.0940084	0.138013	-0.00528474	0.00323231	1.2082	0.100558	0.139139	0.000821021	0.00753568	0.00623712	0.115163	0.0832301	1	0.00676519		0.119515	0.0847774	1	1.21106	0.00558618	0.0986867	0.0700027	0.825724	1	3.03229e-05	0.000100252	-1.74199e-05	0.999909	-5.75505
178.4	1.197	0.0933472	0.136989	-0.00517158	0.00355779	1.19869	0.0998972	0.138115	0.000934176	0.00786116	0.00655812	0.115221	0.0833386	1	0.00711337		0.119576	0.0848878	1	1.21158	0.00587116	0.0986946	0.0700639	0.82537	1	0.000349654	0.000142269	0.000359311	0.999401	0.395948		0.395948
178.6	1.16395	0.0899976	0.132649	-0.00542944	0.00292175	1.16564	0.0965476	0.133775	0.000676317	0.00722511	0.0061984	0.114765	0.0828278	1	0.00672319		0.119102	0.0843675	1	1.21019	0.00555546	0.0984161	0.0697141	0.826314	1	-0.00117565	-0.000253895	-6.30065e-05	1.00064	4.02967
178.8	1.16206	0.0904687	0.13313	-0.00530955	0.00299974	1.16375	0.0970187	0.134256	0.000796213	0.00730311	0.00627551	0.115365	0.0833676	1	0.00680683		0.119725	0.0849173	1	1.21145	0.00561875	0.0988283	0.0700956	0.825457	1	0.000439485	0.00027969	2.76828e-05	0.99957	10.1034
179	1.17053	0.0910701	0.133988	-0.00558719	0.00319205	1.17222	0.0976201	0.135114	0.000518564	0.00749542	0.0063942	0.115263	0.083278	1	0.00693557		0.11962	0.0848261	1	1.21138	0.00572534	0.0987464	0.0700242	0.825504	1	0.00016891	0.000184844	0.00016698	0.999601	1.10699
179.2	1.19881	0.0936479	0.137618	-0.00529717	0.00341732	1.2005	0.100198	0.138744	0.000808594	0.00772069	0.00643123	0.115572	0.0834636	1	0.00697573		0.11994	0.0850151	1	1.21193	0.00575588	0.0989662	0.0701485	0.825129	1	0.000720716	0.000459272	0.000210402	0.99913	2.18283		2.18283
179.4	1.16824	0.0907143	0.133533	-0.00541029	0.00313904	1.16993	0.0972643	0.134659	0.00069547	0.00744241	0.00636142	0.1151	0.083137	1	0.00690002		0.11945	0.0846825	1	1.21103	0.00569763	0.0986352	0.0699258	0.825741	1	-0.000252234	4.04739e-05	0.000128508	0.999901	0.314953
179.6	1.13924	0.088628	0.130563	-0.00531474	0.00279272	1.14093	0.095178	0.131689	0.000791023	0.00709608	0.00621955	0.115422	0.0834213	1	0.00674613		0.119785	0.0849721	1	1.2115	0.0055684	0.0988728	0.0701378	0.825421	1	0.000601691	0.000332435	-3.79836e-05	0.999538	-8.75205
179.8	1.15768	0.0898045	0.13241	-0.00519855	0.00281214	1.15937	0.0963545	0.133536	0.000907205	0.00711551	0.00613741	0.11518	0.0831096	1	0.00665703	0.00686436	0.119533	0.0846546	1	1.21085	0.00549784	0.098719	0.0699136	0.825869	1	-0.000332377	0.000119026	-0.00013451	1.00011	-0.88489			1.01012
180	1.1527	0.0897676	0.131685	-0.00531029	0.00296377	1.15438	0.0963176	0.132811	0.000795468	0.00726713	0.00629524	0.115049	0.0834363	1	0.00682823		0.119397	0.0849874	1	1.21121	0.00563752	0.0985766	0.0701672	0.825619	1	0.000655036	-3.1843e-06	5.0792e-05	0.99977	-0.0626931
180.2	1.15207	0.089491	0.131716	-0.0054523	0.00296816	1.15376	0.096041	0.132842	0.000653457	0.00727153	0.00630249	0.115139	0.0832421	1	0.00683609		0.119491	0.0847895	1	1.21112	0.00564445	0.0986616	0.0700094	0.825685	1	6.55867e-05	7.68781e-05	5.93164e-05	0.999846	1.29607
180.4	1.17947	0.091873	0.13517	-0.00545766	0.00328915	1.18115	0.098423	0.136297	0.000648099	0.00759252	0.00642805	0.115393	0.0833278	1	0.00697228		0.119754	0.0848768	1	1.2116	0.00575459	0.0988392	0.0700533	0.825353	1	0.000315453	0.000299206	0.000206692	0.999406	1.4476		1.4476
180.6	1.17937	0.0917854	0.134843	-0.00534692	0.00297472	1.18106	0.0983354	0.135969	0.000758835	0.00727809	0.00616235	0.115125	0.0832605	1	0.00668409		0.119476	0.0848083	1	1.21097	0.00551962	0.0986614	0.0700335	0.825786	1	0.000124632	6.85779e-05	-0.000105219	1	-0.651763
180.8	1.21528	0.0951032	0.139488	-0.00537596	0.00315363	1.21697	0.101653	0.140614	0.000729803	0.007457	0.00612749	0.115544	0.0835295	1	0.00664628		0.119911	0.0850823	1	1.21164	0.00548536	0.0989659	0.0702208	0.825328	1	0.000927297	0.00044397	-0.00014599	0.999444	-3.0411
181	1.19684	0.0933132	0.136552	-0.00539832	0.00331525	1.19853	0.0998632	0.137678	0.000707435	0.00761862	0.00635661	0.114872	0.0833212	1	0.0068948		0.119213	0.0848701	1	1.21098	0.00569358	0.0984439	0.0700839	0.825779	1	0.000310304	-0.000163304	0.000122824	0.999954	-1.32957
181.2	1.15377	0.0896956	0.131846	-0.00544251	0.00301884	1.15546	0.0962456	0.132972	0.000663254	0.00732221	0.00633707	0.115082	0.0832966	1	0.0068736		0.119431	0.0848451	1	1.21115	0.00567527	0.0986099	0.0700533	0.825662	1	0.00023112	2.48152e-05	9.99038e-05	0.999811	0.248391
181.4	1.16881	0.0907948	0.133538	-0.00539108	0.0032841	1.1705	0.0973448	0.134664	0.000714681	0.00758747	0.00648227	0.115048	0.0831654	1	0.00703109		0.119397	0.0847114	1	1.21114	0.00580535	0.0985821	0.0699436	0.825669	1	-0.000167535	-9.74344e-06	0.000270355	0.999786	-0.0360394		-0.0360394
181.6	1.19653	0.093181	0.137024	-0.00538985	0.00325644	1.19821	0.099731	0.138151	0.000715909	0.00755981	0.00630923	0.115297	0.083233	1	0.0068434		0.119655	0.0847803	1	1.21128	0.00564973	0.0987838	0.0699924	0.825574	1	3.40814e-05	0.000217779	6.72489e-05	0.999705	3.2384
181.8	1.20276	0.0937082	0.137617	-0.00530295	0.00321535	1.20445	0.100258	0.138744	0.000802808	0.00751872	0.00624245	0.115193	0.0832399	1	0.00677097	0.00683808	0.119546	0.0847872	1	1.2111	0.00559074	0.0987084	0.0700082	0.825693	1	5.8778e-05	0.000126563	-1.1157e-05	0.999868	-11.3438			0.705778
182	1.17851	0.0916175	0.134713	-0.00546473	0.00330989	1.1802	0.0981675	0.135839	0.000641025	0.00761326	0.00645081	0.115098	0.0831785	1	0.00699697		0.119448	0.0847248	1	1.21117	0.00577703	0.0986223	0.0699528	0.825648	1	-0.000128537	3.57693e-05	0.000233425	0.999767	0.153237		0.153237
182.2	1.16337	0.0904111	0.133045	-0.00537173	0.00317338	1.16506	0.0969612	0.134171	0.000734031	0.00747675	0.00641748	0.115163	0.0832242	1	0.00696082		0.119515	0.0847713	1	1.21125	0.00574682	0.098671	0.0699868	0.825595	1	8.60059e-06	9.41687e-05	0.000194304	0.999709	0.484646		0.484646
182.4	1.17298	0.0914374	0.134265	-0.00537346	0.00325612	1.17467	0.0979874	0.135391	0.000732297	0.00755948	0.00643541	0.115259	0.083417	1	0.00698027		0.119615	0.0849677	1	1.21156	0.00576137	0.098728	0.0701306	0.82538	1	0.000588223	0.000179794	0.000215314	0.999441	0.83503		0.83503
182.6	1.1496	0.0894004	0.131569	-0.00537197	0.0027602	1.15129	0.0959504	0.132696	0.000733792	0.00706357	0.00613534	0.115258	0.0833415	1	0.00665479		0.119614	0.0848907	1	1.21116	0.00549456	0.0987599	0.0700905	0.825655	1	0.000366439	0.000188358	-0.00013689	0.999847	-1.37598
182.8	1.15576	0.089677	0.132321	-0.00527103	0.00324204	1.15745	0.096227	0.133447	0.000834734	0.00754541	0.006519	0.115294	0.0831372	1	0.00707093		0.119652	0.0846827	1	1.21141	0.00583697	0.0987709	0.0699045	0.825488	1	-0.00025974	0.00020844	0.000313456	0.99955	0.664975		0.664975
183	1.191	0.0925217	0.136231	-0.00544421	0.00325558	1.19269	0.0990717	0.137357	0.000661547	0.00755894	0.00633772	0.115166	0.0830656	1	0.0068743		0.119518	0.0846098	1	1.211	0.00567654	0.0986938	0.0698676	0.825762	1	-0.000469099	9.96763e-05	0.00010069	0.99993	0.989933
183.2	1.20313	0.0939333	0.137673	-0.00554192	0.00330096	1.20482	0.100483	0.138799	0.000563839	0.00760433	0.00631158	0.115203	0.083401	1	0.00684596		0.119557	0.0849514	1	1.21135	0.00565149	0.0986969	0.0701293	0.825522	1	0.000543928	0.000133553	6.99927e-05	0.999645	1.90809
183.4	1.16367	0.09042	0.132413	-0.0053422	0.00317381	1.16536	0.0969701	0.133539	0.00076356	0.00747718	0.00641619	0.11459	0.0832103	1	0.00695942		0.118921	0.0847572	1	1.21064	0.00574856	0.0982301	0.0700104	0.826011	1	-1.87305e-05	-0.000416825	0.000192779	1.00023	-2.16219		-2.16219
183.6	1.19566	0.0934135	0.137155	-0.00549411	0.00341708	1.19735	0.0999636	0.138281	0.000611652	0.00772044	0.00644793	0.115489	0.0834872	1	0.00699385		0.119854	0.0850392	1	1.21189	0.00577104	0.0988988	0.0701709	0.825159	1	0.00079399	0.000384779	0.00022999	0.999164	1.67302		1.67302
183.8	1.17152	0.0911482	0.134115	-0.00521206	0.00312616	1.17321	0.0976982	0.135242	0.0008937	0.00742953	0.00633263	0.115274	0.083274	1	0.00686878	0.00692061	0.119631	0.084822	1	1.21132	0.00567048	0.0987608	0.0700244	0.825544	1	0.00015804	0.000196819	9.4711e-05	0.999664	2.0781			0.274787
184	1.17878	0.0917168	0.134904	-0.00524893	0.00310586	1.18047	0.0982668	0.136031	0.000856831	0.00740923	0.00627652	0.115234	0.0832439	1	0.00680792		0.11959	0.0847914	1	1.21119	0.00562086	0.0987374	0.0700067	0.825635	1	6.92171e-05	0.000162849	2.88423e-05	0.999789	5.6462
184.2	1.18766	0.0925898	0.136151	-0.00544682	0.00324043	1.18935	0.0991398	0.137278	0.000658936	0.0075438	0.00634279	0.115422	0.0833563	1	0.0068798		0.119785	0.0849058	1	1.21157	0.00567842	0.0988673	0.0700792	0.825375	1	0.000402485	0.000328454	0.000106642	0.999453	3.07998
184.4	1.19273	0.0930364	0.136126	-0.00528392	0.00326706	1.19442	0.0995864	0.137252	0.000821838	0.00757042	0.00633817	0.114911	0.0833765	1	0.0068748		0.119254	0.0849265	1	1.21106	0.0056767	0.0984714	0.070126	0.825726	1	0.000476994	-0.000127488	0.000101172	0.999894	-1.26011
184.6	1.1983	0.093173	0.136967	-0.00546693	0.00338381	1.19998	0.099723	0.138093	0.000638827	0.00768718	0.00640607	0.115079	0.0831036	1	0.00694844		0.119429	0.0846485	1	1.21103	0.00573765	0.0986177	0.0698982	0.825746	1	-0.000353486	2.01937e-05	0.000180926	0.999897	0.111613		0.111613
184.8	1.17734	0.0914314	0.134379	-0.00535768	0.00304752	1.17902	0.0979815	0.135506	0.000748075	0.00735088	0.00623471	0.11493	0.0831038	1	0.00676258		0.119274	0.0846487	1	1.21069	0.00558574	0.0985178	0.069918	0.825978	1	-0.000345561	-0.000107307	-2.02966e-05	1.00022	5.28695
185	1.17941	0.0918934	0.135074	-0.00525745	0.00312732	1.1811	0.0984434	0.136201	0.000848308	0.00743069	0.00629134	0.115317	0.0833491	1	0.006824		0.119675	0.0848985	1	1.2114	0.00563316	0.0987911	0.0700831	0.825493	1	0.000384558	0.000236043	4.62508e-05	0.999611	5.10354
185.2	1.16944	0.0911164	0.133752	-0.00541988	0.00292385	1.17113	0.0976665	0.134878	0.00068588	0.00722722	0.00617116	0.11517	0.0833952	1	0.00669365		0.119522	0.0849455	1	1.21116	0.00552664	0.098684	0.0701356	0.825654	1	0.0005304	0.000108286	-9.48489e-05	0.999839	-1.14166
185.4	1.20229	0.0937707	0.137726	-0.00533775	0.00334119	1.20398	0.100321	0.138852	0.000768008	0.00764456	0.00634942	0.115328	0.0833244	1	0.006887		0.119687	0.0848734	1	1.21145	0.00568493	0.0987966	0.0700595	0.825459	1	0.000308545	0.000244149	0.000114419	0.999556	2.13382
185.6	1.1803	0.0917398	0.134797	-0.00527847	0.00305512	1.18199	0.0982898	0.135924	0.000827286	0.00735848	0.00622553	0.114996	0.0831565	1	0.00675261		0.119342	0.0847023	1	1.2108	0.005577	0.098565	0.0699559	0.825902	1	-0.000187808	-4.83825e-05	-3.10718e-05	1.00013	1.55712
185.8	1.20528	0.09411	0.137901	-0.00529947	0.00333476	1.20697	0.10066	0.139027	0.00080629	0.00763812	0.00632832	0.115187	0.0833987	1	0.00686412	0.00682949	0.11954	0.084949	1	1.21135	0.00566649	0.098683	0.0701274	0.825523	1	0.000536959	0.000118511	8.96413e-05	0.999642	1.32206			0.111613
186	1.19512	0.0928602	0.1366	-0.0054153	0.00323841	1.19681	0.0994102	0.137726	0.000690455	0.00754178	0.00630159	0.115078	0.083063	1	0.00683512		0.119427	0.0846071	1	1.21087	0.0056448	0.0986295	0.069873	0.825853	1	-0.000474199	2.25791e-05	5.82632e-05	1.00005	0.387537
186.2	1.17267	0.0916023	0.13413	-0.00528504	0.00313582	1.17436	0.0981523	0.135257	0.000820723	0.00743918	0.00633466	0.115175	0.0835793	1	0.00687099		0.119528	0.085133	1	1.21153	0.00567132	0.0986582	0.0702689	0.825402	1	0.00108267	0.00010755	9.70604e-05	0.999494	1.10807
186.4	1.17619	0.0914797	0.134557	-0.00524007	0.00325406	1.17788	0.0980297	0.135683	0.000865689	0.00755743	0.00641612	0.115193	0.0832254	1	0.00695934		0.119546	0.0847726	1	1.21128	0.00574546	0.0986943	0.069986	0.825574	1	1.15802e-05	0.000121103	0.000192707	0.999683	0.628429		0.628429
186.6	1.16359	0.0905039	0.132894	-0.00536937	0.00308086	1.16528	0.0970539	0.134021	0.000736394	0.00738423	0.00633688	0.115012	0.0832882	1	0.00687339		0.119359	0.0848365	1	1.21107	0.00567548	0.0985564	0.0700509	0.825717	1	0.000207483	-3.78004e-05	9.96728e-05	0.99988	-0.379245
186.8	1.16143	0.0903439	0.133161	-0.00537698	0.00312732	1.16312	0.0968939	0.134287	0.000728778	0.00743068	0.00638856	0.115454	0.0833049	1	0.00692945		0.119817	0.0848535	1	1.2116	0.00571925	0.0988919	0.0700342	0.825355	1	0.000245467	0.000355131	0.00016036	0.999416	2.21459
187	1.15708	0.0898818	0.13235	-0.00530969	0.00295434	1.15877	0.0964319	0.133476	0.000796064	0.00725771	0.00626327	0.115188	0.0832189	1	0.00679355		0.119541	0.0847659	1	1.2111	0.0056094	0.0987044	0.0699908	0.825695	1	-4.84524e-06	0.000121456	1.32805e-05	0.999867	9.14543
187.2	1.16535	0.0906553	0.133212	-0.00527493	0.00318946	1.16704	0.0972053	0.134338	0.000830832	0.00749282	0.00642037	0.11511	0.0832923	1	0.00696396		0.119461	0.0848406	1	1.21127	0.00574932	0.0986248	0.070043	0.825583	1	0.000215472	4.74877e-05	0.000197685	0.999695	0.240219		0.240219
187.4	1.19346	0.0931923	0.136771	-0.00549854	0.00320032	1.19515	0.0997423	0.137897	0.00060722	0.00750368	0.00627846	0.115381	0.083456	1	0.00681003		0.119742	0.0850074	1	1.21156	0.00562088	0.0988329	0.0701637	0.825383	1	0.00070627	0.000293694	3.11394e-05	0.999479	9.4316
187.6	1.17431	0.0915459	0.134213	-0.00526639	0.00325331	1.176	0.0980959	0.135339	0.000839374	0.00755668	0.00642576	0.115084	0.083415	1	0.00696979		0.119434	0.0849656	1	1.21137	0.00575365	0.0985942	0.0701401	0.825512	1	0.000586741	2.42468e-05	0.00020398	0.999608	0.118868		0.118868
187.8	1.16696	0.0907828	0.133527	-0.00544577	0.00325773	1.16865	0.0973328	0.134654	0.000659993	0.0075611	0.00646994	0.115222	0.0832865	1	0.00701772	0.00690233	0.119576	0.0848348	1	1.21143	0.00579293	0.0987068	0.0700287	0.825472	1	0.000194236	0.000145141	0.000255852	0.999545	0.567286		0.567286	0.388701
188	1.2107	0.094292	0.138581	-0.00542532	0.00331352	1.21238	0.100842	0.139707	0.000680437	0.00761689	0.00628257	0.115233	0.0831766	1	0.00681448		0.119589	0.0847228	1	1.21113	0.00562657	0.0987417	0.0699538	0.825678	1	-0.000134236	0.000161839	3.59461e-05	0.99984	4.50227
188.2	1.16974	0.090681	0.13338	-0.00519432	0.00299104	1.17143	0.097231	0.134506	0.000911434	0.00729441	0.00622695	0.114823	0.0830022	1	0.00675415		0.119162	0.0845452	1	1.21046	0.00557982	0.0984437	0.0698454	0.826131	1	-0.000650056	-0.00020328	-2.94444e-05	1.00041	6.90388
188.4	1.15409	0.0899388	0.132023	-0.00528854	0.00324247	1.15578	0.0964888	0.133149	0.000817221	0.00754584	0.00652877	0.115203	0.0834836	1	0.00708153		0.119557	0.0850355	1	1.21167	0.00584442	0.0986708	0.0701802	0.825305	1	0.000788613	0.000126612	0.000324836	0.999329	0.389771		0.389771
188.6	1.1777	0.0918163	0.134892	-0.00541272	0.00305811	1.17939	0.0983663	0.136018	0.000693035	0.00736148	0.00624177	0.11533	0.0834044	1	0.00677023		0.119688	0.0849548	1	1.21141	0.0055887	0.0988006	0.0701287	0.825482	1	0.000552401	0.000248869	-1.19276e-05	0.999609	-20.865
188.8	1.17859	0.0918152	0.134802	-0.00533799	0.00322069	1.18028	0.0983652	0.135928	0.000767773	0.00752406	0.00637481	0.115166	0.0833406	1	0.00691454		0.119518	0.0848899	1	1.21132	0.00570825	0.0986677	0.0700803	0.825544	1	0.000361098	9.84946e-05	0.000144206	0.999657	0.683013
189	1.15102	0.0894704	0.131397	-0.00534995	0.00298042	1.15271	0.0960204	0.132524	0.000755808	0.00728379	0.00631883	0.114967	0.0832996	1	0.00685381		0.119312	0.0848481	1	1.21101	0.00565957	0.0985224	0.0700637	0.825754	1	0.000243525	-7.73069e-05	7.84742e-05	0.999931	-0.985125
189.2	1.20012	0.0935138	0.137288	-0.00538845	0.00345936	1.2018	0.100064	0.138415	0.000717314	0.00776273	0.00645923	0.115172	0.0832613	1	0.0070061		0.119525	0.0848091	1	1.21134	0.00578376	0.0986719	0.0700126	0.825532	1	0.000119544	0.000101633	0.000243292	0.999622	0.41774		0.41774
189.4	1.23669	0.0964842	0.141651	-0.00520518	0.00354437	1.23838	0.103034	0.142777	0.000900584	0.00784774	0.0063371	0.115293	0.0832007	1	0.00687363		0.119651	0.0847474	1	1.21127	0.00567472	0.0987812	0.0699656	0.825578	1	-6.39803e-05	0.000213629	9.99629e-05	0.999704	2.13709
189.6	1.17042	0.09074	0.133477	-0.00547775	0.00334026	1.17211	0.09729	0.134603	0.000628004	0.00764363	0.00652128	0.114839	0.0830045	1	0.00707341		0.119179	0.0845475	1	1.2108	0.00584193	0.0984301	0.0698278	0.8259	1	-0.000649603	-0.000198044	0.000316205	1.00006	-0.626316		-0.626316
189.8	1.17731	0.0918121	0.134548	-0.00536516	0.00310544	1.179	0.0983621	0.135675	0.000740599	0.00740881	0.00628397	0.115076	0.0834283	1	0.006816	0.00689579	0.119425	0.0849792	1	1.21122	0.00562739	0.098599	0.07016	0.825614	1	0.000630334	2.11299e-05	3.75602e-05	0.999766	0.562561			0.060398
190	1.18097	0.0917581	0.135052	-0.005397	0.00327488	1.18266	0.0983081	0.136179	0.000708754	0.00757825	0.0064078	0.115146	0.0831245	1	0.00695031		0.119498	0.0846698	1	1.21112	0.00573876	0.0986675	0.0699104	0.825683	1	-0.000292045	7.98618e-05	0.00018295	0.999818	0.436524		0.436524
190.2	1.14977	0.0893365	0.131455	-0.00528562	0.00289928	1.15146	0.0958865	0.132581	0.000820135	0.00720265	0.00625522	0.115141	0.0832738	1	0.00678482		0.119493	0.0848218	1	1.2111	0.0056022	0.098665	0.070037	0.825696	1	0.000162254	8.05816e-05	3.82836e-06	0.99987	21.0486
190.4	1.17183	0.0913693	0.134259	-0.00501321	0.00311037	1.17352	0.0979193	0.135385	0.00109255	0.00741373	0.00631753	0.115367	0.0834408	1	0.0068524		0.119727	0.0849919	1	1.21157	0.0056558	0.0988198	0.0701501	0.825374	1	0.000659724	0.00027988	7.69859e-05	0.99946	3.63547
190.6	1.17995	0.0919365	0.134935	-0.00519458	0.00301743	1.18164	0.0984865	0.136061	0.000911176	0.0073208	0.00619546	0.115146	0.0833473	1	0.00672		0.119498	0.0848967	1	1.21111	0.0055486	0.0986679	0.070098	0.825685	1	0.000385794	8.68411e-05	-6.63367e-05	0.999872	-1.3091
190.8	1.14109	0.0885093	0.130359	-0.00540256	0.00297451	1.14278	0.0950593	0.131485	0.000703203	0.00727788	0.00636857	0.115057	0.0831826	1	0.00690777		0.119406	0.0847289	1	1.21104	0.00570399	0.0985976	0.0699636	0.825735	1	-0.000113568	1.93089e-06	0.000136895	0.999893	0.0141049
191	1.13498	0.0882539	0.129845	-0.00535871	0.00291494	1.13667	0.0948039	0.130971	0.000747045	0.00721831	0.00635039	0.115223	0.0834049	1	0.00688805		0.119578	0.0849553	1	1.21142	0.00568592	0.098709	0.0701286	0.825476	1	0.000554223	0.000150661	0.00011554	0.99958	1.30397
191.2	1.14494	0.0888602	0.131363	-0.00538959	0.00283865	1.14663	0.0954102	0.132489	0.000716171	0.00714202	0.0062287	0.115547	0.0832093	1	0.00675606		0.119914	0.0847561	1	1.21143	0.00557695	0.0989857	0.0699639	0.825473	1	-4.23963e-05	0.000443183	-2.72228e-05	0.999596	-16.2799
191.4	1.18652	0.0923565	0.135909	-0.00528903	0.00329794	1.18821	0.0989066	0.137036	0.000816733	0.0076013	0.00639727	0.115329	0.0832399	1	0.00693889		0.119688	0.0847873	1	1.21141	0.00572793	0.0988003	0.0699903	0.825481	1	5.22432e-05	0.000243739	0.000170583	0.999571	1.42886		1.42886
191.6	1.15897	0.0903027	0.132461	-0.00523218	0.00301497	1.16066	0.0968527	0.133587	0.000873576	0.00731833	0.00630532	0.115096	0.0834462	1	0.00683916		0.119446	0.0849974	1	1.21128	0.00564621	0.0986109	0.0701714	0.825571	1	0.000683392	3.81421e-05	6.26197e-05	0.999709	0.609107
191.8	1.15505	0.0898455	0.132159	-0.0052671	0.00303181	1.15674	0.0963955	0.133285	0.000838655	0.00733518	0.00634126	0.115225	0.0833338	1	0.00687814	0.00685156	0.11958	0.084883	1	1.21134	0.00567812	0.0987168	0.0700736	0.825532	1	0.000339874	0.000152206	0.000104828	0.999648	1.45196			0.932691
192	1.19058	0.0926856	0.136357	-0.00530006	0.00336986	1.19227	0.0992356	0.137483	0.000805703	0.00767323	0.00643583	0.115312	0.0832327	1	0.00698072		0.119671	0.08478	1	1.21143	0.00576238	0.0987844	0.0699833	0.82547	1	3.00372e-05	0.000227314	0.000215837	0.999548	1.05318		1.05318
192.2	1.17939	0.0920578	0.134756	-0.00478444	0.00326524	1.18108	0.0986079	0.135882	0.00132132	0.00756861	0.0064082	0.115049	0.0834895	1	0.00695076		0.119397	0.0850416	1	1.21139	0.00573784	0.0985623	0.0702017	0.825498	1	0.000813304	-6.67643e-06	0.00018337	0.999597	-0.0364097		-0.0364097
192.4	1.18135	0.0925235	0.135142	-0.00367266	0.00325624	1.18304	0.0990735	0.136268	0.00243309	0.0075596	0.00638999	0.115185	0.083745	1	0.00693101		0.119538	0.0853018	1	1.21177	0.00571973	0.0986475	0.0703943	0.825238	1	0.00158173	0.000114923	0.000161971	0.999283	0.709532
192.6	1.17001	0.091104	0.134045	-0.00496472	0.00300285	1.1717	0.097654	0.135171	0.00114104	0.00730622	0.00623557	0.115363	0.0833438	1	0.00676351		0.119723	0.0848931	1	1.21138	0.00558331	0.0988323	0.0700797	0.825505	1	0.000368619	0.000279293	-1.92002e-05	0.999637	-14.5463
192.8	1.15126	0.0895667	0.1318	-0.00517234	0.00304234	1.15295	0.0961167	0.132926	0.000933422	0.0073457	0.00637124	0.115292	0.0833661	1	0.00691067		0.11965	0.0849159	1	1.21148	0.00570434	0.0987635	0.0700929	0.825439	1	0.000434975	0.000211406	0.000140023	0.999528	1.50979
193	1.16971	0.0907782	0.133767	-0.00545639	0.00306176	1.1714	0.0973282	0.134893	0.000649373	0.00736513	0.00628748	0.115156	0.0830874	1	0.00681981		0.119508	0.0846319	1	1.21096	0.00563174	0.0986887	0.0698883	0.825791	1	-0.0004021	9.23436e-05	4.1709e-05	0.999978	2.214
193.2	1.15345	0.0898415	0.131995	-0.00538158	0.00314891	1.15514	0.0963915	0.133122	0.00072418	0.00745227	0.0064514	0.115243	0.0834458	1	0.00699761		0.119598	0.084997	1	1.21159	0.00577555	0.0987117	0.0701531	0.82536	1	0.000675095	0.000164763	0.000234073	0.999413	0.703896		0.703896
193.4	1.15756	0.0897628	0.132457	-0.00550674	0.00293697	1.15925	0.0963128	0.133584	0.000599017	0.00724033	0.00624569	0.115233	0.0830818	1	0.00677448		0.119588	0.0846262	1	1.21099	0.00559418	0.0987521	0.069882	0.825772	1	-0.00042006	0.000162176	-7.3463e-06	0.999962	-22.0759
193.6	1.16842	0.090949	0.133648	-0.00548812	0.00327262	1.17011	0.097499	0.134775	0.000617641	0.00757599	0.00647459	0.115181	0.0833246	1	0.00702276		0.119534	0.0848735	1	1.21143	0.00579708	0.098672	0.0700606	0.82547	1	0.000310148	0.000108895	0.000261305	0.999543	0.416736		0.416736
193.8	1.18002	0.0919871	0.134866	-0.00526955	0.00325923	1.18171	0.0985371	0.135992	0.000836207	0.0075626	0.00639972	0.115081	0.0833854	1	0.00694156	0.00690929	0.11943	0.0849355	1	1.21131	0.00573063	0.0985963	0.0701188	0.825554	1	0.000498048	2.20445e-05	0.000173432	0.999666	0.127107		0.127107	0.452901
194	1.16867	0.0907749	0.133501	-0.00535397	0.00309611	1.17036	0.0973249	0.134627	0.000751788	0.00739948	0.00632241	0.115031	0.0831583	1	0.0068577		0.119378	0.0847041	1	1.21094	0.00566312	0.0985832	0.0699491	0.825805	1	-0.00018535	-2.03632e-05	8.26967e-05	0.999989	-0.24624
194.2	1.18394	0.0921642	0.135643	-0.00547074	0.00311981	1.18563	0.0987142	0.136769	0.000635018	0.00742317	0.00626094	0.115356	0.0832587	1	0.00679102		0.119715	0.0848065	1	1.21131	0.00560633	0.098831	0.070012	0.825551	1	0.000111229	0.000271465	1.05774e-05	0.999687	25.6645
194.4	1.17605	0.0915505	0.134378	-0.00538386	0.00308515	1.17773	0.0981005	0.135504	0.000721894	0.00738852	0.0062735	0.115055	0.083296	1	0.00680465		0.119404	0.0848444	1	1.21105	0.00561879	0.098595	0.0700584	0.825728	1	0.000231229	3.05779e-06	2.52759e-05	0.999907	0.120976
194.6	1.13979	0.0885822	0.130398	-0.00536522	0.00279282	1.14148	0.0951322	0.131525	0.000740536	0.00709619	0.00621666	0.115223	0.0833412	1	0.006743		0.119578	0.0848905	1	1.21121	0.00556715	0.0987258	0.0700873	0.82562	1	0.00036479	0.00015466	-4.14213e-05	0.999785	-3.73383
194.8	1.17015	0.0909698	0.133672	-0.00536604	0.00340001	1.17183	0.0975198	0.134799	0.000739714	0.00770338	0.00657377	0.115032	0.0832198	1	0.00713034		0.11938	0.0847668	1	1.21128	0.00588663	0.098557	0.0699813	0.825575	1	-4.81072e-06	-2.70873e-05	0.000377737	0.999651	-0.0717094		-0.0717094
195	1.18729	0.0925186	0.136211	-0.00554163	0.00317897	1.18897	0.0990686	0.137337	0.000564128	0.00748233	0.0062931	0.115509	0.0833227	1	0.00682591		0.119874	0.0848716	1	1.21157	0.00563393	0.0989411	0.0700508	0.825374	1	0.000299911	0.00040705	4.83445e-05	0.999461	8.41978
195.2	1.17441	0.0913062	0.134239	-0.00539204	0.00310255	1.1761	0.0978562	0.135365	0.000713718	0.00740591	0.00629702	0.115097	0.0832041	1	0.00683016		0.119447	0.0847508	1	1.21103	0.00563997	0.0986324	0.0699826	0.825745	1	-4.79457e-05	3.91378e-05	5.28912e-05	0.999921	0.739967
195.4	1.1631	0.0907268	0.13322	-0.00520787	0.00299093	1.16479	0.0972768	0.134347	0.000897887	0.0072943	0.00626235	0.11534	0.0835148	1	0.00679256		0.119699	0.0850673	1	1.21156	0.00560646	0.0987979	0.0702131	0.825383	1	0.000885155	0.000257739	1.22306e-05	0.999484	21.0733
195.6	1.18403	0.0923576	0.135656	-0.00529118	0.00339959	1.18572	0.0989077	0.136782	0.000814583	0.00770296	0.00649645	0.115358	0.0834159	1	0.00704648		0.119718	0.0849665	1	1.21173	0.00581521	0.0987994	0.0701199	0.825265	1	0.00058087	0.00026641	0.000286928	0.999285	0.92849		0.92849
195.8	1.1896	0.0927063	0.136143	-0.00550584	0.00319741	1.19129	0.0992563	0.137269	0.000599921	0.00750078	0.00629635	0.115227	0.0833184	1	0.00682944	0.00686513	0.119582	0.0848672	1	1.21128	0.0056382	0.0987239	0.0700642	0.825574	1	0.000294031	0.000155796	5.21256e-05	0.99971	2.98886			0.42839
196	1.14907	0.0889234	0.131425	-0.00532358	0.00294672	1.15076	0.0954734	0.132552	0.000782174	0.00725009	0.00630027	0.115186	0.0829656	1	0.00683368		0.11954	0.0845079	1	1.21088	0.00564356	0.0987213	0.0697904	0.825845	1	-0.000771153	0.000119232	5.67283e-05	1.00004	2.10181
196.2	1.14942	0.0894004	0.131348	-0.00529753	0.00307367	1.15111	0.0959504	0.132474	0.000808228	0.00737703	0.00640863	0.115084	0.0833547	1	0.00695122		0.119434	0.0849042	1	1.21129	0.00573869	0.0986004	0.0700941	0.825567	1	0.000405043	2.44367e-05	0.000183888	0.999679	0.132889		0.132889
196.4	1.14702	0.0895884	0.13102	-0.00416445	0.00295047	1.14871	0.0961384	0.132146	0.00194131	0.00725384	0.00631478	0.115039	0.0836927	1	0.00684943		0.119387	0.0852485	1	1.21148	0.00565375	0.0985459	0.070367	0.825433	1	0.00142922	-1.27938e-05	7.37101e-05	0.999541	-0.17357
196.6	1.16129	0.0905461	0.132877	-0.004804	0.00312239	1.16298	0.0970961	0.134003	0.00130176	0.00742575	0.0063851	0.115223	0.083489	1	0.0069257		0.119578	0.085041	1	1.21154	0.00571642	0.098699	0.0701922	0.825392	1	0.000807557	0.000149593	0.000156264	0.999469	0.957309
196.8	1.12461	0.0874038	0.128714	-0.00541698	0.00286518	1.1263	0.0939538	0.12984	0.000688784	0.00716854	0.00636468	0.11528	0.0834181	1	0.00690355		0.119637	0.0849688	1	1.21151	0.0056983	0.0987506	0.0701346	0.825416	1	0.000592351	0.000201052	0.000132313	0.999502	1.51952
197	1.12489	0.087214	0.128573	-0.00525466	0.0030377	1.12658	0.0937641	0.129699	0.000851095	0.00734107	0.00651624	0.115127	0.083229	1	0.00706794		0.119478	0.0847762	1	1.21132	0.0058349	0.0986343	0.0699865	0.825544	1	2.1806e-05	5.91217e-05	0.00031021	0.999625	0.190586		0.190586
197.2	1.10665	0.0855212	0.126302	-0.00551317	0.00243171	1.10834	0.0920712	0.127428	0.00059259	0.00673508	0.00607672	0.114972	0.0830712	1	0.00659121		0.119318	0.0846154	1	1.21052	0.00544492	0.0985668	0.0698998	0.826088	1	-0.00044205	-6.48523e-05	-0.000205868	1.00039	0.315019
197.4	1.13146	0.0876626	0.129285	-0.00539794	0.00277402	1.13315	0.0942126	0.130411	0.000707824	0.00707739	0.00624577	0.115087	0.0831423	1	0.00677457		0.119437	0.0846879	1	1.2109	0.00559466	0.0986348	0.069938	0.825832	1	-0.000233339	3.2423e-05	-7.2816e-06	1.00004	-4.45273
197.6	1.13255	0.087991	0.129693	-0.00532424	0.00286333	1.13424	0.094541	0.130819	0.000781523	0.00716669	0.00631848	0.115336	0.0833516	1	0.00685344		0.119695	0.0849011	1	1.21145	0.00565722	0.0988033	0.0700822	0.825457	1	0.000391146	0.000252369	7.81062e-05	0.999561	3.2311
197.8	1.1349	0.0881306	0.130008	-0.00530386	0.00308138	1.13658	0.0946806	0.131134	0.000801895	0.00738475	0.00649731	0.115376	0.0833027	1	0.00704741	0.00687981	0.119736	0.0848513	1	1.21163	0.00581645	0.0988221	0.0700304	0.825331	1	0.000238704	0.000281875	0.000287964	0.999364	0.978853		0.978853	0.434109
198	1.1227	0.0874002	0.128353	-0.00555336	0.00281526	1.12439	0.0939502	0.129479	0.000552397	0.00711863	0.00633112	0.115156	0.0835569	1	0.00686715		0.119508	0.0851102	1	1.21149	0.00566837	0.0986457	0.0702528	0.825433	1	0.00101565	9.07192e-05	9.29057e-05	0.999534	0.976465
198.2	1.15237	0.0893113	0.131755	-0.00539169	0.00300263	1.15406	0.0958614	0.132881	0.000714071	0.007306	0.0063307	0.115142	0.0830646	1	0.00686669		0.119494	0.0846087	1	1.21097	0.00567041	0.0986763	0.0698686	0.825785	1	-0.000471601	7.88593e-05	9.24473e-05	0.99996	0.853019
198.4	1.12149	0.0869676	0.128249	-0.00523429	0.00282063	1.12318	0.0935176	0.129376	0.000871471	0.00712399	0.00634271	0.115187	0.0832616	1	0.00687972		0.119541	0.0848094	1	1.21123	0.00567995	0.0986936	0.0700193	0.825607	1	0.000122581	0.000118602	0.00010654	0.999741	1.11322
198.6	1.10434	0.0855039	0.126152	-0.00543002	0.00272415	1.10603	0.092054	0.127279	0.000675734	0.00702751	0.0063538	0.115077	0.0832289	1	0.00689174		0.119426	0.0847761	1	1.21109	0.00569051	0.09861	0.0699996	0.8257	1	2.62809e-05	1.95964e-05	0.000119545	0.999854	0.163925
198.8	1.15839	0.0898917	0.132914	-0.00541043	0.00315629	1.16007	0.0964417	0.134041	0.000695329	0.00745966	0.00643033	0.115545	0.083134	1	0.00697475		0.119912	0.0846794	1	1.21157	0.00575681	0.0989726	0.0698926	0.825378	1	-0.000273851	0.000434983	0.0002094	0.999432	2.07729		2.07729
199	1.15502	0.0899749	0.131981	-0.00526639	0.00288171	1.15671	0.0965249	0.133107	0.000839369	0.00718507	0.00621164	0.115074	0.0834478	1	0.00673755		0.119423	0.084999	1	1.21116	0.00556289	0.0986022	0.0701799	0.825655	1	0.000690822	2.1632e-05	-4.73472e-05	0.999833	-0.45688
199.2	1.15641	0.0899142	0.131926	-0.00521436	0.00301883	1.1581	0.0964642	0.133052	0.0008914	0.0073222	0.00632259	0.114888	0.0832951	1	0.00685789		0.119231	0.0848435	1	1.21093	0.00566332	0.0984618	0.0700646	0.82581	1	0.000231822	-0.000147495	8.28797e-05	1	-1.77963
199.4	1.1202	0.0867432	0.127963	-0.00539367	0.0025939	1.12189	0.0932933	0.129089	0.000712088	0.00689726	0.00614791	0.115064	0.0831574	1	0.00666842		0.119413	0.0847033	1	1.21078	0.00550752	0.0986246	0.0699573	0.825911	1	-0.000185177	1.52509e-05	-0.000122207	1.00016	-0.124796
199.6	1.08674	0.0842133	0.124057	-0.00537765	0.00262326	1.08843	0.0907633	0.125184	0.000728105	0.00692663	0.00636389	0.115013	0.0833894	1	0.00690269		0.11936	0.0849396	1	1.2112	0.00569904	0.0985468	0.0701283	0.825626	1	0.000512726	-3.73692e-05	0.000131367	0.999763	-0.284465
199.8	1.11194	0.0862771	0.127423	-0.0053951	0.00262959	1.11363	0.0928271	0.128549	0.00071066	0.00693296	0.00622557	0.115433	0.0833557	1	0.00675266	0.00683993	0.119795	0.0849053	1	1.21145	0.00557402	0.0988857	0.0700855	0.825455	1	0.00040304	0.0003414	-3.0921e-05	0.999577	-11.041			2.07729
200	1.10961	0.0861615	0.127013	-0.00550167	0.0027032	1.1113	0.0927115	0.128139	0.00060409	0.00700657	0.00630484	0.115305	0.0834262	1	0.00683865		0.119663	0.084977	1	1.21148	0.00564487	0.0987746	0.0701432	0.825437	1	0.000617491	0.000225311	6.20955e-05	0.999541	3.62846
200.2	1.10817	0.0858036	0.126825	-0.00536709	0.00257273	1.10986	0.0923536	0.127951	0.000738666	0.00687609	0.00619548	0.115287	0.0832122	1	0.00672002		0.119644	0.0847591	1	1.21112	0.00554859	0.0987874	0.0699839	0.82568	1	-2.62282e-05	0.000211965	-6.62849e-05	0.999862	-3.19779
200.4	1.11004	0.0859821	0.126817	-0.00525549	0.00276942	1.11172	0.0925321	0.127943	0.000850273	0.00707279	0.006362	0.115086	0.0832329	1	0.00690064		0.119435	0.0847802	1	1.21112	0.00569775	0.0986158	0.0700017	0.825685	1	3.80991e-05	2.72834e-05	0.000129169	0.999833	0.211222
200.6	1.11209	0.0862253	0.127333	-0.0051216	0.00273113	1.11378	0.0927753	0.128459	0.000984162	0.00703449	0.00631586	0.115336	0.0832975	1	0.00685059		0.119695	0.084846	1	1.21139	0.00565514	0.0988077	0.0700401	0.825497	1	0.000227838	0.00025206	7.50342e-05	0.999609	3.35927
200.8	1.12162	0.0869315	0.12824	-0.00543759	0.00305479	1.12331	0.0934815	0.129367	0.000668164	0.00735816	0.00655044	0.115166	0.0832198	1	0.00710504		0.119518	0.0847669	1	1.21139	0.00586519	0.0986622	0.0699749	0.825498	1	-7.48649e-06	9.28259e-05	0.000350341	0.999559	0.264959		0.264959
201	1.12128	0.0871715	0.12829	-0.00520676	0.00277255	1.12297	0.0937216	0.129416	0.000899003	0.00707592	0.00630107	0.115244	0.0834585	1	0.00683455		0.1196	0.08501	1	1.21144	0.00564165	0.098725	0.0701724	0.825461	1	0.000716885	0.0001708	5.76509e-05	0.999572	2.96265
201.2	1.04544	0.0806898	0.119428	-0.00528962	0.00228931	1.04713	0.0872398	0.120554	0.000816137	0.00659268	0.00629596	0.115129	0.0833135	1	0.00682901		0.11948	0.0848622	1	1.21117	0.00563836	0.0986483	0.0700663	0.825647	1	0.000281777	6.79125e-05	5.1653e-05	0.999802	1.31478
201.4	1.06327	0.0819854	0.121509	-0.0053676	0.00244017	1.06496	0.0885354	0.122635	0.000738155	0.00674353	0.0063322	0.115155	0.0831351	1	0.00686832		0.119507	0.0846805	1	1.21106	0.00567135	0.0986803	0.0699229	0.825726	1	-0.000258799	9.03528e-05	9.42072e-05	0.999887	0.959085
201.6	1.07927	0.08358	0.123438	-0.00536766	0.00260138	1.08096	0.09013	0.124564	0.000738101	0.00690474	0.00638762	0.115235	0.0833798	1	0.00692843		0.11959	0.0849297	1	1.21145	0.00571913	0.0987169	0.0701059	0.825458	1	0.000477297	0.000160003	0.000159235	0.999548	1.00483
201.8	1.10438	0.0856278	0.126375	-0.00559751	0.00264807	1.10606	0.0921778	0.127501	0.000508247	0.00695143	0.00628484	0.115274	0.0833386	1	0.00681695	0.00686922	0.119631	0.0848878	1	1.21134	0.00562763	0.0987596	0.0700779	0.825535	1	0.000354229	0.000198246	3.86173e-05	0.999665	5.13361			0.264959
202	1.11061	0.0861506	0.127137	-0.00528426	0.00270055	1.1123	0.0927006	0.128263	0.000821495	0.00700391	0.00629681	0.115314	0.0833417	1	0.00682993		0.119672	0.0848909	1	1.21139	0.00563808	0.0987886	0.0700772	0.825496	1	0.000362155	0.00023285	5.26712e-05	0.999614	4.42083
202.2	1.13526	0.0879646	0.129697	-0.00536725	0.00283362	1.13694	0.0945146	0.130823	0.000738508	0.00713698	0.00627734	0.115066	0.0831303	1	0.00680881		0.119414	0.0846757	1	1.2109	0.00562294	0.0986163	0.069928	0.825833	1	-0.000269763	1.21174e-05	2.97799e-05	1.00003	0.406898
202.4	1.13548	0.0882641	0.13009	-0.00532415	0.00288407	1.13716	0.0948141	0.131217	0.000781609	0.00718743	0.00632049	0.115389	0.0833776	1	0.00685561		0.11975	0.0849276	1	1.21153	0.00565862	0.0988421	0.0700992	0.8254	1	0.000468306	0.000299771	8.04678e-05	0.999489	3.72536
202.6	1.16235	0.0903261	0.13268	-0.00534121	0.00298311	1.16404	0.0968761	0.133806	0.000764544	0.00728648	0.00625966	0.11495	0.0832242	1	0.00678964		0.119294	0.0847713	1	1.21086	0.00560731	0.0985207	0.0700094	0.825863	1	1.72371e-05	-9.07051e-05	9.0025e-06	1.00008	-10.0755
202.8	1.14031	0.0884821	0.130579	-0.005409	0.00313883	1.142	0.0950321	0.131706	0.000696761	0.0074422	0.00651679	0.115329	0.0832153	1	0.00706854		0.119687	0.0847622	1	1.21152	0.00583445	0.0987912	0.0699636	0.825411	1	-2.47751e-05	0.000239141	0.000310845	0.999457	0.769324		0.769324
203	1.12782	0.0877373	0.129185	-0.00552606	0.00265473	1.12951	0.0942874	0.130311	0.000579698	0.00695809	0.00616028	0.115369	0.0834764	1	0.00668185		0.11973	0.0850282	1	1.21144	0.00551562	0.0988326	0.0701877	0.825464	1	0.000770772	0.000287066	-0.000107558	0.999606	-2.66894
203.2	1.07051	0.0828852	0.122129	-0.00531643	0.00248666	1.0722	0.0894353	0.123255	0.000789329	0.00679003	0.0063328	0.114955	0.0834129	1	0.00686897		0.1193	0.0849635	1	1.21113	0.00567153	0.0985026	0.0701521	0.825674	1	0.000585839	-8.8307e-05	9.48692e-05	0.99983	-0.930829
203.4	1.03923	0.0802602	0.118994	-0.0053941	0.00239052	1.04092	0.0868102	0.12012	0.000711654	0.00669388	0.00643073	0.115398	0.0833974	1	0.00697519		0.119759	0.0849477	1	1.21168	0.00575662	0.0988369	0.0701073	0.825299	1	0.000525516	0.00030344	0.000209821	0.99934	1.44619		1.44619
203.6	1.08163	0.0836555	0.12421	-0.00533863	0.00255234	1.08332	0.0902056	0.125336	0.000767128	0.0068557	0.00632843	0.115697	0.0832678	1	0.00686422		0.120069	0.0848157	1	1.21175	0.00566472	0.0990876	0.0699945	0.825253	1	0.000128571	0.000573552	8.98266e-05	0.999301	6.38511
203.8	1.10516	0.0857408	0.126426	-0.00537326	0.0027513	1.10685	0.0922908	0.127552	0.0007325	0.00705467	0.00637363	0.115239	0.0833813	1	0.00691326	0.0068656	0.119594	0.0849314	1	1.21144	0.00570665	0.0987208	0.0701078	0.825465	1	0.000482292	0.000163676	0.000142823	0.999559	1.146			1.10776
204	1.11411	0.0864556	0.127369	-0.00546526	0.00272448	1.1158	0.0930056	0.128495	0.000640502	0.00702785	0.00629848	0.11516	0.0833533	1	0.00683175		0.119512	0.0849028	1	1.21125	0.00564026	0.0986689	0.0700954	0.825595	1	0.000401305	9.57318e-05	5.46147e-05	0.999738	1.75286
204.2	1.10262	0.0855087	0.126247	-0.00530635	0.00281548	1.10431	0.0920588	0.127373	0.000799411	0.00711885	0.00644643	0.115342	0.0833633	1	0.00699222		0.119701	0.0849129	1	1.21161	0.00577103	0.0987957	0.0700829	0.82535	1	0.000423439	0.000253578	0.000228251	0.9994	1.11096		1.11096
204.4	1.09981	0.084964	0.125785	-0.00550801	0.0026646	1.1015	0.091514	0.126911	0.000597752	0.00696796	0.00632587	0.115216	0.0830811	1	0.00686145		0.119571	0.0846255	1	1.21106	0.00566567	0.0987324	0.0698773	0.825725	1	-0.00042349	0.000144999	8.67853e-05	0.999886	1.67077
204.6	1.15028	0.0893786	0.132005	-0.00560472	0.00276117	1.15197	0.0959286	0.133131	0.000501043	0.00706454	0.00613259	0.115568	0.0832738	1	0.00665181		0.119936	0.0848218	1	1.21141	0.00549096	0.0990055	0.0700191	0.825484	1	0.000154052	0.000465493	-0.000140032	0.999632	-3.3242
204.8	1.13269	0.087707	0.129638	-0.00563031	0.00275216	1.13438	0.0942571	0.130764	0.000475454	0.00705552	0.00621971	0.115274	0.0830912	1	0.00674631		0.11963	0.0846358	1	1.21101	0.0055708	0.0987853	0.0698885	0.825755	1	-0.000392043	0.000199651	-3.78375e-05	0.999947	-5.27654
205	1.11393	0.0861588	0.127502	-0.00530599	0.00293265	1.11562	0.0927088	0.128628	0.000799772	0.00723602	0.00648612	0.115298	0.083101	1	0.00703527		0.119656	0.0846458	1	1.21134	0.00580786	0.09878	0.069878	0.825534	1	-0.000368588	0.000213103	0.000274886	0.999615	0.775243		0.775243
205.2	1.14143	0.0887803	0.13065	-0.00539745	0.00308486	1.14312	0.0953303	0.131776	0.000708311	0.00738822	0.0064632	0.115277	0.0833947	1	0.00701041		0.119634	0.084945	1	1.21159	0.00578612	0.0987415	0.0701104	0.825362	1	0.000519778	0.000195137	0.000247922	0.999412	0.787093		0.787093
205.4	1.14973	0.0891719	0.131483	-0.00536338	0.00290973	1.15142	0.095722	0.132609	0.000742384	0.0072131	0.0062645	0.11517	0.0831336	1	0.00679489		0.119523	0.084679	1	1.211	0.00561099	0.0986977	0.0699251	0.825766	1	-0.000262292	0.00010563	1.47294e-05	0.999953	7.17139
205.6	1.13583	0.088348	0.129878	-0.00535523	0.00282892	1.13752	0.0948981	0.131004	0.000750532	0.00713228	0.00627002	0.115166	0.0834253	1	0.00680087		0.119519	0.0849761	1	1.2113	0.00561454	0.09867	0.0701531	0.825562	1	0.000619149	0.000101968	2.12004e-05	0.999705	4.80973
205.8	1.10046	0.0853147	0.125788	-0.00530119	0.00256459	1.10215	0.0918647	0.126914	0.000804565	0.00686795	0.0062314	0.115151	0.0833504	1	0.00675899	0.0068484	0.119504	0.0848998	1	1.21116	0.00558058	0.0986685	0.0700978	0.825653	1	0.000394008	9.02692e-05	-2.41323e-05	0.999824	-3.7406			0.8911
206	1.13878	0.0882405	0.130421	-0.00540891	0.00294478	1.14047	0.0947905	0.131547	0.000696847	0.00724815	0.0063554	0.115344	0.0831152	1	0.00689348		0.119704	0.0846603	1	1.21126	0.00569117	0.0988259	0.0698945	0.825588	1	-0.000324089	0.00025842	0.000121456	0.99971	2.1277
206.2	1.12143	0.0870437	0.128387	-0.00543444	0.0028788	1.12311	0.0935937	0.129513	0.000671317	0.00718217	0.00639487	0.115316	0.0833341	1	0.00693629		0.119674	0.0848832	1	1.21149	0.00572541	0.0987823	0.0700649	0.825427	1	0.000337027	0.000231785	0.000167753	0.999507	1.3817
206.4	1.13348	0.0880209	0.12975	-0.00545974	0.00290573	1.13516	0.0945709	0.130876	0.000646017	0.0072091	0.00635071	0.115293	0.0833103	1	0.00688839		0.11965	0.084859	1	1.2114	0.00568632	0.0987702	0.0700505	0.825493	1	0.000266883	0.00021241	0.00011593	0.999597	1.83223
206.6	1.17678	0.0917144	0.134788	-0.00529403	0.0031971	1.17847	0.0982644	0.135914	0.000811724	0.00750047	0.00636459	0.115331	0.0833832	1	0.00690345		0.11969	0.0849332	1	1.21153	0.00569814	0.0987926	0.0701043	0.825405	1	0.000485637	0.000246227	0.000132214	0.999486	1.86233
206.8	1.16424	0.0906428	0.133153	-0.00530958	0.00302948	1.16593	0.0971928	0.13428	0.000796177	0.00733285	0.00628927	0.11517	0.0833607	1	0.00682175		0.119522	0.0849104	1	1.21125	0.00563197	0.0986764	0.0701012	0.82559	1	0.000423579	0.000104534	4.37977e-05	0.999734	2.38676
207	1.16031	0.0900567	0.132626	-0.00527504	0.00319549	1.162	0.0966067	0.133752	0.000830714	0.00749886	0.0064534	0.115105	0.0831383	1	0.00699978		0.119455	0.0846838	1	1.21114	0.00577951	0.0986304	0.0699208	0.825669	1	-0.000250433	4.15408e-05	0.000236482	0.999792	0.175662		0.175662
207.2	1.14523	0.0887901	0.130741	-0.00526857	0.00299835	1.14692	0.0953401	0.131867	0.000837192	0.00730172	0.00636637	0.114975	0.083127	1	0.00690538		0.11932	0.0846723	1	1.2109	0.00570269	0.0985388	0.0699252	0.825833	1	-0.000279284	-7.16127e-05	0.000134308	1.00002	-0.533196
207.4	1.1383	0.0882936	0.129885	-0.00551748	0.0028804	1.13999	0.0948436	0.131011	0.00058828	0.00718377	0.00630159	0.114923	0.0831967	1	0.00683512		0.119266	0.0847433	1	1.21084	0.00564491	0.0984985	0.0699869	0.82587	1	-6.60457e-05	-0.000115961	5.82342e-05	1.00008	-1.99129
207.6	1.14031	0.0884142	0.130587	-0.00522839	0.00285046	1.142	0.0949642	0.131714	0.00087737	0.00715383	0.00626431	0.115336	0.0831562	1	0.00679468		0.119695	0.0847021	1	1.21119	0.00560991	0.0988244	0.0699328	0.825633	1	-0.000198003	0.000254139	1.45305e-05	0.999786	17.49
207.8	1.13964	0.0886606	0.130387	-0.00531354	0.00290777	1.14133	0.0952106	0.131513	0.000792215	0.00721113	0.00631821	0.115228	0.0834211	1	0.00685314	0.00688315	0.119583	0.0849719	1	1.21141	0.00565717	0.0987142	0.070143	0.825486	1	0.000603843	0.00015603	7.77702e-05	0.999598	2.0063			0.175662
208	1.16148	0.0900441	0.132862	-0.00553137	0.00307315	1.16316	0.0965941	0.133988	0.000574386	0.00737652	0.00634177	0.115193	0.0830442	1	0.0068787		0.119547	0.084588	1	1.21101	0.00568012	0.0987162	0.0698489	0.825755	1	-0.000534599	0.000123803	0.00010545	0.99992	1.17404
208.2	1.1437	0.088935	0.130432	-0.00534434	0.00308602	1.14539	0.095485	0.131558	0.000761418	0.00738939	0.00645143	0.114859	0.0833648	1	0.00699764		0.1192	0.0849145	1	1.21111	0.00577786	0.0984222	0.0701128	0.825687	1	0.00044049	-0.000177627	0.000234124	0.999821	-0.75869		-0.75869
208.4	1.1385	0.0882964	0.130098	-0.00555776	0.00283813	1.14019	0.0948464	0.131225	0.000548002	0.00714149	0.00626344	0.11509	0.0831849	1	0.00679373		0.11944	0.0847313	1	1.21097	0.00561018	0.0986322	0.06997	0.825788	1	-0.00010508	3.47555e-05	1.34645e-05	0.999981	2.58127
208.6	1.13275	0.0879388	0.129406	-0.00546448	0.00311853	1.13444	0.0944888	0.130532	0.000641275	0.0074219	0.00654235	0.115063	0.0832912	1	0.00709626		0.119412	0.0848396	1	1.21135	0.00585815	0.0985778	0.0700373	0.825527	1	0.00021097	1.65024e-06	0.000340839	0.999599	0.00484169		0.00484169
208.8	1.10976	0.085916	0.126888	-0.00551588	0.00253753	1.11145	0.092466	0.128015	0.000589875	0.00684089	0.00615491	0.115178	0.0831938	1	0.00667602		0.119531	0.0847404	1	1.21095	0.00551305	0.0987086	0.0699786	0.8258	1	-7.8057e-05	0.000116327	-0.000113947	1.00002	-1.02089
209	1.11387	0.0862233	0.127121	-0.00533848	0.00283745	1.11555	0.0927733	0.128247	0.000767282	0.00714082	0.00640114	0.114963	0.0831634	1	0.00694309		0.119308	0.0847093	1	1.21096	0.00573354	0.0985233	0.0699522	0.825791	1	-0.000169875	-8.35201e-05	0.000175123	0.999956	-0.476922		-0.476922
209.2	1.11583	0.0864814	0.127575	-0.00546631	0.0027266	1.11752	0.0930314	0.128701	0.000639445	0.00702997	0.00629067	0.115166	0.0832478	1	0.00682327		0.119519	0.0847954	1	1.21114	0.00563377	0.0986833	0.070013	0.82567	1	8.24887e-05	0.000101713	4.54439e-05	0.99983	2.23821
209.4	1.11836	0.0869123	0.127801	-0.00537006	0.00254932	1.12005	0.0934623	0.128927	0.000735703	0.00685269	0.0061182	0.115108	0.0834448	1	0.0066362		0.119459	0.084996	1	1.21109	0.00547952	0.0986373	0.0701814	0.825702	1	0.000682985	5.54038e-05	-0.000157045	0.999912	-0.352789
209.6	1.11322	0.0864538	0.127337	-0.00539217	0.0027177	1.1149	0.0930038	0.128463	0.000713592	0.00702106	0.00629746	0.115224	0.0834187	1	0.00683064		0.119579	0.0849695	1	1.21138	0.00563873	0.0987129	0.0701428	0.825506	1	0.000597284	0.000152743	5.34211e-05	0.999628	2.85922
209.8	1.11297	0.0863367	0.127396	-0.00549557	0.00289725	1.11466	0.0928867	0.128523	0.000610188	0.00720061	0.00645994	0.115303	0.0833322	1	0.00700688	0.00686824	0.11966	0.0848813	1	1.21155	0.0057834	0.0987665	0.0700602	0.82539	1	0.000330327	0.000217894	0.000244113	0.999446	0.892592		0.892592	-0.0845445
210	1.13633	0.0880709	0.129829	-0.00546056	0.0028524	1.13802	0.094621	0.130956	0.0006452	0.00715576	0.0062879	0.115073	0.0831452	1	0.00682027		0.119422	0.0846908	1	1.21093	0.00563224	0.09862	0.0699385	0.825809	1	-0.000225199	1.85191e-05	4.21861e-05	1	0.438985
210.2	1.13195	0.0878194	0.129295	-0.0053483	0.00309599	1.13364	0.0943694	0.130422	0.000757457	0.00739936	0.00652707	0.115047	0.0832444	1	0.00707969		0.119395	0.0847919	1	1.21127	0.00584486	0.0985702	0.0700027	0.825582	1	7.03883e-05	-1.274e-05	0.000322921	0.99967	-0.0394523		-0.0394523
210.4	1.12076	0.0868382	0.128208	-0.00524071	0.00277728	1.12245	0.0933882	0.129335	0.000865048	0.00708064	0.0063082	0.115225	0.0832003	1	0.00684229		0.11958	0.0847469	1	1.21117	0.00564932	0.0987311	0.0699712	0.825648	1	-6.30689e-05	0.000153703	6.60378e-05	0.999798	2.32751
210.6	1.13321	0.0879482	0.129604	-0.00539722	0.00292462	1.1349	0.0944982	0.130731	0.000708542	0.00722798	0.00636884	0.115192	0.0832659	1	0.00690806		0.119545	0.0848137	1	1.21127	0.00570317	0.0986943	0.0700207	0.825582	1	0.00013476	0.000121701	0.000137211	0.999704	0.886967
210.8	1.1349	0.0881673	0.129754	-0.00531222	0.00288072	1.13659	0.0947173	0.13088	0.000793543	0.00718408	0.00632076	0.115152	0.083335	1	0.00685591		0.119504	0.0848841	1	1.21124	0.00566022	0.0986625	0.0700801	0.825597	1	0.000345545	8.80968e-05	8.07618e-05	0.999735	1.09082
211	1.15654	0.0898932	0.132216	-0.00530278	0.00301671	1.15823	0.0964432	0.133343	0.00080298	0.00732008	0.00632004	0.115126	0.0832675	1	0.00685512		0.119477	0.0848154	1	1.21115	0.00566002	0.0986478	0.0700289	0.825663	1	0.00014234	6.46828e-05	7.99131e-05	0.999816	0.809414
211.2	1.13121	0.0879322	0.129163	-0.0054835	0.00288867	1.13289	0.0944822	0.13029	0.000622262	0.00719204	0.00634838	0.115006	0.083399	1	0.00688587		0.119353	0.0849494	1	1.21119	0.00568522	0.0985418	0.0701372	0.825636	1	0.000542306	-4.33197e-05	0.000113165	0.999779	-0.382801
211.4	1.13805	0.0884324	0.130254	-0.00542696	0.00293525	1.13974	0.0949824	0.13138	0.000678797	0.00723861	0.00635111	0.115272	0.0833368	1	0.00688883		0.119628	0.084886	1	1.2114	0.00568665	0.0987519	0.0700725	0.825489	1	0.000347492	0.000193775	0.000116393	0.999593	1.66483
211.6	1.12368	0.0868074	0.128545	-0.00549566	0.00272503	1.12537	0.0933574	0.129671	0.000610102	0.00702839	0.00624541	0.115225	0.0829572	1	0.00677418		0.11958	0.0844993	1	1.21085	0.00559455	0.0987569	0.0697849	0.825864	1	-0.000796534	0.000155727	-7.67407e-06	1.00007	-20.2926
211.8	1.15883	0.0902561	0.132553	-0.00507514	0.00309621	1.16052	0.0968061	0.13368	0.00103061	0.00739958	0.00637609	0.11519	0.0834162	1	0.00691592	0.00688261	0.119543	0.0849669	1	1.21143	0.00570891	0.0986796	0.0701379	0.825474	1	0.000588781	0.000119578	0.000145698	0.999571	0.820722			-0.0394523
212	1.1287	0.0873943	0.128664	-0.00549961	0.00279713	1.13039	0.0939443	0.12979	0.000606154	0.0071005	0.00628147	0.114819	0.0831081	1	0.0068133		0.119159	0.084653	1	1.21062	0.00562792	0.0984273	0.0699251	0.82602	1	-0.00033094	-0.000208229	3.45999e-05	1.00027	-6.01821
212.2	1.09454	0.0848372	0.12532	-0.00544842	0.00280421	1.09623	0.0913872	0.126446	0.000657337	0.00710757	0.00648367	0.115347	0.0833653	1	0.00703261		0.119706	0.084915	1	1.21165	0.00580414	0.0987956	0.0700819	0.825318	1	0.00042868	0.000256284	0.000271945	0.999352	0.942412		0.942412
212.4	1.07876	0.0834898	0.123374	-0.00552902	0.00250876	1.08045	0.0900398	0.1245	0.000576739	0.00681212	0.00630488	0.11523	0.0833353	1	0.00683868		0.119585	0.0848844	1	1.21131	0.0056457	0.0987238	0.0700767	0.825554	1	0.000344782	0.000157949	6.21307e-05	0.999684	2.5422
212.6	1.12894	0.0875406	0.128991	-0.00527896	0.00286494	1.13063	0.0940906	0.130117	0.000826798	0.0071683	0.00634008	0.115084	0.0832195	1	0.00687687		0.119433	0.0847665	1	1.21108	0.00567831	0.0986174	0.0699927	0.825712	1	-2.15015e-06	2.62953e-05	0.000103444	0.999871	0.254198
212.8	1.11735	0.0865139	0.127752	-0.00567521	0.00277813	1.11904	0.093064	0.128878	0.00043055	0.0070815	0.00632821	0.115169	0.0831644	1	0.00686399		0.119522	0.0847104	1	1.2111	0.00566759	0.0986891	0.0699452	0.825698	1	-0.000170365	0.000103046	8.95251e-05	0.999855	1.15103
213	1.13914	0.0884414	0.130327	-0.00544305	0.0028613	1.14083	0.0949914	0.131453	0.000662712	0.00716466	0.00628022	0.115226	0.0832652	1	0.00681194		0.119581	0.0848131	1	1.21121	0.0056241	0.0987286	0.0700237	0.825624	1	0.000133736	0.000155041	3.31917e-05	0.999775	4.67109
213.2	1.11907	0.0868574	0.127764	-0.00545438	0.00282223	1.12076	0.0934074	0.12889	0.000651384	0.0071256	0.00635785	0.115003	0.0833432	1	0.00689614		0.119349	0.0848925	1	1.21114	0.00569393	0.0985432	0.0700932	0.82567	1	0.00037348	-4.63892e-05	0.000124281	0.999818	-0.373261
213.4	1.15727	0.0898321	0.132495	-0.0054123	0.00296615	1.15896	0.0963821	0.133621	0.000693455	0.00726951	0.00627244	0.115294	0.0831625	1	0.0068035		0.119651	0.0847084	1	1.21116	0.00561732	0.0987904	0.0699397	0.825653	1	-0.000178254	0.000216015	2.4065e-05	0.99981	8.97631
213.6	1.15049	0.0893208	0.131647	-0.00533464	0.00302271	1.15218	0.0958708	0.132773	0.000771117	0.00732607	0.00635844	0.115237	0.083208	1	0.00689677		0.119592	0.0847548	1	1.21124	0.00569396	0.0987347	0.0699734	0.825598	1	-4.08983e-05	0.000162114	0.000125005	0.999724	1.29686
213.8	1.1642	0.0901789	0.133126	-0.00526461	0.00304729	1.16589	0.0967289	0.134252	0.000841153	0.00735066	0.00630475	0.11515	0.0829656	1	0.00683854	0.00686723	0.119502	0.0845078	1	1.21085	0.00564773	0.0986925	0.0697923	0.825867	1	-0.000770546	8.62879e-05	6.19872e-05	1.00007	1.39203			0.942412
214	1.12561	0.0873105	0.128634	-0.00542897	0.00277008	1.1273	0.0938606	0.12976	0.000676791	0.00707345	0.00627469	0.115107	0.0832615	1	0.00680594		0.119457	0.0848093	1	1.21107	0.00561976	0.0986377	0.0700282	0.825714	1	0.000125659	4.92039e-05	2.66769e-05	0.999889	1.84444
214.2	1.14517	0.0891196	0.130992	-0.00553474	0.00294458	1.14686	0.0956696	0.132118	0.000571021	0.00724794	0.00631984	0.1152	0.0834191	1	0.00685491		0.119554	0.0849698	1	1.21138	0.00565877	0.0986927	0.070143	0.825505	1	0.000598425	0.000131067	7.9682e-05	0.999623	1.64488
214.4	1.13079	0.0875349	0.129013	-0.00542174	0.00283276	1.13247	0.0940849	0.13014	0.000684019	0.00713613	0.00630136	0.114916	0.0830791	1	0.00683486		0.119259	0.0846235	1	1.21072	0.0056453	0.098503	0.0698953	0.825956	1	-0.00042151	-0.000122124	5.79656e-05	1.00018	-2.10683
214.6	1.10445	0.0853443	0.126177	-0.00544294	0.00263509	1.10614	0.0918943	0.127303	0.000662816	0.00693846	0.00627266	0.115088	0.0830763	1	0.00680374		0.119437	0.0846207	1	1.21086	0.00561892	0.0986384	0.0698847	0.825858	1	-0.000433429	3.20856e-05	2.42982e-05	1.00006	1.32049
214.8	1.11977	0.0868268	0.12847	-0.00542831	0.00286601	1.12146	0.0933768	0.129596	0.000677447	0.00716938	0.00639289	0.11556	0.0832635	1	0.00693415		0.119928	0.0848114	1	1.21167	0.00572279	0.0989771	0.0699952	0.825305	1	0.000117812	0.000450025	0.000165455	0.999352	2.71992
215	1.14701	0.0890237	0.131302	-0.00536047	0.00304471	1.1487	0.0955737	0.132428	0.000745288	0.00734807	0.00639688	0.115285	0.0832019	1	0.00693848		0.119643	0.0847486	1	1.21133	0.00572799	0.0987696	0.0699633	0.825539	1	-6.14297e-05	0.000204557	0.000170136	0.999642	1.20232		1.20232
215.2	1.15905	0.0899993	0.13265	-0.00538015	0.00306403	1.16073	0.0965493	0.133777	0.000725612	0.00736739	0.00634718	0.115252	0.0831795	1	0.00688457		0.119608	0.0847257	1	1.21122	0.00568401	0.0987498	0.0699509	0.825615	1	-0.000127371	0.000175998	0.0001118	0.999748	1.57422
215.4	1.13272	0.0879771	0.129279	-0.00534532	0.00288482	1.13441	0.0945271	0.130406	0.000760443	0.00718818	0.00633652	0.114955	0.0833274	1	0.006873		0.1193	0.0848764	1	1.21105	0.00567525	0.0985093	0.0700851	0.82573	1	0.000327483	-8.8507e-05	9.92388e-05	0.999898	-0.891858
215.6	1.16402	0.0906027	0.132952	-0.00528445	0.00308977	1.1657	0.0971528	0.134079	0.000821305	0.00739314	0.0063422	0.115019	0.0833425	1	0.00687917		0.119367	0.0848918	1	1.21114	0.00567992	0.0985574	0.0700926	0.82567	1	0.000371341	-3.11484e-05	0.00010592	0.999822	-0.294074
215.8	1.15932	0.0901279	0.13245	-0.00533342	0.00280808	1.16101	0.096678	0.133577	0.000772341	0.00711144	0.00612523	0.115052	0.0832707	1	0.00664383	0.00684527	0.119401	0.0848187	1	1.21086	0.00548685	0.098608	0.0700481	0.825857	1	0.000158163	5.26655e-06	-0.000148828	1.0001	-0.0353867			1.20232
216	1.17302	0.0910713	0.134345	-0.00546373	0.00326222	1.17471	0.0976213	0.135472	0.000642024	0.00756559	0.0064404	0.115324	0.0831027	1	0.00698568		0.119682	0.0846475	1	1.21132	0.00576702	0.0988035	0.0698807	0.825549	1	-0.0003632	0.000237285	0.000221224	0.999643	1.0726		1.0726
216.2	1.16719	0.0907169	0.133427	-0.00534531	0.00304161	1.16888	0.0972669	0.134553	0.000760448	0.00734498	0.0062838	0.115113	0.0832141	1	0.00681582		0.119464	0.084761	1	1.21104	0.00562807	0.0986456	0.0699902	0.825736	1	-1.79863e-05	5.44102e-05	3.73734e-05	0.999913	1.45585
216.4	1.17055	0.0909809	0.133864	-0.00538689	0.00303022	1.17224	0.0975309	0.13499	0.000718868	0.00733359	0.00625605	0.115156	0.0832005	1	0.00678572		0.119508	0.0847471	1	1.21104	0.00560321	0.098682	0.0699788	0.825736	1	-5.95358e-05	9.32714e-05	4.79773e-06	0.999918	19.4407
216.6	1.1831	0.0919944	0.135109	-0.00546162	0.00307207	1.18479	0.0985444	0.136235	0.000644138	0.00737544	0.00622513	0.114987	0.0831749	1	0.00675218		0.119333	0.0847211	1	1.21081	0.0055766	0.0985567	0.0699708	0.825896	1	-0.000132053	-5.61996e-05	-3.15426e-05	1.00012	1.78171
216.8	1.2129	0.0948946	0.138962	-0.00523499	0.00340422	1.21459	0.101445	0.140088	0.000870772	0.00770759	0.00634586	0.115338	0.0835219	1	0.00688313		0.119697	0.0850746	1	1.21165	0.00568077	0.0987883	0.0702135	0.825317	1	0.000905	0.000253172	0.00011022	0.999385	2.29698
217	1.19704	0.0930563	0.136519	-0.00546254	0.00333845	1.19873	0.0996063	0.137645	0.000643221	0.00764181	0.00637492	0.114826	0.0830931	1	0.00691465		0.119165	0.0846378	1	1.21072	0.0057112	0.0984254	0.0699071	0.825956	1	-0.000378282	-0.000205231	0.000144335	1.00017	-1.4219
217.2	1.12954	0.0874115	0.129009	-0.00550087	0.00279563	1.13123	0.0939615	0.130135	0.000604885	0.007099	0.00627547	0.115039	0.0830614	1	0.00680678		0.119386	0.0846054	1	1.2108	0.00562173	0.0986014	0.0698757	0.825901	1	-0.000477553	-1.18322e-05	2.75835e-05	1.00012	-0.42896
217.4	1.17696	0.0916458	0.134796	-0.00542297	0.00312496	1.17864	0.0981958	0.135922	0.000682786	0.00742832	0.00630243	0.11532	0.0833125	1	0.00683603		0.119679	0.0848612	1	1.21138	0.00564319	0.0987958	0.0700536	0.825507	1	0.000273696	0.000238777	5.92687e-05	0.999626	4.02872
217.6	1.18118	0.0917928	0.135191	-0.00510109	0.00331149	1.18287	0.0983428	0.136317	0.00100466	0.00761486	0.00643763	0.115243	0.0831394	1	0.00698268		0.119599	0.0846849	1	1.21127	0.00576477	0.0987387	0.0699144	0.825582	1	-0.000250183	0.000165671	0.00021797	0.999686	0.760062		0.760062
217.8	1.15173	0.0894784	0.131705	-0.00552203	0.00300479	1.15342	0.0960284	0.132832	0.000583727	0.00730815	0.00633606	0.115163	0.0832553	1	0.00687251	0.00686352	0.119516	0.0848029	1	1.21119	0.00567417	0.0986761	0.0700161	0.825634	1	0.000104096	9.72842e-05	9.8734e-05	0.999775	0.985316			0.91633
218	1.13411	0.0878585	0.130012	-0.00535276	0.0029889	1.1358	0.0944086	0.131138	0.000753003	0.00729227	0.00642039	0.115459	0.0831209	1	0.00696397		0.119822	0.084666	1	1.21145	0.00574845	0.0989081	0.069888	0.825455	1	-0.000311241	0.000358463	0.000197739	0.99953	1.81281		1.81281
218.2	1.15845	0.0901153	0.13251	-0.00533681	0.00298802	1.16014	0.0966653	0.133636	0.000768944	0.00729139	0.00628491	0.115189	0.0833219	1	0.00681702		0.119543	0.0848709	1	1.21123	0.00562818	0.0986954	0.0700699	0.825607	1	0.000306022	0.000122374	3.86826e-05	0.999754	3.16355
218.4	1.15603	0.0898143	0.132303	-0.00531899	0.00296249	1.15772	0.0963643	0.13343	0.000786768	0.00726586	0.006276	0.115252	0.0832362	1	0.00680736		0.119608	0.0847835	1	1.2112	0.00562035	0.0987517	0.0699997	0.825628	1	4.54669e-05	0.000178623	2.82369e-05	0.99978	6.32588
218.6	1.15214	0.0893283	0.131685	-0.00567087	0.00293684	1.15383	0.0958783	0.132811	0.000434891	0.00724021	0.00627494	0.115104	0.0830958	1	0.00680621		0.119455	0.0846405	1	1.2109	0.00562078	0.0986494	0.0698988	0.825831	1	-0.000375098	4.68893e-05	2.69779e-05	1.00003	1.73806
218.8	1.14612	0.0893017	0.131135	-0.00543695	0.00300306	1.14781	0.0958517	0.132261	0.00066881	0.00730642	0.00636556	0.115229	0.0835086	1	0.0069045		0.119584	0.085061	1	1.21155	0.0056989	0.0987036	0.0702084	0.825389	1	0.00086724	0.00015545	0.000133329	0.99947	1.16591
219	1.16961	0.090889	0.133755	-0.00535827	0.00314363	1.17129	0.097439	0.134881	0.000747488	0.00744699	0.00635792	0.115156	0.0831892	1	0.00689622		0.119508	0.0847357	1	1.21114	0.00569399	0.0986742	0.0699636	0.825668	1	-9.5661e-05	9.02683e-05	0.000124397	0.999812	0.725644
219.2	1.15376	0.0896958	0.131938	-0.00505545	0.00300198	1.15545	0.0962458	0.133064	0.00105031	0.00730535	0.0063225	0.115162	0.0832971	1	0.0068578		0.119514	0.0848456	1	1.21122	0.00566191	0.0986728	0.0700498	0.825615	1	0.000230993	9.65707e-05	8.28142e-05	0.999756	1.16611
219.4	1.15729	0.0898495	0.132182	-0.00553628	0.00299953	1.15898	0.0963995	0.133308	0.000569476	0.0073029	0.00630114	0.115022	0.0831761	1	0.00683463		0.119369	0.0847223	1	1.21093	0.00564413	0.0985769	0.0699649	0.825814	1	-0.00013075	-2.73842e-05	5.77196e-05	1.00001	-0.474435
219.6	1.12933	0.0875791	0.129184	-0.00537559	0.00291495	1.13102	0.0941292	0.13031	0.000730165	0.00721832	0.00638214	0.115215	0.0832252	1	0.00692249		0.11957	0.0847723	1	1.21126	0.00571509	0.0987147	0.0699866	0.825584	1	1.09909e-05	0.000142306	0.000152829	0.999702	0.93114
219.8	1.17371	0.0913054	0.134309	-0.00551929	0.00315887	1.17539	0.0978554	0.135435	0.000586469	0.00746223	0.0063487	0.115225	0.0832533	1	0.00688622	0.00686964	0.11958	0.0848009	1	1.21127	0.00568514	0.098723	0.0700101	0.825582	1	9.62133e-05	0.00015218	0.000113577	0.999707	1.33988			1.81281
220	1.13018	0.0879256	0.128857	-0.00543326	0.00269229	1.13187	0.0944756	0.129983	0.000672496	0.00699565	0.00618064	0.11484	0.0834689	1	0.00670392		0.11918	0.0850206	1	1.2109	0.00553629	0.0984225	0.0702124	0.825829	1	0.000761421	-0.000186266	-8.3806e-05	1.00006	2.22259
220.2	1.16206	0.0901728	0.13274	-0.00531356	0.0033002	1.16375	0.0967228	0.133866	0.000792197	0.00760357	0.0065337	0.11503	0.0831134	1	0.00708688		0.119378	0.0846584	1	1.21112	0.0058515	0.098568	0.0699008	0.82568	1	-0.000325371	-2.74256e-05	0.000330744	0.999787	-0.0829207		-0.0829207
220.4	1.15037	0.0892155	0.13187	-0.00520321	0.00308947	1.15206	0.0957655	0.132996	0.000902544	0.00739283	0.00641706	0.115442	0.0831255	1	0.00696036		0.119805	0.0846708	1	1.21144	0.00574554	0.0988951	0.0698929	0.825466	1	-0.000296743	0.000343719	0.000193828	0.999545	1.77332		1.77332
220.6	1.14265	0.0887264	0.130674	-0.0054049	0.0028466	1.14434	0.0952764	0.131801	0.000700858	0.00714997	0.00624814	0.115177	0.0832592	1	0.00677714		0.11953	0.0848069	1	1.21111	0.00559579	0.098694	0.0700239	0.825686	1	0.000117478	0.000112246	-4.48046e-06	0.99986	-25.0524
220.8	1.12759	0.0876448	0.12923	-0.00546426	0.00280882	1.12928	0.0941948	0.130356	0.0006415	0.00711218	0.006298	0.115433	0.0834117	1	0.00683122		0.119796	0.0849622	1	1.21159	0.00563823	0.0988751	0.0701246	0.825362	1	0.000570451	0.000339587	5.40808e-05	0.999448	6.27925
221	1.12517	0.0872272	0.128647	-0.00544464	0.00268851	1.12686	0.0937772	0.129773	0.000661117	0.00699188	0.00620477	0.115164	0.0832202	1	0.0067301		0.119516	0.0847673	1	1.21101	0.00555741	0.0986911	0.0699969	0.825755	1	9.86685e-07	0.000102063	-5.54071e-05	0.999953	-1.84206
221.2	1.1294	0.0876524	0.129056	-0.00551055	0.00290925	1.13109	0.0942024	0.130182	0.000595209	0.00721261	0.00637668	0.115094	0.0832845	1	0.00691656		0.119444	0.0848327	1	1.21119	0.00571054	0.0986167	0.0700406	0.825632	1	0.00019329	3.42493e-05	0.0001464	0.999766	0.233944
221.4	1.13185	0.0875596	0.129281	-0.00534648	0.00288383	1.13354	0.0941096	0.130408	0.000759277	0.0071872	0.0063405	0.115045	0.0830229	1	0.00687732		0.119393	0.0845663	1	1.21084	0.00567981	0.0986036	0.0698412	0.825875	1	-0.000595197	-8.4685e-06	0.000103953	1.00007	-0.0814649
221.6	1.15554	0.0898787	0.132353	-0.00543805	0.00327414	1.15723	0.0964287	0.133479	0.000667708	0.0075775	0.00654796	0.115344	0.0833271	1	0.00710234		0.119703	0.0848761	1	1.21168	0.00586156	0.0987908	0.0700482	0.825299	1	0.000311975	0.000251591	0.000347376	0.999314	0.724261		0.724261
221.8	1.13074	0.0875235	0.129069	-0.00544259	0.00264937	1.13242	0.0940735	0.130195	0.000663169	0.00695274	0.00613969	0.11497	0.0830727	1	0.00665951	0.00686454	0.119315	0.0846169	1	1.21059	0.00550104	0.0985596	0.0698972	0.826042	1	-0.000438855	-6.86672e-05	-0.000131896	1.00032	0.520615			0.804887
222	1.13233	0.08766	0.129618	-0.00558059	0.0028631	1.13402	0.0942101	0.130744	0.000525168	0.00716647	0.00631953	0.115293	0.0830763	1	0.00685458		0.11965	0.0846206	1	1.21113	0.00565968	0.0987926	0.0698694	0.825678	1	-0.000439683	0.000213631	7.93557e-05	0.999829	2.69207
222.2	1.12976	0.0876838	0.129372	-0.00522264	0.00287086	1.13144	0.0942338	0.130499	0.000883121	0.00717423	0.00634077	0.115338	0.0832864	1	0.00687762		0.119697	0.0848346	1	1.21141	0.00567737	0.0988082	0.0700297	0.825485	1	0.000193506	0.000253355	0.000104274	0.999589	2.4297
222.4	1.13027	0.0876151	0.129234	-0.00551877	0.00303535	1.13196	0.0941652	0.13036	0.000586989	0.00733871	0.00648321	0.115163	0.083188	1	0.00703211		0.119516	0.0847344	1	1.21128	0.00580551	0.0986689	0.0699543	0.825571	1	-0.000102348	9.27969e-05	0.000271454	0.999664	0.341851		0.341851
222.6	1.16455	0.0903448	0.133207	-0.00547856	0.00303397	1.16624	0.0968948	0.134333	0.000627199	0.00733734	0.00629146	0.115185	0.0830832	1	0.00682413		0.119539	0.0846277	1	1.21099	0.00563516	0.0987115	0.069883	0.82577	1	-0.000415482	0.000118607	4.63837e-05	0.999951	2.55708
222.8	1.15417	0.0897321	0.132204	-0.00550609	0.00314441	1.15586	0.0962821	0.13333	0.000599668	0.00744777	0.00644349	0.115351	0.0832992	1	0.00698903		0.119711	0.0848477	1	1.21155	0.00576868	0.0988084	0.0700324	0.82539	1	0.000229672	0.000261941	0.000224819	0.999449	1.16512		1.16512
223	1.16965	0.0909858	0.133776	-0.00541652	0.0031032	1.17134	0.0975358	0.134902	0.000689236	0.00740657	0.00632317	0.11517	0.0832687	1	0.00685852		0.119522	0.0848166	1	1.2112	0.0056626	0.0986811	0.0700271	0.825629	1	0.000144849	0.000103429	8.35951e-05	0.999773	1.23726
223.2	1.16057	0.0900964	0.132658	-0.00564207	0.00296863	1.16226	0.0966464	0.133784	0.000463687	0.007272	0.00625678	0.115107	0.0831539	1	0.00678652		0.119458	0.0846997	1	1.21094	0.00560432	0.0986484	0.0699452	0.825802	1	-0.000199052	4.99794e-05	5.65432e-06	1	8.83915
223.4	1.14993	0.0892563	0.131491	-0.00528406	0.00306466	1.15162	0.0958064	0.132617	0.000821703	0.00736803	0.00639795	0.115157	0.0831924	1	0.00693963		0.119509	0.0847389	1	1.21119	0.00572961	0.0986708	0.0699635	0.825636	1	-8.68766e-05	8.95439e-05	0.000171382	0.999763	0.522481		0.522481
223.6	1.15814	0.0900743	0.132441	-0.00551636	0.00294458	1.15983	0.0966243	0.133567	0.000589396	0.00724795	0.00624917	0.115162	0.0833093	1	0.00677826		0.119514	0.084858	1	1.21115	0.00559655	0.0986781	0.070064	0.825661	1	0.000269335	9.87497e-05	-3.27127e-06	0.99983	-30.187
223.8	1.13276	0.0875962	0.129155	-0.00559821	0.00300208	1.13445	0.0941462	0.130281	0.000507552	0.00730545	0.00643963	0.114841	0.0829883	1	0.00698484	0.00689252	0.119181	0.084531	1	1.2107	0.00576927	0.0984399	0.0698202	0.825971	1	-0.000696752	-0.000194	0.000220341	1.00017	-0.880454		-0.880454	0.28725
224	1.11277	0.0864614	0.127524	-0.00546583	0.00286196	1.11446	0.0930114	0.128651	0.000639928	0.00716532	0.00642942	0.115438	0.0834587	1	0.00697376		0.119801	0.0850102	1	1.21178	0.00575495	0.098863	0.0701529	0.825229	1	0.00070972	0.000339321	0.000208273	0.999255	1.62922		1.62922
224.2	1.10366	0.0850488	0.125666	-0.005508	0.00263282	1.10535	0.0915988	0.126792	0.000597762	0.00693619	0.00627512	0.114708	0.0828688	1	0.00680641		0.119043	0.0844093	1	1.21026	0.00562392	0.0983618	0.0697448	0.826269	1	-0.00105175	-0.000307288	2.71238e-05	1.00057	-11.3291
224.4	1.0745	0.0831905	0.122925	-0.00548794	0.00234607	1.07619	0.0897405	0.124052	0.000617818	0.00664943	0.0061787	0.11527	0.0833876	1	0.00670183		0.119626	0.0849377	1	1.21127	0.00553291	0.0987615	0.0701231	0.825583	1	0.000504479	0.000197638	-8.59717e-05	0.999748	-2.29887
224.6	1.11134	0.086156	0.127299	-0.00549331	0.00294572	1.11303	0.092706	0.128425	0.000612451	0.00724909	0.00651295	0.115384	0.0832918	1	0.00706437		0.119745	0.0848401	1	1.21165	0.00583037	0.0988278	0.0700204	0.825321	1	0.000205009	0.000288593	0.000306308	0.999348	0.942168		0.942168
224.8	1.11194	0.0861775	0.127422	-0.00556772	0.00272361	1.11363	0.0927275	0.128548	0.000538042	0.00702698	0.00630998	0.115432	0.0832661	1	0.00684422		0.119795	0.084814	1	1.21145	0.0056496	0.0988852	0.0700101	0.825455	1	0.000130596	0.0003382	6.81524e-05	0.999557	4.96241
225	1.07743	0.0831693	0.122928	-0.00543593	0.00240584	1.07912	0.0897193	0.124055	0.000669831	0.0067092	0.00621727	0.114959	0.0831409	1	0.00674366		0.119304	0.0846864	1	1.21073	0.00556989	0.0985383	0.0699464	0.825945	1	-0.000233891	-8.12937e-05	-4.07747e-05	1.00019	1.99373
225.2	1.0552	0.081379	0.120833	-0.00545013	0.00244392	1.05688	0.087929	0.12196	0.000655634	0.00674729	0.00638413	0.115396	0.0831964	1	0.00692464		0.119757	0.084743	1	1.21142	0.00571612	0.0988562	0.0699532	0.825474	1	-8.05891e-05	0.000303226	0.000155174	0.999564	1.95411
225.4	1.05309	0.0812218	0.120325	-0.00557563	0.0022851	1.05478	0.0877718	0.121451	0.000530124	0.00658847	0.00624632	0.115144	0.0832136	1	0.00677517		0.119496	0.0847605	1	1.21103	0.00559454	0.0986729	0.0699903	0.825742	1	-1.93577e-05	8.32862e-05	-6.62612e-06	0.999929	-12.5694
225.6	1.09303	0.0848066	0.125424	-0.00539374	0.00272702	1.09472	0.0913566	0.126551	0.00071202	0.00703038	0.0064221	0.115601	0.0834523	1	0.00696583		0.11997	0.0850037	1	1.21194	0.00574767	0.0989904	0.0701385	0.825123	1	0.000686244	0.000485545	0.000199699	0.999124	2.43138		2.43138
225.8	1.1029	0.0852496	0.126129	-0.00550143	0.00269346	1.10458	0.0917996	0.127255	0.000604325	0.00699682	0.00633435	0.115207	0.0831078	1	0.00687065	0.00686705	0.119561	0.0846527	1	1.21108	0.00567314	0.098722	0.0698983	0.825707	1	-0.00034261	0.00013616	9.67351e-05	0.999862	1.40756			1.66759
226	1.13355	0.088077	0.129683	-0.00546965	0.00273885	1.13524	0.094627	0.130809	0.000636111	0.00704221	0.00620327	0.115226	0.083354	1	0.00672848		0.119581	0.0849035	1	1.21121	0.00555516	0.098728	0.070098	0.825619	1	0.000403783	0.000157483	-5.71402e-05	0.999787	-2.75608
226.2	1.09654	0.084934	0.125149	-0.00542254	0.00260868	1.09823	0.091484	0.126276	0.000683224	0.00691205	0.00629382	0.114981	0.0833014	1	0.00682668		0.119327	0.08485	1	1.211	0.00563721	0.0985355	0.0700658	0.825761	1	0.000249226	-6.37106e-05	4.91113e-05	0.999945	-1.29727
226.4	1.0989	0.0850599	0.125557	-0.00561237	0.00269121	1.10059	0.0916099	0.126683	0.000493387	0.00699458	0.00635532	0.115105	0.0832374	1	0.0068934		0.119455	0.0847848	1	1.21113	0.00569169	0.0986311	0.0700045	0.825673	1	5.13646e-05	4.49674e-05	0.000121337	0.999819	0.3706
226.6	1.11041	0.0861316	0.127162	-0.00544522	0.00289717	1.1121	0.0926816	0.128288	0.000660539	0.00720053	0.00647474	0.115357	0.0833395	1	0.00702292		0.119717	0.0848888	1	1.21163	0.00579627	0.0988066	0.0700617	0.825335	1	0.000350769	0.000265923	0.000261467	0.999375	1.01704		1.01704
226.8	1.12346	0.0871701	0.1287	-0.00556625	0.00278329	1.12515	0.0937202	0.129826	0.000539505	0.00708665	0.00629842	0.115386	0.0832959	1	0.00683168		0.119747	0.0848443	1	1.21142	0.00563938	0.0988482	0.0700369	0.825476	1	0.000221936	0.000297437	5.45742e-05	0.999586	5.45014
227	1.10703	0.0857167	0.126427	-0.00561008	0.00271429	1.10872	0.0922667	0.127554	0.000495681	0.00701765	0.00632952	0.115046	0.0832192	1	0.00686541		0.119394	0.0847662	1	1.21103	0.00566908	0.0985893	0.0699954	0.825746	1	-1.67859e-06	-6.91125e-06	9.10384e-05	0.999916	-0.0759157
227.2	1.13991	0.0885271	0.130595	-0.00532235	0.00313304	1.1416	0.0950771	0.131721	0.000783412	0.00743641	0.00651404	0.115383	0.0832843	1	0.00706555		0.119744	0.0848325	1	1.21164	0.00583139	0.0988281	0.0700145	0.825326	1	0.000182526	0.000288247	0.000307593	0.999353	0.937105		0.937105
227.4	1.12426	0.0872536	0.128502	-0.00549475	0.0028608	1.12595	0.0938036	0.129628	0.000611006	0.00716416	0.00636277	0.115128	0.0833106	1	0.00690148		0.119479	0.0848593	1	1.21124	0.00569786	0.0986419	0.0700599	0.8256	1	0.000271717	6.49883e-05	0.000130073	0.999729	0.499631
227.6	1.14319	0.0887425	0.130488	-0.00548709	0.00284813	1.14488	0.0952925	0.131614	0.000618666	0.00715149	0.00624652	0.114959	0.0832339	1	0.00677538		0.119304	0.0847812	1	1.21086	0.00559551	0.0985285	0.0700173	0.825859	1	4.66485e-05	-8.1664e-05	-6.42537e-06	1.00008	12.7096
227.8	1.13793	0.0883089	0.130114	-0.00558038	0.00287257	1.13962	0.0948589	0.13124	0.000525377	0.00717594	0.00629679	0.115161	0.0832374	1	0.00682991	0.00687409	0.119514	0.0847847	1	1.21113	0.0056393	0.0986797	0.0700048	0.825676	1	5.10126e-05	9.69733e-05	5.26325e-05	0.999836	1.84246			0.977073
228	1.12664	0.087268	0.128634	-0.00550383	0.00293546	1.12833	0.093818	0.12976	0.000601931	0.00723883	0.00641555	0.115002	0.0831479	1	0.00695872		0.119348	0.0846936	1	1.211	0.00574626	0.0985536	0.0699369	0.825763	1	-0.000217862	-4.90061e-05	0.000192039	0.999918	-0.255188		-0.255188
228.2	1.11074	0.086028	0.126895	-0.0055532	0.00282815	1.11242	0.092578	0.128021	0.000552555	0.00713152	0.00641079	0.115083	0.0832218	1	0.00695356		0.119433	0.0847689	1	1.21116	0.00574126	0.0986106	0.0699901	0.825658	1	3.57737e-06	2.35901e-05	0.000186443	0.999789	0.126527		0.126527
228.4	1.15027	0.0894884	0.131879	-0.00543024	0.00295092	1.15196	0.0960385	0.133006	0.000675518	0.00725428	0.00629736	0.115461	0.0833699	1	0.00683053		0.119825	0.0849197	1	1.21157	0.00563773	0.0988998	0.0700904	0.825372	1	0.000443731	0.000364161	5.33427e-05	0.999459	6.82682
228.6	1.15305	0.0895007	0.131948	-0.00537733	0.00296734	1.15474	0.0960507	0.133075	0.000728431	0.00727071	0.00629639	0.115242	0.0831793	1	0.00682947		0.119597	0.0847256	1	1.21115	0.00563882	0.0987467	0.0699545	0.82566	1	-0.000126554	0.000168807	5.21712e-05	0.999814	3.23563
228.8	1.13924	0.0884169	0.130442	-0.00554421	0.00301562	1.14093	0.0949669	0.131568	0.000561549	0.00731899	0.00641493	0.115317	0.0832364	1	0.00695806		0.119675	0.0847837	1	1.21142	0.00574374	0.0987894	0.0699872	0.82548	1	4.15903e-05	0.000231978	0.000191317	0.999565	1.21254		1.21254
229	1.14102	0.0883191	0.130329	-0.00544786	0.00296884	1.14271	0.0948691	0.131455	0.000657897	0.00727221	0.00636398	0.115038	0.0830209	1	0.00690279		0.119385	0.0845642	1	1.21085	0.00570077	0.0985962	0.0698386	0.825864	1	-0.000601659	-1.55877e-05	0.000131519	1.00005	-0.11852
229.2	1.12202	0.0868117	0.128337	-0.00556159	0.0028156	1.12371	0.0933618	0.129463	0.000544167	0.00711896	0.00633524	0.115211	0.0830836	1	0.00687161		0.119565	0.0846281	1	1.21106	0.00567403	0.0987271	0.0698791	0.82572	1	-0.000415817	0.000139701	9.77832e-05	0.999878	1.42868
229.4	1.10586	0.0854242	0.126405	-0.00550148	0.00287266	1.10755	0.0919742	0.127532	0.000604275	0.00717603	0.0064792	0.115148	0.083043	1	0.00702776		0.1195	0.0845867	1	1.21111	0.00580273	0.0986691	0.0698421	0.825686	1	-0.000539922	7.89173e-05	0.000266778	0.999805	0.295816		0.295816
229.6	1.10944	0.0859264	0.127003	-0.00557818	0.0028422	1.11113	0.0924764	0.12813	0.000527576	0.00714557	0.00643091	0.115315	0.0832274	1	0.00697538		0.119673	0.0847746	1	1.21142	0.00575801	0.0987872	0.0699793	0.825475	1	1.419e-05	0.000229746	0.000210062	0.999556	1.0937		1.0937
229.8	1.13116	0.08774	0.129486	-0.0056515	0.00280056	1.13285	0.09429	0.130612	0.000454256	0.00710393	0.00627082	0.115295	0.0832323	1	0.00680175	0.00691096	0.119652	0.0847796	1	1.21123	0.00561555	0.0987855	0.0699944	0.825605	1	3.28487e-05	0.000216992	2.21704e-05	0.999752	9.78747			0.494679
230	1.13268	0.0879616	0.12956	-0.00549013	0.00277287	1.13437	0.0945116	0.130687	0.000615627	0.00707624	0.00623806	0.115207	0.0833167	1	0.0067662		0.119561	0.0848655	1	1.21119	0.0055864	0.0987135	0.0700677	0.825632	1	0.000290744	0.000139563	-1.63135e-05	0.999796	-8.55509
230.2	1.07717	0.0831464	0.122773	-0.00541687	0.00241593	1.07886	0.0896964	0.1239	0.000688884	0.0067193	0.00622814	0.114843	0.0831399	1	0.00675545		0.119183	0.0846854	1	1.21062	0.00558014	0.0984479	0.0699518	0.82602	1	-0.000234295	-0.000185114	-2.80362e-05	1.00028	6.60266
230.4	1.07815	0.0832087	0.123292	-0.00560944	0.00270224	1.07984	0.0897587	0.124419	0.000496318	0.00700561	0.00648765	0.11522	0.0831225	1	0.00703693		0.119575	0.0846677	1	1.21128	0.0058095	0.0987177	0.0698994	0.825573	1	-0.000301645	0.000143257	0.00027668	0.999664	0.517773		0.517773
230.6	1.07264	0.0829077	0.122465	-0.00534589	0.00254793	1.07432	0.0894577	0.123592	0.000759869	0.0068513	0.0063773	0.115041	0.0832688	1	0.00691724		0.119389	0.0848167	1	1.21112	0.00571143	0.0985772	0.0700315	0.82568	1	0.000147239	-1.28434e-05	0.000147133	0.999825	-0.0872914
230.8	1.07399	0.0828048	0.122768	-0.0054861	0.00249105	1.07568	0.0893548	0.123894	0.000619656	0.00679441	0.00631641	0.115178	0.0830686	1	0.0068512		0.119531	0.0846128	1	1.211	0.00565749	0.0987049	0.0698705	0.825767	1	-0.000460094	0.000111266	7.5681e-05	0.999941	1.47019
231	1.09531	0.0848642	0.125251	-0.00553711	0.00256949	1.097	0.0914143	0.126377	0.00056865	0.00687286	0.00626516	0.115203	0.0833314	1	0.0067956		0.119557	0.0848805	1	1.21123	0.00561048	0.0987068	0.0700778	0.825605	1	0.00033465	0.000135087	1.55012e-05	0.999756	8.71463
231.2	1.10575	0.0854171	0.126244	-0.00534076	0.00268529	1.10744	0.0919671	0.12737	0.000764996	0.00698866	0.00631065	0.115013	0.083045	1	0.00684495		0.11936	0.0845888	1	1.21079	0.00565327	0.0985801	0.0698622	0.825904	1	-0.000527139	-3.56026e-05	6.88993e-05	1.00011	-0.516734
231.4	1.11968	0.0868223	0.128196	-0.00543823	0.00271106	1.12137	0.0933723	0.129322	0.000667532	0.00701443	0.00625521	0.115325	0.0832661	1	0.00678481		0.119684	0.084814	1	1.21128	0.00560135	0.0988075	0.07002	0.825571	1	0.000134395	0.000244547	3.85146e-06	0.999714	63.4945
231.6	1.13281	0.0878749	0.129587	-0.00558399	0.00298407	1.1345	0.0944249	0.130713	0.000521767	0.00728743	0.00642347	0.115216	0.0832303	1	0.00696731		0.119571	0.0847775	1	1.21132	0.00575186	0.0987114	0.069988	0.825549	1	2.56087e-05	0.000141838	0.000201329	0.99965	0.70451		0.70451
231.8	1.12057	0.0866912	0.127936	-0.00526914	0.00267115	1.12226	0.0932412	0.129063	0.000836623	0.00697452	0.0062147	0.115002	0.0830834	1	0.00674088	0.00684606	0.119349	0.0846279	1	1.21072	0.00556767	0.0985769	0.0698989	0.825957	1	-0.000408795	-4.23624e-05	-4.37813e-05	1.0002	0.967591			0.611141
232	1.10649	0.0857212	0.126461	-0.00552633	0.00266019	1.10818	0.0922712	0.127587	0.000579427	0.00696356	0.00628377	0.115132	0.0832636	1	0.00681579		0.119483	0.0848114	1	1.21111	0.00562772	0.0986559	0.0700278	0.825688	1	0.000131266	7.11485e-05	3.73408e-05	0.999855	1.90538
232.2	1.13404	0.0881043	0.129627	-0.00548753	0.00278779	1.13573	0.0946543	0.130753	0.000618229	0.00709115	0.00624369	0.115127	0.0833423	1	0.00677232		0.119478	0.0848915	1	1.21114	0.00559168	0.0986492	0.0700921	0.825667	1	0.000369868	6.80481e-05	-9.70958e-06	0.999839	-7.00835
232.4	1.13948	0.0883398	0.130302	-0.00553682	0.00286958	1.14117	0.0948898	0.131428	0.000568943	0.00717295	0.00628561	0.11517	0.0831514	1	0.00681779		0.119523	0.0846971	1	1.21104	0.00562971	0.0986944	0.0699377	0.825738	1	-0.000208905	0.000104915	3.95139e-05	0.999914	2.65514
232.6	1.10556	0.0856205	0.126336	-0.00523976	0.00273157	1.10725	0.0921705	0.127462	0.000865997	0.00703493	0.0063535	0.115116	0.0832425	1	0.00689143		0.119467	0.08479	1	1.21115	0.00568999	0.0986392	0.0700079	0.825663	1	6.64266e-05	5.46953e-05	0.000119202	0.999808	0.458846
232.8	1.08853	0.0840638	0.124157	-0.0055244	0.00274359	1.09022	0.0906138	0.125283	0.00058136	0.00704695	0.00646378	0.114915	0.083115	1	0.00701104		0.119258	0.0846601	1	1.21093	0.0057898	0.0984849	0.0699133	0.825812	1	-0.000316171	-0.00012823	0.00024867	0.999968	-0.515664		-0.515664
233	1.14312	0.0889257	0.130918	-0.00515357	0.00287054	1.14481	0.0954757	0.132044	0.000952191	0.00717391	0.00626648	0.115342	0.083399	1	0.00679703		0.119701	0.0849493	1	1.21145	0.00561067	0.0988085	0.0701222	0.825459	1	0.000535197	0.000259255	1.70778e-05	0.999575	15.1808
233.2	1.12943	0.0875191	0.129386	-0.00559916	0.00279124	1.13112	0.0940691	0.130512	0.000506594	0.0070946	0.00627218	0.115383	0.0831644	1	0.00680322		0.119744	0.0847104	1	1.21126	0.00561666	0.0988591	0.0699359	0.825588	1	-0.000174786	0.000295607	2.37784e-05	0.999729	12.4318
233.4	1.09804	0.0850965	0.125296	-0.00538395	0.00264947	1.09973	0.0916465	0.126423	0.000721813	0.00695283	0.00632233	0.114958	0.0833357	1	0.00685761		0.119303	0.0848849	1	1.21105	0.00566255	0.0985124	0.0700923	0.825733	1	0.000352875	-8.51117e-05	8.25799e-05	0.999904	-1.03066
233.6	1.10678	0.0856895	0.126485	-0.0054878	0.0026544	1.10847	0.0922395	0.127611	0.000617957	0.00695776	0.00627693	0.115124	0.0832137	1	0.00680837		0.119475	0.0847606	1	1.21104	0.0056219	0.0986545	0.0699897	0.825734	1	-1.92547e-05	6.42042e-05	2.9312e-05	0.999912	2.19037
233.8	1.11993	0.0868599	0.128047	-0.00544376	0.00284948	1.12162	0.09341	0.129173	0.000661998	0.00715285	0.00637726	0.115167	0.0832814	1	0.00691719	0.00684918	0.119519	0.0848296	1	1.21127	0.00571071	0.098673	0.0700338	0.825582	1	0.000182114	9.91719e-05	0.000147082	0.999703	0.674261			-0.515664
234	1.12204	0.0869318	0.128272	-0.00552764	0.00271418	1.12373	0.0934818	0.129399	0.000578117	0.00701755	0.00624489	0.115151	0.0831891	1	0.00677362		0.119503	0.0847355	1	1.21101	0.00559335	0.0986805	0.0699708	0.825755	1	-9.37105e-05	8.96963e-05	-8.3025e-06	0.999945	-10.8035
234.2	1.11707	0.0865447	0.12763	-0.00532719	0.00282374	1.11875	0.0930947	0.128757	0.000778569	0.00712711	0.00637058	0.115089	0.0832128	1	0.00690994		0.119439	0.0847597	1	1.21111	0.00570547	0.0986195	0.0699852	0.82569	1	-2.30258e-05	3.02402e-05	0.000139243	0.999837	0.217175
234.4	1.09884	0.0850624	0.12562	-0.00536572	0.00277191	1.10053	0.0916124	0.126746	0.000740035	0.00707528	0.006429	0.115169	0.0832442	1	0.00697331		0.119522	0.0847917	1	1.21129	0.00575695	0.0986733	0.0700013	0.825568	1	6.86587e-05	9.94738e-05	0.000207817	0.999674	0.47866		0.47866
234.6	1.11396	0.0863802	0.127315	-0.00527132	0.00277008	1.11564	0.0929302	0.128442	0.000834441	0.00707345	0.00634023	0.115128	0.0832973	1	0.00687703		0.119479	0.0848458	1	1.2112	0.00567786	0.0986449	0.0700509	0.825626	1	0.000232005	6.5556e-05	0.000103621	0.999766	0.632652
234.8	1.13397	0.0876222	0.129534	-0.00554988	0.00298611	1.13566	0.0941722	0.130661	0.000555884	0.00728948	0.00641874	0.115053	0.0829232	1	0.00696219		0.119401	0.0844647	1	1.21083	0.00574994	0.0986113	0.0697578	0.825881	1	-0.000898522	-3.62667e-06	0.000195828	1.00006	-0.0185197		-0.0185197
235	1.16474	0.0905312	0.133185	-0.00537011	0.0029476	1.16643	0.0970813	0.134312	0.000735649	0.00725096	0.00621639	0.115148	0.0832297	1	0.00674271		0.1195	0.0847769	1	1.21102	0.00556779	0.0986771	0.0700046	0.82575	1	2.97885e-05	8.76618e-05	-4.17582e-05	0.999946	-2.09927
235.2	1.11852	0.086845	0.127563	-0.0053501	0.00285744	1.12021	0.093395	0.12869	0.000755663	0.00716081	0.00639238	0.11488	0.0833727	1	0.00693359		0.119222	0.0849225	1	1.21108	0.00572514	0.0984427	0.0701215	0.825711	1	0.000465025	-0.000157247	0.000164805	0.999863	-0.954139
235.4	1.12276	0.0871595	0.128336	-0.00554533	0.00290219	1.12445	0.0937095	0.129463	0.000560433	0.00720556	0.00640807	0.115134	0.083338	1	0.00695061		0.119486	0.0848872	1	1.21132	0.00573803	0.0986405	0.0700781	0.825543	1	0.000353277	6.91556e-05	0.000183233	0.999649	0.377419		0.377419
235.6	1.12183	0.0868124	0.128216	-0.00545563	0.00276441	1.12352	0.0933624	0.129342	0.000650127	0.00706777	0.00629077	0.115123	0.0830985	1	0.00682338		0.119474	0.0846432	1	1.21094	0.00563477	0.0986619	0.0698988	0.825805	1	-0.000367779	6.2723e-05	4.55584e-05	0.999994	1.37676
235.8	1.09568	0.084999	0.12521	-0.00541834	0.0025722	1.09737	0.091549	0.126336	0.000687416	0.00687556	0.00626549	0.115126	0.0834258	1	0.00679596	0.00687423	0.119477	0.0849766	1	1.21125	0.0056107	0.0986398	0.0701561	0.825593	1	0.000621812	6.67547e-05	1.58767e-05	0.999744	4.20456			0.279186
236	1.05292	0.0812873	0.120588	-0.00546649	0.00249223	1.05461	0.0878373	0.121715	0.000639273	0.0067956	0.0064437	0.115412	0.0832888	1	0.00698925		0.119774	0.0848371	1	1.2116	0.00576861	0.0988559	0.0700207	0.825355	1	0.000196796	0.000315831	0.000225057	0.999404	1.40333		1.40333
236.2	1.01926	0.0785332	0.11647	-0.00536683	0.00228597	1.02094	0.0850833	0.117597	0.000738928	0.00658934	0.00645417	0.115184	0.0833379	1	0.00700061		0.119538	0.0848871	1	1.21143	0.00577882	0.0986752	0.0700721	0.825474	1	0.000350643	0.000112445	0.000237335	0.999553	0.473781		0.473781
236.4	1.05688	0.0815545	0.120476	-0.00553835	0.0023951	1.05857	0.0881045	0.121602	0.000567411	0.00669847	0.00632785	0.114874	0.0832298	1	0.0068636		0.119216	0.084777	1	1.21086	0.00566838	0.0984557	0.0700141	0.825862	1	3.4686e-05	-0.00016043	8.90562e-05	1.00006	-1.80145
236.6	1.05194	0.0814864	0.120076	-0.00544343	0.00239039	1.05363	0.0880364	0.121202	0.000662324	0.00669375	0.00635306	0.115034	0.0835557	1	0.00689095		0.119381	0.085109	1	1.21138	0.00568851	0.0985497	0.0702578	0.825504	1	0.00101476	-1.88121e-05	0.000118648	0.999618	-0.158554
236.8	1.12158	0.0870267	0.128381	-0.00540949	0.0027412	1.12327	0.0935768	0.129508	0.000696269	0.00704457	0.00627151	0.115296	0.0833078	1	0.00680249		0.119653	0.0848564	1	1.21131	0.0056158	0.0987798	0.0700533	0.825551	1	0.000260792	0.000217629	2.29702e-05	0.999687	9.4744
237	1.15183	0.089599	0.132119	-0.00515762	0.00315727	1.15351	0.096149	0.133245	0.000948139	0.00746064	0.00646774	0.115513	0.0833531	1	0.00701534		0.119878	0.0849026	1	1.2118	0.00578921	0.0989261	0.0700634	0.825221	1	0.000387926	0.000404912	0.000253258	0.999234	1.59881		1.59881
237.2	1.13498	0.0878052	0.12979	-0.00534433	0.00291069	1.13667	0.0943552	0.130916	0.000761427	0.00721405	0.00634667	0.115175	0.0830105	1	0.00688402		0.119528	0.0845536	1	1.21097	0.00568473	0.0987049	0.0698233	0.825787	1	-0.000636204	0.000107849	0.000111211	0.999958	0.969769
237.4	1.08428	0.0838598	0.123282	-0.00537338	0.00244868	1.08597	0.0904098	0.124408	0.000732383	0.00675205	0.00621753	0.114559	0.0832526	1	0.00674394		0.118889	0.0848002	1	1.21043	0.00557151	0.0982203	0.0700577	0.82615	1	0.000114003	-0.000438075	-4.05538e-05	1.00045	10.8023
237.6	1.07466	0.083258	0.121553	-0.00527879	0.00247077	1.07635	0.089808	0.122679	0.000826965	0.00677413	0.00629362	0.113977	0.0834376	1	0.00682647		0.118285	0.0849887	1	1.2101	0.00564124	0.097748	0.0702328	0.826378	1	0.000686794	-0.000960909	4.87224e-05	1.00072	-19.7221
237.8	1.10232	0.0854107	0.126037	-0.00538643	0.00285775	1.10401	0.0919607	0.127163	0.000719333	0.00716112	0.00648644	0.115183	0.0832968	1	0.00703562	0.00690523	0.119536	0.0848453	1	1.21142	0.00580776	0.0986747	0.070038	0.825479	1	0.000225969	0.000110246	0.000275223	0.999552	0.400572		0.400572	0.969125
238	1.09052	0.0844321	0.124302	-0.00532966	0.00261632	1.0922	0.0909822	0.125428	0.000776099	0.00691968	0.00633552	0.11484	0.0833014	1	0.00687192		0.11918	0.0848499	1	1.2109	0.00567504	0.0984225	0.0700717	0.825831	1	0.000251799	-0.000191403	9.80576e-05	1.00002	-1.95194
238.2	1.07092	0.0827918	0.122692	-0.00556318	0.00252445	1.07261	0.0893418	0.123819	0.000542577	0.00682781	0.00636561	0.115437	0.0832939	1	0.00690456		0.1198	0.0848423	1	1.21155	0.00569896	0.0988818	0.0700281	0.825391	1	0.000213381	0.000340829	0.000133437	0.999466	2.55423
238.4	1.05953	0.0820222	0.121036	-0.00529805	0.00259914	1.06122	0.0885722	0.122162	0.000807713	0.00690251	0.0065043	0.115114	0.0834624	1	0.00705499		0.119465	0.0850139	1	1.21153	0.00582319	0.0986064	0.0701705	0.8254	1	0.000727603	4.83424e-05	0.000296135	0.999453	0.163244		0.163244
238.6	1.07069	0.0828307	0.122745	-0.00532949	0.00250932	1.07238	0.0893808	0.123871	0.00077627	0.00681268	0.00635285	0.11551	0.0833479	1	0.00689072		0.119876	0.0848973	1	1.21166	0.00568699	0.0989351	0.0700667	0.825311	1	0.000374763	0.000406696	0.000118462	0.999371	3.43314
238.8	1.1066	0.0861085	0.126977	-0.00536907	0.00265988	1.10829	0.0926585	0.128103	0.000736692	0.00696324	0.00628289	0.115587	0.0836052	1	0.00681483		0.119955	0.0851594	1	1.21193	0.00562313	0.0989788	0.0702676	0.82513	1	0.00115118	0.000477021	3.63697e-05	0.999166	13.1159
239	1.09133	0.0844596	0.124984	-0.00537842	0.00260675	1.09302	0.0910097	0.12611	0.000727342	0.00691012	0.00632203	0.115378	0.0832643	1	0.00685729		0.119738	0.0848121	1	1.21141	0.00566059	0.0988422	0.0700112	0.825486	1	0.000126219	0.000289167	8.22847e-05	0.999593	3.51422
239.2	1.12398	0.0871942	0.128646	-0.00533605	0.0027545	1.12567	0.0937442	0.129773	0.000769707	0.00705787	0.00626993	0.115285	0.0832786	1	0.00680078		0.119642	0.0848267	1	1.21127	0.00561459	0.0987741	0.0700313	0.82558	1	0.000173001	0.000208194	2.11194e-05	0.999723	9.85796
239.4	1.08845	0.0840871	0.124113	-0.00534075	0.00266116	1.09014	0.0906371	0.125239	0.000765014	0.00696452	0.00638864	0.114883	0.0831425	1	0.00692953		0.119225	0.084688	1	1.21084	0.0057229	0.0984647	0.0699414	0.825871	1	-0.000230777	-0.000154118	0.000160442	1.00006	-0.960582
239.6	1.09725	0.0850678	0.125583	-0.00542298	0.00267641	1.09894	0.0916179	0.126709	0.000682777	0.00697978	0.00635137	0.115301	0.0833693	1	0.00688911		0.119659	0.084919	1	1.21147	0.00568659	0.0987719	0.070096	0.825446	1	0.000444654	0.000219978	0.0001167	0.99954	1.88498
239.8	1.13641	0.0881917	0.130323	-0.00539967	0.00294298	1.1381	0.0947417	0.131449	0.000706089	0.00724635	0.00636708	0.115499	0.0832458	1	0.00690615	0.00689199	0.119864	0.0847933	1	1.21156	0.00570019	0.0989334	0.0699867	0.82538	1	6.62257e-05	0.000395949	0.000135162	0.99945	2.92945			0.163244
240	1.09993	0.0852159	0.12556	-0.00539577	0.0027336	1.10162	0.091766	0.126686	0.000709987	0.00703697	0.00638783	0.115	0.0833008	1	0.00692866		0.119346	0.0848493	1	1.21112	0.00572085	0.0985416	0.0700583	0.825679	1	0.000244805	-5.01988e-05	0.00015948	0.999823	-0.314765
240.2	1.15555	0.0899471	0.132479	-0.0054379	0.00313754	1.15723	0.0964972	0.133605	0.000667857	0.00744091	0.0064299	0.115452	0.083386	1	0.00697429		0.119816	0.0849361	1	1.21173	0.00575567	0.0988801	0.0700951	0.825269	1	0.000489636	0.000352239	0.000208857	0.999303	1.68651		1.68651
240.4	1.10626	0.0853778	0.126038	-0.00531822	0.00275413	1.10795	0.0919278	0.127165	0.000787536	0.00705749	0.00636986	0.114774	0.082971	1	0.00690916		0.119112	0.0845134	1	1.21053	0.00570753	0.0983964	0.0698149	0.826081	1	-0.000746145	-0.000250829	0.000138404	1.00032	-1.8123
240.6	1.02688	0.0791288	0.117048	-0.00539416	0.00221774	1.02857	0.0856788	0.118174	0.000711595	0.00652111	0.00633996	0.114892	0.0832987	1	0.00687673		0.119234	0.0848472	1	1.21096	0.00567875	0.0984625	0.0700662	0.825793	1	0.000242363	-0.000145195	0.000103273	0.999974	-1.40594
240.8	1.10452	0.0858686	0.126743	-0.005407	0.00268486	1.10621	0.0924186	0.127869	0.000698758	0.00698823	0.00631727	0.115592	0.0835453	1	0.00685213		0.119961	0.0850984	1	1.21191	0.00565398	0.0989846	0.0702184	0.825143	1	0.000969581	0.000480346	7.67081e-05	0.999173	6.262
241	1.00234	0.0770102	0.113894	-0.00556335	0.00197048	1.00403	0.0835602	0.115021	0.000542405	0.00627384	0.00624866	0.114559	0.0832247	1	0.0067777		0.118889	0.0847718	1	1.21044	0.00559938	0.0982194	0.070034	0.826147	1	2.90852e-05	-0.000439612	-3.99125e-06	1.00044	110.144
241.2	1.04667	0.0810717	0.120193	-0.00533833	0.00265201	1.04835	0.0876218	0.121319	0.000767431	0.00695537	0.00663456	0.115723	0.0835803	1	0.00719628		0.120097	0.085134	1	1.21243	0.00593543	0.0990549	0.0702178	0.824792	1	0.00106467	0.000587216	0.000448798	0.998668	1.30842		1.30842
241.4	1.07083	0.0825376	0.122418	-0.00545227	0.00279154	1.07252	0.0890877	0.123544	0.000653488	0.00709491	0.00661519	0.115191	0.083064	1	0.00717526		0.119544	0.0846081	1	1.21133	0.00592347	0.0986885	0.0698474	0.825541	1	-0.000480422	0.000112864	0.000426361	0.999594	0.264716		0.264716
241.6	1.0435	0.08042	0.119362	-0.005498	0.00223534	1.04519	0.08697	0.120489	0.000607758	0.00653871	0.00625602	0.11528	0.08321	1	0.00678569		0.119637	0.0847569	1	1.21118	0.00560255	0.0987769	0.0699788	0.825642	1	-3.38206e-05	0.000203854	4.79081e-06	0.999801	42.5511
241.8	1.04661	0.0807726	0.11944	-0.00558469	0.0025211	1.0483	0.0873226	0.120567	0.000521067	0.00682446	0.00651004	0.115012	0.0832994	1	0.00706121	0.00695371	0.119358	0.0848479	1	1.21127	0.00582961	0.0985401	0.0700488	0.825581	1	0.000237637	-4.34238e-05	0.000302918	0.999674	-0.143351		-0.143351	0.779073
242	1.03383	0.0796708	0.118085	-0.00533273	0.00211491	1.03552	0.0862208	0.119211	0.000773031	0.00641828	0.00619813	0.115122	0.0832635	1	0.0067229		0.119473	0.0848113	1	1.21101	0.00555149	0.098656	0.0700337	0.825759	1	0.000132849	6.51346e-05	-6.32058e-05	0.999961	-1.03052
242.2	1.06445	0.0822265	0.121799	-0.00535922	0.00238877	1.06614	0.0887765	0.122926	0.000746543	0.00669214	0.006277	0.1153	0.0832694	1	0.00680845		0.119658	0.0848173	1	1.21128	0.00562085	0.098786	0.0700227	0.82557	1	0.000144601	0.000221593	2.94249e-05	0.999709	7.5308
242.4	1.10552	0.0857507	0.126765	-0.00528709	0.00277628	1.10721	0.0923007	0.127891	0.000818667	0.00707965	0.00639412	0.115507	0.0833632	1	0.00693549		0.119873	0.0849129	1	1.21172	0.00572366	0.0989277	0.0700763	0.825272	1	0.000420208	0.000402516	0.000166884	0.999314	2.41194
242.6	1.08515	0.0839297	0.123853	-0.00527892	0.00247412	1.08684	0.0904797	0.124979	0.000826842	0.00677749	0.00623596	0.114993	0.0832503	1	0.00676393		0.119339	0.0847979	1	1.2109	0.00558586	0.0985538	0.0700287	0.825832	1	9.54827e-05	-5.14988e-05	-1.88215e-05	1.00004	2.73618
242.8	1.08587	0.0839377	0.123886	-0.00530108	0.00244902	1.08755	0.0904877	0.125012	0.000804677	0.00675238	0.00620878	0.114948	0.0832029	1	0.00673444		0.119292	0.0847496	1	1.21078	0.00556209	0.0985253	0.0699961	0.825916	1	-4.59189e-05	-9.08879e-05	-5.07514e-05	1.00015	1.79084
243	1.10457	0.0855259	0.1264	-0.00519149	0.00280281	1.10626	0.0920759	0.127526	0.00091427	0.00710618	0.00642359	0.115277	0.0832316	1	0.00696745		0.119634	0.0847788	1	1.21138	0.00575166	0.0987581	0.0699853	0.825505	1	2.78436e-05	0.000195969	0.000201478	0.999595	0.972656		0.972656
243.2	1.20932	0.094837	0.138944	-0.00530748	0.00341531	1.21101	0.101387	0.140071	0.000798282	0.00771867	0.00637376	0.115665	0.0837212	1	0.0069134		0.120036	0.0852775	1	1.21223	0.00570306	0.0990211	0.0703478	0.824928	1	0.00149724	0.000543314	0.00014296	0.998897	3.80045
243.4	1.19137	0.0927941	0.136564	-0.005426	0.00325541	1.19306	0.0993441	0.137691	0.000679755	0.00755877	0.00633564	0.11541	0.0832687	1	0.00687205		0.119772	0.0848166	1	1.21146	0.00567253	0.0988657	0.0700118	0.82545	1	0.00013832	0.00031776	9.82624e-05	0.999545	3.23379
243.6	1.14749	0.0890446	0.130863	-0.0054369	0.00303464	1.14918	0.0955947	0.131989	0.000668855	0.00733801	0.00638543	0.114855	0.0831851	1	0.00692606		0.119196	0.0847315	1	1.21085	0.00571998	0.0984395	0.0699767	0.825864	1	-0.000101025	-0.000179401	0.000156676	1.00005	-1.14505
243.8	1.12626	0.087405	0.128852	-0.0051675	0.0028197	1.12795	0.093955	0.129978	0.00093826	0.00712307	0.00631505	0.115233	0.083297	1	0.00684971	0.00684939	0.119589	0.0848455	1	1.21128	0.00565492	0.0987288	0.0700459	0.82557	1	0.000228943	0.000160787	7.40709e-05	0.999701	2.17072			0.972656
244	1.10438	0.0854708	0.126003	-0.0053548	0.00288975	1.10607	0.0920208	0.12713	0.000750961	0.00719312	0.00650332	0.114938	0.0831963	1	0.00705393		0.119282	0.0847429	1	1.21108	0.0058245	0.0984927	0.069973	0.82571	1	-7.18476e-05	-0.000108618	0.000295065	0.999834	-0.368117		-0.368117
244.2	1.12932	0.0877697	0.129623	-0.00546154	0.00277505	1.13101	0.0943198	0.13075	0.000644224	0.00707842	0.00625851	0.115605	0.0833945	1	0.00678839		0.119974	0.0849448	1	1.21171	0.00560234	0.0990123	0.0701034	0.825282	1	0.000515154	0.000493797	7.7732e-06	0.999355	63.5256
244.4	1.08175	0.0835541	0.123228	-0.00531429	0.002644	1.08344	0.0901041	0.124354	0.000791465	0.00694737	0.00641233	0.114777	0.0831649	1	0.00695523		0.119115	0.0847109	1	1.21078	0.00574441	0.0983785	0.0699638	0.825913	1	-0.000160793	-0.00025003	0.00018825	1.00011	-1.32818		-1.32818
244.6	1.05289	0.0812224	0.120608	-0.00533523	0.00214614	1.05458	0.0877724	0.121734	0.000770524	0.00644951	0.00611571	0.115434	0.0832298	1	0.0066335		0.119797	0.084777	1	1.21121	0.00547677	0.098907	0.0699938	0.825622	1	2.48459e-05	0.000346291	-0.000159888	0.999807	-2.16584
244.8	1.10273	0.0857325	0.126457	-0.00523054	0.00277714	1.10442	0.0922825	0.127583	0.00087522	0.00708051	0.00641106	0.11552	0.0835574	1	0.00695385		0.119886	0.0851106	1	1.21195	0.00573774	0.09892	0.0702262	0.825116	1	0.00100571	0.000413423	0.000186723	0.99912	2.2141		2.2141
245	1.00715	0.0773602	0.114462	-0.00544735	0.00215786	1.00883	0.0839102	0.115588	0.000658407	0.00646123	0.00640464	0.114576	0.0831754	1	0.0069469		0.118906	0.0847216	1	1.21057	0.00573851	0.0982228	0.0699846	0.826054	1	-0.000123812	-0.00042953	0.000179223	1.00028	-2.39662		-2.39662
245.2	1.03183	0.079514	0.118183	-0.00532277	0.00224313	1.03352	0.086064	0.11931	0.000782992	0.0065465	0.00633416	0.11544	0.0832725	1	0.00687045		0.119803	0.0848205	1	1.21149	0.00567106	0.0988884	0.0700132	0.825427	1	0.000149256	0.000344243	9.65312e-05	0.999518	3.56613
245.4	1.08513	0.0839513	0.124455	-0.00525259	0.00251044	1.08682	0.0905013	0.125581	0.000853173	0.0068138	0.00626947	0.115549	0.0832713	1	0.00680027		0.119916	0.0848193	1	1.21154	0.00561294	0.0989785	0.0700098	0.825399	1	0.000144278	0.000443724	2.06191e-05	0.999495	21.5201
245.6	1.14792	0.0894334	0.131663	-0.00520568	0.0030172	1.14961	0.0959834	0.13279	0.000900078	0.00732057	0.0063679	0.115509	0.0834925	1	0.00690704		0.119874	0.0850446	1	1.21183	0.00569969	0.0989205	0.0701789	0.825201	1	0.000811139	0.000404703	0.000136098	0.999233	2.97362
245.8	1.06946	0.0825761	0.12217	-0.00540335	0.0025428	1.07115	0.0891261	0.123297	0.000702412	0.00684617	0.00639141	0.115107	0.0832059	1	0.00693254	0.00688421	0.119457	0.0847527	1	1.21114	0.00572397	0.0986317	0.0699775	0.825667	1	-4.47296e-05	4.51531e-05	0.000163698	0.999804	0.275832			-0.469705
246	1.1173	0.0870066	0.127755	-0.00476974	0.00276203	1.11899	0.0935566	0.128881	0.00133602	0.0070654	0.0063141	0.115177	0.0836083	1	0.00684868		0.11953	0.0851625	1	1.21154	0.00565287	0.0986594	0.0702927	0.825395	1	0.00117069	0.00011026	7.29287e-05	0.999491	1.51189
246.2	1.07056	0.0826875	0.12194	-0.00529997	0.00227128	1.07225	0.0892375	0.123066	0.000805793	0.00657465	0.00613164	0.114774	0.0832245	1	0.00665077		0.119112	0.0847716	1	1.21053	0.00549408	0.098396	0.0700282	0.826082	1	2.52739e-05	-0.000243749	-0.000141401	1.00038	1.72381
246.4	1.01434	0.0779875	0.115696	-0.00515651	0.00223231	1.01603	0.0845375	0.116822	0.000949246	0.00653568	0.00643257	0.114979	0.0832039	1	0.00697719		0.119324	0.0847506	1	1.21105	0.00576126	0.0985296	0.0699809	0.825728	1	-4.85658e-05	-7.01962e-05	0.000212016	0.999872	-0.331089		-0.331089
246.6	1.01495	0.07802	0.116058	-0.00540983	0.00203904	1.01664	0.08457	0.117185	0.00069593	0.0063424	0.00623858	0.115266	0.0831855	1	0.00676677		0.119623	0.0847319	1	1.21112	0.00558719	0.0987702	0.0699615	0.825681	1	-0.000107144	0.000192601	-1.56905e-05	0.999853	-12.275
246.8	1.04423	0.0805866	0.119346	-0.00524194	0.00219552	1.04592	0.0871366	0.120472	0.00086382	0.00649888	0.00621356	0.115183	0.083311	1	0.00673963		0.119536	0.0848597	1	1.21114	0.00556472	0.0986978	0.0700662	0.825671	1	0.000274655	0.000119092	-4.50769e-05	0.99985	-2.64198
247	0.975337	0.0746201	0.111203	-0.00536913	0.00182537	0.977025	0.0811701	0.112329	0.000736629	0.00612873	0.00627285	0.114971	0.0830788	1	0.00680394		0.119316	0.0846232	1	1.21074	0.00561964	0.0985478	0.0698936	0.825939	1	-0.000422917	-7.23618e-05	2.4496e-05	1.00017	-2.95402
247.2	0.96514	0.0739939	0.110089	-0.00544069	0.00176571	0.966829	0.0805439	0.111215	0.00066507	0.00606908	0.0062773	0.115031	0.0833073	1	0.00680877		0.119379	0.084856	1	1.21104	0.00562224	0.0985751	0.0700685	0.825734	1	0.000266088	-1.85666e-05	2.97298e-05	0.999915	-0.624511
247.4	0.971303	0.0743787	0.110978	-0.0053539	0.00183567	0.972992	0.0809287	0.112104	0.000751856	0.00613904	0.00630945	0.115216	0.0831751	1	0.00684364		0.11957	0.0847213	1	1.21114	0.0056506	0.0987259	0.069952	0.825672	1	-0.000138808	0.000145288	6.75003e-05	0.999826	2.15241
247.6	0.930852	0.0711515	0.106367	-0.00537883	0.0016865	0.932541	0.0777015	0.107493	0.000726931	0.00598987	0.00642317	0.115269	0.0833224	1	0.00696699		0.119625	0.0848713	1	1.21146	0.00575088	0.0987445	0.0700568	0.825448	1	0.000302302	0.000188927	0.00020096	0.999526	0.940121		0.940121
247.8	0.940232	0.0719674	0.107753	-0.00532207	0.00176696	0.94192	0.0785174	0.108879	0.000783691	0.00607033	0.00644463	0.115593	0.0833589	1	0.00699027	0.00683966	0.119962	0.0849085	1	1.21186	0.00576821	0.0989897	0.0700645	0.825178	1	0.000403727	0.000477345	0.000226137	0.999184	2.11086		2.11086	0.906631
248	0.954003	0.0729974	0.108979	-0.00511596	0.00178963	0.955692	0.0795474	0.110105	0.000989795	0.006093	0.00637549	0.11521	0.0832354	1	0.00691527		0.119564	0.0847827	1	1.21126	0.00570914	0.0987101	0.0699954	0.825585	1	4.22117e-05	0.000137468	0.000145012	0.999706	0.947972
248.2	0.896937	0.0681917	0.102118	-0.00544082	0.00141756	0.898626	0.0747417	0.103244	0.000664939	0.00572093	0.00636631	0.114891	0.0831734	1	0.00690532		0.119233	0.0847195	1	1.21086	0.00570283	0.0984702	0.0699665	0.82586	1	-0.000137136	-0.000146434	0.000134225	1.00005	-1.09096
248.4	0.899008	0.0686094	0.102739	-0.0053325	0.00136659	0.900697	0.0751594	0.103865	0.000773258	0.00566996	0.00629508	0.115317	0.0834459	1	0.00682806		0.119675	0.0849971	1	1.2115	0.00563604	0.0987825	0.0701586	0.825423	1	0.000676949	0.000235686	5.06408e-05	0.999525	4.65408
248.6	0.914641	0.0699127	0.104569	-0.00538587	0.00157929	0.91633	0.0764627	0.105696	0.000719893	0.00588266	0.0064198	0.115347	0.0834445	1	0.00696334		0.119706	0.0849957	1	1.21167	0.00574692	0.0987947	0.0701479	0.82531	1	0.000669354	0.000258421	0.000196998	0.999358	1.3118		1.3118
248.8	0.909065	0.0692686	0.104013	-0.00523948	0.00154937	0.910754	0.0758186	0.105139	0.000866281	0.00585274	0.00642626	0.115442	0.0832482	1	0.00697034		0.119805	0.0847957	1	1.21157	0.00575314	0.0988843	0.0699882	0.825374	1	7.3768e-05	0.000343546	0.000204603	0.999431	1.67909		1.67909
249	0.922695	0.0704783	0.105471	-0.00496835	0.00138785	0.924383	0.0770283	0.106597	0.00113741	0.00569122	0.00615678	0.115317	0.0833294	1	0.00667804		0.119675	0.0848785	1	1.21123	0.00551343	0.0988044	0.0700762	0.825606	1	0.000328068	0.000240191	-0.000111706	0.99978	-2.15021
249.2	0.908188	0.0693013	0.1036	-0.00482963	0.00152426	0.909877	0.0758513	0.104726	0.00127612	0.00582763	0.00640485	0.1151	0.0833643	1	0.00694712		0.11945	0.084914	1	1.21131	0.00573521	0.0986119	0.070101	0.825552	1	0.000433864	3.83454e-05	0.000179459	0.999661	0.213672		0.213672
249.4	0.892597	0.0679076	0.101739	-0.00531231	0.00133883	0.894285	0.0744576	0.102866	0.000793452	0.0056422	0.00630917	0.115025	0.0832593	1	0.00684334		0.119373	0.0848071	1	1.21102	0.00565087	0.0985718	0.0700293	0.825748	1	0.00012047	-2.47092e-05	6.71431e-05	0.999924	-0.368009
249.6	0.863283	0.0653425	0.0986936	-0.00543723	0.000961069	0.864972	0.0718926	0.0998199	0.000668525	0.00526444	0.00608625	0.115402	0.0831155	1	0.00660154		0.119764	0.0846606	1	1.21103	0.0054512	0.0988946	0.0699081	0.825746	1	-0.000319125	0.000318982	-0.000194512	0.999964	-1.63991
249.8	0.877066	0.0667614	0.100141	-0.00529198	0.00137014	0.878755	0.0733114	0.101267	0.000813776	0.00567351	0.0064563	0.115239	0.0834265	1	0.00700293	0.00686553	0.119595	0.0849773	1	1.21157	0.00578002	0.09871	0.0701379	0.825372	1	0.000616867	0.00016131	0.000239827	0.999427	0.67261		0.67261	0.969292
250	0.858501	0.065245	0.0979174	-0.00533456	0.000927701	0.86019	0.071795	0.0990437	0.000771198	0.00523107	0.0060813	0.115142	0.0834641	1	0.00659617		0.119493	0.0850157	1	1.21111	0.00544641	0.0986648	0.0701968	0.825692	1	0.000741262	8.63732e-05	-0.000200365	0.999908	-0.431079
250.2	0.850669	0.0647435	0.0971696	-0.00521817	0.0012404	0.852358	0.0712935	0.0982959	0.000887593	0.00554376	0.00650403	0.115322	0.0836427	1	0.0070547		0.119681	0.0851976	1	1.21193	0.00582103	0.098752	0.0702989	0.825128	1	0.00126659	0.00023393	0.000295766	0.999118	0.790929		0.790929
250.4	0.861946	0.065539	0.098802	-0.00522407	0.00107656	0.863635	0.072089	0.0999283	0.000881693	0.00537992	0.0062294	0.115707	0.0834717	1	0.00675681		0.12008	0.0850234	1	1.21186	0.00557557	0.0990871	0.0701594	0.825178	1	0.000746093	0.000585601	-2.63666e-05	0.999233	-22.21
250.6	0.835065	0.0630912	0.0951215	-0.00513699	0.000960653	0.836753	0.0696412	0.0962478	0.000968768	0.00526402	0.006291	0.115025	0.0832279	1	0.00682363		0.119373	0.0847751	1	1.21097	0.00563484	0.0985759	0.0700058	0.825783	1	2.58515e-05	-2.4254e-05	4.58188e-05	0.999971	-0.529347
250.8	0.885589	0.0676584	0.101176	-0.00502219	0.00142295	0.887278	0.0742084	0.102302	0.00108357	0.00572632	0.00645381	0.115299	0.0836361	1	0.00700022		0.119656	0.0851908	1	1.21185	0.00577649	0.0987388	0.0702983	0.825186	1	0.0012483	0.000214488	0.000236853	0.999201	0.905576		0.905576
251	0.879202	0.0672004	0.100142	-0.00501422	0.00127359	0.880891	0.0737504	0.101269	0.00109154	0.00557696	0.00633105	0.114962	0.0837225	1	0.00686707		0.119307	0.0852789	1	1.21145	0.00566846	0.0984823	0.0703939	0.825455	1	0.00152104	-8.22311e-05	9.27863e-05	0.999566	-0.886241
251.2	0.865821	0.0656741	0.0984802	-0.00516697	0.00118495	0.86751	0.0722241	0.0996065	0.000938793	0.00548832	0.00632652	0.114819	0.0832545	1	0.00686216		0.119158	0.0848022	1	1.21082	0.00566735	0.098411	0.0700368	0.825885	1	0.000110795	-0.000209791	8.74925e-05	1.00009	-2.39782
251.4	0.870031	0.0664246	0.0994244	-0.00520627	0.00125416	0.87172	0.0729746	0.100551	0.000899486	0.00555753	0.00637536	0.115348	0.0837134	1	0.00691513		0.119707	0.0852696	1	1.21189	0.00570607	0.098777	0.0703607	0.825156	1	0.00148222	0.000260525	0.000144818	0.999182	1.79898
251.6	0.862112	0.0654894	0.0984852	-0.00507715	0.00126286	0.863801	0.0720394	0.0996115	0.00102861	0.00556623	0.00644388	0.115318	0.0833981	1	0.00698945		0.119676	0.0849484	1	1.21161	0.00576871	0.098774	0.0701118	0.825345	1	0.000529402	0.000231741	0.000225254	0.999396	1.0288		1.0288
251.8	0.855041	0.0650621	0.0974812	-0.0051146	0.00108817	0.85673	0.0716121	0.0986075	0.000991159	0.00539154	0.00629316	0.115098	0.0835877	1	0.00682597	0.00686913	0.119448	0.0851416	1	1.21142	0.00563471	0.0986017	0.0702828	0.825481	1	0.00111117	4.0153e-05	4.83477e-05	0.999602	0.830504			0.908435
252	0.811305	0.0612543	0.0920754	-0.00497352	0.000961297	0.812993	0.0678043	0.0932017	0.00113224	0.00526466	0.00647565	0.11464	0.0834009	1	0.00702392		0.118973	0.0849513	1	1.21095	0.00580035	0.0982478	0.0701527	0.825799	1	0.000554636	-0.000374041	0.000262558	0.999957	-1.4246		-1.4246
252.2	0.767762	0.0576223	0.0873923	-0.00498036	0.000526256	0.76945	0.0641723	0.0885186	0.0011254	0.00482962	0.00627672	0.115041	0.0834002	1	0.00680814		0.119389	0.0849505	1	1.21115	0.00562123	0.0985753	0.0701405	0.825663	1	0.000546345	-9.46513e-06	2.90419e-05	0.999828	-0.325913
252.4	0.742389	0.0556717	0.0846029	-0.00493679	0.000295063	0.744078	0.0622217	0.0857292	0.00116897	0.00459843	0.00618004	0.115215	0.0836225	1	0.00670328		0.11957	0.0851771	1	1.21145	0.00553326	0.0986998	0.07031	0.825457	1	0.0012157	0.000148974	-8.44003e-05	0.999597	-1.76509
252.6	0.757484	0.0569223	0.0863979	-0.00525076	0.000315665	0.759173	0.0634723	0.0875242	0.000854997	0.00461903	0.00608429	0.115289	0.0836072	1	0.00659942		0.119646	0.0851614	1	1.21141	0.00544773	0.0987662	0.0702996	0.825486	1	0.00116949	0.000217567	-0.000196769	0.999654	-1.1057
252.8	0.800647	0.0608263	0.091666	-0.00481631	0.0009014	0.802335	0.0673763	0.0927923	0.00128945	0.00520477	0.00648702	0.115653	0.0839753	1	0.00703625		0.120024	0.0855364	1	1.2126	0.00580263	0.0989808	0.0705398	0.824677	1	0.00226169	0.000528957	0.00027572	0.998566	1.91846		1.91846
253	0.834642	0.0632889	0.0952275	-0.00486647	0.000918689	0.836331	0.0698389	0.0963538	0.00123929	0.00522206	0.00624401	0.11521	0.0835064	1	0.00677266		0.119564	0.0850587	1	1.2114	0.00559079	0.0986997	0.0702155	0.825494	1	0.000863544	0.000142241	-9.32351e-06	0.999627	-15.2562
253.2	0.818269	0.0622346	0.0934302	-0.00482011	0.00101314	0.819958	0.0687847	0.0945565	0.00128565	0.0053165	0.00648388	0.115319	0.0838881	1	0.00703284		0.119677	0.0854475	1	1.21216	0.00580192	0.0987307	0.0704921	0.824975	1	0.00200767	0.000231382	0.000272068	0.998938	0.850456		0.850456
253.4	0.863732	0.0658064	0.0986431	-0.00486999	0.00118689	0.865421	0.0723564	0.0997694	0.00123577	0.00549026	0.00634403	0.115284	0.0836083	1	0.00688115		0.119641	0.0851626	1	1.21169	0.00567899	0.0987397	0.0702844	0.825297	1	0.00116736	0.000205171	0.000108068	0.999362	1.89854
253.6	0.827376	0.0626409	0.0943118	-0.00476095	0.00091571	0.829065	0.0691909	0.0954381	0.00134481	0.00521908	0.00629514	0.115115	0.0834566	1	0.00682812		0.119466	0.085008	1	1.2113	0.00563701	0.0986261	0.070179	0.825558	1	0.00071442	5.59575e-05	5.06754e-05	0.999695	1.10423
253.8	0.822946	0.062506	0.0936641	-0.00458164	0.000949072	0.824635	0.0690561	0.0947904	0.00152411	0.00525244	0.00636941	0.114948	0.0837414	1	0.00690868	0.00685944	0.119293	0.0852981	1	1.2115	0.00570259	0.098467	0.070407	0.825423	1	0.00157747	-9.55097e-05	0.000137804	0.999519	-0.693081			0.448104
254	0.818597	0.0620144	0.0933338	-0.0046989	0.000828887	0.820286	0.0685645	0.0944601	0.00140686	0.00513225	0.00625667	0.115155	0.0835861	1	0.00678639		0.119507	0.0851399	1	1.21143	0.00560195	0.0986495	0.0702803	0.825468	1	0.00110549	9.265e-05	5.52351e-06	0.999594	16.7737
254.2	0.847739	0.0645611	0.0967157	-0.00454245	0.00104126	0.849427	0.0711111	0.097842	0.00156331	0.00534463	0.00629204	0.115186	0.0837166	1	0.00682475		0.119539	0.0852728	1	1.21164	0.00563267	0.0986592	0.0703782	0.82533	1	0.00149788	0.000118898	4.70356e-05	0.999417	2.52784
254.4	0.810967	0.0610641	0.0922777	-0.00483878	0.000921418	0.812656	0.0676142	0.0934039	0.00126698	0.00522478	0.00642927	0.114937	0.0832015	1	0.00697361		0.119281	0.0847482	1	1.211	0.00575854	0.0984974	0.0699818	0.825762	1	-5.45975e-05	-0.000107846	0.000208142	0.999915	-0.518138		-0.518138
254.6	0.821725	0.0624713	0.093837	-0.00447507	0.000867333	0.823414	0.0690213	0.0949633	0.00163069	0.0051707	0.00627958	0.115329	0.0838233	1	0.00681125		0.119687	0.0853816	1	1.21188	0.0056204	0.0987618	0.0704538	0.825164	1	0.0018167	0.000246786	3.24442e-05	0.999215	7.60648
254.8	0.806646	0.0609241	0.0918344	-0.00455522	0.000773213	0.808334	0.0674741	0.0929607	0.00155054	0.00507658	0.0062803	0.115003	0.0834731	1	0.00681202		0.119349	0.0850248	1	1.21119	0.00562426	0.0985391	0.0701996	0.825637	1	0.000767556	-4.40654e-05	3.32371e-05	0.999797	-1.32579
255	0.830267	0.0632383	0.0947433	-0.00439109	0.000902068	0.831955	0.0697883	0.0958696	0.00171467	0.00520543	0.00625687	0.115234	0.0838847	1	0.00678661		0.119589	0.0854441	1	1.21182	0.00560034	0.0986857	0.0705089	0.825205	1	0.00200503	0.000163112	5.77259e-06	0.999273	28.2563
255.2	0.818662	0.0620168	0.0932607	-0.00457434	0.000930944	0.820351	0.0685668	0.094387	0.00153142	0.00523431	0.00638057	0.115057	0.0835823	1	0.00692079		0.119405	0.085136	1	1.21146	0.00571276	0.098563	0.0702755	0.825449	1	0.00109388	1.00095e-06	0.000150931	0.999544	0.0066318
255.4	0.770833	0.0581724	0.0878555	-0.00450393	0.00065643	0.772522	0.0647224	0.0889818	0.00160182	0.0049598	0.00642026	0.115183	0.0837807	1	0.00696384		0.119537	0.0853381	1	1.21184	0.00574651	0.0986408	0.0704203	0.825192	1	0.00168859	0.000112727	0.000197478	0.99922	0.570833		0.570833
255.6	0.734229	0.0550576	0.0837416	-0.00467416	0.000545767	0.735918	0.0616076	0.0848679	0.0014316	0.00484913	0.00658923	0.115323	0.0837154	1	0.00714711		0.119681	0.0852716	1	1.2121	0.00589647	0.0987386	0.0703503	0.825015	1	0.00148404	0.000231401	0.00039567	0.99896	0.584834		0.584834
255.8	0.715729	0.0536799	0.0814593	-0.00460877	0.000225975	0.717418	0.0602299	0.0825856	0.00149699	0.00452934	0.00631339	0.115115	0.0839538	1	0.00684792	0.00688743	0.119466	0.0855144	1	1.21183	0.0056509	0.0985831	0.0705665	0.8252	1	0.00221545	5.50861e-05	7.20717e-05	0.999256	0.764323			0.212509
256	0.73051	0.0548003	0.0835442	-0.00437637	0.000413652	0.732198	0.0613503	0.0846705	0.00172939	0.00471702	0.00644227	0.115639	0.0837891	1	0.00698771		0.120009	0.0853467	1	1.21234	0.0057638	0.0989894	0.0703981	0.824849	1	0.00170149	0.000517978	0.000223288	0.998785	2.31977		2.31977
256.2	0.750453	0.0560627	0.0853595	-0.00462919	0.000417103	0.752142	0.0626127	0.0864858	0.00147657	0.00472047	0.00627604	0.114986	0.0832459	1	0.0068074		0.119332	0.0847934	1	1.21093	0.00562162	0.0985454	0.0700232	0.82581	1	8.14809e-05	-5.885e-05	2.82366e-05	1.00001	-2.08417
256.4	0.719638	0.0542098	0.0819314	-0.0043698	0.000374277	0.721326	0.0607598	0.0830577	0.00173596	0.00467764	0.00648478	0.115146	0.0842334	1	0.00703382		0.119498	0.0857993	1	1.21233	0.0058019	0.0985686	0.0707722	0.824857	1	0.00305447	7.70939e-05	0.000273059	0.9988	0.282334		0.282334
256.6	0.730116	0.0548093	0.0835551	-0.00453309	0.000282099	0.731805	0.0613593	0.0846814	0.00157267	0.00458546	0.00626597	0.115716	0.0838466	1	0.00679648		0.120089	0.0854052	1	1.21229	0.00560631	0.0990597	0.0704495	0.824885	1	0.0018767	0.00059238	1.65333e-05	0.998869	35.8295
256.8	0.751433	0.0567555	0.0855987	-0.00453504	0.000515401	0.753121	0.0633055	0.086725	0.00157072	0.00481877	0.00639839	0.115154	0.0840576	1	0.00694012		0.119506	0.0856201	1	1.21207	0.00572586	0.0985971	0.0706398	0.825037	1	0.00252563	8.72054e-05	0.00017178	0.999038	0.507657		0.507657
257	0.727637	0.0546581	0.082904	-0.00463886	0.000374727	0.729325	0.0612082	0.0840303	0.0014669	0.00467809	0.00641428	0.115216	0.0839244	1	0.00695734		0.119571	0.0854845	1	1.21201	0.00574032	0.0986549	0.070531	0.825074	1	0.00212166	0.000142344	0.000190432	0.999077	0.747482		0.747482
257.2	0.733045	0.0550482	0.0835546	-0.00436144	0.000320307	0.734734	0.0615982	0.0846809	0.00174431	0.00462367	0.00629299	0.115254	0.0838375	1	0.00682579		0.11961	0.085396	1	1.21183	0.00563263	0.0987017	0.0704685	0.825197	1	0.00186112	0.000179586	4.81645e-05	0.999254	3.72861
257.4	0.718512	0.0538302	0.0817783	-0.00439198	0.000429122	0.7202	0.0603802	0.0829046	0.00171378	0.00473249	0.00657107	0.115113	0.083838	1	0.00712741		0.119464	0.0853965	1	1.21199	0.00588076	0.0985685	0.0704599	0.825091	1	0.00186021	4.52399e-05	0.000374361	0.999063	0.120846		0.120846
257.6	0.709125	0.0532605	0.0806845	-0.00456214	8.09016e-05	0.710814	0.0598105	0.0818108	0.00154362	0.00438427	0.00616796	0.115095	0.0841437	1	0.00669017		0.119444	0.0857079	1	1.21184	0.00552066	0.0985643	0.0707252	0.82519	1	0.0027925	4.14175e-05	-9.85731e-05	0.99928	-0.42017
257.8	0.692949	0.0518449	0.0788763	-0.00453393	0.000142273	0.694638	0.0583949	0.0800026	0.00157183	0.00444564	0.00639994	0.115172	0.0840652	1	0.00694179	0.0069108	0.119524	0.0856279	1	1.21209	0.0057271	0.0986098	0.0706446	0.825018	1	0.00254821	0.00010273	0.000173587	0.999015	0.591804		0.591804	0.761649
258	0.735985	0.0553268	0.0840503	-0.00425195	0.000408539	0.737674	0.0618768	0.0851766	0.00185381	0.00471191	0.00638752	0.115466	0.0838809	1	0.00692832		0.11983	0.0854402	1	1.2122	0.0057155	0.0988538	0.0704837	0.824947	1	0.0019843	0.000366157	0.00015906	0.998923	2.30201
258.2	0.714426	0.053399	0.0811534	-0.00435276	0.00028599	0.716115	0.059949	0.0822797	0.001753	0.00458936	0.00640869	0.114897	0.0837142	1	0.00695128		0.11924	0.0852704	1	1.21146	0.00573793	0.0984264	0.0703864	0.825449	1	0.00149595	-0.000142183	0.000183898	0.999542	-0.773165		-0.773165
258.4	0.673014	0.0500292	0.0764983	-0.0045498	-4.34728e-05	0.674703	0.0565792	0.0776246	0.00155596	0.00425989	0.00631373	0.11505	0.0838579	1	0.00684828		0.119398	0.0854168	1	1.21166	0.00565197	0.0985408	0.0704955	0.825312	1	0.00192772	-2.95702e-06	7.24659e-05	0.999394	-0.0408057
258.6	0.669722	0.0499239	0.0761476	-0.00449095	-0.000159495	0.671411	0.0564739	0.0772739	0.00161481	0.00414387	0.00617189	0.115092	0.0841124	1	0.00669443		0.119442	0.085676	1	1.21181	0.00552432	0.0985645	0.0707007	0.82521	1	0.00269813	3.88907e-05	-9.39615e-05	0.999304	-0.413901
258.8	0.647392	0.0479645	0.0736266	-0.0044789	-0.000267777	0.649081	0.0545145	0.0747529	0.00162686	0.00403559	0.00621739	0.115167	0.0839872	1	0.00674379		0.11952	0.0855485	1	1.21181	0.00556504	0.0986291	0.0705955	0.82521	1	0.00231726	0.000104778	-4.05584e-05	0.999291	-2.58337
259	0.664944	0.0495838	0.0756157	-0.00437687	3.94523e-05	0.666633	0.0561338	0.076742	0.00172888	0.00434282	0.00651456	0.115119	0.0842049	1	0.00706612		0.11947	0.0857703	1	1.21231	0.00582866	0.0985474	0.0707497	0.824874	1	0.00296853	5.19911e-05	0.000307982	0.998814	0.168812		0.168812
259.2	0.686609	0.0512891	0.0781063	-0.00422692	3.88318e-05	0.688298	0.0578391	0.0792326	0.00187884	0.0043422	0.0063086	0.115114	0.0840321	1	0.00684272		0.119465	0.0855942	1	1.2119	0.00564627	0.0985761	0.070628	0.82515	1	0.00245195	5.41875e-05	6.64479e-05	0.999197	0.815488
259.4	0.672074	0.0500412	0.0763443	-0.00438656	-4.93771e-05	0.673762	0.0565912	0.0774706	0.0017192	0.00425399	0.00631378	0.114982	0.0839928	1	0.00684834		0.119328	0.0855542	1	1.21173	0.0056517	0.0984771	0.070605	0.825266	1	0.00233687	-6.3632e-05	7.25101e-05	0.999341	-0.877561
259.6	0.694477	0.0520579	0.0790813	-0.00416166	0.000136698	0.696165	0.0586079	0.0802076	0.0019441	0.00444006	0.00637789	0.115213	0.0841867	1	0.00691788		0.119568	0.0857517	1	1.21224	0.0057067	0.098634	0.0707384	0.824921	1	0.00291423	0.000140809	0.000147716	0.9989	0.953242
259.8	0.668211	0.0497602	0.075918	-0.00430512	-0.000100658	0.6699	0.0563103	0.0770443	0.00180064	0.00420271	0.00627364	0.115009	0.0840577	1	0.0068048	0.0068646	0.119355	0.0856203	1	1.21178	0.00561554	0.0984959	0.0706566	0.825232	1	0.00253307	-3.85068e-05	2.54073e-05	0.999308	-1.51558			-0.302176
260	0.650698	0.0481657	0.0740229	-0.00421144	-0.00012911	0.652387	0.0547157	0.0751492	0.00189432	0.00417426	0.00639844	0.115191	0.0838701	1	0.00694016		0.119545	0.0854292	1	1.21191	0.00572661	0.0986412	0.0704911	0.825141	1	0.0019588	0.000120224	0.000171857	0.999163	0.699561		0.699561
260.2	0.6874	0.0515138	0.0781081	-0.00414487	0.000102356	0.689088	0.0580638	0.0792344	0.00196089	0.00440572	0.00639355	0.114984	0.0842617	1	0.00693486		0.11933	0.0858281	1	1.21209	0.0057214	0.0984496	0.0708098	0.825019	1	0.0031465	-6.41048e-05	0.000166063	0.999022	-0.386028
260.4	0.650614	0.048262	0.0737431	-0.00443497	-0.000118911	0.652303	0.054812	0.0748694	0.00167079	0.00418446	0.0064149	0.114777	0.0840284	1	0.00695802		0.119115	0.0855904	1	1.21166	0.00574253	0.098307	0.0706388	0.825312	1	0.00244764	-0.000249748	0.000191129	0.999377	-1.3067		-1.3067
260.6	0.660596	0.0492215	0.0751872	-0.00433399	-0.000182438	0.662284	0.0557715	0.0763135	0.00177177	0.00412093	0.0062223	0.115228	0.0842109	1	0.00674911		0.119583	0.0857763	1	1.21211	0.00556808	0.0986567	0.0707662	0.825009	1	0.00299035	0.000158432	-3.47837e-05	0.999044	-4.55478
260.8	0.712977	0.0535868	0.0814534	-0.00419444	0.000297583	0.714666	0.0601368	0.0825797	0.00191132	0.00460095	0.00643791	0.11555	0.0841467	1	0.00698297		0.119917	0.085711	1	1.21261	0.00575863	0.0988918	0.070683	0.824667	1	0.00278281	0.000439064	0.000218107	0.998568	2.01307		2.01307
261	0.683191	0.0510835	0.0776652	-0.00403668	0.000201564	0.68488	0.0576336	0.0787915	0.00206907	0.00450493	0.0065777	0.115044	0.0841514	1	0.0071346		0.119392	0.0857157	1	1.21224	0.00588546	0.0984887	0.0707084	0.824917	1	0.00280755	-1.65169e-05	0.000382039	0.998853	-0.0432336		-0.0432336
261.2	0.661111	0.0488974	0.075007	-0.00432099	-0.000172447	0.662799	0.0554474	0.0761333	0.00178477	0.00413092	0.00623253	0.114866	0.0836565	1	0.00676021		0.119208	0.0852116	1	1.21118	0.00558151	0.0984227	0.0703542	0.825642	1	0.0013262	-0.000164418	-2.28613e-05	0.999818	7.19199
261.4	0.665136	0.0496087	0.0758676	-0.00406652	-0.000164953	0.666825	0.0561587	0.0769939	0.00203924	0.00413841	0.00620615	0.115463	0.0842181	1	0.00673159		0.119827	0.0857836	1	1.21234	0.00555255	0.0988395	0.0707586	0.824849	1	0.0030058	0.000369264	-5.36698e-05	0.998848	-6.88029
261.6	0.650926	0.0482318	0.0737564	-0.00452015	-4.46492e-05	0.652615	0.0547818	0.0748827	0.00158561	0.00425872	0.00652562	0.114743	0.083942	1	0.00707812		0.119079	0.0855025	1	1.21166	0.00584167	0.0982777	0.0705664	0.825314	1	0.00218526	-0.000284053	0.000321061	0.999355	-0.884732		-0.884732
261.8	0.655942	0.0491425	0.0747169	-0.00418481	-0.000253809	0.657631	0.0556925	0.0758432	0.00192095	0.00404956	0.0061578	0.115328	0.0846866	1	0.00667915	0.00689488	0.119687	0.0862608	1	1.21263	0.005508	0.0987003	0.0711355	0.824656	1	0.00442359	0.000249758	-0.000110378	0.99863	-2.26275			0.0955924
262	0.645451	0.0477524	0.0732009	-0.00437554	-0.000206589	0.647139	0.0543024	0.0743272	0.00173022	0.00409678	0.0063306	0.114855	0.0839114	1	0.00686658		0.119196	0.0854713	1	1.21153	0.00566767	0.0983842	0.070548	0.8254	1	0.00209438	-0.000177558	9.22298e-05	0.999502	-1.92517
262.2	0.623034	0.0464856	0.0710731	-0.00406579	-0.000398787	0.624723	0.0530356	0.0721994	0.00203997	0.00390458	0.0062501	0.11557	0.0848947	1	0.00677927		0.119938	0.0864728	1	1.21319	0.00558797	0.0988618	0.0712772	0.824273	1	0.00504135	0.000462749	-2.10349e-06	0.998136	-219.991
262.4	0.638704	0.0472293	0.0726669	-0.0041425	-0.000347509	0.640393	0.0537793	0.0737932	0.00196326	0.00395586	0.00617724	0.115231	0.0839787	1	0.00670023		0.119586	0.0855398	1	1.21183	0.00552904	0.0986827	0.0705875	0.825201	1	0.0022905	0.000163092	-8.76608e-05	0.999287	-1.86049
262.6	0.600927	0.0442998	0.0680986	-0.00437622	-0.000354901	0.602616	0.0508498	0.0692249	0.00172954	0.00394847	0.00655221	0.114874	0.0843818	1	0.00710696		0.119216	0.0859504	1	1.21227	0.0058625	0.0983406	0.0709002	0.824897	1	0.00350794	-0.000167505	0.000352105	0.998839	-0.475725		-0.475725
262.8	0.614631	0.0456041	0.0697338	-0.00416685	-0.000449549	0.61632	0.0521541	0.0708601	0.00193891	0.00385382	0.00625295	0.114973	0.0846218	1	0.00678236		0.119318	0.0861949	1	1.2123	0.00559464	0.0984233	0.0711006	0.824881	1	0.0042363	-6.98164e-05	1.12706e-06	0.99889	-61.9458
263	0.609488	0.0447693	0.069282	-0.00425678	-0.000312854	0.611177	0.0513193	0.0704083	0.00184898	0.00399051	0.00652923	0.115201	0.0839679	1	0.00708203		0.119555	0.0855289	1	1.21217	0.00584245	0.0986293	0.0705587	0.824969	1	0.00225091	0.000125037	0.000325238	0.998923	0.384448		0.384448
263.2	0.631058	0.0468743	0.0717302	-0.00398174	-0.000205633	0.632747	0.0534243	0.0728565	0.00212402	0.00409773	0.0064761	0.115143	0.0844324	1	0.00702441		0.119495	0.086002	1	1.21252	0.00579322	0.0985508	0.0709282	0.824728	1	0.00365492	7.5024e-05	0.00026284	0.998645	0.285436		0.285436
263.4	0.610526	0.0448429	0.0691499	-0.00426239	-0.000548161	0.612215	0.0513929	0.0702762	0.00184337	0.00375521	0.00613381	0.11479	0.0839459	1	0.00665313		0.119129	0.0855064	1	1.21129	0.00549261	0.0983487	0.0705913	0.825567	1	0.00220473	-0.000229158	-0.000138762	0.999754	1.65145
263.6	0.605563	0.0447154	0.0686219	-0.00424906	-0.000393859	0.607252	0.0512654	0.0697482	0.0018567	0.00390951	0.00643803	0.114859	0.084422	1	0.00698311		0.1192	0.0859914	1	1.21217	0.00576082	0.0983356	0.0709398	0.824964	1	0.0036325	-0.000177441	0.000218206	0.998948	-0.813184		-0.813184
263.8	0.611519	0.0452213	0.0692646	-0.00410933	-0.000314122	0.613208	0.0517713	0.0703909	0.00199643	0.00398924	0.00650553	0.114791	0.084427	1	0.00705633	0.00690344	0.11913	0.0859965	1	1.21218	0.00582118	0.0982771	0.0709435	0.824958	1	0.00364796	-0.000239845	0.000297367	0.998927	-0.806562		-0.806562	-0.285117
264	0.577655	0.0420998	0.0654125	-0.00402138	-0.00079488	0.579343	0.0486498	0.0665388	0.00208437	0.00350849	0.00605597	0.114852	0.083974	1	0.0065687		0.119193	0.0855351	1	1.2113	0.00542287	0.098401	0.0706145	0.825562	1	0.00228969	-0.000171373	-0.000230114	0.999764	0.74473
264.2	0.574327	0.0420152	0.0652416	-0.00425332	-0.000639298	0.576016	0.0485652	0.0663679	0.00185243	0.00366407	0.00636105	0.115219	0.0843123	1	0.00689961		0.119573	0.0858796	1	1.21235	0.0056911	0.0986292	0.0708372	0.824843	1	0.0032933	0.000146068	0.000127958	0.998809	1.14153
264.4	0.531963	0.0384816	0.060199	-0.00413748	-0.000874517	0.533651	0.0450316	0.0613253	0.00196828	0.00342885	0.00642526	0.114916	0.0843839	1	0.00696926		0.11926	0.0859525	1	1.21218	0.00574935	0.0983843	0.0709073	0.824959	1	0.00351612	-0.000125677	0.000203231	0.998944	-0.618396		-0.618396
264.6	0.535815	0.0389434	0.0608254	-0.00416173	-0.0010091	0.537504	0.0454934	0.0619517	0.00194403	0.00329426	0.00612882	0.115258	0.0846384	1	0.00664772		0.119614	0.0862118	1	1.21247	0.00548277	0.0986531	0.071104	0.82476	1	0.00428106	0.000188647	-0.000144386	0.998764	-1.30655
264.8	0.507497	0.036534	0.0572334	-0.00427751	-0.0012261	0.509185	0.043084	0.0583597	0.00182825	0.00307727	0.00604351	0.114614	0.0846136	1	0.00655518		0.118946	0.0861865	1	1.21169	0.00540996	0.0981653	0.0711293	0.825295	1	0.00422718	-0.00038346	-0.00024471	0.999452	1.56699
265	0.483841	0.0344641	0.0548307	-0.00438342	-0.00116751	0.48553	0.0410141	0.055957	0.00172233	0.00313586	0.00645863	0.115249	0.0844729	1	0.00700545		0.119605	0.0860432	1	1.21265	0.00577696	0.0986309	0.0709544	0.824638	1	0.00377422	0.00017023	0.000242342	0.998537	0.702437		0.702437
265.2	0.481886	0.0343768	0.0544413	-0.00430778	-0.00128631	0.483575	0.0409268	0.0555676	0.00179798	0.00301706	0.00623907	0.11491	0.0846338	1	0.0067673		0.119253	0.0862071	1	1.21223	0.00558253	0.098375	0.0711146	0.824928	1	0.00427466	-0.00012547	-1.5168e-05	0.998951	8.27201
265.4	0.489194	0.0350051	0.055584	-0.00389871	-0.00123835	0.490883	0.0415551	0.0567103	0.00220705	0.00306502	0.00624389	0.115527	0.0846538	1	0.00677253		0.119893	0.0862275	1	1.21289	0.00558378	0.0988491	0.0710924	0.824475	1	0.00431705	0.000424688	-9.38674e-06	0.998383	-45.2434
265.6	0.489635	0.0347515	0.0554697	-0.00414424	-0.00125389	0.491324	0.0413015	0.056596	0.00196152	0.00304948	0.00620666	0.115191	0.0840617	1	0.00673215		0.119544	0.0856244	1	1.2119	0.00555503	0.0986421	0.070653	0.82515	1	0.00254172	0.000126171	-5.31426e-05	0.99922	-2.37421
265.8	0.459653	0.0324372	0.0518008	-0.00403921	-0.00150415	0.461342	0.0389872	0.0529271	0.00206655	0.00279922	0.00606755	0.114724	0.0845083	1	0.00658126	0.00674992	0.11906	0.0860792	1	1.21172	0.00543134	0.098257	0.0710389	0.825273	1	0.00390562	-0.00028584	-0.000216471	0.999415	1.32045			0.0420202
266	0.448557	0.0316542	0.050805	-0.00403974	-0.00150352	0.450245	0.0382042	0.0519313	0.00206602	0.00279985	0.00621849	0.11534	0.084852	1	0.00674498		0.119699	0.0864294	1	1.21287	0.00556116	0.0986906	0.07126	0.824488	1	0.00492044	0.000258668	-3.92039e-05	0.998411	-6.59802
266.2	0.43775	0.0305649	0.0493215	-0.00429469	-0.00153462	0.439438	0.0371149	0.0504478	0.00181107	0.00276875	0.00630065	0.114801	0.0844599	1	0.0068341		0.119139	0.08603	1	1.212	0.00563868	0.0982996	0.0709816	0.82508	1	0.00375176	-0.000225015	5.70524e-05	0.999124	-3.94401
266.4	0.431967	0.0302362	0.0486405	-0.0039805	-0.00138117	0.433656	0.0367863	0.0497668	0.00212525	0.0029222	0.00673853	0.114761	0.0848283	1	0.00730905		0.119098	0.0864052	1	1.21281	0.00602652	0.0982001	0.0712437	0.82453	1	0.00485289	-0.000274106	0.000570356	0.998353	-0.480587		-0.480587
266.6	0.415478	0.0287714	0.0468503	-0.00401999	-0.00149587	0.417166	0.0353215	0.0479766	0.00208577	0.0028075	0.00672993	0.115006	0.08467	1	0.00729972		0.119352	0.0862439	1	1.2129	0.00601842	0.0984028	0.0711058	0.824473	1	0.00436873	-5.55675e-05	0.000560285	0.998279	-0.0991772		-0.0991772
266.8	0.393411	0.0268604	0.0442701	-0.00417431	-0.00187845	0.3951	0.0334104	0.0453964	0.00193145	0.00242492	0.00613749	0.114899	0.0845619	1	0.00665713		0.119241	0.0861338	1	1.21203	0.00549253	0.0983811	0.0710656	0.825061	1	0.00406055	-0.000132423	-0.000134333	0.999137	0.985781
267	0.357736	0.0238223	0.0402753	-0.00421506	-0.00202472	0.359425	0.0303723	0.0414016	0.0018907	0.00227864	0.00633969	0.115189	0.0845026	1	0.00687645		0.119542	0.0860735	1	1.21249	0.00567133	0.098592	0.0709889	0.824748	1	0.00386864	0.000119773	0.000102888	0.998701	1.16411
267.2	0.357297	0.0242082	0.0402759	-0.00419776	-0.00195369	0.358986	0.0307582	0.0414022	0.001908	0.00234968	0.00654532	0.115331	0.0856809	1	0.00709948		0.11969	0.0872737	1	1.21406	0.0058477	0.0985864	0.0718856	0.82368	1	0.00740794	0.000240143	0.000343604	0.997355	0.698894		0.698894
267.4	0.341295	0.0229882	0.038229	-0.00422942	-0.00214116	0.342984	0.0295382	0.0393553	0.00187634	0.00216221	0.00630411	0.114744	0.0861213	1	0.00683785		0.119081	0.0877223	1	1.21364	0.00563416	0.0981186	0.0722803	0.823967	1	0.00875852	-0.000275242	6.10201e-05	0.997777	-4.51068
267.6	0.335521	0.0223026	0.0377914	-0.00405732	-0.00204201	0.337209	0.0288526	0.0389177	0.00204844	0.00226136	0.00670609	0.115411	0.0855629	1	0.00727387		0.119773	0.0871535	1	1.2142	0.00599067	0.0986435	0.0717785	0.823587	1	0.00704598	0.000306155	0.000531849	0.997201	0.575642		0.575642
267.8	0.335261	0.0222502	0.0377632	-0.00400318	-0.0022635	0.336949	0.0288002	0.0388895	0.00210258	0.00203987	0.00605393	0.115416	0.0854734	1	0.00656648	0.00694991	0.119779	0.0870623	1	1.21341	0.00541161	0.0987125	0.0717503	0.824126	1	0.00679416	0.000331868	-0.000232006	0.998009	-1.43043			0.173693
268	0.332591	0.0218014	0.0372675	-0.00403966	-0.00205917	0.334279	0.0283514	0.0383938	0.0020661	0.0022442	0.00671354	0.114855	0.0848135	1	0.00728194		0.119196	0.0863901	1	1.21287	0.0060039	0.0982764	0.071228	0.824492	1	0.0048061	-0.000189154	0.000541058	0.998311	-0.3496		-0.3496
268.2	0.330216	0.021848	0.0370106	-0.00383015	-0.0024646	0.331904	0.028398	0.0381369	0.00227561	0.00183877	0.00554006	0.114903	0.085561	1	0.00600911		0.119246	0.0871515	1	1.21241	0.00495635	0.0983548	0.0718831	0.824806	1	0.00708784	-0.000109049	-0.000834929	0.998971	0.130609
268.4	0.317761	0.0207275	0.0357607	-0.00408974	-0.00228389	0.319449	0.0272775	0.036887	0.00201602	0.00201947	0.00632174	0.115471	0.0853892	1	0.00685697		0.119835	0.0869765	1	1.21367	0.00564979	0.0987376	0.0716642	0.823948	1	0.00653164	0.000371421	8.18036e-05	0.997729	4.54041
268.6	0.306948	0.0198871	0.0342213	-0.00407557	-0.00241331	0.308636	0.0264372	0.0353476	0.00203019	0.00189005	0.00612389	0.114528	0.085658	1	0.00664237		0.118857	0.0872504	1	1.21275	0.00547712	0.0980061	0.0719443	0.824573	1	0.00737602	-0.00046203	-0.000150271	0.99856	3.07466
268.8	0.297707	0.0192634	0.0333225	-0.00404467	-0.00215103	0.299396	0.0258134	0.0344488	0.00206109	0.00215233	0.00718893	0.115061	0.0862184	1	0.00779758		0.11941	0.0878212	1	1.21503	0.00641761	0.0982772	0.0722791	0.823026	1	0.00901453	-2.10402e-05	0.00109644	0.996416	-0.0191895		-0.0191895
269	0.296236	0.0189221	0.0331501	-0.00399922	-0.00248829	0.297924	0.0254721	0.0342764	0.00210653	0.00181507	0.00609239	0.115051	0.0854985	1	0.00660821		0.119399	0.0870879	1	1.21309	0.0054474	0.098425	0.0717898	0.824338	1	0.00687997	4.64078e-06	-0.000187046	0.998268	-0.024811
269.2	0.295639	0.0192064	0.0333257	-0.00400409	-0.00248466	0.297327	0.0257564	0.034452	0.00210167	0.00181871	0.00611686	0.115872	0.0866265	1	0.00663475		0.120252	0.0882369	1	1.21512	0.00546015	0.0989625	0.0726156	0.822962	1	0.0102448	0.000735088	-0.000157945	0.996572	-4.65407
269.4	0.292814	0.0185682	0.0328154	-0.00416558	-0.00243197	0.294502	0.0251182	0.0339417	0.00194018	0.0018714	0.00635445	0.115251	0.0852903	1	0.00689245		0.119607	0.0868758	1	1.21338	0.0056804	0.0985736	0.0715985	0.824148	1	0.00623982	0.000174817	0.000120116	0.997969	1.45541
269.6	0.293887	0.0187391	0.0327433	-0.00400098	-0.00245953	0.295576	0.0252891	0.0338696	0.00210478	0.00184383	0.0062381	0.114589	0.0855588	1	0.00676625		0.118919	0.0871493	1	1.21283	0.00557887	0.0980508	0.0718558	0.824515	1	0.0070721	-0.000411874	-1.63526e-05	0.99846	25.1872
269.8	0.287593	0.0183859	0.0323623	-0.0038811	-0.00259476	0.289282	0.0249359	0.0334886	0.00222466	0.00170861	0.00590639	0.115765	0.0861995	1	0.00640645	0.00678961	0.12014	0.0878019	1	1.21435	0.00527563	0.0989336	0.0723037	0.823487	1	0.0089714	0.000646358	-0.00040451	0.997261	-1.59788			-0.184395
270	0.270491	0.0168942	0.0302528	-0.0038812	-0.00259046	0.27218	0.0234442	0.0313791	0.00222456	0.00171291	0.0062933	0.115288	0.0861352	1	0.00682612		0.119645	0.0877364	1	1.21421	0.00562187	0.0985379	0.0722581	0.823582	1	0.0087826	0.00020987	4.84347e-05	0.997297	4.33306
270.2	0.257592	0.0158513	0.0285868	-0.0040725	-0.00252576	0.259281	0.0224013	0.0297131	0.00203326	0.00177761	0.00685592	0.114598	0.0863979	1	0.00743638		0.118929	0.088004	1	1.21437	0.00612365	0.097935	0.0724689	0.823472	1	0.00957916	-0.000422502	0.000707043	0.99705	-0.597562		-0.597562
270.4	0.247729	0.0151173	0.0276429	-0.00390989	-0.00269261	0.249418	0.0216674	0.0287692	0.00219587	0.00161076	0.00645806	0.115345	0.0868718	1	0.00700484		0.119705	0.0884867	1	1.2152	0.00576437	0.0985066	0.0728168	0.822912	1	0.0109891	0.000255317	0.000241191	0.996445	1.05857		1.05857
270.6	0.250499	0.0151956	0.0279748	-0.00371687	-0.00280896	0.252187	0.0217456	0.0291011	0.00238889	0.00149441	0.0059258	0.115395	0.0862281	1	0.00642751		0.119756	0.0878311	1	1.21401	0.00529443	0.0986447	0.0723476	0.823713	1	0.00906931	0.000316537	-0.000381954	0.997541	-0.82873
270.8	0.246355	0.0150134	0.0273419	-0.00372905	-0.00281979	0.248044	0.0215634	0.0284682	0.00237671	0.00148357	0.00598109	0.114771	0.0869339	1	0.00648748		0.119108	0.0885499	1	1.21415	0.00534325	0.0981005	0.0729319	0.823624	1	0.0112104	-0.000241163	-0.000317285	0.997439	0.760083
271	0.249781	0.0151349	0.0277301	-0.00376616	-0.00267525	0.251469	0.0216849	0.0288564	0.0023396	0.00162811	0.00647441	0.114751	0.0862328	1	0.00702257		0.119088	0.0878359	1	1.21395	0.00578491	0.0981001	0.0723556	0.823759	1	0.00908885	-0.000274108	0.00026047	0.997484	-1.05236		-1.05236
271.2	0.248424	0.0150935	0.0276758	-0.00363268	-0.00276205	0.250113	0.0216435	0.0288021	0.00247308	0.00154132	0.0061625	0.115157	0.0865348	1	0.00668425		0.119509	0.0881435	1	1.21434	0.00550444	0.0984149	0.0725857	0.823495	1	0.00999236	9.67048e-05	-0.000104753	0.997227	-0.923169
271.4	0.239082	0.0144414	0.0267455	-0.00389872	-0.00274241	0.240771	0.0209914	0.0278718	0.00220704	0.00156096	0.00648316	0.115761	0.0871843	1	0.00703206		0.120136	0.0888051	1	1.21597	0.00578307	0.0987981	0.0730321	0.822387	1	0.0119119	0.000623686	0.000270461	0.995791	2.30601		2.30601
271.6	0.233087	0.0139834	0.0257036	-0.00359206	-0.00289791	0.234776	0.0205334	0.0268299	0.0025137	0.00140545	0.00598637	0.114279	0.0874597	1	0.00649321		0.118598	0.0890856	1	1.21418	0.00534783	0.0976777	0.0733712	0.823603	1	0.0128076	-0.000679169	-0.000311186	0.997426	2.18251
271.8	0.231907	0.0138468	0.025883	-0.00355666	-0.00279103	0.233596	0.0203968	0.0270093	0.0025491	0.00151234	0.00647416	0.115624	0.0873167	1	0.00702229	0.00684367	0.119994	0.0889398	1	1.21596	0.00577512	0.0986828	0.073144	0.822398	1	0.012314	0.000502409	0.00025991	0.995811	1.93301		1.93301	0.729533
272	0.225275	0.0132273	0.0250358	-0.00354444	-0.00272019	0.226964	0.0197773	0.0261621	0.00256132	0.00158317	0.00697544	0.11527	0.0871385	1	0.00756602		0.119626	0.0887583	1	1.21595	0.00622231	0.0983807	0.072995	0.822402	1	0.0117762	0.000171245	0.000846012	0.995705	0.202414		0.202414
272.2	0.223891	0.013207	0.0249906	-0.00375474	-0.00301187	0.225579	0.019757	0.0261169	0.00235102	0.0012915	0.00572524	0.115777	0.0875835	1	0.00620997		0.120153	0.0892117	1	1.21557	0.00510867	0.0988445	0.0733906	0.822656	1	0.0131332	0.000662549	-0.000615986	0.996298	-1.07559
272.4	0.212563	0.0122421	0.0232865	-0.00349353	-0.00302659	0.214252	0.0187921	0.0244128	0.00261223	0.00127678	0.00595924	0.113944	0.0877105	1	0.00646378		0.118251	0.089341	1	1.21406	0.00532412	0.0974015	0.0735889	0.823686	1	0.0135739	-0.000976331	-0.000343055	0.997542	2.84599
272.6	0.214361	0.0124936	0.02369	-0.00347824	-0.00292292	0.21605	0.0190436	0.0248163	0.00262752	0.00138045	0.0063895	0.114864	0.0881443	1	0.00693046		0.119205	0.0897829	1	1.21592	0.00569978	0.0980371	0.0738396	0.822424	1	0.0148268	-0.000170812	0.000160775	0.995884	-1.06243
272.8	0.206948	0.011888	0.0228661	-0.00328806	-0.00301176	0.208636	0.018438	0.0239924	0.0028177	0.0012916	0.00619069	0.114996	0.088374	1	0.00671483		0.119342	0.0900168	1	1.21607	0.00552172	0.0981375	0.0740225	0.822318	1	0.015517	-4.67946e-05	-7.16684e-05	0.9958	0.652932
273	0.204923	0.0115495	0.0225965	-0.00358119	-0.00306263	0.206611	0.0180995	0.0237227	0.00252457	0.00124073	0.00600515	0.114818	0.0876019	1	0.00651358		0.119158	0.0892303	1	1.2149	0.00536141	0.0980801	0.0734466	0.823112	1	0.0132142	-0.000199415	-0.000288915	0.996811	0.690219
273.2	0.202864	0.011393	0.0225444	-0.00348648	-0.00293816	0.204552	0.017943	0.0236707	0.00261928	0.00136521	0.00667414	0.11572	0.0877183	1	0.00723921		0.120093	0.089349	1	1.21668	0.00594996	0.0987055	0.0734366	0.821908	1	0.0135084	0.000580634	0.000493482	0.995166	1.17661		1.17661
273.4	0.210882	0.0121789	0.0233407	-0.00328299	-0.00302185	0.212571	0.0187289	0.024467	0.00282277	0.00128152	0.00602866	0.115101	0.0881067	1	0.00653908		0.119451	0.0897445	1	1.21573	0.00537871	0.0982541	0.0738192	0.822548	1	0.0147172	5.12845e-05	-0.00026117	0.996114	-0.196364
273.6	0.198789	0.0111855	0.0219427	-0.00335295	-0.00297496	0.200478	0.0177355	0.023069	0.00275281	0.00132841	0.00662622	0.11507	0.0884665	1	0.00718723		0.119419	0.0901111	1	1.21672	0.00590706	0.0981488	0.0740608	0.821883	1	0.0157761	5.22919e-06	0.000437339	0.995167	0.0119568		0.0119568
273.8	0.195744	0.010941	0.0216495	-0.00332885	-0.00317091	0.197433	0.017491	0.0227758	0.00277691	0.00113246	0.00573592	0.115359	0.0885923	1	0.00622155	0.00675857	0.119719	0.0902392	1	1.21618	0.00511565	0.0984388	0.0741989	0.822247	1	0.0161729	0.000290544	-0.000603273	0.995812	-0.481613			0.463659
274	0.190376	0.010519	0.0210502	-0.00325664	-0.00299868	0.192065	0.017069	0.0221765	0.00284912	0.00130469	0.00679296	0.115464	0.0888711	1	0.00736809		0.119828	0.0905232	1	1.21772	0.00605073	0.0984035	0.0743383	0.821207	1	0.0169658	0.000349363	0.000631747	0.994297	0.55301		0.55301
274.2	0.186061	0.01006	0.0206102	-0.00332777	-0.00336183	0.18775	0.01661	0.0217365	0.00277799	0.000941537	0.00501485	0.115773	0.0884688	1	0.00543943		0.120149	0.0901134	1	1.2157	0.00447431	0.0988309	0.0741246	0.82257	1	0.0158121	0.00068174	-0.00144678	0.996365	-0.47121
274.4	0.183461	0.00994175	0.0200387	-0.00319311	-0.00314677	0.18515	0.0164918	0.021165	0.00291265	0.00115659	0.00624681	0.114313	0.0890727	1	0.0067757		0.118634	0.0907285	1	1.21614	0.00557149	0.0975494	0.0746038	0.822275	1	0.017635	-0.000655952	-6.18334e-06	0.995754	106.084
274.6	0.179431	0.00965375	0.0195435	-0.00319965	-0.00311285	0.18112	0.0162038	0.0206698	0.00290611	0.00119052	0.00657307	0.114122	0.0894643	1	0.00712959		0.118435	0.0911274	1	1.21669	0.00585981	0.0973421	0.0748976	0.821901	1	0.0188029	-0.000835718	0.000375067	0.995228	-2.22818		-2.22818
274.8	0.17613	0.00928994	0.0193246	-0.00337518	-0.00297431	0.177819	0.01584	0.0204509	0.00273058	0.00132906	0.00747423	0.11501	0.0890793	1	0.00810704		0.119356	0.0907352	1	1.2182	0.00665494	0.0979778	0.0744831	0.820884	1	0.0175818	-7.55131e-05	0.00142658	0.993756	-0.0529329		-0.0529329
275	0.171643	0.00904769	0.0187508	-0.00352393	-0.00342159	0.173331	0.0155977	0.0198771	0.00258183	0.000881778	0.00508725	0.114677	0.0899879	1	0.00551796		0.119011	0.0916608	1	1.21619	0.00453709	0.0978556	0.0753672	0.82224	1	0.0204036	-0.00029572	-0.00136176	0.995979	0.21716
275.2	0.165118	0.00830912	0.0180614	-0.00321661	-0.00321535	0.166807	0.0148591	0.0191877	0.00288915	0.00108802	0.00652263	0.11503	0.0890799	1	0.00707487		0.119377	0.0907359	1	1.21719	0.00581247	0.0980762	0.0745455	0.821566	1	0.0176176	-2.76422e-05	0.00031616	0.994808	-0.0874311		-0.0874311
275.4	0.167218	0.00852987	0.0183911	-0.00309903	-0.00337202	0.168906	0.0150799	0.0195174	0.00300673	0.000931343	0.00551396	0.115552	0.0892795	1	0.0059808		0.119919	0.0909392	1	1.21684	0.00491503	0.0985494	0.074734	0.821802	1	0.018231	0.000468106	-0.000862266	0.99532	-0.542879
275.6	0.162892	0.00823101	0.017753	-0.00302155	-0.00304686	0.164581	0.014781	0.0188793	0.00308421	0.00125651	0.00763459	0.114712	0.0898101	1	0.00828097		0.119047	0.0914797	1	1.21881	0.00679432	0.0976751	0.0750567	0.820474	1	0.0197719	-0.00034498	0.00161288	0.99323	-0.21389		-0.21389
275.8	0.157905	0.0079548	0.0173275	-0.00326395	-0.00335602	0.159594	0.0145048	0.0184538	0.0028418	0.000947344	0.00593597	0.11563	0.0908859	1	0.00643855	0.0068113	0.12	0.0925754	1	1.21901	0.00528177	0.0984401	0.0759429	0.820335	1	0.0230107	0.000523227	-0.000368475	0.993441	-1.41998			-0.405885
276	0.152909	0.00742617	0.0164299	-0.00327667	-0.00331911	0.154598	0.0139762	0.0175562	0.00282909	0.000984256	0.00636657	0.113561	0.0904037	1	0.0069056		0.117853	0.0920842	1	1.21684	0.00567502	0.0968512	0.0756747	0.821799	1	0.0216447	-0.00132797	0.000133622	0.995171	-9.93829
276.2	0.144954	0.00679353	0.0153285	-0.00316707	-0.00340239	0.146642	0.0133435	0.0164548	0.00293868	0.000900972	0.00614401	0.11221	0.0909938	1	0.00666419		0.116451	0.0926853	1	1.2158	0.00548132	0.0957813	0.076234	0.822503	1	0.0234786	-0.00252316	-0.000126802	0.996116	19.8984
276.4	0.14107	0.00636396	0.0153969	-0.00328151	-0.00345647	0.142758	0.012914	0.0165232	0.00282425	0.000846898	0.00593239	0.115742	0.0904603	1	0.00643466		0.120117	0.092142	1	1.21869	0.00527996	0.0985618	0.0756072	0.820551	1	0.0217359	0.000623354	-0.000372736	0.9937	-1.67237
276.6	0.13802	0.00622129	0.0150517	-0.00321519	-0.00339939	0.139708	0.0127713	0.016178	0.00289057	0.000903977	0.00647047	0.115799	0.0914141	1	0.00701829		0.120175	0.0931135	1	1.22031	0.00575125	0.0984796	0.0763033	0.819466	1	0.0245552	0.000655564	0.000254716	0.992256	2.5737		2.5737
276.8	0.138559	0.00629811	0.0149037	-0.00308856	-0.00351561	0.140247	0.0128481	0.01603	0.00301719	0.000787759	0.00561694	0.114298	0.0916107	1	0.0060925		0.118618	0.0933137	1	1.21802	0.00500195	0.0973857	0.0766107	0.821002	1	0.0252476	-0.000648079	-0.000741452	0.994363	0.874067
277	0.137768	0.00637323	0.014989	-0.00309344	-0.00317972	0.139457	0.0129233	0.0161153	0.00301232	0.00112364	0.00805729	0.115558	0.0926685	1	0.00873947		0.119925	0.0943912	1	1.22306	0.0071456	0.0980536	0.0771765	0.817624	1	0.0282269	0.000390679	0.00209885	0.989655	0.186139		0.186139
277.2	0.128657	0.00538808	0.013713	-0.00316491	-0.00347684	0.130345	0.0119381	0.0148393	0.00294084	0.000826525	0.00634104	0.113846	0.0915883	1	0.00687791		0.118149	0.0932908	1	1.21832	0.00564542	0.0969768	0.0765735	0.820804	1	0.0251705	-0.00107249	0.00010372	0.993964	-10.3403
277.4	0.119397	0.00456313	0.0127555	-0.00315134	-0.00361305	0.121086	0.0111131	0.0138818	0.00295442	0.000690317	0.00570106	0.114644	0.0917791	1	0.00618374		0.118977	0.0934852	1	1.21865	0.00507427	0.0976307	0.0767124	0.820583	1	0.0257301	-0.00034336	-0.000642861	0.993826	0.534112
277.6	0.114693	0.00426441	0.0124576	-0.00298393	-0.00357377	0.116382	0.0108144	0.0135839	0.00312183	0.000729596	0.00626898	0.116718	0.0929218	1	0.00679974		0.12113	0.0946492	1	1.22258	0.0055618	0.0990773	0.0774176	0.817943	1	0.0290041	0.0014741	2.00851e-05	0.990434	73.3928
277.8	0.113095	0.00422417	0.0122194	-0.00323578	-0.00345981	0.114784	0.0107742	0.0133457	0.00286998	0.000843552	0.00734907	0.116268	0.0938652	1	0.00797128	0.00696874	0.120662	0.0956101	1	1.22424	0.00651118	0.0985608	0.0780973	0.816831	1	0.0317741	0.00104027	0.0012744	0.988843	0.816282		0.816282	1.19204
278	0.113063	0.00393527	0.0120476	-0.00330109	-0.00380395	0.114751	0.0104853	0.0131739	0.00280467	0.000499413	0.00435214	0.114804	0.091374	1	0.00472061		0.119143	0.0930726	1	1.21694	0.00387909	0.0979041	0.0764811	0.821736	1	0.0245718	-0.000159092	-0.0022198	0.995541	0.0716694
278.2	0.109662	0.00391937	0.0117368	-0.00316153	-0.00353203	0.11135	0.0104694	0.0128631	0.00294423	0.000771332	0.00692708	0.115519	0.0940221	1	0.00751356		0.119885	0.0957699	1	1.22317	0.00614271	0.0980116	0.0782966	0.817549	1	0.0322991	0.000392071	0.00078485	0.989834	0.499548		0.499548
278.4	0.106655	0.00373738	0.0112947	-0.00302685	-0.00360338	0.108344	0.0102874	0.012421	0.00307891	0.000699984	0.00646076	0.114644	0.0949513	1	0.00700777		0.118977	0.0967164	1	1.2227	0.00573138	0.0973066	0.0791006	0.817861	1	0.0351247	-0.000366592	0.000242717	0.990349	-1.51037		-1.51037
278.6	0.103866	0.00345765	0.0110051	-0.00306477	-0.00370758	0.105555	0.0100077	0.0121314	0.00304099	0.000595781	0.00564429	0.11493	0.0948103	1	0.00612216		0.119274	0.0965728	1	1.22197	0.00501008	0.0976078	0.0790305	0.818352	1	0.034733	-8.79393e-05	-0.000707115	0.991129	0.124363
278.8	0.102545	0.00342906	0.0107114	-0.00322358	-0.00366982	0.104234	0.00997908	0.0118377	0.00288218	0.000633548	0.00607813	0.113569	0.0957372	1	0.00659274		0.117861	0.097517	1	1.22197	0.00539517	0.0964516	0.079803	0.81835	1	0.0375347	-0.00130611	-0.000202558	0.991063	6.44808
279	0.0961551	0.00264092	0.0100657	-0.00327036	-0.00364287	0.0978437	0.00919093	0.011192	0.00283539	0.000660493	0.00675049	0.114387	0.0939348	1	0.00732202		0.11871	0.095681	1	1.22171	0.00599324	0.0971667	0.0783171	0.818523	1	0.0321083	-0.000603806	0.000580057	0.991088	-1.04094		-1.04094
279.2	0.0926624	0.00234772	0.00986301	-0.00330722	-0.00364321	0.094351	0.00889774	0.0109893	0.00279854	0.000660158	0.00699683	0.116473	0.0943046	1	0.00758922		0.120875	0.0960577	1	1.22452	0.0061977	0.0987117	0.0784451	0.816646	1	0.0330825	0.00123163	0.000865156	0.988696	1.4236		1.4236
279.4	0.0897328	0.0022757	0.0092919	-0.00317522	-0.00370608	0.0914215	0.00882572	0.0104182	0.00293054	0.000597285	0.00653332	0.113958	0.0965388	1	0.00708646		0.118265	0.0983334	1	1.22368	0.00579109	0.0966465	0.0803585	0.817204	1	0.0398604	-0.00097485	0.000326697	0.989555	-2.98396		-2.98396
279.6	0.0906775	0.002363	0.00957624	-0.00319725	-0.00379365	0.0923661	0.00891301	0.0107025	0.00290851	0.000509718	0.00551846	0.115871	0.0964966	1	0.00598568		0.12025	0.0982904	1	1.22453	0.00488816	0.0982013	0.0802681	0.816642	1	0.0396798	0.000746927	-0.00085157	0.989062	-0.877118
279.8	0.0878262	0.00222736	0.00918786	-0.00297751	-0.00389539	0.0895149	0.00877737	0.0103142	0.00312825	0.000407978	0.00455766	0.115223	0.0980549	1	0.00494354	0.00648838	0.119578	0.0998777	1	1.2244	0.00403752	0.0976623	0.0815729	0.816727	1	0.0443784	0.00020516	-0.00196753	0.989412	-0.104273			-0.722426
280	0.085144	0.00176643	0.0088132	-0.00312874	-0.00349865	0.0868327	0.00831645	0.00993949	0.00297702	0.000804712	0.00926739	0.114467	0.0957756	1	0.010052		0.118793	0.097556	1	1.2264	0.00819635	0.0968634	0.0795465	0.815394	1	0.0374249	-0.000609901	0.00349588	0.986699	-0.174463		-0.174463
280.2	0.0807543	0.00150177	0.00844359	-0.00313577	-0.00377571	0.0824429	0.00805179	0.00956989	0.00296999	0.00052766	0.00640031	0.116079	0.0976651	1	0.0069422		0.120466	0.0994806	1	1.22689	0.00565838	0.0981883	0.0810836	0.81507	1	0.0430656	0.000901203	0.000172102	0.986942	5.23645		5.23645
280.4	0.0777166	0.00133827	0.00790171	-0.00326582	-0.00382821	0.0794052	0.00788829	0.009028	0.00283993	0.000475157	0.00598395	0.113695	0.0993422	1	0.00649059		0.117992	0.101189	1	1.22567	0.00529554	0.0962675	0.0825579	0.815879	1	0.0481851	-0.0011876	-0.000311177	0.988089	3.81647
280.6	0.0784605	0.00132163	0.00814791	-0.00316455	-0.00370125	0.0801492	0.00787164	0.00927421	0.0029412	0.000602112	0.0075124	0.115712	0.0982124	1	0.00814844		0.120085	0.100038	1	1.22827	0.00663407	0.0977675	0.0814463	0.814152	1	0.0446344	0.000541958	0.0014592	0.985577	0.371409		0.371409
280.8	0.0752368	0.000797625	0.00782609	-0.00326919	-0.00383013	0.0769254	0.00734764	0.00895238	0.00283656	0.000473237	0.0061519	0.116377	0.0955164	1	0.00667275		0.120776	0.097292	1	1.22474	0.0054483	0.0986134	0.0794389	0.816499	1	0.0367178	0.00117412	-0.000115938	0.988723	-10.1272
281	0.0540016	-0.00101481	0.00522697	-0.00391178	-0.00396213	0.0556902	0.00553521	0.00635326	0.00219398	0.000341232	0.00612733	0.114082	0.0993929	1	0.00664611		0.118394	0.101241	1	1.22628	0.00541973	0.0965472	0.082559	0.815474	1	0.0482997	-0.000850267	-0.000144702	0.987553	5.876
281.2	0.0293221	-0.00360353	0.00232682	-0.00493776	-0.00409929	0.0310107	0.00294648	0.00345311	0.001168	0.000204075	0.00658079	0.111352	0.0950149	1	0.00713796		0.11556	0.0967812	1	1.21948	0.00585328	0.0947621	0.0793627	0.820022	1	0.035489	-0.00329026	0.000382689	0.993031	-8.59773		-8.59773
281.4	0.0184119	-0.00461436	0.00127433	-0.0055165	-0.00421992	0.0201005	0.00193566	0.00240063	0.000589256	8.34473e-05	0.0041515	0.119431	0.0962991	1	0.00450299		0.123945	0.0980892	1	1.22654	0.0036713	0.101053	0.0799725	0.815303	1	0.0389642	0.00392743	-0.00243415	0.987663	-1.61347
281.6	0.0103232	-0.00549614	0.000194995	-0.00586761	-0.00432874	0.0120118	0.00105388	0.00132129	0.000238147	-2.53727e-05	-0.00211231	0.109999	0.0877369	1	-0.00229115		0.114156	0.0893679	1	1.20123	-0.00190733	0.0950325	0.0743968	0.832478	1	0.0140713	-0.00427844	-0.00990147	1.01026	0.432102
281.8	0.0160012	-0.00501417	0.000937416	-0.00588143	-0.00419696	0.0176898	0.00153585	0.00206371	0.00022433	0.00010641	0.00601534	0.116661	0.0868208	1	0.00652463	0.00608265	0.12107	0.0884348	1	1.21603	0.00536552	0.0995616	0.0727242	0.822349	1	0.0108042	0.0014387	-0.000276392	0.995831	-5.20528			-0.791083
282	0.0139028	-0.00498324	0.000642376	-0.00576694	-0.00430501	0.0155915	0.00156678	0.00176867	0.000338818	-1.64369e-06	-0.000105422	0.113438	0.10049	1	-0.000114348		0.117726	0.102358	1	1.21997	-9.37303e-05	0.0964989	0.0839019	0.819693	1	0.0519862	-0.00122791	-0.00740976	0.99417	0.165715
282.2	0.00486875	-0.00603139	-0.000437354	-0.0059437	-0.00429516	0.00655737	0.00051863	0.000688938	0.000162054	8.20831e-06	0.00125177	0.105063	0.0790913	1	0.00135775		0.109034	0.0805615	1	1.19095	0.00114005	0.0915519	0.0676446	0.839663	1	-0.0123212	-0.00890548	-0.00597157	1.01831	1.49131
282.4	0.00213905	-0.00613681	-0.000683924	-0.00594029	-0.00426799	0.00382767	0.000413206	0.000442369	0.000165464	3.53743e-05	0.00924174	0.115571	0.107953	1	0.0100242		0.119939	0.109959	1	1.23992	0.00808453	0.0967313	0.0886824	0.806502	1	0.0729341	0.000360472	0.00342855	0.975913	0.105138		0.105138
282.6	0.00104083	-0.00631598	-0.000893007	-0.00607536	-0.00422313	0.00272944	0.000234041	0.000233285	3.03948e-05	8.02363e-05	0.0293966	0.0854699	0.0857469	1	0.0318855		0.0887002	0.0873409	1	1.20793	0.0263968	0.0734318	0.0723064	0.827865	1	0.00792618	-0.02722	0.027238	0.997777	-0.999338		-0.999338
282.8	0.000193313	-0.00636039	-0.000904719	-0.00581698	-0.00421176	0.00188193	0.000189626	0.000221574	0.000288783	9.16103e-05	0.0486789	0.117737	0.100762	1	0.0528003		0.122187	0.102635	1	1.27762	0.041327	0.0956365	0.0803326	0.782704	1	0.0493451	0.000989396	0.0472171	0.938061	0.0209542		0.0209542
283	0.00215954	-0.00628258	-0.000686844	-0.00600369	-0.00431413	0.00384816	0.000267437	0.000439448	0.000102072	-1.07617e-05	-0.00279658	0.114197	0.0694974	1	-0.00303335		0.118513	0.0707893	1	1.18627	-0.00255705	0.0999039	0.0596739	0.842979	1	-0.0421206	-0.000483651	-0.0108457	1.02305	0.0445938
283.2	-0.000279709	-0.0063692	-0.000943146	-0.00607313	-0.00445385	0.00140891	0.000180814	0.000183146	3.26268e-05	-0.000150486	-0.10681	0.129991	0.128336	1	-0.115853		0.134904	0.130722	1	1.14977	-0.100762	0.117331	0.113694	0.869737	1	0.145719	0.0178523	-0.139814	1.08141	-0.127686
283.4	-0.000721661	-0.00643103	-0.000997082	-0.00591798	-0.00423643	0.000966957	0.00011899	0.00012921	0.000187783	6.69343e-05	0.0692216	0.133625	0.123056	1	0.0750823		0.138676	0.125344	1	1.3391	0.0560691	0.103559	0.093603	0.746769	1	0.107261	0.0131795	0.0668642	0.890105	0.197109		0.197109
283.6	-0.00103691	-0.00681197	-0.00109539	-0.0063324	-0.00424704	0.000651705	-0.000261957	3.09034e-05	-0.000226637	5.63253e-05	0.0864277	0.0474193	-0.401956	1	0.0937451		0.0492115	-0.409428	1	0.733528	0.1278	0.0670887	-0.558163	1.36327	1	-2.42079	-0.103919	0.15539	1.62224	-0.668763		-0.668763
283.8	-0.0010131	-0.00642838	-0.000917814	-0.00618798	-0.0044871	0.000675515	0.00012164	0.000208479	-8.22222e-05	-0.000183735	-0.271992	0.308622	0.18007	1	-0.29502	-0.0149126	0.320286	0.183418	1	1.20868	-0.244084	0.264988	0.15175	0.827346	1	0.294194	0.182065	-0.327281	1.06334	-0.556296			-0.26898
[truncated: 155 more rows]
