# Supplementary material for: Analytical factors to be considered for the application of enriched strontium spikes to monitor biological systems
Source: Royal Society of Chemistry journal article supplement (doi:10.1039/c3ja50212k), 2013-09-24
Supplement: c3ja50212k_2.xlsx [file c3ja50212k_2.xlsx]

## Sheet: certificates of analyses
reproduced from: Certificates of Analyses (84SrCO3, MW=144.01 g mol-1 and 86SrCO3, MW=146.01 g mol-1; Trace Sciences International Corp., Richmond Hill, Ontario, Canada)
86SrCO3				84SrCO3
Weight of enriched isotope:				Weight of enriched isotope:
compound weight	424.3	mg		compound weight	85.4	mg
element weight	250.3	mg		element weight	50.1	mg
enrichment %				enrichment %
isotope		uncertainty		isotope		uncertainty
84	0.002			84	76.4	1.1
86	96.3	0.3		86	4.64
87	1.02			87	1.96
88	2.68			88	17

## Sheet: details - solution preparation
Details on preparation of tracer solution
1	STOCK SOLUTIONS
		Stock solution spike 1 (86SrCO3 product)			Stock solution spike 1 (84SrCO3 product)
		m (86SrCO3 product)	0.17	g	m (84SrCO3 product)	0.04847	g
		m (stock) after neutralization	4.52615	g	m (stock) after neutralization	4.1743	g
		Sr-84	0.000443137	mg Sr-84/g solution	Sr-84	5.2043	mg Sr-84/g solution
		Sr-86	21.337	mg Sr-86/g solution	Sr-86	0.316073	mg Sr-86/g solution
		Sr-87	0.226	mg Sr-87/g solution	Sr-87	0.133514	mg Sr-87/g solution
		Sr-88	0.593803	mg Sr-88/g solution	Sr-88	1.15803	mg Sr-88/g solution
	The mass fraction of each Sr isotope deriving from the tracer products in each of the two neutralized stock solutions was calculated using the certified isotopic composition given on the certificate of analysis of the two isotope products; these mass fractions do not account for additional natural Sr from the added solutions of HCl and NaOH, thus a deviation from these values has to be considered;
2	TRACER SOLUTION (for administration to fish)
	weight fish /kg	injected volume /mL	m (stock SrCO3-86) /g	m (stock SrCO3-84) /g	m (NaCl) /g	m (H2O) /g	m (tracer solution) total /g	m (Sr-86 total) /mg	m (Sr-84 total) /mg	m (Sr-86/mg g-1 solution)	m (Sr-84/mg g-1 solution)	theoretical xSp1/xSp2	mg Sr-86 /kg fish	mg Sr-84 /kg fish
	9.1	5	1.34675	1.1101	0.02664	4.53695	7.02044	29.0865	5.77789	4.14312	0.82301	5.03411	2.27644	0.452203
